# Supplementary material for: Modulation of carbon-to-nitrogen ratio shapes the microbial ecology in a methanol-fed recirculating marine denitrifying reactor
Source: PeerJ. 2025 Oct 13;13:e20129. doi: 10.7717/peerj.20129 (PMC12530212; doi:10.7717/peerj.20129)
Supplement: Supplemental Information 2 — This file describes the analysis of the raw data of the measured physical-chemistry parameters that include (1) the nitrate and NOx reduction rates, (2) the nitrite and N2O dynamics, (3) the methanol consumption rates, and (4) the CO2 production rates for the eight conditions and the two periods. Also provided, the global results and the Pearson correlation analysis. [file peerj-13-20129-s002.xlsx]

## Sheet: Introduction
	Global results	Summary of results
	Correlation analysis	Summary of the results with Pearson correlation between all possible combination of
		initial paramaters (methanol, nitrate, C/N) and the measured parameters
	C1 to C8	Correspond to Condition1 to Condition8 for both periods
	In each condition sheet, raw data and calculation of	NO3 and NOx reduction rates
		Nitrite dynamics
		Methanol consumption
		N2O dynamics
		CO2 production

## Sheet: Global results
		Operating conditions
			Conditions	nitrate	methanol	C/N
				(mM)	(v/v, %)	ratio
			C1	10.7	0.075	1.5
			C2	10.7	0.15	3
			C3	21.4	0.15	1.5
			C4	21.4	0.3	3
			C5	21.4	0.45	4.5
			C6	21.4	0.75	7.5
			C7	32.1	0.45	3
			C8	42.8	0.6	3
			NO3- reduction	NOx reduction	NO2- dynamics	N2O dynamics	Methanol	Methanol	Proportion of	CO2 production	residual NOx	residual NO3-	residual NO2-	residual NOx	residual NO3-	residual NO2-
			rates	rates	AUC	AUC	consumption	consumed	methanol	rates	after 4days	after 4days	after 4days	after 4days	after 4days	after 4days
			mM/h	mM/h	mM-h	mM-h	rates. k (h-1)	% (v/v)	consumed (%)	ppmv/h	mM	mM	mM	%	%	%
	Period 1	C1-1	0.2855	0.1972	70.6975	5.15201	-0.0163	0.0384456	51.2608	105.6	0	0	0	0	0	0
		C2-1	0.332	0.2281	72.3768	2.28535	-0.0059	0.0324208	21.6139	103.1	0	0	0	0	0	0
		C3-1	0.3092	0.2001	280.18	3.87597	-0.0104	0.0788909	52.594	58	0	0	0	0	0	0
		C4-1	0.3069	0.1951	309.603	2.49827	-0.0031	0.0754334	25.1445	108.9	0	0	0	0	0	0
		C5-1	0.2327	0.1982	285.238	7.46257	-0.0019	0.06988	15.5289	141.9	0	0	0	0	0	0
		C6-1	0.2613	0.1994	159.99	4.26236	-0.0012	0.0643523	8.5803	164.6	0	0	0	0	0	0
		C7-1	0.4082	0.2771	594.503	5.17522	-0.0027	0.0891708	19.8157	93.8	2.2	0	2.2	0.0685358	0	0.0685358
		C8-1	0.4023	0.3282	1359.69	7.59422	-0.0025	0.139909	23.3182	114.9	12.2	2.2	10	0.285047	0.0514019	0.233645
	Period 2	C1-2	0.1805	0.1656	47.8271	8.63583	-0.0028	0.0122788	16.3718	77.3	0	0	0	0	0	0
		C2-2	0.239	0.1706	85.3356	1.43872	-0.0058	0.0309091	20.6061	66.8	0	0	0	0	0	0
		C3-2	0.2083	0.1818	181.352	2.29118	-0.0074	0.0622838	41.5225	43.2	0	0	0	0	0	0
		C4-2	0.2143	0.1887	177.363	2.55174	-0.0035	0.0654967	21.8322	71.6	0	0	0	0	0	0
		C5-2	0.2088	0.1826	139.049	nm	-0.0025	0.0745087	16.5575	nm	0	0	0	0	0	0
		C6-2 Covid	0.1249	0.1167	151.73	nm	-0.0008	0.0743778	9.91705	nm	3.4	2.05	1.35	0.158879	0.0957944	0.0630841
		C7-2 Covid	0.1365	0.1281	168.824	nm	-0.0012	0.062802	13.956	nm	11.7	10.5	1.2	0.364486	0.327103	0.0373832
		C8-2 Covid	0.1307	0.1122	1080.78	nm	-0.0015	0.146773	24.4622	nm	21.65	19.7	1.9	0.505841	0.46028	0.0443925
		The NO2- and N2O showed transitory dynamics with appearance that peaked after a certain time, then reduced completely. The area under the curve (AUC) of the amount of NO2- or N2O by the time (mM-h) they appeared and then disappeared was calculated.
		The CO2 production rates were calculated from the linear portion of CO2 produced by the time, which occurred mainly during the first 5-15 h.
		The methanol consumption rates followed a first order dynamics, where a k factor was calculated as [ln(Ct/C0)]/time with Ct methanol concentration at the sampling time and C0 the initial methanol concentration
		nm: not measured
		C6-2, C7-2 and C8-2 are operating conditions post-Covid

## Sheet: Correlation Analysis
	Operating conditions
		Conditions	nitrate	methanol	C/N
			(mM)	(v/v, %)	ratio
		C1	10.7	0.075	1.5			NO3 RR and NOx RR: nitrate and NOx reduction rates							Pearson r
		C2	10.7	0.15	3			NO2 AUC: Area under the curve (non-linear regression, Gaussian model)								NOx RR	NO2 AUC	N2O AUC	MeOH CR	MeOH cons	CO2 PR	% MeOH cons
		C3	21.4	0.15	1.5			N2O AUC: Area under the curve (non-linear regression, Lognormal model)							NO3 RR	0.933****	0.313	0.07603	-0.2794	0.1291	0.2362	0.2743
		C4	21.4	0.3	3			MeOH CR: MeOH consumption rates, Ct/C0= e^Kx							NOx RR		0.4213	0.3275	-0.1267	0.209	0.2758	0.1385
		C5	21.4	0.45	4.5			MeOH consumed, and proportion of MeOH consumed: calculated from the initial MeOH concentration							NO2 AUC			0.4056	0.2727	0.900****	0.1871	-0.001637
		C6	21.4	0.75	7.5			CO2 PR: CO2 production rates							N2O AUC				0.2205	0.2032	0.3673	-0.2053
		C7	32.1	0.45	3										MeOH CR					0.3393	0.3756	-0.8899
		C8	42.8	0.6	3										MeOH cons						0.2149	-0.01371
															CO2 PR							-0.5318
	Measured parameters
			NO3 RR	NOx RR	NO2	N2O	MeOH CR	MeOH	Proportion	CO2 PR	Protein	pH
					AUC	AUC	k	consumed	MeOH consumed		content
			mM/h	mM/h	mM-h	mM-h	h-1	% (v/v)	%	ppmv/h	mg				Pearson r
		C1-1	0.2855	0.1972	70.6975	5.15201	-0.0163	0.0384456	51.2608	105.6	18.1857	7.84				NO3 RR	NOx RR	NO2 AUC	N2O AUC	MeOH CR	MeOH cons	CO2 PR	% MeOH cons
		C2-1	0.332	0.2281	72.3768	2.28535	-0.0059	0.0324208	21.6139	103.1	23.6475	7.71			iNitrate	0.597*	0.805***	0.910****	0.3054	0.41	0.962****	0.1919	-0.1241
		C3-1	0.3092	0.2001	280.18	3.87597	-0.0104	0.0788909	52.594	58	16.691	7.72			iMeOH	0.2992	0.4847	0.5178	0.2589	0.654*	0.660*	0.734**	-0.589*
		C4-1	0.3069	0.1951	309.603	2.49827	-0.0031	0.0754334	25.1445	108.9	13.7429	7.69			C/N	-0.03492	0.04193	0.007345	0.009379	0.598*	0.1906	0.808**	-0.701**
		C5-1	0.2327	0.1982	285.238	7.46257	-0.0019	0.06988	15.5289	141.9	10.3254	7.71
		C6-1	0.2613	0.1994	159.99	4.26236	-0.0012	0.0643523	8.5803	164.6	15.4611	7.69
		C7-1	0.4082	0.2771	594.503	5.17522	-0.0027	0.0891708	19.8157	93.8	15.2	7.97
		C8-1	0.4023	0.3282	1359.69	7.59422	-0.0025	0.139909	23.3182	114.9	15.3	7.62
		C1-2	0.1805	0.1656	47.8271	8.63583	-0.0028	0.0122788	16.3718	77.3	23.3589
		C2-2	0.239	0.1706	85.3356	1.43872	-0.0058	0.0309091	20.6061	66.8	24.5353	7.59
		C3-2	0.2083	0.1818	181.352	2.29118	-0.0074	0.0622838	41.5225	43.2	22.3467
		C4-2	0.2143	0.1887	177.363	2.55174	-0.0035	0.0654967	21.8322	71.6	23.61
		C5-2	0.2088	0.1826	139.049		-0.0025	0.0745087	16.5575		21.3956
		C6-2 Covid	0.1249	0.1167	151.73		-0.0008	0.0743778	9.91705		15.1444
		C7-2 Covid	0.1365	0.1281	168.824		-0.0012	0.062802	13.956		13.5
		C8-2 Covid	0.1307	0.1122	1080.78		-0.0015	0.146773	24.4622		16.8
	P1 +P2		NO3 RR vs. NOx RR	NO3 RR vs. NO2 AUC	NO3 RR vs. N2O	NO3 RR vs. MeOH CR	NO3 RR vs. MeOH	NO3 RR vs. CO2 PR	NO3 RR vs. MeOH prop	P1 +P2		N2O vs. MeOH CR	N2O vs. MeOH	N2O vs. CO2 PR	N2O vs. MeOH prop
		Pearson r									Pearson r
		r	0.933	0.313	0.07603	-0.2794	0.1291	0.2362	0.2743		r	0.2205	0.2032	0.3673	-0.2053
		R squared	0.8705	0.09797	0.00578	0.07804	0.01667	0.05578	0.07522		R squared	0.04862	0.04128	0.1349	0.04215
		P (two-tailed)	<0.0001	0.2378	0.8143	0.2947	0.6337	0.4599	0.304		P (two-tailed)	0.491	0.5265	0.2402	0.5221
		P value summary	****	ns	ns	ns	ns	ns	ns		P value summary	ns	ns	ns	ns
	P1 +P2		NOx RR vs. NO2 AUC	NOx RR vs. N2O	NOx RR vs. MeOH CR	NOx RR vs. MeOH	NOx RR vs. CO2 PR	NOx RR vs. MeOH prop		P1 +P2		MeOH CR vs. MeOH	MeOH CR vs. CO2 PR	MeOH CR vs. MeOH prop
		Pearson r									Pearson r
		r	0.4213	0.3275	-0.1267	0.209	0.2758	0.1385			r	0.3393	0.3756	-0.8899
		R squared	0.1775	0.1073	0.01606	0.04369	0.07609	0.01918			R squared	0.1151	0.1411	0.7919
		P (two-tailed)	0.1041	0.2987	0.6401	0.4372	0.3855	0.609			P (two-tailed)	0.1986	0.2289	<0.0001
		P value summary	ns	ns	ns	ns	ns	ns			P value summary	ns	ns	****
	P1 +P2		NO2 AUC vs. N2O	NO2 AUC vs. MeOH CR	NO2 AUC vs. MeOH	NO2 AUC vs. CO2 PR	NO2 AUC vs. MeOH prop			P1 +P2		MeOH vs. CO2 PR	MeOH vs. MeOH prop	P1 +P2	CO2 PR vs. MeOH prop
		Pearson r									Pearson r
		r	0.4056	0.2727	0.8998	0.1871	-0.001637				r	0.2149	-0.01371		-0.5318
		R squared	0.1645	0.07436	0.8096	0.03502	2.681e-06				R squared	0.04617	0.0001881		0.2828
		P (two-tailed)	0.1909	0.3069	<0.0001	0.5603	0.9952				P (two-tailed)	0.5024	0.9598		0.0751
		P value summary	ns	ns	****	ns	ns				P value summary	ns	ns		ns
	P1 + P2 C1-C5		Nitrate vs. NO3 RR	Nitrate vs. NOx RR	Nitrate vs. NO2 AUC	Nitrate vs. N2O	Nitrate vs. MeOH CR	Nitrate vs. MeOH	Nitrate vs. CO2 PR	Nitrate vs. MeOH prop					NO3- reduction rates	NOx reduction rates	NO2- dynamics	N2O dynamics	Methanol consumption rates	Methanol consumed	Proportion of methanol consumed	CO2 production rates
		Pearson r												i-NO3-	0.0312	0.0009	<0.0001	ns	ns	<0.0001	ns	ns
		r	0.597	0.8054	0.9101	0.3054	0.41	0.9619	0.1919	-0.1241				i-Methanol	ns	ns	ns	ns	0.0154	0.0142	0.0343	0.0065
		R squared	0.3565	0.6486	0.8284	0.09326	0.1681	0.9253	0.03682	0.0154				C/N	ns	ns	ns	ns	0.031	ns	0.0076	0.0015
		P (two-tailed)	0.0312	0.0009	<0.0001	0.3344	0.1641	<0.0001	0.5502	0.6862
		P value summary	*	***	****	ns	ns	****	ns	ns				NO3- reduction rates		<0.0001	ns	ns	ns	ns	ns	ns
														NOx reduction rates			ns	ns	ns	ns	ns	ns
														NO2- dynamics				ns	ns	<0.0001	ns	ns
														N2O dynamics					ns	ns	ns	ns
	P1 + P2 C1-C5		iMeOH vs. NO3 RR	iMeOH vs. NOx RR	iMeOH vs. NO2 AUC	iMeOH vs. N2O	iMeOH vs. MeOH CR	iMeOH vs. MeOH	iMeOH vs. CO2 PR	iMeOH vs. MeOH prop				Methanol consumption rates						ns	<0.0001	ns
		Pearson r												Methanol consumed							ns	ns
		r	0.2992	0.4847	0.5178	0.2589	0.6536	0.6596	0.7344	-0.5886				Proportion of methanol consumed								ns
		R squared	0.08951	0.2349	0.2681	0.06704	0.4271	0.435	0.5393	0.3464
		P (two-tailed)	0.3207	0.0932	0.0699	0.4164	0.0154	0.0142	0.0065	0.0343
		P value summary	ns	ns	ns	ns	*	*	**	*
	P1 + P2 C1-C5		C/N vs. NO3 RR	C/N vs. NOx RR	C/N vs. NO2 AUC	C/N vs. N2O	C/N vs. MeOH CR	C/N vs. MeOH	C/N vs. CO2 PR	C/N vs. MeOH prop
		Pearson r
		r	-0.03492	0.04193	0.007345	0.009379	0.5977	0.1906	0.8084	-0.7008
		R squared	0.001219	0.001758	5.395e-05	8.797e-05	0.3573	0.03633	0.6535	0.4911
		P (two-tailed)	0.9098	0.8918	0.981	0.9769	0.031	0.5328	0.0015	0.0076
		P value summary	ns	ns	ns	ns	*	ns	**	**

## Sheet: C1
																											Model (Gaussian distribution)
																										Y=Amplitude * e(-0.5*((X-Mean)/SD)^2)
	Condition 1
	NO3 and NOx reduction rates
	Period 1
	S1-Cycle 2
	Time (h)	mM NOx	mM NO3	mM NO2
	0	8.6012	8.5595	0.0417012
	1	7.78607	7.48248	0.303585
	3	8.17058	7.5396	0.630977												C1-1	C1-2
	5	7.68379	6.66401	1.01978												mM/h	mM/h
	7	7.4418	6.0003	1.4415											NO3 reduction rate	0.2855	0.1805
	11	6.36232	4.77433	1.58798											NOx reduction rate	0.1972	0.1656
	22	3.91553	1.85549	2.06004
	24	3.27337	1.01833	2.25505
	27	2.76675	0.412677	2.35407
	29	2.09609	0.179198	1.91689
	31	1.73561	0.0546721	1.68094
	33	1.66407	0.0591072	1.60496
	35	1.65758	0.227605	1.42997
	47	0.203992	0.0274392	0.176553
	Period 2
	S2-Cycle 3
	Time (h)	mM NOx	mM NO3	mM NO2
	0	8.44749	8.39904	0.0484586
	2	7.88744	7.76142	0.126025
	4	8.30379	7.91368	0.390108
	6	7.60033	7.09445	0.505888
	8	7.31293	6.75972	0.553209
	21	4.97751	4.01224	0.965269
	24	5.69844	4.36892	1.32952
	27	3.86524	2.7785	1.08674
	30	3.37508	2.33777	1.03731
	32	2.89336	1.92207	0.971286
	46	1.06829	0.238476	0.829813
	48	0.620608	-0.00171135	0.622319
	Nitrite dynamics
	Period 1		Period 2													Gaussian
	S1-Cycle 2		S2-Cycle 3													Best-fit values	C1-1	C1-2
	Time (h)	mM NO2	Time (h)	mM NO2												Amplitude	2.323	1.139
	0	0.0417012	0	0.0484586												Mean	22.05	29.82
	1	0.303585	2	0.126025												SD	12.14	16.75
	3	0.630977	4	0.390108													70.6975	47.8271
	5	1.01978	6	0.505888											Estimation time of complet reduction, 2 x Mean	Y=0	44.1	59.64
	7	1.4415	8	0.553209
	11	1.58798	21	0.965269
	22	2.06004	24	1.32952
	24	2.25505	27	1.08674
	27	2.35407	30	1.03731
	29	1.91689	32	0.971286
	31	1.68094	46	0.829813
	33	1.60496	48	0.622319
	35	1.42997
	47	0.176553
	Methanol consumption
																Methanol consumption rates
	Period 1					Period 2										First order dynamics
	S1-Cycle 2					S2-Cycle 3											C1-1	C1-2
	Time (h)	Methanol %v/v	Ct/C0	lnCt/C0			methanol %v/v									Ct/C0= e^Kx
	0	0.0791303	1	0		Time(h)	avec std int	lnCt/C0								K h-1	-0.0163	-0.0028
	7	0.0677903	0.856692	-0.154677		0	0.0844739	0
	11	0.0642154	0.811514	-0.208853		8	0.0796853	-0.0583579
	22	0.0523575	0.661661	-0.413002		21	0.0755292	-0.111923
	27	0.0480533	0.607268	-0.498785		32	0.0781605	-0.0776778
	31	0.0457652	0.578352	-0.547572		48	0.072195	-0.157071
	35	0.0436609	0.55176	-0.594643
	41	0.0406847	0.514148	-0.665244
	Total consumed	0.0384456				Total consumed	0.0122788
	N2O dynamics
	Period 1			Period 2										C1-1	C1-2
	S1-Cycle 2			S2-Cycle 3									Lognormal
	Time (h)	mM N2O		Time (h)	mM N2O								Best-fit values
	0	0.0409595		0	0.00771911								A	2.182	4.145
	1	0.0717813		2	0.125106								GeoMean	14.1	14.94
	3	0.160224		4	0.290376								GeoSD	2.565	2.296
	5	0.236778		6	0.360521								R squared	0.9238	0.9808
	7	0.27817		8	0.408026								Area under mM-h	5.15201	8.63583
	11	0.160315		21	0.193796
	22	0.0895562		24	0.144495
	24	0.0856239		27	0.0863058
	27	0.0631894		30	0.0971708
	29	0.054893		32	0.119151
	31	0.0492332		46	0.0202638
	33	0.0471875		48	0.0178681
	35	0.0408003
	47	0.0078464
	CO2 production
	Period 1			Period 2
	S1-Cycle 2			S2-Cycle 3
	Time (h)	ppm CO2		Time (h)	ppm CO2
	0	147.08		0	92.866									CO2 production rate linear portion during first hours
	1	412.93		2	306.319
	3	536.67		4	481.345									C1-1 ppmv/h	105.6
	5	771.163		6	608.968									C1-2 ppmv/h	77.3
	7	1049.31		8	714.385
	11	1341.11		21	1109.47
	22	1636.31		24	1286.3
	24	1764.21		27	1289.6
	27	1878.62		30	1285.32
	29	1843.52		32	1300.77
	31	1877.74		46	1316.59
	33	1805.32		48	1284.55
	35	1780.33
	47	1278.93

## Sheet: C2
	Condition 2
	NO3 and NOx reduction rates
	P1-Cycle 2
	Time (h)	mM NOx	mM NO3	mM NO2
	0	9.02131	9.20093	-0.179623
	19	6.98456	2.55429	4.43026
	21	5.46508	1.55058	3.91449											C2-1	C2-2
	23	5.17278	3.08274	2.09004											mM/h	mM/h
	24.5	4.07446	0.425702	3.64875										NO3 reduction rate	0.332	0.239
	26	2.61714	0.403336	2.2138										NOx reduction rate	0.2281	0.1706
	40	0.267717	0.63596	-0.368243
	44	-0.244409	0	-0.244409
	P2-Cycle 3
	Time (h)	mM NOx	mM NO3	mM NO2
	0	6.84696	6.84696	0
	2	7.32049	6.17645	1.14404
	4	6.87853	5.30773	1.5708
	7	6.97186	5.04078	1.93108
	17	4.45324	0.93658	3.51666
	19	5.03588	1.6054	3.43048
	22	5.14225	1.94649	3.19577
	24	3.31814	1.34192	1.97622
	26	2.92696	0.34425	2.58271
	28	2.37782	0.163492	2.21433
	31	2.04522	0.374869	1.67036
	43	0.186325	0.0770177	0.109307
	45	0.35306	0.0763756	0.276685
	47	0.555266	0.402733	0.152534
	Nitrite dynamics
	P1-Cycle 2			P2-Cycle 3
	Time (h)	mM NO2		Time (h)	mM NO2												C2-1	C2-2
	0	-0.179623		0	0											Gaussian
	19	4.43026		2	1.14404											Best-fit values
	21	3.91449		4	1.5708											Amplitude	4.208	3.367
	23	2.09004		7	1.93108											Mean	18.11	17.83
	24.5	3.64875		17	3.51666											SD	6.861	10.11
	26	2.2138		19	3.43048											Area mM h	72.3768	85.3356
	40	-0.368243		22	3.19577										Estimation time of complet reduction, 2 x Mean	Y=0	36.22	35.66
	44	-0.244409		24	1.97622
				26	2.58271
				28	2.21433
				31	1.67036
				43	0.109307
				45	0.276685
				47	0.152534
	N2O dynamics
	P1-Cycle 2			P2-Cycle 3
	Time (h)	mM N2O		Time (h)	mM N2O								Lognormal
	0	0.00567295		0	0.00420732								Best-fit values	C2-1	C2-2
	2	0.118651		3	0.0314129								A	0.9135	0.8023
	7	0.115673		5	0.0761228								GeoMean	10.36	12.6
	17	0.0585934		7	0.0794414								GeoSD	2.713	2.045
	19	0.0515516		8.5	0.0797368								R squared	0.9733	0.989
	26	0.0160156		21	0.0282307								Area under mM-h	2.28535	1.43872
	28	0.0110695		24	0.02298
	31	0.00910018		27	0.0186477
	43	0.00464738		29	0.0153337
	45	0.00279102		45.5	0.00361407
	47	0.00303741
	Methanol consumption
	P1-Cycle 2				P2-Cycle 3
	Time (h)	% methanol	lnCt/C0		Time (h)	% methanol	lnCt/C0									Methanol consumption rates
	0	0.152057	0		0	0.149176	0									First order dynamics
	4	0.145944	-0.0410269		8.5	0.149545	0.00247037									Ct/C0= e^Kx	C2-1	C2-2
	7	0.146105	-0.0399283		21	0.129432	-0.141976									K (h-1)	-0.0059	-0.0058
	17	0.132407	-0.138373		29	0.123261	-0.190824
	22	0.12783	-0.173554		45.5	0.118267	-0.232182
	26	0.128491	-0.168395
	31	0.122868	-0.213139
	43	0.119665	-0.239558
	47	0.119636
	Total consumed	0.0324208			Total consumed	0.0309091
	CO2 production
	Time (h)	ppm CO2		Time (h)	ppm CO2									CO2 production rate linear portion during first hours
	0	158.63		0	87.623
	2	541.3		3	261.751									C2-1 ppmv/h	103.1
	7	924.61		5	447.399									C2-2 ppmv/h	66.8
	17	1130.88		7	578.214
	19	1339.94		8.5	627.343
	26	1130.2		21	953.884
	28	1006.35		24	1032.89
	31	1011.15		27	1103.38
	43	865.832		29	1107.84
	45	948.107		45.5	1119.15
	47	949.543

## Sheet: C3
	Condition 3
	NO3 and NOx reduction rates
	Period 1
	Cycle 2
	Time (h)	mM NOx	mM NO3	mM NO2
	0			0
	2	15.9404	15.3377	0.602709
	4	15.0053	14.1075	0.897848											C3-1	C3-2
	6	14.8162	13.5688	1.2474											mM/h	mM/h
	8	15.2599	13.5963	1.66363										NO3 reduction rate	0.3092	0.2083
	22	13.4601	9.53534	3.9248										NOx reduction rate	0.2001	0.1818
	25	12.4437	8.08974	4.35394
	27	11.7633	7.07946	4.68379
	29	12.2171	6.82807	5.38908
	44	8.40169	1.98896	6.41273
	46	7.08322	1.15334	5.92989
	48	6.92666	0.782629	6.14403
	50	6.29954	0.741597	5.55795
	52		5.44552	5.6008
	54		4.01668	4.52021
	66	2.92051	1.6556	1.26491
	Period 2
	Cycle 3
	Time (h)	mM NOx	mM NO3	mM NO2
	0	15.945	15.9223	0.0227283
	2	15.3123	15.1988	0.113467
	4	14.3947	13.7434	0.651252
	6	14.2884	13.6214	0.666987
	8	13.224	12.149	1.07505
	22.5	10.8633	8.83406	2.02929
	24.5	10.4987	8.34666	2.15202
	26.5	10.8914	8.5593	2.3321
	29.5	10.0904	7.76632	2.32405
	48.5	6.6198	3.97808	2.64172
	52	5.90107	3.1978	2.70327
	55	4.89309	2.31343	2.57966
	57	4.88	2.36118	2.51882
	71.5	2.32701	0.405601	1.92141
	75	2.07206	0.304848	1.76721
	Nitrite dynamics
	Period 1			Period 2
	Cycle 2			Cycle 3											C3-1	C3-2
	Time (h)	mM NO2		Time (h)	mM NO2									Gaussian
	0	0		0	0.0227283									Best-fit values
	2	0.602709		2	0.113467									Amplitude	6.625	2.865
	4	0.897848		4	0.651252									Mean	39.66	46.71
	6	1.2474		6	0.666987									SD	16.87	25.25
	8	1.66363		8	1.07505									Area mM h	280.18	181.352
	22	3.9248		22.5	2.02929								Estimation time of complet reduction, 2 x Mean	Y=0	79.32	93.42
	25	4.35394		24.5	2.15202
	27	4.68379		26.5	2.3321
	29	5.38908		29.5	2.32405
	44	6.41273		48.5	2.64172
	46	5.92989		52	2.70327
	48	6.14403		55	2.57966
	50	5.55795		57	2.51882
	52	5.6008		71.5	1.92141
	54	4.52021		75	1.76721
	66	1.26491
	N2O dynamics
	Period 1			Period 2
	Cycle 2			Cycle 3
	Time (h)	mM N2O		Time (h)	mM N2O									C3-1	C3-2
	0	0.00453009		0	0.00231164								Lognormal
	2	0.0267759		2	0.00907154								Best-fit values
	4	0.0328903		4	0.030731								A	1.99	1.152
	6	0.0298218		6	0.0422096								GeoMean	33.81	23.84
	8	0.0305946		8	0.0477785								GeoSD	2.175	2.211
	22	0.0563022		22.5	0.0459601								R squared	0.3379	0.9253
	25	0.0714859		24.5	0.0548702								Area under mM-h	3.87597	2.29118
	27	0.0859194		26.5	0.0513925
	29	0.104172		29.5	0.0385274
	44	0.0250485		48.5	0.0100898
	46	0.0229573		52	0.00862831
	48	0.0170248		55	0.00811461
	50	0.0147859		57	0.00865104
	52	0.0137048		71.5	0.00406594
	54	0.109809
	66	0.00432325
	Methanol consumption
	Period 1				Period 2											Methanol consumption rates
	Cycle 2				Cycle 3											First order dynamics
	Time (h)	avec std int	lnCt/C0		Time(h)	avec std int	lnCt/C0										C3-1	C3-2
	0	0.166748	0		0	0.153174	0									Ct/C0= e^Kx
	4	0.156559	-0.0630514		8	0.140677	-0.0851111									K h-1	-0.0104	-0.0074
	8	0.153689	-0.0815539		22.5	0.126884	-0.188304
	29	0.122555	-0.30792		29.5	0.121566	-0.231124
	44	0.105473	-0.458028		48.5	0.104389	-0.383452
	48	0.102102	-0.490507		57	0.0974673	-0.452061
	54	0.0851895	-0.671605		71.5	0.0908907	-0.52192
	66	0.0878569	-0.640774
	Total consumed	0.0788909			Total consumed	0.0622838
	CO2 production
	Period 1			Period 2
	Cycle 2			Cycle 3
	Time (h)	ppm CO2		Time (h)	ppm CO2
	0	206.262		0	49.338										CO2 production rate linear portion during first hours
	2	279.859		2	205.321
	4	305.028		4	279.733										C3-1 ppmv/h	58
	6	376.784		6	392.715										C3-2 ppmv/h	43.2
	8	504.092		8	529.408
	22	1315.21		22.5	1083.14
	25	1543.4		24.5	1196.06
	27	1686.01		26.5	1223.67
	29	1871.92		29.5	1379.35
	44	2290.5		48.5	1704.72
	46	2309.82		52	1768.74
	48	2193.01		55	1800.45
	50	2008.91		57	1833.53
	52	2001.28		71.5	1820.67
	54	1890.75
	66	1268.1

## Sheet: C4
	Condition 4
	NO3 and NOx reduction rates
	Period 1
	Cycle 2
	Time (h)	mM NOx	mM NO3	mM NO2
	0	16.2215	15.9287	0.292762
	2	15.0363	14.143	0.89337											C4-1	C4-2
	4	16.0241	14.6545	1.36951											mM/h	mM/h
	6	16.2481	14.2901	1.95806										NO3 reduction rate	0.3069	0.2143
	8	12.831	10.8011	2.02993										NOx reduction rate	0.1951	0.1887
	10	13.2098	10.7558	2.45399
	25	13.0524	8.4208	4.63159
	27	11.3185	6.22129	5.09718
	29	10.1207	4.82312	5.29761
	31	8.39215	3.35395	5.03821
	33	9.7043	4.21467	5.48963
	35	9.63219	3.8173	5.8149
	52	5.7105	0.888963	4.82154
	54	5.1992	0.587595	4.61161
	72	2.20288	0.21839	1.98449
	Period 2
	Cycle 3
	Time (h)	mM NOx	mM NO3	mM NO2
	0	16.6011	16.5274	0.0737206
	2.5	15.4919	15.2674	0.22445
	5.5	14.9793	14.2442	0.73513
	7.5	14.9971	14.0906	0.906452
	10	14.1518	13.0788	1.07293
	23	12.5398	10.6558	1.88403
	26.5	11.6886	9.53443	2.15417
	56	5.04044	2.83194	2.2085
	73	2.82385	0.867134	1.95671
	Nitrite dynamics
	Period 1			Period 2
	Cycle 2			Cycle 3										C4-1	C4-2
	Time (h)	mM NO2		Time (h)	mM NO2								Gaussian
	0	0.292762		0	0.0737206								Best-fit values
	2	0.89337		2.5	0.22445								Amplitude	5.831	2.738
	4	1.36951		5.5	0.73513								Mean	39.57	47.68
	6	1.95806		7.5	0.906452								SD	21.18	25.84
	8	2.02993		10	1.07293								Area mM h	309.603	177.363
	10	2.45399		23	1.88403							Estimation time of complet reduction, 2 x Mean	Y=0	79.14	95.36
	25	4.63159		26.5	2.15417
	27	5.09718		56	2.2085
	29	5.29761		73	1.95671
	31	5.03821
	33	5.48963
	35	5.8149
	52	4.82154
	54	4.61161
	72	1.98449
	N2O dynamics
	Period 1			Period 2
	Cycle 2			Cycle 3
	Time (h)	mM N2O		Time (h)	mM N2O									C4-1	C4-2
	0	0.00685764		0	0.00109104								Lognormal
	2	0.024134		2.5	0.0848511								Best-fit values
	4	0.0276851		5.5	0.153041								A	0.6669	1.093
	6	0.0262531		7.5	0.116037								GeoMean	67.23	12.9
	8	0.0289807		10	0.0880787								GeoSD	4.457	2.538
	10	0.0292308		23	0.0465965								R squared	0.797	0.9538
	25	0.0193091		26.5	0.0327767								Area under mM-h	2.49827	2.55174
	27	0.0216981		28	0.0268214
	29	0.0247302		30	0.0324357
	31	0.0246507		49	0.00566886
	33	0.0202002
	35	0.0185954
	52	0.00795323
	54	0.00963979
	72	0.00337086
	Methanol consumption
	Period 1				Period 2
	Cycle 2	Methanol %			Cycle 3	Methanol %									Methanol consumption rates
	Time (h)	avec std int	lnCt/Co		Time(h)	avec std int	lnCt/Co								First order dynamics
	0	0.33574	0		0	0.317314	0									C4-1	C4-2
	4	0.302715	-0.103544		10	0.297823	-0.0633935								Ct/C0= e^Kx
	10	0.310969	-0.0766432		23	0.23143	-0.315614								K h-1	-0.0031	-0.0035
	25	0.293297	-0.13515		55	0.203635	-0.443563
	29	0.300403	-0.111213		56	0.258458	-0.205158
	35	0.281878	-0.174863		73	0.251817	-0.231188
	52	0.270924	-0.214498
	72	0.260307	-0.254477
	Total consumed	0.0754334			Total consumed	0.0654967
	CO2 production
	Period 1			Period 2
	Cycle 2			Cycle 3
	Time (h)	ppm CO2		Time (h)	ppm CO2
	0	548.574		0	13.859										CO2 production rate linear portion during first hours
	2	709.347		2.5	347.937
	4	994.672		5.5	545.442										C4-1 ppmv/h	108.9
	6	1186.51		7.5	617.702										C4-2 ppmv/h	71.6
	8	1442.68		10	768.478
	10	1594.94		23	1413.35
	25	2802.98		26.5	1496.45
	27	2861.3		28	1450.88
	29	2981.64		30	1407.57
	31	3216.96		49	2223.63
	33	3298.66
	35	3447.41
	52	2557.47
	54	2380.09
	72	1710.24

## Sheet: C5
	Condition 5
	NO3 and NOx reduction rates
	Period 1
	Cycle 2
	Time (h)	mM NOx	mM NO3	mM NO2
	0	15.5728	15.1485	0.424239
	2	15.8132	15.0964	0.716777
	4	16.3528	15.114	1.23881
	6	16.5153	14.8928	1.6225
	7.5	15.3113	13.6121	1.69917
	9	15.0834	13.3018	1.78164
	22.5	12.8044	8.96118	3.8432
	24.5	12.1506	7.80342	4.34718
	26.5	10.8769	6.6541	4.2228
	29	10.7253	6.29054	4.43475
	30.5	11.8244	6.87115	4.95321
	72	2.10605	0.339072	1.76698
															C5-1	C5-2
															mM/h	mM/h
														NO3 reduction rate	0.2327	0.2088
	Period 2													NOx reduction rate	0.1982	0.1826
	Cycle 3
	Time (h)	mM NOx	mM NO3	mM NO2
	0	15.696	15.8157	-0.119723
	2.5	15.158	15.0977	0.0602973
	4.5	13.7429	13.1404	0.60245
	6.5	13.9492	13.2342	0.715028
	9	13.6815	12.813	0.86856
	22	11.1296	9.42492	1.70471
	26	9.62997	7.6717	1.95827
	29	9.99027	7.98809	2.00218
	32.5	9.20282	7.22225	1.98057
	47	6.43503	4.43337	2.00166
	50	5.9474	3.83472	2.11267
	54	5.70199	3.5034	2.19859
	73	1.99597	0.597108	1.39886
	Nitrite dynamics
	Period 1			Period 2
	Cycle 2			Cycle 3
	Time (h)	mM NO2		Time (h)	mM NO2									C5-1	C5-2
	0	0.424239		0	-0.119723								Gaussian
	2	0.716777		2.5	0.0602973								Best-fit values
	4	1.23881		4.5	0.60245								Amplitude	5.465	2.314
	6	1.6225		6.5	0.715028								Mean	40.46	44.76
	7.5	1.69917		9	0.86856								SD	20.82	23.97
	9	1.78164		22	1.70471								Area mM h	285.238	139.049
	22.5	3.8432		26	1.95827							Estimation time of complet reduction, 2 x Mean	Y=0	80.92	89.52
	24.5	4.34718		29	2.00218
	26.5	4.2228		32.5	1.98057
	29	4.43475		47	2.00166
	30.5	4.95321		50	2.11267
	72	1.76698		54	2.19859
				73	1.39886
	N2O dynamics
	Period 1
	Cycle 2													C5-1
	Time (h)	mM N2O											Lognormal
	0	0.00486195											Best-fit values
	2	0.0301854											A	1.688
	4	0.03755											GeoMean	194
	6	0.0432325											GeoSD	5.834
	7.5	0.0361634											R squared	0.6591
	9	0.0408231											Area under mM-h	7.46257
	22.5	0.0370272
	24.5	0.0274806
	26.5	0.0328903
	29	0.0352315
	30.5	0.0372772
	56	0.0388683
	72	0.00352997
	CO2 production
	Period 1
	Cycle 2
	Time (h)	ppm CO2											CO2 production rate linear portion during first hours
	0	129.853
	2	531.375											C5-1 ppmv/h	141.9
	4	736.336
	6	1081.63
	7.5	1201.76
	9	1455.68
	22.5	2778.61
	24.5	2663.23
	26.5	2522.21
	29	2545.14
	30.5	2598.16
	56	2602.81
	72	1590.08
	Methanol consumption
	Period 1				Period 2
	Cycle 2	methanol %			Cycle 3	methanol %										Methanol consumption rates
	Time (h)	avec std int	lnCt/Co		Time(h)	avec std int	lnCt/Co									First order dynamics
	0	0.598224	0		0	0.43582	0										C5-1	C5-2
	4	0.568927	-0.0502125		9	0.414779	-0.0494842									Ct/C0= e^Kx
	24	0.591254	-0.0117194		22	0.396546	-0.0944386									K h-1	-0.0019	-0.0025
	26	0.605935			32.5	0.384822	-0.124448
	30.5	0.588033			47	0.375784	-0.148215
	51.5	0.587917			54	0.371845	-0.158753
	53.5	0.528344	-0.124218		73	0.361311	-0.187489
	Total consumed	0.06988
					Total consumed	0.0745087

## Sheet: C6
	Condition 6
	NO3 and NOx reduction rates
	Period 1
	Cycle 2
	Time (h)	mM NOx	mM NO3	mM NO2
	0	11.9769	11.9259	0.051051
	2	13.346	12.9507	0.395305
	4	12.5576	11.7939	0.763724
	6	12.4188	11.6025	0.816306
	8	12.0422	11.0319	1.0103
	24	8.92222	5.98508	2.93714
	29	8.05714	4.79361	3.26352												C6-1	C6-2
	31	7.38424	4.06677	3.31747												mM/h	mM/h
	50	3.25673	0.35363	2.9031											NO3 reduction rate	0.2613	0.1249
	53	2.53929	0.0934324	2.44586											NOx reduction rate	0.1994	0.1167
	55	2.10882	-0.0189864	2.12781
	73	0.050506	-0.0832477	0.133754
	Period 2
	Cycle 3
	Time (h)	mM NOx	mM NO3	mM NO2
	0	14.7772	14.5857	0.191502
	2.5	14.2251	14.0169	0.208207
	4	14.1434	13.8844	0.25901
	6	13.2896	12.9697	0.319974										NOx residual after 96 h: 3.4 mM (2.05 mM NO3 + 1.35 mM NO2)
	8	13.1841	12.7237	0.460329
	24	11.5774	10.6156	0.961816
	26	11.6069	10.6396	0.967327
	28	11.6732	10.5874	1.08581
	30.5	11.4731	10.3329	1.14023
	49.5	8.99183	7.64236	1.34947
	53.5	8.57475	7.20789	1.36686
	56.5	8.40166	6.9468	1.45487
	72	7.15535	5.46954	1.6858
	76	5.82586	4.26405	1.56181
	103	1.6014	0.54848	1.05292
	118	0.708322	0.0279041	0.680418
	Nitrite dynamics
	Period 1			Period 2
	Cycle 2			Cycle 3
	Time (h)	mM NO2		Time (h)	mM NO2			C6-1	C6-2
	0	0.051051		0	0.191502		Gaussian
	2	0.395305		2.5	0.208207		Best-fit values
	4	0.763724		4	0.25901		Amplitude	3.704	1.608
	6	0.816306		6	0.319974		Mean	36.93	67.76
	8	1.0103		8	0.460329		SD	17.23	37.64
	24	2.93714		24	0.961816		Area mM h	159.99	151.73
	29	3.26352		26	0.967327	Estimation time of complet reduction, 2 x Mean	Y=0	73.86	135.52
	31	3.31747		28	1.08581
	50	2.9031		30.5	1.14023
	53	2.44586		49.5	1.34947
	55	2.12781		53.5	1.36686
	73	0.133754		56.5	1.45487
				72	1.6858
				76	1.56181
				103	1.05292
				118	0.680418
	N2O dynamics
	Period 1
	Cycle 2
	Time (h)	mM N2O
	0	0.00925793									Lognormal
	2	0.135494									Best-fit values
	4	0.170748									A	1.268
	6	0.114946									GeoMean	20.63
	8	0.00272078									GeoSD	3.823
	24	0.0625075									R squared	0.9537
	29	0.0503924									Area under mM-h	4.26236
	31	0.0479376
	50	0.00991028
	53	0.012156
	55	0.0113582
	73	0.00314811
	Methanol consumption
	Period 1				Period 2											Methanol consumption rates
	Cycle 2	methanol %			Cycle 3	methanol %										First order dynamics
	Time (h)	avec std int	LnCt/Co		Time(h)	avec std int	LnCt/Co										C6-1	C6-2
	0	0.781687	0		0	0.747383	0									Ct/C0= e^Kx
	8	0.755521	-0.0340466		24	0.739	-0.0112799									K h-1	-0.0012	-0.0008
	24	0.725575	-0.0744901		49.5	0.707791	-0.0544289
	31	0.755123	-0.0345737		72	0.694886	-0.0728303
	50	0.708152	-0.0987953		103	0.70389	-0.0599567
	55	0.712057	-0.0932961		118	0.673006	-0.104825
	73	0.717334	-0.0859118
	Total consumed	0.0643523			Total consumed	0.0743778
	CO2 production
	Period 1
	Cycle 2												CO2 production rate linear portion during first hours
	Time (h)	ppm CO2
	0	605.476											C6-1 ppmv/h	164.6
	2	1002.53
	4	1247.83
	6	1620.97
	24	3369.46
	29	3387.49
	31	3271.36
	50	3201.89
	53	3234.86
	55	3086.11
	73	2674.18

## Sheet: C7
	Condition 7
	NO3 and NOx reduction rates
	Period 1
	Cycle 2
	Time (h)	mM NOx	mM NO3	mM NO2
	0	30.3959	29.4652	0.930762
	2	24.2061	23.4308	0.775365
	4	23.6179	22.8685	0.749466
	6	26.8984	24.2097	2.68869
	8	26.2787	23.4897	2.78905
	23	20.0644	16.0095	4.05489
	25	20.7716	15.9818	4.78978
	27	21.3143	15.6876	5.62666										NOx residual after 96 h: 2.2 mM (0 mM NO3 + 2.2 mM NO2)
	30	17.6662	11.7223	5.94393
	32	17.9113	12.3154	5.59591
	47	14.1232	7.1044	7.01876
	49	14.5433	6.44645	8.09682
	52	13.5385	4.94471	8.59377
	54	11.816	4.22581	7.59017
	56	11.6549	3.51764	8.13729
	58	11.1228	2.84627	8.2765											C7-1	C7-2
	71	6.89703	-1.18199	8.07902											mM/h	mM/h
	73	6.02177	-0.898246	6.92002										NO3 reduction rate	0.4082	0.1365
	76	4.93995	-0.853436	5.79339										NOx reduction rate	0.2771	0.1281
	78	5.89924	0.572037	5.3272
	97	2.19515	-1.21064	3.40578
	Period 2
	Cycle 3
	Time (h)	mM NOx	mM NO3	mM NO2
	0	24.7203	24.5267	0.193641
	2.5	23.9108	23.6949	0.215924
	4	23.8737	23.5653	0.308339
	6	22.5937	22.1487	0.444976										NOx residual after 96 h: 11.7 mM (10.5 mM NO3 + 1.2 mM NO2)
	8	22.8033	22.3773	0.425975
	11	22.9402	22.4025	0.537737
	25.5	20.4029	19.5277	0.875269
	28	20.1751	19.2795	0.895652
	54	16.9584	15.8988	1.05958
	57	15.56	14.4553	1.10467
	75.5	14.164	12.9155	1.24856
	78.5	13.9499	12.662	1.28794
	98	12.4166	11.0834	1.3332
	102	10.7108	9.51283	1.19801
	106	10.4863	9.33727	1.14902
	120	8.70298	7.62699	1.07599
	Nitrite dynamics
	Period 1			Period 2
	Cycle 2			Cycle 3
	Time (h)	mM NO2		Time (h)	mM NO2
	0	0.930762		0	0.193641										C7-1	C7-2
	2	0.775365		2.5	0.215924									Gaussian
	4	0.749466		4	0.308339									Best-fit values
	6	2.68869		6	0.444976									Amplitude	8.141	1.313
	8	2.78905		8	0.425975									Mean	55.56	83.7
	23	4.05489		11	0.537737									SD	29.13	51.29
	25	4.78978		25.5	0.875269									Area mM h	594.503	168.824
	27	5.62666		28	0.895652								Estimation time of complet reduction, 2 x Mean	Y=0	111.12	167.4
	30	5.94393		54	1.05958
	32	5.59591		57	1.10467
	47	7.01876		75.5	1.24856
	49	8.09682		78.5	1.28794
	52	8.59377		98	1.3332
	54	7.59017		102	1.19801
	56	8.13729		106	1.14902
	58	8.2765		120	1.07599
	71	8.07902
	73	6.92002
	76	5.79339
	78	5.3272
	97	3.40578
	N2O dynamics
	Period 1
	Cycle 2
	Time (h)	mM N2O
	0	0.00535064
	2	0.0317084								Lognormal
	4	0.0766456								Best-fit values
	6	0.0933067								A	1.331
	8	0.0846011								GeoMean	63.68
	23	0.0325721								GeoSD	4.717
	25	0.023912								R squared	0.455
	27	0.0193523								Area under mM-h	5.17522
	30	0.0167475
	32	0.0171021
	47	0.0230028
	49	0.0224072
	52	0.0357088
	54	0.0395957
	56	0.0643259
	58	0.0487104
	71	0.01532
	73	0.0206388
	76	0.0208889
	78	0.0264577
	97
	Methanol consumption
	Period 1				Period 2
	Cycle 2	Methanol %			Cycle 3	Methanol %
	Time (h)	avec std int	lnCt/Co		Time(h)	avec std int
	0	0.489153	0		0	0.47188	0									Methanol consumption rates
	8	0.391468			25.5	0.455963	-0.0343131									First order dynamics
	23	0.468253	-0.0436662		54	0.446987	-0.0541951										C7-1	C7-2
	32	0.474665	-0.0300657		75.5	0.432622	-0.0868603									Ct/C0= e^Kx
	47	0.363492			98	0.414578	-0.129464									K h-1	-0.0027	-0.0012
	58	0.312096			120	0.409078	-0.142819
	71	0.375744	-0.263768
	78	0.40094	-0.198864
	97	0.399982	-0.201255
	Total consumed	0.0891708			Total consumed	0.062802
	CO2 production
	Period 1
	Cycle 2
	Time (h)	ppm CO2
	0	168.132
	2	387.631
	4	542.116
	6	752.742												CO2 production rate linear portion during first hours
	8	923.363
	23	2197.78												C7-1 ppmv/h	93.8
	25	2326.38
	27	2339.36
	30	2330.15
	32	2838.68
	47	2867.28
	49	3167.24
	52	3359.99
	54	3581.85
	56	3710.92
	58	3895.46
	71	3043.24
	73	2866.29
	76	2391.65
	78	2078.85
	97

[truncated: 1 more sheets: C8]
