# Supplementary material for: Modulation of carbon-to-nitrogen ratio shapes the microbial ecology in a methanol-fed recirculating marine denitrifying reactor
Source: PeerJ. 2025 Oct 13;13:e20129. doi: 10.7717/peerj.20129 (PMC12530212; doi:10.7717/peerj.20129)
Supplement: Supplemental Information 3 [file peerj-13-20129-s003.xlsx]

## Sheet: Feuil1
Accession numbers
								The resulting assembled sequences (contigs) were annotated at the Joint Genomic Institute
								(https://img.jgi.doe.gov/cgi-bin/m/main.cgi) to find open reading frames with their
Raw sequencing data were deposited in Sequence Read Archive (SRA) at the National Center								putative function and affiliation
for Biotechnology Information (NCBI: https://www.ncbi.nlm.nih.gov/)
Transcriptome/Metatranscriptome				16S rRNA gene amplicon sequences				Assembled contigs from metatranscriptome
Recirculating reactor biofilm samples:				Recirculating reactor biofilm samples:				Joint Genome Institute (JGI) IMG/MER
Bioproject #	PRJNA1194547			Bioproject #	PRJNA1194547			GOLD IDs in IMG Database	Analysis ID
									Ga0510009	Condition1
BioSample #	SAMN45188687 : Condition1 (TaxID: 1076179)	Condition1		BioSample #	SAMN45195935 : D0 (TaxID: 1076179)	D0			Ga0510008	Condition4
	SAMN45188688 : Condition4 (TaxID: 1076179)	Condition4			SAMN45195936 : Condition5-1 (TaxID: 1076179)	Condition5-1			Ga0510007	Condition6
	SAMN45188689 : Condition6 (TaxID: 1076179)	Condition6			SAMN45195937 : Condition5-2 (TaxID: 1076179)	Condition5-2			Ga0510006	Condition8
	SAMN45188690 : Condition8 (TaxID: 1076179)	Condition8			SAMN45195938 : Condition6-2 (TaxID: 1076179)	Condition6-2			Ga0510010	Original biofilm
Original biofilm metatranscriptome				Bioproject #	PRJNA524642
Bioproject #	PRJNA744510
				BioSample #	SAMN11029470 : OB (TaxID: 718308)	Original biofilm
BioSample #	SAMN20104466 : Biodome Original Biofilm (TaxID: 718308)	Original biofilm
ASW static-batch biofilm culture: metatranscriptomes
Bioproject #	PRJNA525230
BioSample #	SAMN11029462 : 30023	300N23C
	SAMN11029465 : 90030	900N30C
	SAMN11029466 : 0%	0%NaCl
Planktonic culture transcriptomes
Bioproject #	PRJNA1072961
BioSample #	SAMN39755719 : GP59-Orep1 (TaxID: 754476)	PlkO
	SAMN39755720 : GP59-Orep2 (TaxID: 754476)	PlkO
	SAMN39755721 : GP59-Orep3 (TaxID: 754476)	PlkO
	SAMN39755722 : GP59-Orep3bis (TaxID: 754476)	PlkO
	SAMN39755723 : GP59-ONrep1 (TaxID: 754476)	PlkON
	SAMN39755724 : GP59-ONrep2 (TaxID: 754476)	PlkON
	SAMN39755725 : GP59-ONrep3 (TaxID: 754476)	PlkON
Bioproject #	PRJNA525230
BioSample #	SAMN11043171 : GP59rep1 (TaxID: 754476)	PlkAN
	SAMN11043172 : GP59rep2 (TaxID: 754476)	PlkAN
	SAMN11043173 : GP59rep3 (TaxID: 754476)	PlkAN
