# Supplementary material for: Modulation of carbon-to-nitrogen ratio shapes the microbial ecology in a methanol-fed recirculating marine denitrifying reactor
Source: PeerJ. 2025 Oct 13;13:e20129. doi: 10.7717/peerj.20129 (PMC12530212; doi:10.7717/peerj.20129)
Supplement: Supplemental Information 4 [file peerj-13-20129-s004.xlsx]

## Sheet: 16S affiliations
Proportion of taxa derived from amplicon 16S sequencing of the biofilm samples
A: Amount of reads per taxon per sample								B: Percentage of each taxon in the biofilm samples
	Sample name	OB	D0	C5-1	C5-2	C6-2		OB	D0	C5-1	C5-2	C6-2
	C/N	C/N=0.86*	C/N=3	C/N=4.5	C/N=4.5	C/N=7.5		C/N=0.86	C/N=3	C/N=4.5	C/N=4.5	C/N=7.5
	Total reads =>	423208	31877	31524	27268	33031		0.0004	0.003	0.0045	0.0045	0.0075	Methanol
								10 mM	21.4 mM	21.4 mM	21.4 mM	21.4 mM	Nitrate			Taxon	OB	D0	C5-1	C5-2	C6-2
Lineage	Taxon														Others	Others	5.99823	13.6242	10.6173	10.8809	6.10033
Bacillota; Bacilli; Lactobacillales; Carnobacteriaceae	Alkalibacterium	0	122	5	4	3		0	0.382721	0.0158609	0.0146692	0.00908238			Rhodobacterales	Other Rhodobacterales	4.49141	3.89309	8.20327	4.26141	4.84696
Bacillota; Clostridia	Clostridiales	7515	5	14	14	28		1.77572	0.0156853	0.0444106	0.0513422	0.0847689			Alphaproteobacteria; Rhodobacterales	Paracoccaceae	0.757075	0.574082	4.73925	1.99868	1.7862
Bacteroidota; Bacteroidia; Marinilabiliales	Marinilabiliaceae	70	0	96	123	30		0.0165403	0	0.30453	0.451078	0.0908238			Bacteroidota; Flavobacteriia; Flavobacteriales; Flavobacteriaceae	Muricauda	0.0604903	0.304295	6.5347	3.61963	2.04051
Bacteroidota; Bacteroidia; Marinilabiliales; Prolixibacteraceae	Sunxiuqinia	177	0	8	34	6		0.0418234	0	0.0253775	0.124688	0.0181648			Gammaproteobacteria; Oceanospirillales; Alcanivoracaceae	Marinicella	0.851118	4.66167	25.8057	12.2084	13.4056
Bacteroidota; Flavobacteriia; Flavobacteriales	Cryomorphaceae	0	5	76	14	0		0	0.0156853	0.241086	0.0513422	0			Alphaproteobacteria; Hyphomicrobiales	Stappiaceae	0.0344984	2.62258	9.97335	18.9196	19.7421
Bacteroidota; Flavobacteriia; Flavobacteriales; Flavobacteriaceae	Aequorivita	1594	107	31	20	19		0.376647	0.335665	0.0983378	0.073346	0.0575217			Alphaproteobacteria; Rhodobacterales; Roseobacteraceae	Roseovarius	11.9799	0	0.402868	0	0.193757
Bacteroidota; Flavobacteriia; Flavobacteriales; Flavobacteriaceae	Winogradskyella	1091	46	23	0	0		0.257793	0.144305	0.0729603	0	0			Rhodospirillales-Oceanibaculum	Oceanibaculaceae	11.6621	2.72924	7.23576	9.85771	6.53628
Bacteroidota; Flavobacteriia; Flavobacteriales; Flavobacteriaceae	Muricauda	256	97	2060	987	674		0.0604903	0.304295	6.5347	3.61963	2.04051			Hyphomicrobiales	Other Hyphomicrobiales	17.0977	2.73238	3.21025	6.80285	7.54443
Bacteroidota; Flavobacteriia; Flavobacteriales; Flavobacteriaceae	Maribacter	0	99	134	141	105		0	0.310569	0.425073	0.51709	0.317883			Alphaproteobacteria; Hyphomicrobiales	Hyphomicrobium	43.33	0	0.707398	2.21138	1.70143
Bacteroidota; Flavobacteriia; Flavobacteriales; Flavobacteriaceae	Vitellibacter	0	0	77	29	47		0	0	0.244258	0.106352	0.142291			Gammaproteobacteria; Thiotrichales; Piscirickettsiaceae	Methylophaga	3.73741	68.8584	22.5701	29.2394	36.1024
Bacteroidota; Bacteroidia; Marinilabiliales; Prolixibacteraceae	Mariniphaga	82	0	16	50	26		0.0193758	0	0.050755	0.183365	0.0787139
Bacteroidota; Flavobacteriia; Flavobacteriales	Flavobacteriaceae	1561	878	900	510	304		0.368849	2.75434	2.85497	1.87032	0.920348
Campylobacterota; Epsilonproteobacteria; Campylobacterales; Sulfurimonadaceae	Sulfurimonas	0	21	0	0	0		0	0.0658782	0	0	0
Campylobacterota; Epsilonproteobacteria; Campylobacterales; Sulfurospirillaceae	Sulfurospirillum	0	8	3	0	2		0	0.0250965	0.00951656	0	0.00605492
Chloroflexota; Anaerolineae; Anaerolineales	Anaerolineaceae	0	0	8	40	44		0	0	0.0253775	0.146692	0.133208
delta/epsilon subdivisions; Deltaproteobacteria; Bradymonadales; Microvenatoraceae	Microvenator	153	62	138	369	65		0.0361524	0.194498	0.437762	1.35323	0.196785
Ignavibacteriota; Ignavibacteria; Ignavibacteriales	Ignavibacteriaceae	1675	8	2	0	0		0.395786	0.0250965	0.00634437	0	0
Mycoplasmatota; Mollicutes; Acholeplasmatales; Acholeplasmataceae	Acholeplasma	0	73	162	215	158		0	0.229005	0.513894	0.78847	0.478339
Planctomycetota; Planctomycetia	Planctomycetes	227	0	0	9	0		0.0536379	0	0	0.0330057	0
Pseudomonadota unclassified	Pseudomonadota unclassified	4879	141	28	40	60		1.15286	0.442325	0.0888212	0.146692	0.181648
Pseudomonadota; Alphaproteobacteria	Hyphomicrobiales	71360	248	227	597	524		16.8617	0.77799	0.720086	2.18938	1.58639
Pseudomonadota; Alphaproteobacteria	Rhodobacterales unclassified	19008	1241	2586	1162	1601		4.49141	3.89309	8.20327	4.26141	4.84696
Pseudomonadota; Alphaproteobacteria; Rhodobacterales; Roseobacteraceae	Roseovarius	50700	0	127	0	64		11.9799	0	0.402868	0	0.193757
Pseudomonadota; Alphaproteobacteria; Hyphomicrobiales	Stappiaceae-Stappia	146	836	3144	5159	6521		0.0344984	2.62258	9.97335	18.9196	19.7421
Pseudomonadota; Alphaproteobacteria; Hyphomicrobiales; Devosiaceae	Devosia	0	62	148	592	1035		0	0.194498	0.469484	2.17104	3.13342
Pseudomonadota; Alphaproteobacteria; Hyphomicrobiales; Hyphomicrobiaceae	Hyphomicrobium	183376	0	223	603	562		43.33	0	0.707398	2.21138	1.70143
Pseudomonadota; Alphaproteobacteria; Rhodobacterales	Paracoccaceae	3204	183	1494	545	590		0.757075	0.574082	4.73925	1.99868	1.7862
Pseudomonadota; Alphaproteobacteria; Rhodospirillales;	Oceanibaculaceae	49355	870	2281	2688	2159		11.6621	2.72924	7.23576	9.85771	6.53628
Pseudomonadota; Gammaproteobacteria; Oceanospirillales; Alcanivoracaceae	Marinicella	3602	1486	8135	3329	4428		0.851118	4.66167	25.8057	12.2084	13.4056
Pseudomonadota; Gammaproteobacteria; Pseudomonadales	Pseudomonadaceae	0	66	13	15	12		0	0.207046	0.0412384	0.0550095	0.0363295
Pseudomonadota; Gammaproteobacteria; Thiotrichales; Piscirickettsiaceae	Methylophaga	15817	21950	7115	7973	11925		3.73741	68.8584	22.5701	29.2394	36.1024
Pseudomonadota;Alphaproteobacteria; Hyphomicrobiales; Cohaesibacteraceae	Cohaesibacter	665	32	88	296	122		0.157133	0.100386	0.279152	1.08552	0.36935
Pseudomonadota;Alphaproteobacteria; Hyphomicrobiales; Devosiaceae	Maritalea	334	26	82	109	37		0.078921	0.0815635	0.260119	0.399736	0.112016
Pseudomonadota;Alphaproteobacteria; Hyphomicrobiales; Rhizobiaceae	Hoeflea	0	503	467	261	774		0	1.57794	1.48141	0.957166	2.34325
Pseudomonadota;Gammaproteobacteria; Alteromonadales; Idiomarinaceae	Idiomarina	0	1905	291	324	183		0	5.9761	0.923106	1.18821	0.554025
Pseudomonadota;Gammaproteobacteria; Chromatiales; Sedimenticolaceae	Sedimenticola	863	9	0	0	4		0.203919	0.0282335	0	0	0.0121098
Pseudomonadota;Gammaproteobacteria; Oceanospirillales; Halomonadaceae	Halomonas	0	18	46	77	87		0	0.056467	0.145921	0.282382	0.263389
Pseudomonadota;Gammaproteobacteria; Pseudomonadales; Marinobacteraceae	Marinobacter	611	495	548	159	56		0.144373	1.55284	1.73836	0.583101	0.169538
Spirochaetota; Spirochaetia; Spirochaetales	Spirochaetaceae	0	22	258	239	77		0	0.0690153	0.818424	0.876485	0.233114
Thermodesulfobacteriota; Desulfovibrionia; Desulfovibrionales; Desulfovibrionaceae	Desulfovibrio	0	131	163	271	277		0	0.410955	0.517066	0.993839	0.838606
unclassified_Bacteria	unclassified_Bacteria	4255	122	127	130	208		1.00542	0.382721	0.402868	0.476749	0.629711
Verrucomicrobiota	Verrucomicrobiota	632	0	180	140	214		0.149336	0	0.570994	0.513422	0.647876
	*Based on previous publication by Labbé et al. 2003 Water Research 37 (2003) 914–920
	on the operation of the denitrification continuous system at the Montreal Biodome
	135 ppm-N (10 mM); 2.3 mL/min MeOH, 5750 mL/min flow rate = 0.04% MeOH therefore C/N: 0.86

## Sheet: Graph Fig2
			PCoA1: 68.2%	PCoA2: 24.0%
		OB	1.65	0.05
		R-IODay	-0.5	0.9
		C5s1	-0.4	-0.45
		C5s2	-0.35	-0.3
		C6s2	-0.45	-0.19

## Sheet: PCoA
	Principal composant analysis (PCA) of the bacterial profiles of the biofilm samples.
	Principal coordinate analysis with Bray-Curtis distance
	Both analysis showed very similar results
		Taxa (Relative abundance)
	Biofilm samples	Methylophaga	Hyphomicrobium	Microvenator	Flavobacteriaceae	Pseudomonadaceae	Stappiaceae	Marinicella	Oceanibaculaceae	Hyphomicrobiales	unclassified_Bacteria	Paracoccaceae	Rhodobacterales unclassified	Acholeplasma	Aequorivita	Winogradskyella	Marinilabiliaceae	Sunxiuqinia	Muricauda	Devosia	Marinobacter	Ignavibacteriaceae	Roseovarius	Pseudomonadota unclassified	Idiomarina	Maribacter	Vitellibacter	Cohaesibacter	Maritalea	Hoeflea	Desulfovibrio	Halomonas	Spirochaetaceae	Verrucomicrobiota	Mariniphaga	Anaerolineaceae	Cryomorphaceae	Alkalibacterium	Clostridiales	Planctomycetes	Sulfurimonas	Sedimenticola	Sulfurospirillum
	OB	3.73741	43.33	0.0361524	0.368849	0	0.0344984	0.851118	11.6621	16.8617	1.00542	0.757075	4.49141	0	0.376647	0.257793	0.0165403	0.0418234	0.0604903	0	0.144373	0.395786	11.9799	1.15286	0	0	0	0.157133	0.078921	0	0	0	0	0.149336	0.0193758	0	0	0	1.77572	0.0536379	0	0.203919	0
	D0	68.8584	0	0.194498	2.75434	0.207046	2.62258	4.66167	2.72924	0.77799	0.382721	0.574082	3.89309	0.229005	0.335665	0.144305	0	0	0.304295	0.194498	1.55284	0.0250965	0	0.442325	5.9761	0.310569	0	0.100386	0.0815635	1.57794	0.410955	0.056467	0.0690153	0	0	0	0.0156853	0.382721	0.0156853	0	0.0658782	0.0282335	0.0250965
	C5-1	22.5701	0.707398	0.437762	2.85497	0.0412384	9.97335	25.8057	7.23576	0.720086	0.402868	4.73925	8.20327	0.513894	0.0983378	0.0729603	0.30453	0.0253775	6.5347	0.469484	1.73836	0.00634437	0.402868	0.0888212	0.923106	0.425073	0.244258	0.279152	0.260119	1.48141	0.517066	0.145921	0.818424	0.570994	0.050755	0.0253775	0.241086	0.0158609	0.0444106	0	0	0	0.00951656
	C5-2	29.2394	2.21138	1.35323	1.87032	0.0550095	18.9196	12.2084	9.85771	2.18938	0.476749	1.99868	4.26141	0.78847	0.073346	0	0.451078	0.124688	3.61963	2.17104	0.583101	0	0	0.146692	1.18821	0.51709	0.106352	1.08552	0.399736	0.957166	0.993839	0.282382	0.876485	0.513422	0.183365	0.146692	0.0513422	0.0146692	0.0513422	0.0330057	0	0	0
	C6-2	36.1024	1.70143	0.196785	0.920348	0.0363295	19.7421	13.4056	6.53628	1.58639	0.629711	1.7862	4.84696	0.478339	0.0575217	0	0.0908238	0.0181648	2.04051	3.13342	0.169538	0	0.193757	0.181648	0.554025	0.317883	0.142291	0.36935	0.112016	2.34325	0.838606	0.263389	0.233114	0.647876	0.0787139	0.133208	0	0.00908238	0.0847689	0	0	0.0121098	0.00605492
						Principal component analysis
									OB	Original Biofilm from de denitrification system of the Biodome
									D0	Biofilm from the recirculating reactor at T=0 prior C/N assays
									C5-1	Biofilm from the recirculating reactor, at Day 30 (Period 1), with 21.4 mM nitrate and 0.45% methanol: C/N=4.5
									C5-2	Biofilm from the recirculating reactor, at Day 120 (Period 2), with 21.4 mM nitrate and 0.45% methanol: C/N=4.5
									C6-2	Biofilm from the recirculating reactor, at Day 200 (Period 2), with 21.4 mM nitrate and 0.75% methanol; C/N=7.5
PCoA2: 24.0%
										C/N	Oper	NmM	MeOH%	Physiol
									OB	low	Cont	N10	M0.04	V-Old
									R-IODay	med	Rec	N21.4	M0.3	young
									C5s1	med	Rec	N21.4	M0.45	young
									C5s2	med	Rec	N21.4	M0.45	Old
									C6s2	high	Rec	N21.4	M0.75	Old
				PcoA1: 68.2%

## Sheet: Diversity indexes
Diversity indexes from 16S rRNA sequence profiles
	Proportion (pi)
						Shannon Hi: -[pi*Ln(pi)]						Simpson pi * pi						Proportion (pi)
Sample name	OB	D0	C5-1	C5-2	C6-2	OB	D0	C5-1	C5-2	C6-2		OB	D0	C5-1	C5-2	C6-2		OB	D0	C5-1	C5-2	C6-2
Methylophaga	0.0373741	0.688584	0.225701	0.292394	0.361024	0.12284	0.256923	0.335966	0.359543	0.367815		0.00139682	0.474148	0.050941	0.0854943	0.130339		0.0373741	0.688584	0.225701	0.292394	0.361024
Hyphomicrobium	0.4333	0	0.00707398	0.0221138	0.0170143	0.36238	0	0.0350256	0.084288	0.0693112		0.187749	0	5.00411e-05	0.000489022	0.000289487		0.4333	0	0.00707398	0.0221138	0.0170143
Microvenator	0.000361524	0.00194498	0.00437762	0.0135323	0.00196785	0.00286515	0.0121415	0.0237759	0.0582253	0.0122613		1.307e-07	3.78293e-06	1.91635e-05	0.000183124	3.87243e-06		0.000361524	0.00194498	0.00437762	0.0135323	0.00196785
Flavobacteriaceae	0.00368849	0.0275434	0.0285497	0.0187032	0.00920348	0.0206649	0.0989356	0.101526	0.0744213	0.0431475		1.3605e-05	0.000758637	0.000815084	0.000349811	8.4704e-05		0.00368849	0.0275434	0.0285497	0.0187032	0.00920348
Pseudomonadaceae	0	0.00207046	0.000412384	0.000550095	0.000363295	0	0.0127954	0.00321394	0.0041287	0.0028774		0	4.2868e-06	1.70061e-07	3.02605e-07	1.31983e-07		0	0.00207046	0.000412384	0.000550095	0.000363295
Stappiaceae	0.000344984	0.0262258	0.0997335	0.189196	0.197421	0.00275022	0.0954885	0.229911	0.315006	0.320299		1.19014e-07	0.000687793	0.00994678	0.0357952	0.0389749		0.000344984	0.0262258	0.0997335	0.189196	0.197421
Marinicella	0.00851118	0.0466167	0.258057	0.122084	0.134056	0.0405675	0.142917	0.349558	0.256749	0.269385		7.24402e-05	0.00217312	0.0665936	0.0149046	0.017971		0.00851118	0.0466167	0.258057	0.122084	0.134056
Oceanibaculaceae	0.116621	0.0272924	0.0723576	0.0985771	0.0653628	0.250598	0.098284	0.190021	0.228395	0.178297		0.0136005	0.000744875	0.00523562	0.00971744	0.0042723		0.116621	0.0272924	0.0723576	0.0985771	0.0653628
Hyphomicrobiales	0.168617	0.0077799	0.00720086	0.0218938	0.0158639	0.300159	0.0377809	0.0355258	0.0836683	0.0657353		0.0284316	6.05269e-05	5.18524e-05	0.000479338	0.000251663		0.168617	0.0077799	0.00720086	0.0218938	0.0158639
unclassified_Bacteria	0.0100542	0.00382721	0.00402868	0.00476749	0.00629711	0.0462468	0.0213008	0.0222154	0.0254867	0.0319117		0.000101086	1.46475e-05	1.62302e-05	2.2729e-05	3.96537e-05		0.0100542	0.00382721	0.00402868	0.00476749	0.00629711
Paracoccaceae	0.00757075	0.00574082	0.0473925	0.0199868	0.017862	0.0369715	0.0296235	0.144513	0.078202	0.071896		5.73162e-05	3.2957e-05	0.00224605	0.000399472	0.000319051		0.00757075	0.00574082	0.0473925	0.0199868	0.017862
Rhodobacterales unclassified	0.0449141	0.0389309	0.0820327	0.0426141	0.0484696	0.139369	0.126368	0.205134	0.134472	0.146709		0.00201728	0.00151561	0.00672937	0.00181596	0.0023493		0.0449141	0.0389309	0.0820327	0.0426141	0.0484696
Acholeplasma	0	0.00229005	0.00513894	0.0078847	0.00478339	0	0.0139216	0.0270869	0.0381843	0.0255557		0	5.24434e-06	2.64087e-05	6.21685e-05	2.28808e-05		0	0.00229005	0.00513894	0.0078847	0.00478339
Aequorivita	0.00376647	0.00335665	0.000983378	0.00073346	0.000575217	0.021023	0.0191222	0.00680942	0.00529392	0.00429156		1.41863e-05	1.12671e-05	9.67032e-07	5.37964e-07	3.30875e-07		0.00376647	0.00335665	0.000983378	0.00073346	0.000575217
Winogradskyella	0.00257793	0.00144305	0.000729603	0	0	0.0153664	0.00943897	0.00526993	0	0		6.64572e-06	2.08238e-06	5.3232e-07	0	0		0.00257793	0.00144305	0.000729603	0	0
Marinilabiliaceae	0.000165403	0	0.0030453	0.00451078	0.000908238	0.00144019	0	0.0176449	0.024364	0.0063613		2.73583e-08	0	9.27384e-06	2.03472e-05	8.24896e-07		0.000165403	0	0.0030453	0.00451078	0.000908238
Sunxiuqinia	0.000418234	0	0.000253775	0.00124688	0.000181648	0.00325364	0	0.00210102	0.00833804	0.00156461		1.7492e-07	0	6.44017e-08	1.55472e-06	3.29958e-08		0.000418234	0	0.000253775	0.00124688	0.000181648
Muricauda	0.000604903	0.00304295	0.065347	0.0361963	0.0204051	0.0044826	0.0176337	0.17827	0.120128	0.079416		3.65908e-07	9.25952e-06	0.00427024	0.00131017	0.000416367		0.000604903	0.00304295	0.065347	0.0361963	0.0204051
Devosia	0	0.00194498	0.00469484	0.0217104	0.0313342	0	0.0121415	0.0251704	0.0831501	0.108512		0	3.78293e-06	2.20415e-05	0.000471343	0.000981832		0	0.00194498	0.00469484	0.0217104	0.0313342
Marinobacter	0.00144373	0.0155284	0.0173836	0.00583101	0.00169538	0.00944278	0.0646772	0.0704423	0.029998	0.0108163		2.08437e-06	0.000241132	0.000302189	3.40007e-05	2.8743e-06		0.00144373	0.0155284	0.0173836	0.00583101	0.00169538
Ignavibacteriaceae	0.00395786	0.000250965	6.34437e-05	0	0	0.0218951	0.00208055	0.000613206	0	0		1.56647e-05	6.29833e-08	4.02511e-09	0	0		0.00395786	0.000250965	6.34437e-05	0	0
Roseovarius	0.119799	0	0.00402868	0	0.00193757	0.254207	0	0.0222154	0	0.0121027		0.0143519	0	1.62302e-05	0	3.75419e-06		0.119799	0	0.00402868	0	0.00193757
Pseudomonadota unclassified	0.0115286	0.00442325	0.000888212	0.00146692	0.00181648	0.0514513	0.0239779	0.00624085	0.00957106	0.0114635		0.000132909	1.95652e-05	7.88921e-07	2.15186e-06	3.29958e-06		0.0115286	0.00442325	0.000888212	0.00146692	0.00181648
Idiomarina	0	0.059761	0.00923106	0.0118821	0.00554025	0	0.168371	0.0432492	0.0526699	0.0287856		0	0.00357137	8.52125e-05	0.000141183	3.06944e-05		0	0.059761	0.00923106	0.0118821	0.00554025
Maribacter	0	0.00310569	0.00425073	0.0051709	0.00317883	0	0.0179339	0.0232118	0.0272233	0.0182822		0	9.64529e-06	1.80687e-05	2.67382e-05	1.0105e-05		0	0.00310569	0.00425073	0.0051709	0.00317883
Vitellibacter	0	0	0.00244258	0.00106352	0.00142291	0	0	0.0146914	0.00728103	0.00932722		0	0	5.96621e-06	1.13107e-06	2.02466e-06		0	0	0.00244258	0.00106352	0.00142291
Cohaesibacter	0.00157133	0.00100386	0.00279152	0.0108552	0.0036935	0.0101443	0.00693054	0.0164174	0.0490993	0.020688		2.46908e-06	1.00773e-06	7.79261e-06	0.000117836	1.36419e-05		0.00157133	0.00100386	0.00279152	0.0108552	0.0036935
Maritalea	0.00078921	0.000815635	0.00260119	0.00399736	0.00112016	0.00563849	0.00580042	0.0154817	0.0220739	0.00761068		6.22852e-07	6.65261e-07	6.7662e-06	1.59789e-05	1.25476e-06		0.00078921	0.000815635	0.00260119	0.00399736	0.00112016
Hoeflea	0	0.0157794	0.0148141	0.00957166	0.0234325	0	0.0654695	0.0623996	0.0444982	0.0879571		0	0.00024899	0.000219458	9.16167e-05	0.000549084		0	0.0157794	0.0148141	0.00957166	0.0234325
Desulfovibrio	0	0.00410955	0.00517066	0.00993839	0.00838606	0	0.0225797	0.0272223	0.0458294	0.0400953		0	1.68884e-05	2.67358e-05	9.87716e-05	7.0326e-05		0	0.00410955	0.00517066	0.00993839	0.00838606
Halomonas	0	0.00056467	0.00145921	0.00282382	0.00263389	0	0.00422332	0.00952841	0.0165749	0.0156434		0	3.18853e-07	2.12928e-06	7.97398e-06	6.93737e-06		0	0.00056467	0.00145921	0.00282382	0.00263389
Spirochaetaceae	0	0.000690153	0.00818424	0.00876485	0.00233114	0	0.00502334	0.0393297	0.0415192	0.01413		0	4.76311e-07	6.69818e-05	7.68226e-05	5.43423e-06		0	0.000690153	0.00818424	0.00876485	0.00233114
Verrucomicrobiota	0.00149336	0	0.00570994	0.00513422	0.00647876	0.00971686	0	0.0294949	0.0270667	0.0326479		2.23011e-06	0	3.26034e-05	2.63602e-05	4.19744e-05		0.00149336	0	0.00570994	0.00513422	0.00647876
Mariniphaga	0.000193758	0	0.00050755	0.00183365	0.000787139	0.00165642	0	0.00385023	0.0115547	0.00562577		3.75422e-08	0	2.57607e-07	3.36228e-06	6.19588e-07		0.000193758	0	0.00050755	0.00183365	0.000787139
Anaerolineaceae	0	0	0.000253775	0.00146692	0.00133208	0	0	0.00210102	0.00957106	0.00881973		0	0	6.44017e-08	2.15186e-06	1.77444e-06		0	0	0.000253775	0.00146692	0.00133208
Cryomorphaceae	0	0.000156853	0.00241086	0.000513422	0	0	0.00137406	0.0145321	0.00388887	0		0	2.46028e-08	5.81225e-06	2.63602e-07	0		0	0.000156853	0.00241086	0.000513422	0
Alkalibacterium	0	0.00382721	0.000158609	0.000146692	9.08238e-05	0	0.0213008	0.00138768	0.00129488	0.00084526		0	1.46475e-05	2.51569e-08	2.15186e-08	8.24896e-09		0	0.00382721	0.000158609	0.000146692	9.08238e-05
Clostridiales	0.0177572	0.000156853	0.000444106	0.000513422	0.000847689	0.0715787	0.00137406	0.00342825	0.00388887	0.0059957		0.000315319	2.46028e-08	1.9723e-07	2.63602e-07	7.18576e-07		0.0177572	0.000156853	0.000444106	0.000513422	0.000847689
Planctomycetes	0.000536379	0	0	0.000330057	0	0.00403929	0	0	0.00264582	0		2.87703e-07	0	0	1.08938e-07	0		0.000536379	0	0	0.000330057	0
Sulfurimonas	0	0.000658782	0	0	0	0	0.00482566	0	0	0		0	4.33994e-07	0	0	0		0	0.000658782	0	0	0
Sedimenticola	0.00203919	0.000282335	0	0	0.000121098	0.0126332	0.00230736	0	0	0.00109217		4.15828e-06	7.97132e-08	0	0	1.46648e-08		0.00203919	0.000282335	0	0	0.000121098
Sulfurospirillum	0	0.000250965	9.51656e-05	0	6.05492e-05	0	0.00208055	0.000881223	0	0.000588057		0	6.29833e-08	9.05649e-09	0	3.6662e-09		0	0.000250965	9.51656e-05	0	6.05492e-05
					H	1.82338	1.42515	2.34546	2.38829	2.13786	D	0.248289	0.484302	0.147772	0.152164	0.197062
											E (1-D)	0.751711	0.515698	0.852228	0.847836	0.802938		27	33	39	36	37	Richness S
Diversity alpha	OB	D0	C5-1	C5-2	C6-2
Richness S	27	33	39	36	37
Shannon H	1.82338	1.42515	2.34546	2.38829	2.13786
Simpson D	0.248289	0.484302	0.147772	0.152164	0.197062
Simpson E (1-D)	0.751711	0.515698	0.852228	0.847836	0.802938
Ln S	3.29584	3.49651	3.66356	3.58352	3.61092
Piélou J	0.553238	0.407591	0.640212	0.666466	0.592055
Beta diversity (Jaccard)
	D0	C5-1	C5-2	C6-2
OB	0.5	0.609756	0.575	0.6
D0	1	0.756098	0.682927	0.707317
C5-1		1	0.875	0.9
C5-2			1	0.871795
C6-2				1
C/(Rx +Ry)-C	C: common taxa between Condition x and Condition y
	Rx: Richness of Condition x
	Ry: Richness of Condition y
