# Supplementary material for: Modulation of carbon-to-nitrogen ratio shapes the microbial ecology in a methanol-fed recirculating marine denitrifying reactor
Source: PeerJ. 2025 Oct 13;13:e20129. doi: 10.7717/peerj.20129 (PMC12530212; doi:10.7717/peerj.20129)
Supplement: Supplemental Information 5 [file peerj-13-20129-s005.xlsx]

## Sheet: Raw and processed data
										Strain GP59	Methylophaga nitratireducenticrescens GP59
	Proportion of raw reads that aligned to strains GP59, JAM1 and NL23, and those that did not aligned									Strain JAM1	Methylophaga nitratireducenticrescens JAM1
										Strain NL23	Hyphomicrobium nitrativorans NL23
			unaligned reads		Aligned to strains GP59, JAM1, NL23		Aligned to GP59
		Total reads	# of reads	%	# of reads	%	# of reads	%
	C1-1	61055437	56945644	93.2688	4109793	6.73125	3940265	6.45359
	C4-1	56507228	51724802	91.5366	4782426	8.46339	4654282	8.23661
	C6-1	57224127	52510815	91.7634	4713312	8.23658	4513413	7.88726
	C8-1	56982986	53358877	93.64	3624109	6.35998	3433051	6.02469
	OB	56395484	54858050	97.2738	1537434	2.72617	1001222	1.77536
	The paired reads were aligned to a concatenated sequence consisting of the three reference genomes
	(JAM1 + GP59 + NL23) and the two plasmids (from strain GP59) using Bowtie2
	Proportion of unaligned reads associated to ORF and ncRNA and their lineage affiliation
		Proportion of reads (TPM-RSEM) associated to ORF					Proportion of reads (TPM-RSEM) associated to ncRNA					others
		Archaea	Bacteria	Eukaryota	Virus	Total	FlavoRNA	RNaseP	tmRNA	tRNA, rRNA*	Euk rRNA
	C1-1	663	197970	227	4156	203016	372601	54561	78416.3	257723	nd	33682.7
	C4-1	287	148550	153	6645	155635	490052	44379	37319	221946	nd	50669
	C6-1	262	98862	122	1151	100397	440640	32797	15718	244781	nd	165667
	C8-1	380	152440	207	2955	155982	623385	37852	38519	76765	nd	67497
	OB	140	43709	3754	593	48196	1852	8544	11459	161201	725329	43419
	The reads that did not align were de novo assembled by Trinity. Estimation of the transcript abundance of the de novo assembled sequences was performed by RSEM.
	The resulting assembled sequences were annotated at the Joint Genomic Institute to find open reading frames with their putative function and affiliation .
	Reads associated with the respective ORFs and non-coding RNA (nc) were added by taxon.
	The relative expression levels per taxon or lineage were expressed as transcripts per million by RSEM (TPM-RSEM)
		nd: not determined		OB: Original Biofilm
		*Values include Eukaryota and bacterial rRNA except the OB samples
			Very low proportions of Eukaryota rRNA were in the C1-1, C4-1, C6-1 and C8-1 samples
	List of the affiliation corresponding to the contigs associated to Eukaryota rRNA (18S or 28S)
		Eukaryota; Amoebozoa; Discosea; Flabellinia; Dactylopodida; Paramoebidae; Paramoeba; 95%
		Eukaryota; Metazoa; Ecdysozoa; Nematoda; 93%
		Eukaryota; Opisthokonta; Choanoflagellata; Craspedida; Salpingoecidae; 92%
		Eukaryota; Opisthokonta; Fungi; 75%
		Eukaryota; Opisthokonta; Metazoa; Eumetazoa; Cnidaria; Hydrozoa; 81%
		Eukaryota; Sar; Alveolata; Ciliophora; Intramacronucleata; Oligohymenophorea; Peritrichia; Sessilida; Vorticellidae; Vorticella; 91%
		Eukaryota; Sar; Alveolata; Ciliophora; Intramacronucleata; Oligohymenophorea; Peritrichia; Sessilida; Epistylidae; Epistylis; 86%
		Eukaryota; Sar; Alveolata; Ciliophora; Intramacronucleata; Oligohymenophorea; Scuticociliatia; Philasterida; Philasteridae; Miamiensis; 95%
		Eukaryota; Sar; Alveolata; Ciliophora; Intramacronucleata; Oligohymenophorea; Scuticociliatia; Philasterida; Uronematidae; Uronema; 90%
		Eukaryota; Sar; Alveolata; Ciliophora; Intramacronucleata; Oligohymenophorea; Scuticociliatia; Philasterida; IAFDv12; 99.9%
		Eukaryota; Sar; Alveolata; Dinophyceae; Gonyaulacales; Pyrocystaceae; Alexandrium; 88%
	Percentages correspond to the identity with the closest rRNA squence.

## Sheet: Affiliation
	Affiliations of grouped contigs-ORF with their proportion in the biofilm samples
		OB	C1	C4	C6	C8
	Kingdom	TPM-RSEM	TPM-RSEM	TPM-RSEM	TPM-RSEM	TPM-RSEM
	Archaea	140	663	287	262	380
	Bacteria	43709	197970	148550	98862	152440
	Eukaryota	3754	227	153	122	207
	Virus	593	4156	6645	1151	2955
	ncRNA	TPM-RSEM	TPM-RSEM	TPM-RSEM	TPM-RSEM	TPM-RSEM
	FlavoRNA	1852	372601	490052	440640	623385
	RNaseP	8544	54561	44379	32797	37852
	tmRNA	11459	78416.3	37319	15718	38519
	tRNA, rRNA, Bacteria	161201	257723	221946	244781	76765
	tRNA, rRNA, Eukarya	725329
														PCoA and PCA not informative
							Those with >2% TPM-RSEM were selected
		OB	C1	C4	C6	C8	Proportion
	genus	TPM-RSEM	TPM-RSEM	TPM-RSEM	TPM-RSEM	TPM-RSEM	%	%	%	%	%			OB	C1	C4	C6	C8
	Total	25870	175524	107919	75904.5	124186	OB	C1	C4	C6	C8		genus	TPM-RSEM	TPM-RSEM	TPM-RSEM	TPM-RSEM	TPM-RSEM
	Aequorivita	50	1751	3688	450	13926	0.193274	0.997584	3.41738	0.59285	11.2138		Total	21070	165079	96618	65572.5	112898
	Bradymonas	914	6973	3152	624	2143	3.53305	3.97268	2.92071	0.822086	1.72564		Muricauda	40	67328	5571	9270	21697
	Candidatus Promineofilum	799	455	964	1707	1086	3.08852	0.259224	0.893263	2.24888	0.874495		Marinobacter	100	21243	27004	10848	4753
	Cohaesibacter	49	579	122	1598	27	0.189409	0.329869	0.113048	2.10528	0.0217416		Idiomarina	28	20553	3903	1634	1915
	Cycloclasticus	693	5	3	0.48	2	2.67878	0.00284861	0.00277986	0.000632374	0.00161049		Oceanibaculum	356	12262	8644	6617	29377
	Dechloromarinus	1038	20	31	17	47	4.01237	0.0113945	0.0287252	0.0223966	0.0378465		Stappia	16	7658	8866	11093	15445
	Geofilum	1	4357	2348	666	1374	0.00386548	2.48228	2.17571	0.877419	1.1064		Bradymonas	914	6973	3152	624	2143
	Hoeflea	9	291	575	533	383	0.0347893	0.165789	0.532807	0.702198	0.308408		unclassified Tenericutes	0	5670	2818	1382	596
	Hyphomicrobium	184	629	1787	952	9308	0.711249	0.358356	1.65587	1.25421	7.49521		Geofilum	1	4357	2348	666	1374
	Idiomarina	28	20553	3903	1634	1915	0.108233	11.7095	3.6166	2.15271	1.54204		Spirochaeta	12	4077	4312	2803	2404
	Lentimicrobium	9	1070	1448	3619	1334	0.0347893	0.609603	1.34175	4.76783	1.0742		Paracoccus	17	2963	5425	2972	3518
	Leptolyngbya	1828	64	67	55	269	7.0661	0.0364623	0.0620836	0.0724595	0.216611		Marinicella	26	2015	10042	174	751
	Marinicella	26	2015	10042	174	751	0.100503	1.14799	9.30513	0.229235	0.604738		Sunxiuqinia	15	1997	2285	3794	886
	Mariniphaga	3	372	2166	646	244	0.0115964	0.211937	2.00706	0.85107	0.196479		Aequorivita	50	1751	3688	450	13926
	Marinobacter	100	21243	27004	10848	4753	0.386548	12.1026	25.0225	14.2916	3.82732		Pseudodesulfovibrio	3	1664	509	2208	450
	Methylophaga	12608	340	361	981	473	48.736	0.193706	0.33451	1.29241	0.38088		Lentimicrobium	9	1070	1448	3619	1334
	Muricauda	40	67328	5571	9270	21697	0.154619	38.3583	5.1622	12.2127	17.4714		Roseovarius	113	736	520	922	485
	Oceanibaculum	356	12262	8644	6617	29377	1.37611	6.98594	8.00971	8.71754	23.6556		Hyphomicrobium	184	629	1787	952	9308
	Paracoccus	17	2963	5425	2972	3518	0.0657132	1.68809	5.02692	3.91545	2.83285		Cohaesibacter	49	579	122	1598	27
	Pseudodesulfovibrio	3	1664	509	2208	450	0.0115964	0.948019	0.47165	2.90892	0.36236		Candidatus Promineofilum	799	455	964	1707	1086
	Roseovarius	113	736	520	922	485	0.436799	0.419316	0.481843	1.21468	0.390543		Mariniphaga	3	372	2166	646	244
	Sedimenticola	2159	7	7	7	5	8.34557	0.00398806	0.00648635	0.00922212	0.00402622		Methylophaga	12608	340	361	981	473
	Spirochaeta	12	4077	4312	2803	2404	0.0463858	2.32276	3.99559	3.6928	1.93581		Hoeflea	9	291	575	533	383
	Stappia	16	7658	8866	11093	15445	0.0618477	4.36294	8.21542	14.6144	12.437		Leptolyngbya	1828	64	67	55	269
	Sunxiuqinia	15	1997	2285	3794	886	0.0579822	1.13774	2.11733	4.99839	0.713446		Dechloromarinus	1038	20	31	17	47
	unclassified Tenericutes	0	5670	2818	1382	596	0	3.23033	2.61122	1.82071	0.479925		Sedimenticola	2159	7	7	7	5
	Devosia	23	1510	746	838	2328	0.0889061	0.860281	0.691259	1.10402	1.87461		Cycloclasticus	693	5	3	0.48	2
	Dictyostelium	306	1	0	0	2	1.18284	0.000569723	0	0	0.00161049		others (67)	4800	10445	11301	10332	11288
	Lewinella	476	61	49	75	63	1.83997	0.0347531	0.0454044	0.0988084	0.0507304
	Maribacter	38	1553	1027	1098	1403	0.146888	0.884779	0.95164	1.44655	1.12976
	Phycisphaera	509	2	1	4	1	1.96753	0.00113945	0.000926621	0.00526978	0.000805244
	Pseudomonas	290	688	340	192	278	1.12099	0.391969	0.315051	0.252949	0.223858
	Salpingoeca	375	3	2	0	0	1.44956	0.00170917	0.00185324	0	0
	Shimia	29	59	411	822	11	0.112099	0.0336136	0.380841	1.08294	0.00885768
	Wenzhouxiangella	298	15	33	56	11	1.15191	0.00854584	0.0305785	0.0737769	0.00885768
	Xanthomarina	2	1299	805	1274	1170	0.00773096	0.74007	0.74593	1.67843	0.942135
	Acetobacterium	1	3	4	396	0	0.00386548	0.00170917	0.00370648	0.521708	0
	Aminobacter	9	12	6	16	9	0.0347893	0.00683667	0.00555973	0.0210791	0.00724719
	Aquamicrobium	4	22	27	115	50	0.0154619	0.0125339	0.0250188	0.151506	0.0402622
	Aquamicrobium	4	22	27	0	0	0.0154619	0.0125339	0.0250188	0	0
	Ardenticatena	202	255	536	525	877	0.780827	0.145279	0.496669	0.691659	0.706199
	Azoarcus	195	24	33	7	26	0.753769	0.0136733	0.0305785	0.00922212	0.0209363
	Bacillus	127	196	234	0	0	0.490916	0.111666	0.216829	0	0
	Bacteroides	13	108	73	67	53	0.0502513	0.06153	0.0676433	0.0882688	0.0426779
	Brucella	3	0	10	0	0	0.0115964	0	0.00926621	0	0										OB	C1	C4	C6	C8
	Burkholderia	81	50	63	29	88	0.313104	0.0284861	0.0583771	0.0382059	0.0708614
	Caldilinea	139	259	492	453	636	0.537302	0.147558	0.455897	0.596803	0.512135
	Chelativorans	1	18	24	0	0	0.00386548	0.010255	0.0222389	0	0
	Cronobacter	2	0	276	0	0	0.00773096	0	0.255747	0	0
	Dasania	15	12	6	0	0	0.0579822	0.00683667	0.00555973	0	0
	Desulfofustis	3	4	4	730	25	0.0115964	0.00227889	0.00370648	0.961735	0.0201311
	Edwardsiella	12	19	20	0	0	0.0463858	0.0108247	0.0185324	0	0
	Enterobacter	12	26	37	0	0	0.0463858	0.0148128	0.034285	0	0
	Enterococcus	6	6	12	0	0	0.0231929	0.00341834	0.0111195	0	0
	Escherichia	32	6	5	3	4	0.123695	0.00341834	0.0046331	0.00395234	0.00322097
	Haliscomenobacter	66	15	25	0	0	0.255122	0.00854584	0.0231655	0	0
	Halomonas	93	718	951	314	209	0.35949	0.409061	0.881216	0.413678	0.168296
	Hymenobacter	34	812	698	42	35	0.131426	0.462615	0.646781	0.0553327	0.0281835
	Ignavibacterium	42	16	16	109	25	0.16235	0.00911556	0.0148259	0.143602	0.0201311
	Klebsiella	8	51	39	0	0	0.0309239	0.0290559	0.0361382	0	0
	Kordiimonas	9	8	5	0	0	0.0347893	0.00455778	0.0046331	0	0
	Labrenzia	45	66	68	57	99	0.173947	0.0376017	0.0630102	0.0750944	0.0797191
	Legionella	35	29	21	0	0	0.135292	0.016522	0.019459	0	0
	Leptospira	25	44	27	28	19	0.096637	0.0250678	0.0250188	0.0368885	0.0152996
	Levilinea	91	272	621	663	1186	0.351759	0.154965	0.575432	0.873466	0.955019
	Lutimaribacter	9	58	90	85	22	0.0347893	0.0330439	0.0833959	0.111983	0.0177154
	Magnetospirillum	16	16	24	0	0	0.0618477	0.00911556	0.0222389	0	0
	Mariniblastus	129	4	10	0	8	0.498647	0.00227889	0.00926621	0	0.00644195
	Maritimibacter	6	28	29	32	19	0.0231929	0.0159522	0.026872	0.0421582	0.0152996
	Melioribacter	20	18	31	146	14	0.0773096	0.010255	0.0287252	0.192347	0.0112734
	Mesorhizobium	33	118	238	197	265	0.127561	0.0672273	0.220536	0.259537	0.21339
	Methanosarcina	0	496	40	0	49	0	0.282582	0.0370648	0	0.0394569
	Methylosinus	0	10	0	17	437	0	0.00569723	0	0.0223966	0.351892
	Nitratireductor	25	61	73	72	100	0.096637	0.0347531	0.0676433	0.0948561	0.0805244
	Nocardia	17	37	64	0	0	0.0657132	0.0210797	0.0593037	0	0
	Novosphingobium	20	30	38	0	0	0.0773096	0.0170917	0.0352116	0	0
	Phyllobacterium	11	20	19	0	0	0.0425203	0.0113945	0.0176058	0	0
	Prevotella	15	47	43	0	0	0.0579822	0.026777	0.0398447	0	0
	Pseudooceanicola	14	48	53	64	25	0.0541167	0.0273467	0.0491109	0.0843165	0.0201311
	Rhizobium	87	148	220	0	0	0.336297	0.084319	0.203857	0	0
	Rhodovulum	25	62	184	0	0	0.096637	0.0353228	0.170498	0	0
	Ruegeria	26	82	156	141	95	0.100503	0.0467173	0.144553	0.18576	0.0764982
	Stenotrophomonas	21	15	29	0	0	0.0811751	0.00854584	0.026872	0	0
	Streptomyces	78	132	116	112	136	0.301508	0.0752034	0.107488	0.147554	0.109513
	Sulfitobacter	46	55	121	152	51	0.177812	0.0313347	0.112121	0.200252	0.0410674
	Thalassobius	5	21	38	49	9	0.0193274	0.0119642	0.0352116	0.0645548	0.00724719
	Thalassobius	5	21	38	0	0	0.0193274	0.0119642	0.0352116	0	0
	Thauera	182	27	20	24	16	0.703518	0.0153825	0.0185324	0.0316187	0.0128839
	Thermanaerothrix	139	289	650	731	603	0.537302	0.16465	0.602304	0.963053	0.485562
	Thermoflexus	116	232	522	524	736	0.448396	0.132176	0.483696	0.690341	0.592659
	Thermogemmatispora	0	7	443	0	46	0	0.00398806	0.410493	0	0.0370412
	Winogradskyella	68	66	211	63	24	0.262853	0.0376017	0.195517	0.0829991	0.0193258
	Xanthomonas	32	33	27	10	25	0.123695	0.0188008	0.0250188	0.0131745	0.0201311
	others	4800	10445	11301	10332	11288	18.5543	5.95075	10.4717	13.6118	9.08959
