# Supplementary material for: Modulation of carbon-to-nitrogen ratio shapes the microbial ecology in a methanol-fed recirculating marine denitrifying reactor
Source: PeerJ. 2025 Oct 13;13:e20129. doi: 10.7717/peerj.20129 (PMC12530212; doi:10.7717/peerj.20129)
Supplement: Supplemental Information 6 [file peerj-13-20129-s006.xlsx]

## Sheet: Raw reads
	CDS: Coding sequence, main genome				PlkAN: Methylophaga-1403 medium, planktonic cultures anoxic conditions with 21.4 mM nitrate and 0.3% methanol C/N: 3							GenBank: CP021973.1, CP021974.1, CP021975.1
	PG-CDS: Coding sequence plasmid 1				PlkON: Methylophaga-1403 medium, planktonic culture oxic conditions with 21.4 mM nitrate and 0.3% methanol C/N: 3
	PP-CDS: Coding sequence plasmid 2				PlkO: Methylophaga-1403 medium, planktonic culture oxic conditions without nitrate and 0.3% methanol
	N-Cod: intergenic region				300N23C: Biofilm static culture in artificial seawater in vial, 21.4 mM nitrate, 0.15% methanol, 23°C
	Pseudo: Pseudogene				900N30C: Biofilm culture in artificial seawater in vial, 64.2 mM nitrate, 0.15% methanol, 30°C
					0%NaCl: Biofilm culture in artificial seawater in vial with 0% NaCl, 21.4 mM nitrate, 0.15% methanol, 23°C
					OB: Original Biofilm, IO medium
					Cond1: Recirculating reactor, IO medium, 10.7 mM nitrate, 0.075% methanol, C/N: 1.5
					Cond4: Recirculating reactor, IO medium, 21.4 mM nitrate, 0.3% methanol, C/N: 3
					Cond6: Recirculating reactor, IO medium, 21.4 mM nitrate, 0.75% methanol, C/N: 7.5
					Cond8: Recirculating reactor, IO medium, 42.8 mM nitrate, 0.6% methanol, C/N: 3
						OB	300N23C	900N30C	0%NaCl	Cond1	Cond4	Cond6	Cond8	PlkAN1	PlkAN2	PlkAN3	PlkON1	PlkON2	PlkON3	PlkO1	PlkO2	PlkO3
	Start	End	length	Strand	Annotations	341747	56445491	50895406	17929207	1178170	1084752	1435015	1491484	44340391	42564359	8339065	48906721	68196920	36626460	24780391	21514758	61573759
CDS	308	976	669	-	A10002;CDW43_RS000107-cyano-7-deazaguanine synthase QueC;;	54	4903	5448	1382	98	94	93	81	5858	4473	685	4242	7720	4579	4288	3318	10184
CDS	973	1614	642	-	A10003;CDW43_RS000157-carboxy-7-deazaguanine synthase QueE;;	37	6809	6732	1961	73	52	76	98	7734	5192	856	6728	11952	7352	5218	4143	13994
CDS	1638	2468	831	-	A10004;CDW43_RS00020tol-pal system protein YbgF;;	183	17366	16346	4940	216	220	359	501	18501	14272	2578	23637	38426	23445	11046	11152	40801
CDS	2470	3039	570	-	A10005;CDW43_RS00025peptidoglycan-associated lipoprotein Pal;;	127	13081	13491	6362	354	260	514	817	16421	13446	2584	15956	24659	12922	11491	9321	26206
CDS	3061	4362	1302	-	A10006;CDW43_RS00030Tol-Pal system beta propeller repeat protein TolB;;	177	20517	21439	8051	533	456	759	1111	17651	15121	3240	16539	24623	13681	13399	10652	26156
CDS	4374	5507	1134	-	A10007;CDW43_RS00035cell envelope integrity protein TolA;;	19	13378	13818	5641	98	48	139	156	14707	11311	1825	8053	12318	7128	3698	3494	12713
CDS	5514	5960	447	-	A10008;CDW43_RS00040protein TolR;;	58	8573	10314	3443	113	58	156	167	8394	7436	1498	13336	20334	12767	8257	7105	19514
CDS	5975	6643	669	-	A10009;CDW43_RS00045protein TolQ;;	87	10144	11921	4471	148	104	250	180	10284	8776	1986	12517	19436	12202	8652	7132	18470
CDS	6633	7037	405	-	A10010;CDW43_RS00050tol-pal system-associated acyl-CoA thioesterase;;	55	7460	7638	3473	103	74	206	161	7879	6770	1173	6631	11332	6492	5465	4405	11360
CDS	7037	8050	1014	-	A10011;CDW43_RS00055Holliday junction branch migration DNA helicase RuvB;;	201	16678	17871	7989	486	391	685	602	20233	15969	2245	20068	34407	19146	18106	13867	33545
CDS	8053	8649	597	-	A10012;CDW43_RS00060Holliday junction branch migration protein RuvA;;	54	4848	5104	2298	136	113	185	211	5698	4741	587	7591	12544	7363	5267	4373	13988
CDS	8646	9185	540	-	A10013;CDW43_RS00065crossover junction endodeoxyribonuclease RuvC;;	51	6559	6410	2742	102	87	108	86	6729	5907	801	7820	13007	8284	5072	4647	13783
CDS	9200	9949	750	-	A10014;CDW43_RS00070YebC/PmpR family DNA-binding transcriptional regulator;;	77	12248	13392	5779	174	102	325	195	14644	13325	1951	12532	20398	11309	9378	8216	19411
CDS	9997	10926	930	-	A10015;CDW43_RS00075branched-chain amino acid transaminase;;	112	13992	17793	7063	335	225	627	393	15096	15669	2554	18013	26657	14343	11154	9983	22938
CDS	10969	13776	2808	-	A10016;CDW43_RS00080bifunctional [glutamate--ammonia ligase]-adenylyl-L-tyrosine phosphorylase/[glutamate--ammonia-ligase] adenylyltransferase;;	97	12227	13459	4115	403	341	539	415	8471	9477	1934	16926	23747	11696	7061	5810	17987
CDS	14136	14504	369	+	A10017;CDW43_RS00085DUF6164 family protein;;	42	6777	6744	2912	208	217	240	189	7700	6316	1014	5381	6322	3337	1824	1597	4491
CDS	14594	16222	1629	-	A10018;CDW43_RS00090chaperonin GroEL;;	754	100805	69769	17172	2034	1473	3231	4689	36743	73334	24470	36454	70514	55991	111060	90086	207039
CDS	16280	16570	291	-	A10019;CDW43_RS00095co-chaperone GroES;;	64	22913	14756	4636	461	407	1139	929	5472	11337	5915	4133	7176	5128	11592	10644	21413
CDS	16718	17173	456	-	A10020;CDW43_RS00100FxsA family protein;;	51	3846	5863	672	318	172	402	370	992	2764	1265	2276	2823	1641	3118	2099	3854
CDS	17402	18754	1353	+	A10021;CDW43_RS00105porin;;	40	5446	5911	2301	5722	5973	18069	28972	4139	4927	3307	3681	10353	2596	2181	1856	4676
CDS	18848	20638	1791	+	A10022;CDW43_RS00110bifunctional diguanylate cyclase/phosphodiesterase;;	26	7369	7416	2638	532	632	1903	2889	5259	6003	1277	6873	9975	5174	2768	2305	8180
CDS	20672	21112	441	-	A10023;CDW43_RS00115arsenate reductase (thioredoxin);;	17	2852	2825	729	1253	1498	6385	6938	1200	1419	470	2736	4030	1685	1044	875	2686
CDS	21267	21944	678	+	A10024;CDW43_RS00120TIGR04211 family SH3 domain-containing protein;;	68	12099	12914	4230	174	177	245	157	6693	7633	2105	7607	9397	4638	2399	2088	6163
CDS	21986	22531	546	-	A10025;CDW43_RS00125pyridoxamine 5'-phosphate oxidase family protein;;	394	17738	26084	2402	168	157	188	109	3506	4045	3779	5475	6793	3821	1877	1836	5672
CDS	23468	25252	1785	+	A10026;CDW43_RS00130ABC transporter ATP-binding protein;;	48	8276	9460	3613	237	212	356	191	7615	9507	1609	6484	9137	4742	3881	3309	7883
CDS	25586	27439	1854	-	A10027;CDW43_RS00135dihydroxy-acid dehydratase;;	156	40954	41202	17593	1035	739	1777	608	28364	34538	5337	21032	31279	16000	17188	13807	26384
CDS	27562	28857	1296	+	A10028;CDW43_RS00140amino-acid N-acetyltransferase;;	115	16227	17061	5177	260	272	346	299	13442	13977	2693	12452	16370	9631	7002	6186	14238
CDS	28854	29369	516	-	A10029;CDW43_RS00145RNA pyrophosphohydrolase;;	84	9342	9549	2717	276	241	297	197	5483	5955	1579	5948	7978	3899	4163	2966	6028
CDS	29518	30174	657	+	A10030;CDW43_RS00150HAD family hydrolase;;	61	6378	6562	2876	245	166	272	225	8395	7853	982	4004	5580	3094	2919	2433	5578
CDS	30221	31663	1443	+	A10031;CDW43_RS00155Asp-tRNA(Asn)/Glu-tRNA(Gln) amidotransferase subunit GatB;;	96	23089	23103	11385	272	253	607	618	21248	19382	4159	15468	23694	12520	10347	9061	20312
CDS	31871	33013	1143	+	A10032;CDW43_RS00160FIST N-terminal domain-containing protein;;	179	25075	16647	7424	866	1057	1840	2796	20742	18385	4695	30711	57891	35214	22726	20000	77201
CDS	33033	34307	1275	-	A10033;CDW43_RS00165glutamate--cysteine ligase;;	214	20600	21378	8092	517	414	660	742	16661	19569	4224	18621	26533	14029	10572	8164	24176
CDS	34956	35363	408	+	A10034;CDW43_RS00170twitching motility response regulator PilG;;	39	12938	9490	3415	175	277	247	164	5261	6349	2095	19949	27513	13670	5447	4684	25669
CDS	35371	35742	372	+	A10035;CDW43_RS00175twitching motility response regulator PilH;;	34	9550	7774	2621	68	69	75	62	4404	5136	1584	6818	9323	4709	1953	1779	8763
CDS	35739	36287	549	+	A10036;CDW43_RS00180chemotaxis protein CheW;;	79	12692	10788	3295	134	112	126	123	6246	6582	1403	14821	21151	11761	4501	4593	19936
CDS	36312	37574	1263	+	A10037;CDW43_RS00185methyl-accepting chemotaxis protein;;	151	20637	18235	5987	164	116	294	211	10650	10254	2573	30140	47826	26149	12362	10648	40274
CDS	37603	43308	5706	+	A10038;CDW43_RS00190Hpt domain-containing protein;;	348	50432	42602	14461	383	317	392	440	33926	30647	5505	92593	160911	99253	38343	35140	169478
CDS	43331	43816	486	+	A10039;CDW43_RS00195chemotaxis protein CheW;;	17	4471	3882	1420	40	39	55	75	2466	2131	376	6114	10987	7489	2686	2466	14379
CDS	43826	45769	1944	+	A10040;CDW43_RS00200transglycosylase SLT domain-containing protein;;	72	11093	10677	4274	224	199	371	285	11282	8705	1470	8653	16203	10659	9401	7493	25268
CDS	45779	47020	1242	+	A10041;CDW43_RS00205multifunctional CCA addition/repair protein;;	43	8754	8390	2682	113	108	146	137	7762	7575	1377	8658	12465	7231	6863	5427	13862
CDS	47083	48066	984	+	A10042;CDW43_RS00210methenyltetrahydromethanopterin cyclohydrolase;;	110	12693	12395	4111	190	216	423	345	15930	14270	3033	11709	17318	9772	7916	7138	18845
CDS	48076	49002	927	+	A10043;CDW43_RS00215RimK family alpha-L-glutamate ligase;;	89	7625	7220	2695	89	110	210	144	8350	6729	1176	7608	11820	6757	6509	5652	12268
CDS	48992	49870	879	+	A10044;CDW43_RS00220triphosphoribosyl-dephospho-CoA synthase;;	161	34531	32058	8231	1008	1270	1164	996	16518	14487	3220	31072	46202	24569	11696	10318	36952
CDS	49989	50507	519	+	A10045;CDW43_RS00225formaldehyde-activating enzyme;;	4480	140534	167982	38467	1741	1945	2396	3734	117503	87717	15554	75832	134551	82971	51701	46625	162041
CDS	50549	51244	696	-	A10046;CDW43_RS00230HisA/HisF-related TIM barrel protein;;	63	9240	9817	3446	114	105	131	117	3307	3217	472	5050	7669	4402	2237	1880	6329
CDS	51267	52262	996	+	A10047;CDW43_RS00235ATP-grasp domain-containing protein;;	23	4813	5078	1733	191	232	407	275	3792	3897	713	3680	5146	2569	1906	1685	4017
CDS	52255	53298	1044	+	A10048;CDW43_RS00240hydantoinase/oxoprolinase family protein;;	74	6667	7593	3196	249	231	532	318	5033	4765	903	6810	9644	5339	3897	3308	8640
CDS	53308	54693	1386	+	A10049;CDW43_RS00245aminodeoxychorismate synthase component I;;	34	5090	4723	2055	116	83	228	131	4031	3901	501	5695	8559	4941	3665	3127	8759
CDS	54694	55269	576	+	A10050;CDW43_RS00250delta 1-pyrroline-5-carboxylate synthetase;;	7	2119	1965	771	32	29	39	21	1920	1680	254	2046	3301	1869	1380	1188	3400
CDS	55266	56447	1182	+	A10051;CDW43_RS00255aminotransferase class V-fold PLP-dependent enzyme;;	17	4047	4607	1442	51	34	77	65	3949	3511	512	2365	4786	2924	2808	2408	6322
CDS	56422	58125	1704	-	A10052;CDW43_RS00260AAA family ATPase;;	93	7784	8828	3261	116	109	145	184	6824	5437	1166	7615	14412	9114	8348	6781	22642
CDS	58134	59219	1086	-	A10053;CDW43_RS002653-dehydroquinate synthase;;	103	11620	13652	4406	207	163	403	293	10751	9281	2793	13757	22230	12449	8829	7733	27984
CDS	59225	59752	528	-	A10054;CDW43_RS00270shikimate kinase AroK;;	45	8799	9336	3157	137	158	273	225	6012	5239	1600	6989	10734	5673	3074	2908	11436
CDS	59845	62022	2178	-	A10055;CDW43_RS00275type IV pilus secretin PilQ;;	255	23821	36544	12749	768	811	602	794	17747	15306	3706	62262	99074	53263	21115	18860	83473
CDS	62033	62581	549	-	A10056;CDW43_RS00280pilus assembly protein PilP;;	64	6344	9895	3948	79	36	110	126	4943	3993	785	18375	27945	16430	4809	4523	26121
CDS	62581	63168	588	-	A10057;CDW43_RS00285type 4a pilus biogenesis protein PilO;;	74	6624	10738	4148	75	48	133	130	5550	4833	1154	19634	29982	16414	5140	4742	26662
CDS	63171	63731	561	-	A10058;CDW43_RS00290PilN domain-containing protein;;	73	8014	12983	5242	152	84	147	159	6747	6184	1594	18920	26249	14292	4416	4554	20297
CDS	63731	64789	1059	-	A10059;CDW43_RS00295pilus assembly protein PilM;;	208	14339	23663	8490	351	246	323	334	13810	13654	4411	33193	45536	23189	11681	9993	34843
CDS	64978	67377	2400	+	A10060;CDW43_RS00300penicillin-binding protein 1A;;	88	24443	27458	9408	305	292	534	425	21795	22123	3534	9683	16662	10653	8304	7565	23188
CDS	67525	68622	1098	-	A10061;CDW43_RS16765methyl-accepting chemotaxis protein;;	163	68117	99145	2248	1396	1257	1332	1195	21387	58775	18640	13317	15326	7564	3751	3243	7283
CDS	68726	69868	1143	+	A10062;CDW43_RS00310NnrS family protein;;	194	29218	41878	2157	491	483	552	487	8936	18981	5396	10405	12810	6041	4010	3094	6467
CDS	69878	70315	438	+	A10063;CDW43_RS00315Rrf2 family transcriptional regulator;;	323	58129	65306	2948	807	742	904	657	14300	27587	8806	14082	17966	9401	5448	4290	9712
CDS	70337	71011	675	-	A10064;CDW43_RS00320iron-sulfur cluster repair protein YtfE;;	727	135600	150076	5413	1433	1477	1618	1766	27080	63623	36036	17773	21287	9984	4144	3548	7749
CDS	71900	73375	1476	-	A10065;CDW43_RS00325M48 family metalloprotease;;	177	57709	43742	24314	837	745	1539	943	24986	18487	3326	22205	29466	15643	13714	11446	28734
CDS	73403	73603	201	-	A10066;CDW43_RS0033050S ribosomal protein L31;;	113	44682	33992	19571	1995	2157	3512	2286	32227	24770	3781	14047	18735	11111	9848	8923	21093
CDS	73727	74305	579	-	A10067;CDW43_RS00335methyltransferase domain-containing protein;;	13	6440	6714	1846	281	324	281	183	2292	2502	704	4557	5757	2654	1725	1623	4766
CDS	74302	75753	1452	-	A10068;CDW43_RS00340TrkH family potassium uptake protein;;	76	9473	8773	3288	85	110	157	171	5190	4860	1335	4524	6040	2853	3967	2916	6400
CDS	75760	77271	1512	-	A10069;CDW43_RS00345apolipoprotein N-acyltransferase;;	75	8008	8301	2972	164	166	251	404	5970	4669	1007	5374	8362	4975	5910	4584	10096
CDS	77271	78140	870	-	A10070;CDW43_RS00350transporter associated domain-containing protein;;	56	6717	6892	2318	273	280	588	935	5013	3834	881	6719	10107	6042	6775	5628	12464
CDS	78137	78601	465	-	A10071;CDW43_RS00355rRNA maturation RNase YbeY;;	29	4571	4851	1708	67	57	102	61	3062	2334	564	3018	4299	2779	2552	2199	5597
CDS	78598	79467	870	-	A10072;CDW43_RS00360PhoH family protein;;	133	14062	14385	5792	258	208	259	155	9761	8068	1883	7725	10944	6254	8681	6618	12200
CDS	79594	80934	1341	-	A10073;CDW43_RS00365tRNA (N6-isopentenyl adenosine(37)-C2)-methylthiotransferase MiaB;;	176	17875	15531	10031	511	505	999	572	21715	15787	2313	4890	8334	5258	10010	9145	13272
CDS	81523	81957	435	+	A10074;CDW43_RS00370heme-binding protein;;	161	17173	19228	7492	412	402	461	817	8122	7838	2851	12453	16295	8239	7931	5930	13841
CDS	82091	82849	759	-	A10075;CDW43_RS00375thrombospondin;;	648	51325	75326	60127	6577	3979	3879	11712	25256	26803	6801	41696	51963	25548	27359	25923	45117
riboswitch	82867	82946	80	.	Ribo01;riboswitch c-di-GMP;;	94	7323	9935	7855	1194	783	905	2239	3901	4136	1100	8315	10304	4882	4929	4671	8647
CDS	83161	84903	1743	+	A10076;CDW43_RS0038030s ribosomal protein S12 methylthiotransferase accessory protein YcaO;;	104	13679	15317	3713	636	800	682	413	11610	13977	2390	16301	22144	11696	9554	7864	21126
CDS	84987	86561	1575	-	A10077;CDW43_RS00385cation:proton antiporter;;	82	8179	8755	3123	230	236	322	409	4154	5606	1270	11696	14739	7198	4330	3589	11095
CDS	86717	87013	297	-	A10078;CDW43_RS00390DUF1840 domain-containing protein;;	14	1699	1859	778	78	89	92	183	971	1184	320	3112	3857	2009	948	756	2816
CDS	87261	87581	321	-	A10079;CDW43_RS00395hypothetical protein;;	12	3040	3182	1151	51	75	148	217	1805	1997	610	4422	5537	2739	1200	962	3590
CDS	87698	87973	276	-	A10080;CDW43_RS00400DUF1971 domain-containing protein;;	16	4262	4199	1326	138	173	275	256	2167	2433	799	6219	7595	3993	1819	1488	5360
CDS	88106	88717	612	-	A10081;CDW43_RS00405uracil-DNA glycosylase family protein;;	22	4919	5976	1264	193	195	187	120	1482	2066	617	6822	6507	2889	2132	1557	3483
CDS	88758	89012	255	-	A10082;CDW43_RS00410DUF1488 family protein;;	12	4227	5547	850	222	197	226	145	1078	1532	692	4373	3909	1542	1152	899	1708
CDS	89199	90485	1287	+	A10083;CDW43_RS00415MgtC/SapB family protein;;	36	3961	3992	1286	137	167	192	144	3083	3495	672	5185	6708	3494	2835	2457	5585
CDS	90724	92187	1464	-	A10084;CDW43_RS00420phospholipase D family protein;;	39	6800	5323	1540	171	111	199	211	4613	4833	1352	6285	8756	4528	3643	2887	6334
CDS	92499	94337	1839	+	A10085;CDW43_RS00425fibronectin type III domain-containing protein;;	38	5782	5206	2202	351	408	1049	2018	2822	3067	1056	7605	9771	5471	2522	2479	8160
CDS	94553	95608	1056	+	A10086;CDW43_RS00430phosphate ABC transporter substrate-binding protein PstS;;	21	2132	2379	797	67	143	291	235	1485	1685	498	2169	2841	1719	1070	910	3033
CDS	95670	96677	1008	-	A10087;CDW43_RS00435YihY/virulence factor BrkB family protein;;	11	2303	2863	1060	48	60	89	75	1308	1686	331	2164	2867	1628	1056	935	2416
CDS	96745	97143	399	-	A10088;CDW43_RS00440DUF1801 domain-containing protein;;	11	1803	1904	683	42	30	43	32	1269	1443	314	925	1316	710	342	311	1298
CDS	97314	98261	948	-	A10089;CDW43_RS00445malate dehydrogenase;;	7	3180	3062	1078	64	64	77	57	1679	1815	617	3948	5256	2792	1516	1246	4437
CDS	98362	98700	339	-	A10090;CDW43_RS00450hypothetical protein;;	20	1415	1594	567	47	39	58	47	1007	1003	327	1734	2603	1318	834	737	2809
CDS	98876	99418	543	-	A10091;CDW43_RS00455hypothetical protein;;	5	2104	2370	911	38	45	52	38	1847	1993	580	1581	2508	1494	1018	803	2877
CDS	99568	100083	516	-	A10092;CDW43_RS00460phosphate-starvation-inducible PsiE family protein;;	10	2542	2550	871	60	41	37	83	1965	2058	509	1672	2561	1398	1056	819	2627
CDS	100284	101009	726	-	A10093;CDW43_RS00465MOSC domain-containing protein;;	47	2834	3360	814	30	34	59	104	2950	3143	595	5254	8030	4638	2297	2170	7471
CDS	101548	102711	1164	-	A10094;CDW43_RS00470cytochrome P450;;	222	20454	21530	4863	320	391	449	530	11489	13168	3110	29630	40177	20854	9845	9289	28877
CDS	103206	103880	675	+	A10095;CDW43_RS00475DNA repair protein RadC;;	4	2270	2807	454	19	5	23	21	1078	1306	555	2110	3377	2092	1219	973	3215
CDS	104007	105041	1035	+	A10096;CDW43_RS16565TonB-dependent receptor;;	72	48852	45142	5610	47	31	88	51	2024	2124	8139	1582	2356	1187	1996	1555	2461
CDS	105060	106043	984	+	A10097;CDW43_RS16570TonB-dependent receptor;;	22	16779	15451	1852	51	82	127	54	1386	1828	1610	1584	2084	972	1030	839	1637
CDS	106115	107251	1137	+	A10098;CDW43_RS00485PepSY-associated TM helix domain-containing protein;;	24	6456	8913	1715	42	40	58	38	2214	2998	824	3934	5685	2835	2180	2078	3985
CDS	107260	107994	735	-	A10099;CDW43_RS00490cytochrome b/b6 domain-containing protein;;	64	13573	14949	4804	127	88	124	216	5156	5147	1956	12347	17937	7925	5696	4689	12826
CDS	108092	108523	432	-	A10100;CDW43_RS00495hemerythrin domain-containing protein;;	13	9915	10352	2782	128	112	83	127	2881	2724	740	3393	5122	2929	2421	1901	5575
CDS	108525	109358	834	-	A10101;CDW43_RS00500thymidylate synthase;;	32	18179	19367	6038	243	271	280	302	5024	4794	1504	4947	8327	4524	3449	3171	9037
CDS	109486	110424	939	-	A10102;CDW43_RS00505sigma-54 dependent transcriptional regulator;;	26	31456	30116	7855	65	104	190	117	4973	5179	1810	4303	6647	3830	3262	2771	7751
CDS	110467	111195	729	-	A10103;CDW43_RS00510sulfite exporter TauE/SafE family protein;;	38	25794	20846	6712	79	95	219	153	3073	3167	1439	4593	6480	3391	2720	2264	6415
CDS	111624	112028	405	+	A10104;CDW43_RS00515cytochrome c;;	78	227089	306109	91676	236	188	572	113	3489	3966	24821	3571	4151	1865	3309	2515	3646
CDS	112077	112610	534	-	A10105;CDW43_RS00520hypothetical protein;;	59	70155	95922	19235	364	419	654	621	2826	2917	7456	5061	6100	3336	2752	2303	5482
CDS	112666	114171	1506	-	A10106;CDW43_RS00525exopolyphosphatase;;	121	15650	29190	5857	286	315	395	522	7452	6370	2482	5714	9001	5687	6150	5540	12622
CDS	114306	115022	717	-	A10107;CDW43_RS00530phosphate signaling complex protein PhoU;;	26	5078	5171	2342	528	787	385	2152	3989	4149	750	6665	9389	4910	2952	2713	8407
CDS	115046	115888	843	-	A10108;CDW43_RS00535phosphate ABC transporter ATP-binding protein PstB;;	21	3134	3150	1332	156	173	113	1101	2922	3155	587	5696	8573	4744	2274	2199	7943
CDS	115888	117555	1668	-	A10109;CDW43_RS00540phosphate ABC transporter permease PstA;;	39	5304	5346	2263	289	284	287	1201	3573	3878	769	5964	8397	4533	3076	2633	7315
CDS	117568	119844	2277	-	A10110;CDW43_RS00545ABC transporter permease subunit;;	38	8328	8663	3621	579	592	2404	2347	5344	6597	1413	9199	11573	6155	4490	3695	8665
CDS	120000	120956	957	-	A10111;CDW43_RS00550PstS family phosphate ABC transporter substrate-binding protein;;	21	5858	5360	3254	4770	6954	23129	32685	2973	3086	2618	3909	12468	3009	1704	1561	6016
CDS	121098	122387	1290	-	A10112;CDW43_RS00555phosphate regulon sensor histidine kinase PhoR;;	79	7119	8871	2478	650	497	2730	607	3961	5090	1389	7305	9938	4982	4164	3348	7902
CDS	122400	123092	693	-	A10113;CDW43_RS00560phosphate regulon transcriptional regulator PhoB;;	28	4752	5332	1696	973	1333	4144	1437	2447	3000	921	4761	5979	2767	2095	1683	4430
CDS	123174	124397	1224	-	A10114;CDW43_RS00565organoarsenical effux MFS transporter ArsJ;;	23	3842	3039	1177	136	98	491	160	2689	2565	441	2014	3542	1997	2543	1664	4239
CDS	124456	126105	1650	-	A10115;CDW43_RS00570inorganic phosphate transporter;;	111	11526	9398	3852	264	232	190	48	9922	10567	1629	4207	6931	3909	7090	4817	7797
CDS	126242	128080	1839	+	A10116;CDW43_RS00575protein-disulfide reductase DsbD;;	98	11996	11166	4055	290	352	549	332	6594	8676	1598	15339	18374	9129	5725	4527	10984
CDS	128216	128653	438	+	A10117;CDW43_RS00580type II 3-dehydroquinate dehydratase;;	101	6086	5344	2542	219	244	340	273	3952	3352	665	3948	6476	3852	2707	2088	6012
CDS	128663	129130	468	+	A10118;CDW43_RS00585acetyl-CoA carboxylase biotin carboxyl carrier protein;;	80	7877	7356	3645	171	140	205	169	5305	4717	1122	5975	9653	5649	3586	3323	9326
CDS	129185	130525	1341	+	A10119;CDW43_RS00590acetyl-CoA carboxylase biotin carboxylase subunit;;	180	16460	15997	6020	130	94	278	229	18503	15895	2421	20887	37725	21892	17763	15460	34254
CDS	130537	131406	870	+	A10120;CDW43_RS0059550S ribosomal protein L11 methyltransferase;;	119	6841	6830	2212	36	39	76	77	11355	7403	1013	10584	20437	12545	11357	9701	21562
CDS	131399	132400	1002	+	A10121;CDW43_RS00600tRNA dihydrouridine synthase DusB;;	132	12059	11375	3297	305	419	282	133	11518	9246	1399	17420	26351	14477	11858	9689	23337
CDS	132397	132687	291	+	A10122;CDW43_RS00605DNA-binding transcriptional regulator Fis;;	50	11225	10867	3244	235	287	194	80	7010	6668	1353	8373	11245	5708	3382	3109	8907
CDS	132717	134282	1566	+	A10123;CDW43_RS00610bifunctional phosphoribosylaminoimidazolecarboxamide formyltransferase/IMP cyclohydrolase;;	217	16167	18697	6066	333	264	281	124	20767	17663	2037	25326	41309	25130	17617	15398	43649
CDS	134296	136929	2634	+	A10124;CDW43_RS00615class I adenylate cyclase;;	180	13788	15435	6050	273	292	411	288	14884	12296	1938	16996	26440	16197	10524	8969	28292
CDS	136983	138011	1029	+	A10125;CDW43_RS00620N-acetyl-gamma-glutamyl-phosphate reductase;;	250	23233	23738	6745	595	495	735	684	14284	17413	5067	26675	31691	15532	13182	10759	22092
CDS	138011	138715	705	+	A10126;CDW43_RS00625hypothetical protein;;	13	8316	7576	2787	118	86	173	183	5134	5449	1042	7040	8890	4667	2280	2291	7116
CDS	138724	139161	438	+	A10127;CDW43_RS00630polymer-forming cytoskeletal protein;;	17	6992	6438	1980	160	158	198	221	3893	4082	823	6774	9093	5009	2358	2071	7913
CDS	139312	139656	345	+	A10128;CDW43_RS00635iron-sulfur cluster insertion protein ErpA;;	661	87535	95430	10390	3582	4636	3116	4790	16721	36415	12591	79200	87038	41765	10650	9026	24814
CDS	139785	141074	1290	+	A10129;CDW43_RS00640DUF2254 domain-containing protein;;	61	8404	7910	2516	274	218	237	156	5699	5947	1190	7454	10232	5637	2934	2495	7888
CDS	141153	141779	627	+	A10130;CDW43_RS00645TetR/AcrR family transcriptional regulator;;	21	4954	5890	1891	116	119	133	77	3201	2927	1318	2146	3353	2166	1639	1304	2885
CDS	141783	142955	1173	+	A10131;CDW43_RS00650efflux RND transporter periplasmic adaptor subunit;;	26	3869	4652	1838	120	120	216	252	4766	3632	1222	2483	4380	2662	2238	1748	4103
CDS	142958	146104	3147	+	A10132;CDW43_RS00655efflux RND transporter permease subunit;;	86	8152	10178	2795	198	232	388	800	14283	9560	2606	8708	15816	9901	8696	7386	15705
CDS	146101	147543	1443	+	A10133;CDW43_RS00660efflux transporter outer membrane subunit;;	62	3721	5356	1558	103	166	134	582	10017	5662	1560	6638	11807	7973	6497	5591	14470
CDS	147623	147802	180	+	A10134;CDW43_RS00665PLDc N-terminal domain-containing protein;;	145	4501	3954	1495	350	367	319	420	3266	2679	776	6400	9519	5464	7216	4885	10173
CDS	147993	150053	2061	+	A10135;CDW43_RS00670BCCT family transporter;;	115	14133	13279	3977	194	181	286	248	9812	9009	2038	8400	13935	8787	6490	5435	14709
CDS	150538	151455	918	+	A10136;CDW43_RS00675LysR family transcriptional regulator;;	34	3202	5095	912	22	23	27	33	1185	1249	759	869	1154	600	536	400	1122
CDS	151542	152948	1407	+	A10137;CDW43_RS00680diguanylate cyclase;;	149	19395	25092	9070	884	919	667	559	7824	9573	2352	7262	8648	4331	5637	4675	6174
CDS	152902	153456	555	-	A10138;CDW43_RS00685lactoylglutathione lyase;;	62	8022	9318	3868	170	151	225	211	3297	3833	877	6456	7889	4127	2359	2222	5688
CDS	153483	154436	954	-	A10139;CDW43_RS00690magnesium/cobalt transporter CorA;;	84	5762	6678	2047	187	188	315	313	3889	4438	1086	6019	7909	3488	2529	2176	6383
CDS	154817	155440	624	-	A10140;CDW43_RS00695methyltransferase;;	15	1520	1601	608	42	62	61	60	2579	1659	342	814	1261	1051	1450	1260	2758
CDS	155459	156817	1359	-	A10141;CDW43_RS00700tRNA uridine-5-carboxymethylaminomethyl(34) synthesis GTPase MnmE;;	66	5155	5509	1930	66	39	77	82	8011	4586	1065	2726	5952	4711	8357	6854	14017
CDS	156875	158518	1644	-	A10142;CDW43_RS00705membrane protein insertase YidC;;	203	16573	13855	9142	218	174	577	328	28285	17274	3396	7046	14001	10588	15897	13323	30453
CDS	158511	158747	237	-	A10143;CDW43_RS00710membrane protein insertion efficiency factor YidD;;	89	7709	5606	4756	129	191	452	208	9547	7320	1107	3387	7549	5650	8163	6802	15006
CDS	158732	159085	354	-	A10144;CDW43_RS00715ribonuclease P protein component;;	184	29856	21991	18598	430	406	1097	546	33204	25980	4270	6890	14667	10165	17171	13556	25754
CDS	159114	159248	135	-	A10145;CDW43_RS0072050S ribosomal protein L34;;	212	18582	15993	13153	716	604	1280	735	24998	18169	3201	6644	13247	8416	14229	11347	23804
CDS	159514	160878	1365	+	A10146;CDW43_RS00725chromosomal replication initiator protein DnaA;;	91	14773	13906	6891	418	446	451	458	15540	13967	2068	7543	12105	7312	5668	5242	17611
CDS	160893	161996	1104	+	A10147;CDW43_RS00730DNA polymerase III subunit beta;;	116	13631	14191	5667	249	195	438	410	10604	8194	1866	8619	13124	8319	6865	6380	17819
CDS	162062	163264	1203	-	A10148;CDW43_RS00735heme biosynthesis HemY N-terminal domain-containing protein;;	99	10535	10032	2633	169	113	209	201	11668	11985	1309	10619	15799	8338	5872	4720	12694
CDS	163261	164295	1035	-	A10149;CDW43_RS00740uroporphyrinogen-III C-methyltransferase;;	81	17399	20846	5561	312	321	454	380	15283	17018	2823	14999	21680	10899	8151	6559	15923
CDS	164285	165052	768	-	A10150;CDW43_RS00745uroporphyrinogen-III synthase;;	54	9942	11037	2960	289	290	424	347	6823	7981	1371	13734	17606	8400	6422	5166	11761
CDS	165042	165971	930	-	A10151;CDW43_RS00750hydroxymethylbilane synthase;;	129	8361	9682	2304	413	408	581	487	5367	7268	1984	21887	24977	11830	9461	7597	14787
CDS	166091	167473	1383	+	A10152;CDW43_RS00755argininosuccinate lyase;;	66	8052	7722	4406	214	248	442	302	10590	9729	1713	9784	12980	7158	5853	5341	11035
CDS	167565	168929	1365	+	A10153;CDW43_RS00760DUF5924 family protein;;	14	3497	3574	1513	24	20	36	14	2561	2008	278	1507	2606	1699	1213	1111	3433
CDS	168926	169141	216	-	A10154;CDW43_RS00765hypothetical protein;;	6	1399	1465	255	5	6	7	6	489	425	84	426	764	528	263	278	967
CDS	169168	169518	351	-	A10155;CDW43_RS00770DUF3325 domain-containing protein;;	29	1219	1317	145	10	6	13	12	270	295	63	432	708	494	464	375	871
CDS	169518	171161	1644	-	A10156;CDW43_RS00775PepSY-associated TM helix domain-containing protein;;	212	16172	19309	1096	34	37	44	33	2351	2679	2256	1795	2870	1903	2273	1689	3236
CDS	171158	171439	282	-	A10157;CDW43_RS00780DUF3649 domain-containing protein;;	78	6605	8663	397	15	27	24	22	987	1091	2060	936	1404	825	755	555	1292
CDS	171975	174056	2082	-	A10158;CDW43_RS00785TonB-dependent siderophore receptor;;	104	8228	13746	1044	60	80	133	75	2077	2740	1677	2526	3965	2165	2063	1670	3823
CDS	174064	174306	243	-	A10159;CDW43_RS00790sigma factor;;	62	4638	6297	433	40	43	47	27	864	1020	1367	975	1248	755	741	605	1204
CDS	174543	175442	900	+	A10160;CDW43_RS00795IS982 family transposase;;	21	6970	5733	1446	98	78	147	136	2153	2437	488	2823	3874	2043	1554	1227	3220
CDS	175608	177152	1545	+	A10161;CDW43_RS00800Fic family protein;;	18	3003	2635	184	71	39	101	28	2597	4532	1299	3572	5496	3495	2152	1739	4741
CDS	177218	177400	183	+	A10162;CDW43_RS00805HigA family addiction module antitoxin;;	8	714	398	30	13	12	27	7	535	712	159	491	739	444	317	290	764
CDS	177621	179969	2349	-	A10163;CDW43_RS00810TonB-dependent siderophore receptor;;	89	10894	5422	425	132	117	115	82	8606	9715	1884	8032	10251	5684	3583	3135	10113
CDS	180186	181184	999	-	A10164;CDW43_RS00815FecR domain-containing protein;;	150	3892	5812	424	22	12	40	27	548	725	672	549	846	492	490	376	731
CDS	181181	181690	510	-	A10165;CDW43_RS00820sigma-70 family RNA polymerase sigma factor;;	134	3500	5290	314	38	27	40	27	644	856	1705	733	982	600	586	524	809
CDS	181898	183298	1401	-	A10166;CDW43_RS16475TonB-dependent siderophore receptor;;	69	3814	4211	1447	114	116	144	167	2831	3255	648	3172	4069	2302	1590	1263	4101
CDS	183305	184324	1020	-	A10167;CDW43_RS16480TonB-dependent siderophore receptor;;	86	2828	2960	855	50	65	61	57	1247	1562	393	1278	2108	1240	924	786	2008
CDS	184400	185353	954	-	A10168;CDW43_RS00830FecR domain-containing protein;;	55	4097	5393	716	39	49	39	48	962	1179	580	1061	1552	975	765	687	1784
CDS	185359	185856	498	-	A10169;CDW43_RS00835sigma-70 family RNA polymerase sigma factor;;	41	2987	3722	455	60	53	81	84	792	1004	741	1380	1679	897	893	803	1614
CDS	186009	188456	2448	-	A10170;CDW43_RS00840TonB-dependent receptor;;	411	7677	9947	1990	138	111	225	218	3473	4104	1040	3772	6057	3911	3932	3160	7795
CDS	188791	189732	942	-	A10171;CDW43_RS00845FecR domain-containing protein;;	106	11595	15342	2289	70	98	151	94	3235	3824	2144	4017	5848	3111	2729	2203	5240
CDS	189746	190237	492	-	A10172;CDW43_RS00850sigma-70 family RNA polymerase sigma factor;;	28	9908	10957	1647	52	66	92	78	2044	2536	2477	2467	3357	1639	903	847	2674
CDS	190727	191182	456	-	A10173;CDW43_RS00855TerB family tellurite resistance protein;;	19	4506	4650	1568	102	132	177	117	1085	1351	476	4342	4982	2200	828	817	3366
CDS	191235	192365	1131	-	A10174;CDW43_RS00860GNAT family N-acetyltransferase/peptidase C39 family protein;;	47	4021	3360	1628	53	46	153	126	1755	2078	598	5748	7948	4752	3134	2737	8521
CDS	192349	193419	1071	-	A10175;CDW43_RS00865DUF2817 domain-containing protein;;	48	3795	3214	1389	182	166	195	168	2266	3081	881	5282	6684	3224	2565	2236	6067
CDS	193587	195071	1485	+	A10176;CDW43_RS00870RimK family alpha-L-glutamate ligase;;	26	4366	4291	2187	173	145	171	133	4717	4267	713	4649	5789	3466	2259	1991	6698
CDS	195149	197206	2058	-	A10177;CDW43_RS00875TonB-dependent receptor;;	57	13330	20903	6342	250	282	349	350	22863	15903	4330	26630	42792	26145	16198	14176	40623
CDS	197359	198252	894	+	A10178;CDW43_RS00880DnaJ C-terminal domain-containing protein;;	69	12393	30107	3199	692	389	540	242	5723	11688	4041	5976	8541	4825	7496	5274	10491
CDS	198274	199659	1386	+	A10179;CDW43_RS00885DegQ family serine endoprotease;;	74	14767	22395	4748	350	237	546	391	6213	12540	3059	8029	11278	6605	7544	5824	12245
CDS	199771	200247	477	-	A10180;CDW43_RS00890nuclear transport factor 2 family protein;;	8	5257	6270	1900	141	236	137	59	2532	3917	4538	2550	3521	1845	1116	951	2929
CDS	200349	200924	576	+	A10181;CDW43_RS00895TetR/AcrR family transcriptional regulator;;	4	2425	2150	472	44	23	39	32	1772	2152	610	1170	1479	787	577	438	1380
CDS	201078	201449	372	+	A10182;CDW43_RS00900hypothetical protein;;	13	3686	2122	229	301	283	202	43	3156	3319	1075	3493	3807	1847	1107	934	2900
CDS	201727	202206	480	+	A10183;CDW43_RS00905bacterioferritin;;	40	11130	5079	1208	194	158	187	132	8918	9358	3548	7091	9800	5126	5489	3996	10541
NCodA	202501	202900	400	.	Ncod194;NCod400Ncod;;	330	69515	21204	2328	1661	1649	1598	1012	38977	41104	5672	19556	24978	15008	9131	6783	21424
CDS	202914	203828	915	-	A10184;CDW43_RS00910type II toxin-antitoxin system PemK/MazF family toxin;;	18	18668	7351	561	787	1032	585	353	9948	9437	2165	8784	9920	5406	2527	2243	9147
CDS	203862	205229	1368	-	A10185;CDW43_RS00915bifunctional UDP-N-acetylglucosamine diphosphorylase/glucosamine-1-phosphate N-acetyltransferase GlmU;;	31	8402	8442	2381	91	105	222	164	8639	6028	1392	5739	7632	4285	3391	3018	8715
CDS	205325	205747	423	-	A10186;CDW43_RS00920F0F1 ATP synthase subunit epsilon;;	53	26938	31933	5274	84	65	113	196	39582	23995	3887	8486	17504	10472	11974	11336	25356
CDS	205766	207142	1377	-	A10187;CDW43_RS00925F0F1 ATP synthase subunit beta;;	2035	63389	75376	11910	492	424	449	722	110302	63724	12411	48970	100910	66648	69907	67185	155057
CDS	207193	208059	867	-	A10188;CDW43_RS00930F0F1 ATP synthase subunit gamma;;	186	26501	27910	5321	153	79	179	336	44692	25568	4148	21576	45807	30876	34441	32623	76502
CDS	208074	209615	1542	-	A10189;CDW43_RS00935F0F1 ATP synthase subunit alpha;;	806	61323	64723	14936	300	193	417	555	95755	56801	12793	46552	96628	65792	72055	66788	154286
CDS	209640	210170	531	-	A10190;CDW43_RS00940F0F1 ATP synthase subunit delta;;	231	35468	33836	10145	111	61	262	229	39756	23517	4682	15607	32415	21137	25711	24309	49831
CDS	210183	210653	471	-	A10191;CDW43_RS00945F0F1 ATP synthase subunit B;;	369	43401	41996	14384	191	155	565	372	45829	27564	5622	24508	51930	35825	39210	39049	76372
CDS	210699	210932	234	-	A10192;CDW43_RS00950F0F1 ATP synthase subunit C;;	140	14128	12506	5688	144	63	494	255	16451	8912	1775	9619	19981	12957	16579	15845	31262
CDS	210990	211889	900	-	A10193;CDW43_RS00955F0F1 ATP synthase subunit A;;	300	54503	49743	30596	674	438	1549	794	57155	39913	6773	12739	24415	16482	20644	16805	35146
CDS	211897	212271	375	-	A10194;CDW43_RS00960ATP synthase subunit I;;	80	47736	40949	24389	659	577	1323	733	39379	32583	4775	9958	17896	10636	13537	11817	21959
CDS	212559	213422	864	-	A10195;CDW43_RS00965ParB/RepB/Spo0J family partition protein;;	43	13689	13805	5748	252	170	240	233	13348	10640	2247	8524	14370	8259	5600	5197	16628
CDS	213439	214221	783	-	A10196;CDW43_RS00970AAA family ATPase;;	171	18147	15376	8961	421	389	375	428	16727	14149	2501	10090	18191	11296	9089	7727	22641
CDS	214227	214853	627	-	A10197;CDW43_RS0097516S rRNA (guanine(527)-N(7))-methyltransferase RsmG;;	34	11451	9545	5266	121	96	217	107	9890	9709	1332	3323	5522	2626	3664	2343	5678
CDS	214853	216736	1884	-	A10198;CDW43_RS00980tRNA uridine-5-carboxymethylaminomethyl(34) synthesis enzyme MnmG;;	240	25082	23211	13393	605	505	1226	456	18327	18740	2694	19857	26246	15017	11112	8988	21776
CDS	216890	217042	153	+	A10199;CDW43_RS00985hypothetical protein;;	0	700	1191	485	84	80	373	414	314	367	75	143	231	112	80	74	226
CDS	217039	217938	900	-	A10200;CDW43_RS00990IS982 family transposase;;	23	9814	7819	1938	125	147	175	142	3304	3482	673	4033	5548	3111	2381	1882	4693
CDS	217984	218259	276	+	A10201;CDW43_RS00995diacylglycerol kinase;;	24	6877	5666	986	251	305	564	563	4861	4287	987	3935	4889	2657	1936	1715	4545
CDS	218256	219032	777	-	A10202;CDW43_RS01000prolipoprotein diacylglyceryl transferase;;	29	6106	5650	2166	195	198	468	498	4646	4254	843	2504	3086	1707	1669	1307	3014
CDS	219313	220032	720	+	A10203;CDW43_RS01005TorF family putative porin;;	1832	82095	98101	40215	23	9	136	206	847	654	444	536	796	424	590	392	709
CDS	220088	220426	339	+	A10204;CDW43_RS01010P-II family nitrogen regulator;;	1105	24845	31591	10171	43	40	94	104	1043	1191	370	849	1219	665	494	451	874
CDS	220445	221728	1284	+	A10205;CDW43_RS01015ammonium transporter;;	2812	51926	72015	14242	143	111	242	359	3196	3412	855	3059	4767	2635	3673	2632	4676
CDS	221800	222864	1065	-	A10206;CDW43_RS01020uroporphyrinogen decarboxylase;;	80	7305	10544	2241	98	96	112	155	11729	10474	1183	6222	10395	5900	5866	4719	13464
CDS	222998	224404	1407	-	A10207;CDW43_RS01025FAD-dependent oxidoreductase;;	265	22645	35692	5952	362	296	202	738	30561	31390	3546	22753	33579	16813	18395	15417	36710
CDS	224428	228918	4491	-	A10208;CDW43_RS01030glutamate synthase large subunit;;	1308	128534	170161	46577	3361	2585	4647	3889	128262	155449	20427	110913	160596	84095	87319	72396	155082
CDS	229153	229647	495	+	A10209;CDW43_RS010355-(carboxyamino)imidazole ribonucleotide mutase;;	82	6565	6358	3031	296	311	489	284	7532	6695	1139	5458	8318	4605	4573	4307	9021
CDS	229662	230792	1131	+	A10210;CDW43_RS010405-(carboxyamino)imidazole ribonucleotide synthase;;	57	8975	8335	4396	163	148	349	283	11164	8733	1356	6832	11483	7560	6913	7030	15510
CDS	230792	231067	276	+	A10211;CDW43_RS01045SelT/SelW/SelH family protein;;	28	3437	3755	1608	62	58	145	192	2882	2206	352	2499	3907	2626	2481	2271	5014
CDS	231121	233403	2283	-	A10212;CDW43_RS01050type I DNA topoisomerase;;	96	22814	22243	6817	339	240	548	298	31340	28601	4220	19554	33837	19364	14156	12834	39216
CDS	233488	233955	468	-	A10213;CDW43_RS01055DUF494 domain-containing protein;;	108	62226	66136	15468	836	981	736	594	38173	39572	6499	36160	48909	25203	11506	9168	39606
CDS	233979	235100	1122	-	A10214;CDW43_RS01060DNA-processing protein DprA;;	86	18306	19264	5504	284	299	357	238	14001	14956	2494	21139	32407	18195	10407	9063	31895
CDS	235111	236145	1035	-	A10215;CDW43_RS01065LysM domain-containing protein;;	185	23541	24359	7849	456	482	538	496	20216	22057	5844	36627	47714	25624	14225	12428	40122
CDS	236329	236646	318	+	A10216;CDW43_RS01070cytochrome c;;	244	13884	18074	8603	1009	1236	1410	1093	8682	10061	2414	29381	31469	15061	7309	6378	19697
CDS	236685	237188	504	+	A10217;CDW43_RS01075peptide deformylase;;	152	19480	22606	11332	536	677	837	669	13419	14213	2558	23810	26015	12021	5173	4658	16263
CDS	237197	238129	933	+	A10218;CDW43_RS01080methionyl-tRNA formyltransferase;;	86	16608	18829	8676	237	255	391	334	12116	12380	2117	16996	21701	11955	5538	5057	16320
CDS	238122	239429	1308	+	A10219;CDW43_RS0108516S rRNA (cytosine(967)-C(5))-methyltransferase RsmB;;	88	13137	13480	5227	162	155	262	248	10623	10743	1262	14863	21485	11959	6018	5146	17589
CDS	239407	239988	582	+	A10220;CDW43_RS01090DUF4390 domain-containing protein;;	80	6954	7642	3105	137	157	222	243	5317	5431	784	6786	10954	6193	3978	3082	10008
CDS	239973	242132	2160	+	A10221;CDW43_RS01095ATP-binding protein;;	85	13064	12031	5269	145	198	193	268	8648	8529	1291	11422	17858	10560	5322	4459	16775
CDS	242135	243409	1275	+	A10222;CDW43_RS01100sigma-54 dependent transcriptional regulator;;	102	16953	16167	6258	486	525	905	669	12601	13130	2627	23070	30796	16855	10779	9328	27285
CDS	243419	244792	1374	+	A10223;CDW43_RS01105Trk system potassium transporter TrkA;;	71	9677	9178	3587	179	165	229	230	8317	7942	1051	16620	25035	14842	9263	7948	23725
CDS	244832	245353	522	+	A10224;CDW43_RS01110YqgE/AlgH family protein;;	39	3495	3668	1237	42	56	86	87	3113	2433	365	5480	8856	5363	3298	2763	9226
CDS	245356	245769	414	+	A10225;CDW43_RS01115Holliday junction resolvase RuvX;;	28	6896	5508	2260	123	183	188	198	6489	5687	1082	7449	11680	6808	4185	3676	12683
CDS	245766	246296	531	+	A10226;CDW43_RS01120bifunctional pyr operon transcriptional regulator/uracil phosphoribosyltransferase PyrR;;	29	7008	6389	2457	166	176	185	170	6767	5895	1165	6431	9892	5544	4014	3262	10738
CDS	246286	247257	972	+	A10227;CDW43_RS01125aspartate carbamoyltransferase catalytic subunit;;	82	9267	8101	2499	197	149	267	194	8447	6856	1256	12695	21100	12711	8783	7573	22093
CDS	247257	248540	1284	+	A10228;CDW43_RS01130dihydroorotase;;	80	12063	9259	2054	175	128	220	153	11898	11847	1714	18038	30028	16711	14066	11301	29728
CDS	248559	248735	177	+	A10229;CDW43_RS01135DUF3012 domain-containing protein;;	13	1728	1105	378	9	8	11	8	2278	2054	333	1195	2146	1207	854	811	2498
CDS	248732	249496	765	+	A10230;CDW43_RS01140HAD family hydrolase;;	11	5464	3422	1388	62	65	65	64	12732	12018	937	4393	7045	4832	2790	2356	8544
CDS	250185	251021	837	-	A10232;CDW43_RS01150plastocyanin/azurin family copper-binding protein;;	243	40828	62500	16459	1666	1593	1803	2616	21751	20196	6118	19573	25570	12278	9445	7428	22266
CDS	251167	253386	2220	-	A10233;CDW43_RS01155NADP-dependent isocitrate dehydrogenase;;	98	14705	16465	5144	293	260	395	362	14508	14324	2840	14353	18643	9472	6452	5705	16439
CDS	253874	254896	1023	-	A10234;CDW43_RS01160ABC transporter ATP-binding protein;;	194	8902	10180	2339	175	93	162	146	6951	6281	1347	6796	10936	6537	6575	5213	13435
CDS	254893	256416	1524	-	A10235;CDW43_RS01165iron ABC transporter permease;;	351	12045	12475	2194	101	111	158	113	5134	4812	1069	8515	13474	8175	7489	5661	15249
CDS	256413	257450	1038	-	A10236;CDW43_RS01170extracellular solute-binding protein;;	420	17491	18674	3233	163	140	309	191	5646	5709	2491	12056	16685	9155	6758	6206	14035
CDS	257451	258263	813	-	A10237;CDW43_RS01175hypothetical protein;;	256	19470	20451	3034	141	158	314	208	4481	4713	6582	7512	10200	5217	4045	3413	8577
CDS	259557	261725	2169	+	A10238;CDW43_RS01185TonB-dependent receptor;;	437	51975	10105	23398	374	438	435	1587	5153	5611	3502	6530	9469	5302	4113	3524	11446
CDS	262548	262973	426	-	A10239;CDW43_RS01190plastocyanin/azurin family copper-binding protein;;	235	42251	33617	10564	743	724	779	1159	53497	47535	13562	280500	416645	210483	94614	85626	290176
CDS	263280	264356	1077	-	A10240;CDW43_RS01200AI-2E family transporter;;	22	6475	7212	1649	201	150	233	156	3676	3970	1540	6269	7929	3750	3081	2344	5803
CDS	264424	265599	1176	+	A10241;CDW43_RS01205efflux RND transporter periplasmic adaptor subunit;;	63	7512	6849	3026	345	342	557	241	2712	2943	797	8354	13059	7484	3556	3023	11498
CDS	265606	268770	3165	+	A10242;CDW43_RS01210efflux RND transporter permease subunit;;	84	14468	13557	5517	208	186	551	266	7736	7282	1632	17270	29616	18203	9941	8074	29439
CDS	268746	269276	531	-	A10243;CDW43_RS01215lipocalin family protein;;	12	3103	3435	1217	83	93	122	80	1675	1738	376	3069	3407	1966	1097	880	3069
CDS	269325	269582	258	+	A10244;CDW43_RS01220TIGR03643 family protein;;	13	1244	1379	544	25	25	24	8	727	722	163	1046	1068	440	330	260	706
CDS	269608	270003	396	-	A10245;CDW43_RS01225MAPEG family protein;;	11	2198	2201	959	28	42	42	36	1407	1391	336	1606	2107	938	667	602	1914
CDS	270061	271071	1011	-	A10246;CDW43_RS01230class 1 fructose-bisphosphatase;;	58	6574	7004	3204	177	217	226	221	6488	6250	1397	5887	7813	4706	2706	2605	9452
CDS	271231	272046	816	-	A10247;CDW43_RS01235formylmethanofuran dehydrogenase subunit C;;	130	11934	16218	3798	188	154	151	465	11822	9864	1684	12368	19770	10645	12338	9721	22732
CDS	272043	272945	903	-	A10248;CDW43_RS01240formylmethanofuran--tetrahydromethanopterin N-formyltransferase;;	139	13172	21692	3789	213	135	266	588	15777	14115	2501	19276	30732	17696	15391	12866	36722
CDS	272942	274609	1668	-	A10249;CDW43_RS01245formylmethanofuran dehydrogenase subunit A;;	217	21973	27595	7426	287	255	642	899	22807	19393	4526	28450	46245	25924	21194	18401	51813
CDS	274622	275896	1275	-	A10250;CDW43_RS01250formylmethanofuran dehydrogenase subunit B;;	121	17832	22307	7136	335	284	482	500	13933	13304	3881	17372	28183	16551	12014	10945	28595
CDS	275990	276535	546	-	A10251;CDW43_RS01255SPOR domain-containing protein;;	40	9776	9902	3984	115	107	195	208	7079	6612	1493	7370	11006	6591	3999	3760	11668
CDS	276598	278361	1764	-	A10252;CDW43_RS01260arginine--tRNA ligase;;	99	22697	21976	10100	453	422	987	742	24459	20655	3765	11652	18902	11336	10690	9327	24073
CDS	278439	280613	2175	-	A10253;CDW43_RS01265primosomal protein N';;	47	15076	13339	3513	322	290	303	261	8741	9972	2120	10408	13964	7312	4832	3726	11935
CDS	280859	282463	1605	-	A10254;CDW43_RS01270Na/Pi symporter;;	18	3821	3856	1249	81	47	102	82	2992	3884	796	3217	3854	1959	1128	994	2810
CDS	282571	283056	486	+	A10255;CDW43_RS01275type 3 dihydrofolate reductase;;	57	11407	8984	3767	370	456	309	196	7339	8353	1991	10708	12868	6356	3748	3140	8872
CDS	283053	283289	237	-	A10256;CDW43_RS01280TIGR02647 family protein;;	42	10465	6817	2653	472	631	338	250	5414	6457	1884	10071	11539	5607	3050	2699	7470
CDS	283693	283941	249	+	A10257;CDW43_RS01285hypothetical protein;;	67	34609	21965	7911	696	715	623	436	9168	11586	3721	36351	38637	17264	5636	4647	22106
CDS	283953	284297	345	+	A10258;CDW43_RS01290pentapeptide repeat-containing protein;;	82	28737	20473	7157	608	624	483	488	9429	11800	2855	43121	46472	21896	6402	5599	28274
CDS	284301	285044	744	-	A10259;CDW43_RS01295twin-arginine translocase subunit TatC;;	62	29531	25099	7499	447	433	350	181	15139	15933	2168	21340	25749	13552	5629	4801	20731
CDS	285034	285345	312	-	A10260;CDW43_RS01300Sec-independent protein translocase protein TatB;;	22	9514	7599	2391	492	416	348	138	8910	8686	1161	6492	9665	5226	5238	4174	9857
CDS	285360	285605	246	-	A10261;CDW43_RS01305twin-arginine translocase TatA/TatE family subunit;;	11	8017	4229	924	416	422	314	101	7237	7153	1398	5436	7744	3991	4334	3429	8265
CDS	285615	285953	339	-	A10262;CDW43_RS01310histidine triad nucleotide-binding protein;;	61	12270	10468	3248	1459	2076	1078	372	8710	9039	2211	10692	14240	8195	6261	5313	15341
CDS	285950	286270	321	-	A10263;CDW43_RS01315phosphoribosyl-ATP diphosphatase;;	52	7597	7552	2395	557	766	532	227	6414	5996	1096	9091	13489	7828	5780	4980	15259
CDS	286267	286650	384	-	A10264;CDW43_RS01320phosphoribosyl-AMP cyclohydrolase;;	51	4764	4988	1709	101	87	175	85	6334	5196	942	6903	13041	8851	8730	7458	19313
CDS	286647	287420	774	-	A10265;CDW43_RS01325imidazole glycerol phosphate synthase subunit HisF;;	90	10795	12767	3824	198	153	256	166	14100	12012	2123	10798	20501	12751	13882	11821	27901
CDS	287426	288175	750	-	A10266;CDW43_RS013301-(5-phosphoribosyl)-5-[(5-phosphoribosylamino)methylideneamino]imidazole-4-carboxamide isomerase;;	206	14356	16138	5402	234	216	419	312	17409	15399	2927	14293	26861	15987	22329	16536	35372
CDS	288201	288836	636	-	A10267;CDW43_RS01335imidazole glycerol phosphate synthase subunit HisH;;	69	14482	14871	6281	151	162	240	171	18629	16509	2452	7865	13351	7967	7649	6116	16570
CDS	288884	289477	594	-	A10268;CDW43_RS01340imidazoleglycerol-phosphate dehydratase HisB;;	126	17268	15616	7800	636	656	727	555	25413	23424	3773	13732	22197	13852	12549	11116	28230
CDS	289575	290324	750	+	A10269;CDW43_RS01345fumarate/nitrate reduction transcriptional regulator Fnr;;	41	14454	11387	4550	242	379	278	166	8084	8217	1980	13362	17518	9454	4959	4488	15962
Pseudo	290579	290641	63	+	A10270;CDW43_RS16770hypothetical protein;partial;pseudo	0	1043	1239	435	19	31	26	16	647	702	88	637	817	443	447	413	1116
Pseudo	290752	291044	293	+	A10271;CDW43_RS16775OmpW family outer membrane protein;pseudo;	4	2531	2939	1195	34	46	64	49	1904	2125	193	2194	3756	2028	1958	1594	3978
CDS	291149	292693	1545	-	A10272;CDW43_RS01355murein biosynthesis integral membrane protein MurJ;;	54	7312	8279	3680	202	180	216	131	7568	7942	971	4791	7544	4470	3906	3008	7657
CDS	292746	293366	621	+	A10273;CDW43_RS01360hypothetical protein;;	3	4101	3740	1790	74	61	73	71	4625	4945	660	2105	2968	1666	1208	1082	2850
CDS	293363	294274	912	-	A10274;CDW43_RS01365hydrogen peroxide-inducible genes activator;;	7	6931	6395	2940	126	77	99	83	7111	7560	2285	6909	9617	4902	2726	2185	7038
CDS	294415	294579	165	+	A10275;CDW43_RS01370rubredoxin;;	0	1486	1469	588	62	64	82	53	1510	1934	325	2690	3646	1563	922	794	2370
CDS	294674	295750	1077	+	A10276;CDW43_RS01375DNA replication/repair protein RecF;;	2	5826	6606	2350	72	90	135	52	8136	9585	1137	7101	10585	5659	3731	3040	9796
CDS	295823	298237	2415	+	A10277;CDW43_RS01380DNA topoisomerase (ATP-hydrolyzing) subunit B;;	123	40755	34349	14669	575	519	930	656	26580	29087	4651	38719	53046	27528	14123	13181	43292
CDS	298638	299954	1317	-	A10278;CDW43_RS01385NAD(P)/FAD-dependent oxidoreductase;;	150	29215	23518	15697	1064	819	1629	1063	25947	26940	6327	27395	33769	15659	10698	9811	28397
CDS	300092	300652	561	+	A10279;CDW43_RS01390flavoprotein;;	24	12802	12190	3178	187	196	234	180	7368	8885	1728	8000	9477	4526	2973	2739	8142
CDS	300645	302072	1428	+	A10280;CDW43_RS01395DUF6513 domain-containing protein;;	79	26257	23235	10011	327	299	392	305	24317	26733	3128	16275	22767	12256	8312	6870	22456
CDS	302080	302670	591	+	A10281;CDW43_RS01400DUF447 family protein;;	41	4549	4277	1374	59	54	79	70	4908	4965	644	5818	9379	5534	2663	2449	10464
CDS	302660	303367	708	+	A10282;CDW43_RS01405(5-formylfuran-3-yl)methyl phosphate synthase;;	50	6843	6967	1800	78	27	69	68	6097	7125	936	4685	6925	4146	3005	2769	7743
CDS	303427	305706	2280	-	A10283;CDW43_RS014105-methyltetrahydropteroyltriglutamate--homocysteine S-methyltransferase;;	27	102796	65264	24037	47	52	90	59	64182	84925	42787	3640	4901	2794	1761	1562	4746
CDS	305807	306703	897	+	A10284;CDW43_RS01415LysR family transcriptional regulator;;	15	2530	3097	1167	30	32	42	41	1782	1964	507	2581	3736	2081	1231	1093	2969
CDS	306700	307503	804	-	A10285;CDW43_RS01420response regulator;;	29	5878	6355	2362	65	67	170	100	5135	5149	760	8884	12971	7489	3852	3359	10511
CDS	307516	308070	555	-	A10286;CDW43_RS01425DJ-1/PfpI family protein;;	66	10082	10083	3251	151	138	365	323	7139	7937	1534	17325	23507	11067	8044	6338	16638
CDS	308080	309411	1332	-	A10287;CDW43_RS01430S41 family peptidase;;	275	33194	31677	11910	740	765	1448	1057	22774	25236	5377	59298	76337	36571	17862	14953	48607
CDS	309436	310584	1149	-	A10288;CDW43_RS01435peptidoglycan DD-metalloendopeptidase family protein;;	112	18335	16723	6445	748	809	1052	776	12054	12861	2375	22322	25432	12201	6455	5176	16488
CDS	310593	312125	1533	-	A10289;CDW43_RS014402,3-bisphosphoglycerate-independent phosphoglycerate mutase;;	80	14191	14363	4649	405	328	653	511	12423	16596	2666	16527	21361	10066	7282	5983	13779
CDS	312284	312574	291	+	A10290;CDW43_RS01445metalloregulator ArsR/SmtB family transcription factor;;	16	8794	8492	3700	170	165	282	142	7986	8402	1527	5130	7217	3399	2283	1824	5882
CDS	312610	313029	420	+	A10291;CDW43_RS01450rhodanese-like domain-containing protein;;	31	8994	8672	3933	121	135	384	192	10640	10925	1873	9842	13688	6744	3964	3313	11626
CDS	313046	313303	258	+	A10292;CDW43_RS01455glutaredoxin 3;;	26	6280	5772	2477	85	66	224	106	8060	7746	1450	6643	9789	5202	2138	2170	8522
CDS	313325	313807	483	+	A10293;CDW43_RS01460protein-export chaperone SecB;;	118	12918	12562	4718	105	102	278	164	17622	18428	4160	19586	30958	17317	8570	8568	32241
CDS	313841	314851	1011	+	A10294;CDW43_RS01465NAD(P)H-dependent glycerol-3-phosphate dehydrogenase;;	133	18592	21303	6334	176	171	272	299	21291	23002	3736	18946	30278	15822	11762	10093	30962
CDS	314876	315751	876	+	A10295;CDW43_RS01470hypothetical protein;;	160	20882	18669	6806	340	323	491	477	25592	24607	4374	21054	33240	17463	10329	9471	31901
CDS	315805	316968	1164	-	A10296;CDW43_RS01475SAM-dependent methyltransferase;;	35	5252	4128	1222	113	97	110	128	4510	5113	809	3136	4887	2679	2103	1839	4673
CDS	316985	317704	720	+	A10297;CDW43_RS01480SDR family oxidoreductase;;	36	5236	3964	1143	155	168	261	166	3723	3993	898	5069	6675	3758	2645	2186	6242
CDS	317636	318163	528	-	A10298;CDW43_RS014852-amino-4-hydroxy-6-hydroxymethyldihydropteridine diphosphokinase;;	10	3584	2631	683	46	31	75	37	2905	2808	558	2894	4330	2682	1764	1521	4452
CDS	318160	318513	354	-	A10299;CDW43_RS01490dihydroneopterin aldolase;;	16	2913	2420	760	44	67	137	72	2591	2257	531	2020	3451	1821	1245	1041	3160
CDS	318590	319186	597	+	A10300;CDW43_RS01495glycerol-3-phosphate 1-O-acyltransferase PlsY;;	49	2297	2587	1116	151	94	171	130	3521	3395	481	2338	3630	2167	3890	3155	4375
CDS	319178	320194	1017	-	A10301;CDW43_RS01500tRNA (adenosine(37)-N6)-threonylcarbamoyltransferase complex transferase subunit TsaD;;	41	4691	4374	1585	91	70	150	92	6762	6119	1108	2980	4602	2689	4147	3383	5303
CDS	320347	320562	216	+	A10302;CDW43_RS0150530S ribosomal protein S21;;	380	71848	73602	30383	1289	1244	1905	658	60862	58207	5821	25993	45682	22836	21401	18760	49554
CDS	320586	321047	462	+	A10303;CDW43_RS01510GatB/YqeY domain-containing protein;;	217	135446	143650	57418	1351	1104	1820	711	110263	108153	9313	33326	62080	32597	30777	27653	64348
CDS	321116	322840	1725	+	A10304;CDW43_RS01515DNA primase;;	70	37131	43556	12929	566	609	614	285	36967	43029	4215	9824	15714	9428	9566	8066	19731
CDS	322936	324774	1839	+	A10305;CDW43_RS01520RNA polymerase sigma factor RpoD;;	624	200423	188303	59189	3157	2610	4308	2237	134110	196972	23351	87322	121101	65199	48430	42574	99641
CDS	324868	326013	1146	-	A10307;CDW43_RS01530site-specific integrase;;	326	72364	33914	2037	3455	2140	2437	1243	24257	37167	18033	109831	125416	57202	38748	30329	72197
CDS	326642	327340	699	+	A10308;CDW43_RS01545helix-turn-helix transcriptional regulator;;	6	1308	915	33	28	9	22	19	1057	1969	1893	2300	2435	1189	639	558	1453
CDS	327510	327875	366	+	A10309;CDW43_RS01550plasmid mobilization relaxosome protein MobC;;	16	891	485	43	34	35	29	36	689	990	427	2149	2617	1266	693	569	1664
CDS	327856	329661	1806	+	A10310;CDW43_RS01555relaxase/mobilization nuclease domain-containing protein;;	24	2551	1424	60	38	23	31	17	2695	3627	805	3486	4821	2420	1533	1354	3973
CDS	329676	330023	348	-	A10311;CDW43_RS01560hypothetical protein;;	4	1601	1255	301	17	32	32	4	1194	1504	309	1593	1954	1071	481	432	1967
CDS	330083	331171	1089	-	A10312;CDW43_RS01565AAA family ATPase;;	8	2825	4017	1453	57	66	79	68	2434	3474	985	2958	3712	2049	1218	1042	3531
CDS	331232	331741	510	-	A10313;CDW43_RS01570LAGLIDADG family homing endonuclease;;	0	593	478	38	12	28	8	20	787	1353	1321	913	1028	571	273	274	865
CDS	331820	332050	231	-	A10314;CDW43_RS01575helix-turn-helix transcriptional regulator;;	6	711	375	51	43	5	31	11	784	936	175	782	1086	546	367	357	1027
CDS	332272	332412	141	-	A10315;CDW43_RS16575hypothetical protein;;	5	491	323	22	13	6	8	12	495	521	123	693	1106	540	1010	759	1132
CDS	332532	333662	1131	-	A10316;CDW43_RS01585ABC transporter permease;;	160	3634	6083	129	417	145	316	136	1896	2263	821	5657	6040	2133	2833	2111	3131
CDS	333664	336426	2763	-	A10317;CDW43_RS01590ribosome-associated ATPase/putative transporter RbbA;;	62	3626	2753	62	82	60	146	57	1610	1986	419	1901	2532	1410	3685	2719	3039
CDS	336430	337509	1080	-	A10318;CDW43_RS01595efflux RND transporter periplasmic adaptor subunit;;	22	2058	1682	21	74	43	185	18	513	644	186	882	1272	617	1746	1314	1302
CDS	337524	339011	1488	-	A10319;CDW43_RS01600efflux transporter outer membrane subunit;;	53	7070	6162	97	295	141	652	56	1335	2133	3016	1565	2250	1220	3485	2938	2137
CDS	339490	340128	639	+	A10320;CDW43_RS01605TetR/AcrR family transcriptional regulator;;	26	3069	2384	78	67	33	107	33	1154	1156	1349	1799	2408	1455	1804	1583	2900
CDS	340161	341168	1008	+	A10321;CDW43_RS01610DUF4105 domain-containing protein;;	24	1872	974	32	43	23	71	26	783	877	360	2662	4453	2734	3003	2496	4997
CDS	341201	343114	1914	+	A10322;CDW43_RS01615alpha/beta fold hydrolase;;	47	3094	1951	62	96	34	52	35	1740	1721	532	3698	6428	3900	3831	3132	7764
Pseudo	343139	343516	378	-	A10323;CDW43_RS16580IS30 family transposase;partial;pseudo	0	578	304	16	4	4	3	4	482	411	82	458	896	646	499	341	1569
CDS	344220	344969	750	+	A10324;CDW43_RS01625hypothetical protein;;	0	1266	558	62	35	24	6	0	1522	1773	375	1564	1791	906	404	382	1370
CDS	345146	345994	849	-	A10325;CDW43_RS01630triose-phosphate isomerase;;	41	1569	1113	1245	39	44	29	47	1090	1376	754	1583	2134	1079	865	797	1839
CDS	346039	347043	1005	-	A10326;CDW43_RS01635class 1 fructose-bisphosphatase;;	42	3066	1076	10531	30	19	31	39	910	1071	1626	1215	1562	808	819	756	1345
CDS	347124	348194	1071	-	A10327;CDW43_RS01640fructose-bisphosphate aldolase class II;;	281	17705	5786	59352	272	155	150	127	4913	3208	12411	3079	4465	2419	3713	2918	4331
CDS	348701	349222	522	-	A10328;CDW43_RS01645ankyrin repeat domain-containing protein;;	0	2347	2354	633	18	64	64	42	1580	1621	522	2140	2773	1464	708	640	2407
CDS	349399	349572	174	+	A10329;CDW43_RS01650YqaE/Pmp3 family membrane protein;;	32	1908	1834	666	91	61	33	53	1089	1109	265	2332	3077	1529	730	594	2434
CDS	349668	349796	129	-	A10330;CDW43_RS01655entericidin A/B family lipoprotein;;	5	1787	2007	766	77	58	62	56	903	989	249	2182	2552	1194	522	525	1884
CDS	350254	350613	360	+	A10331;CDW43_RS01660iron dicitrate transport regulator FecR;;	16	2142	2851	795	77	92	100	37	1398	1794	378	1601	1937	1021	732	564	1563
CDS	350712	351005	294	+	A10332;CDW43_RS16585hypothetical protein;;	11	852	1378	318	15	20	28	33	682	826	137	875	1314	636	363	301	847
Pseudo	351024	351281	258	+	A10333;CDW43_RS16590OmpA family protein;partial;pseudo	0	1365	1504	437	95	87	81	30	1036	1148	335	1145	1417	598	393	332	1059
CDS	351297	352643	1347	+	A10334;CDW43_RS01670TolC family outer membrane protein;;	95	6373	6551	2176	605	656	559	357	4370	5089	1602	9225	12035	5769	3601	2918	7486
CDS	352781	353056	276	-	A10335;CDW43_RS16595molybdopterin dinucleotide binding domain-containing protein;;	6	1981	2280	649	22	22	55	26	1389	1723	400	1257	1525	959	587	443	1062
CDS	353075	353443	369	-	A10336;CDW43_RS16600hypothetical protein;;	4	2118	2410	833	34	18	32	41	1404	1581	324	1086	1528	886	768	445	1367
CDS	353469	353891	423	-	A10337;CDW43_RS16605molybdopterin-dependent oxidoreductase;;	13	1170	1528	535	28	20	62	22	653	769	155	610	943	460	344	290	711
CDS	354007	354324	318	-	A10338;CDW43_RS16610molybdopterin-dependent oxidoreductase;;	4	680	1194	450	24	44	61	62	207	308	58	464	616	256	171	152	395
CDS	354391	354804	414	-	A10339;CDW43_RS16615molybdopterin-dependent oxidoreductase;;	2	1069	2195	711	37	20	40	53	514	633	153	643	763	328	315	287	525
CDS	355174	355668	495	+	A10340;CDW43_RS01680thiol peroxidase;;	95	9327	11662	4133	205	232	303	565	3701	4152	2214	11982	15200	7695	3267	3041	12504
CDS	355836	356483	648	+	A10341;CDW43_RS01685hypothetical protein;;	54	13186	20014	3795	446	640	584	317	5711	6923	1936	13582	17384	8624	5170	4332	13044
CDS	356623	357087	465	+	A10342;CDW43_RS01690(2Fe-2S)-binding protein;;	24	2790	1933	560	46	37	152	269	3121	3428	980	5325	7658	4133	2038	1778	6629
CDS	357084	359402	2319	+	A10343;CDW43_RS01695xanthine dehydrogenase family protein molybdopterin-binding subunit;;	109	11161	8843	2697	267	294	409	980	15539	15502	3424	19526	29154	15058	9256	8025	26192
CDS	359405	360400	996	+	A10344;CDW43_RS01700XdhC family protein;;	60	4313	4309	1390	115	115	156	328	5176	5021	879	5483	8190	4032	3208	2511	7253
CDS	360413	361027	615	+	A10345;CDW43_RS01705nucleotidyltransferase family protein;;	12	1820	1794	877	57	55	46	114	2460	2232	271	2096	3168	1934	1235	1008	3619
CDS	361024	361755	732	-	A10346;CDW43_RS01710Crp/Fnr family transcriptional regulator;;	4	3044	2701	2743	69	101	144	130	4286	4517	465	1776	2653	1855	1264	1151	3554
CDS	362034	362198	165	-	A10347;CDW43_RS01715DUF1328 domain-containing protein;;	165	8278	7376	3775	444	591	505	739	838	751	237	4869	5240	1824	515	473	1438
CDS	362391	362576	186	+	A10348;CDW43_RS01720hypothetical protein;;	73	15384	14815	6392	407	382	329	653	4594	5231	1862	10540	10337	4005	1353	1129	5566
CDS	362658	362930	273	+	A10349;CDW43_RS01725DUF883 family protein;;	238	33855	33891	14860	974	974	1031	1285	7980	9683	3431	25199	24703	8805	3634	3166	11889
CDS	362970	363404	435	+	A10350;CDW43_RS01730phage holin family protein;;	725	39052	36358	13720	1289	1287	1638	2139	7923	9245	2625	43289	45980	19855	10559	8209	23357
CDS	363481	363837	357	+	A10351;CDW43_RS01735hypothetical protein;;	151	32499	31772	10594	868	996	933	1620	5842	7076	1664	18524	20190	8344	4717	3674	12648
CDS	363880	364071	192	+	A10352;CDW43_RS01740YjfB family protein;;	132	22180	21953	6749	1027	1161	1064	1686	5610	5264	1763	13684	15183	7349	4502	3418	9677
CDS	364196	365584	1389	+	A10353;CDW43_RS01745sodium:solute symporter family protein;;	164	12772	9286	3895	414	453	693	531	5530	5360	1733	13982	18980	10077	6100	5050	16316
CDS	365610	365870	261	+	A10354;CDW43_RS01750hypothetical protein;;	79	4130	3313	1695	171	184	250	200	1342	1456	560	7932	9983	4932	2213	1824	6085
CDS	365903	366223	321	+	A10355;CDW43_RS01755hypothetical protein;;	128	3979	4122	1279	143	148	173	164	2800	2976	890	6881	8994	5011	2505	2054	5595
CDS	366294	367589	1296	+	A10356;CDW43_RS01760TolC family protein;;	220	3293	5936	715	43	35	67	60	6799	6660	1497	1875	3183	1865	1948	1912	3060
CDS	367594	368820	1227	+	A10357;CDW43_RS01765efflux RND transporter periplasmic adaptor subunit;;	92	1736	2778	327	26	30	54	56	4369	4048	914	1780	3081	1925	1833	1609	3576
CDS	368830	371952	3123	+	A10358;CDW43_RS01770CusA/CzcA family heavy metal efflux RND transporter;;	295	6233	9106	1421	153	181	178	250	9301	9569	1597	8498	12788	6721	8521	6543	12057
CDS	372030	372407	378	-	A10359;CDW43_RS01775DUF4168 domain-containing protein;;	7	3427	1690	470	49	67	64	87	702	928	126	395	565	313	413	302	501
CDS	372613	374073	1461	+	A10360;CDW43_RS01780HAMP domain-containing sensor histidine kinase;;	13	3482	4145	942	62	43	56	49	1589	1660	752	3631	5276	2583	1513	1297	3970
CDS	374070	375497	1428	+	A10361;CDW43_RS01785sigma-54 dependent transcriptional regulator;;	9	4161	5531	1329	108	98	102	83	2419	2793	571	4041	5461	2894	2280	1858	4220
CDS	375494	376627	1134	-	A10362;CDW43_RS01790WG repeat-containing protein;;	10	2450	2412	988	70	130	126	100	1330	1478	389	2340	2821	1659	1099	881	2524
CDS	376976	377047	72	-	A10363;CDW43_RS16780pyrroloquinoline quinone precursor peptide PqqA;;	7	293	249	185	11	29	18	16	162	148	52	443	567	375	240	151	442
CDS	377159	378514	1356	-	A10364;CDW43_RS01800glutathione-disulfide reductase;;	103	6451	7118	8234	130	125	232	243	4373	2977	1852	5082	8557	5368	5536	4839	14056
CDS	378602	379126	525	-	A10365;CDW43_RS01805peroxiredoxin;;	186	10711	12686	20966	112	169	151	465	6969	5012	8063	4542	8474	5225	5789	5317	15404
CDS	379249	381054	1806	-	A10366;CDW43_RS01810EAL domain-containing protein;;	128	12441	15397	7341	365	348	428	447	5933	6483	1328	11200	16376	9512	5675	4715	16572
CDS	380984	381448	465	-	A10367;CDW43_RS16620response regulator;;	49	7664	7137	2602	166	112	218	112	3615	3655	1115	8099	11061	6146	3980	3250	9963
CDS	381460	384423	2964	-	A10368;CDW43_RS01815PAS domain S-box protein;;	112	17942	15518	6901	334	365	435	364	10532	10288	2591	13632	18590	10472	5598	4671	17890
CDS	384574	385134	561	-	A10369;CDW43_RS018205-formyltetrahydrofolate cyclo-ligase;;	6	6310	6035	2156	162	185	220	162	3843	4089	872	5288	6983	3946	1650	1575	5265
CDS	385131	385517	387	-	A10370;CDW43_RS01825Rrf2 family transcriptional regulator;;	10	6500	4397	1951	179	182	361	216	2275	2657	467	5963	8963	4247	1706	1655	6063
CDS	385942	386889	948	+	A10371;CDW43_RS01835FAD-binding oxidoreductase;;	42	8994	11456	2965	218	230	172	218	6313	7125	1302	4758	6886	3951	2573	2032	6178
CDS	387074	387391	318	+	A10372;CDW43_RS01840PepSY domain-containing protein;;	13	4464	7092	1872	66	94	91	64	3475	5838	2995	2004	3035	1277	2014	1243	1953
CDS	387701	389026	1326	-	A10373;CDW43_RS01845ATP-binding protein;;	20	8672	10608	3798	131	115	174	155	5438	6162	1482	5409	8037	4647	2760	2491	7187
CDS	389023	389685	663	-	A10374;CDW43_RS01850response regulator transcription factor;;	20	8728	11538	3219	132	119	129	122	4548	5882	1798	5597	7142	3189	3088	2451	5097
CDS	389688	390008	321	-	A10375;CDW43_RS01855PepSY domain-containing protein;;	0	5103	6602	1626	103	95	88	72	2469	3049	963	3295	4137	1943	1130	1050	2719
CDS	390445	391626	1182	+	A10376;CDW43_RS01860cyclopropane fatty acyl phospholipid synthase;;	38	6507	6645	1837	263	226	231	300	2492	3428	1792	14644	15844	7027	3619	3157	8161
CDS	391766	393223	1458	+	A10377;CDW43_RS01865catalase;;	232	40272	74793	18447	1535	1118	1437	1061	17419	28344	14600	53366	69726	32791	18003	15410	54071
CDS	393289	393759	471	+	A10378;CDW43_RS01870Dps family protein;;	316	69552	95541	21707	2092	1479	2430	2204	16363	35787	14302	74551	91822	36880	21591	16837	53022
CDS	394171	395622	1452	-	A10379;CDW43_RS01875aldehyde dehydrogenase family protein;;	168	14207	16901	5300	238	208	364	331	6995	7022	2451	17832	27490	15270	8632	7744	25105
CDS	395632	397272	1641	-	A10380;CDW43_RS01880acetolactate synthase large subunit;;	137	15944	14549	5772	302	352	396	368	6182	6463	2300	18458	25607	14259	7287	6266	24400
CDS	397359	398240	882	-	A10381;CDW43_RS01885OmpA family protein;;	18	4100	3406	934	67	110	82	64	1768	1755	414	3936	5923	3165	1352	1169	5785
CDS	398415	401369	2955	+	A10382;CDW43_RS01890EAL domain-containing protein;;	44	10241	10178	3645	181	206	246	178	6070	6295	1520	10225	15319	8231	4468	3743	14011
CDS	401800	403110	1311	+	A10383;CDW43_RS01895sodium-dependent transporter;;	12	6509	7164	2386	200	140	221	169	3777	3872	963	5415	7277	3808	2390	2016	6487
CDS	403240	405357	2118	+	A10384;CDW43_RS01900VTT domain-containing protein;;	46	6018	6956	1940	118	125	143	214	3139	2610	878	9119	12404	6291	3583	2763	9130
CDS	405327	406061	735	+	A10385;CDW43_RS01905endonuclease/exonuclease/phosphatase family protein;;	4	1594	1766	501	37	46	34	41	997	884	177	2264	3139	1690	1107	864	2542
CDS	406299	409253	2955	+	A10386;CDW43_RS01910DUF748 domain-containing protein;;	159	11571	11493	4080	317	239	416	377	6519	6472	1621	17590	24570	14098	7782	6758	24313
CDS	409363	409632	270	+	A10387;CDW43_RS01915hypothetical protein;;	7	1282	1238	541	11	36	44	25	718	743	82	1584	2278	1291	724	621	2696
CDS	410167	410940	774	-	A10388;CDW43_RS01925CbbQ/NirQ/NorQ/GpvN family protein;;	45	12906	12409	1942	99	106	76	129	9010	9196	1652	8511	12183	7538	2327	2046	12400
CDS	410959	412830	1872	-	A10389;CDW43_RS01930VWA domain-containing protein;;	81	29500	32478	4642	360	413	518	537	25498	26163	4965	16142	22096	13446	5641	4686	20596
CDS	412851	414263	1413	-	A10390;CDW43_RS01935cbb3-type cytochrome c oxidase subunit I;;	248	88550	105476	6954	713	1052	793	2052	61668	75199	33567	32370	45336	25607	11994	9703	40327
CDS	414280	414729	450	-	A10391;CDW43_RS01940cytochrome c;;	37	40674	40989	3380	376	441	635	930	21683	28107	23089	10242	12018	6218	2485	2101	9455
CDS	415014	416570	1557	+	A10392;CDW43_RS01945nitric oxide reductase transcriptional regulator NorR;;	42	21313	21084	1765	238	300	295	650	14552	26934	8008	9290	12438	6278	4117	3452	8218
CDS	416599	417174	576	+	A10393;CDW43_RS01950cytochrome c oxidase subunit 3;;	21	9527	9327	1605	71	58	71	139	10345	14406	4124	2918	4318	2339	1551	1318	4368
CDS	417542	418762	1221	-	A10394;CDW43_RS01960NnrS family protein;;	194	24672	28036	8132	382	423	391	493	24093	25805	4509	14495	21096	11804	7137	5907	18211
CDS	419256	420263	1008	-	A10395;CDW43_RS01965GTP 3',8-cyclase MoaA;;	56	20974	24128	8788	256	189	527	483	9884	12926	1596	7180	8977	4447	3904	3120	6124
CDS	420377	420766	390	-	A10396;CDW43_RS01970putative zinc-binding protein;;	14	10005	11851	4239	168	156	253	267	3471	4730	716	3272	3861	1659	1355	1154	2193
CDS	421560	423482	1923	+	A10397;CDW43_RS01975type IV pili methyl-accepting chemotaxis transducer N-terminal domain-containing protein;;	143	33295	31429	13661	738	782	1037	817	20227	23413	4177	34964	45176	24546	11747	9999	34712
CDS	423479	424141	663	+	A10398;CDW43_RS01980response regulator transcription factor;;	30	8070	7925	3423	84	88	134	120	5797	7026	816	7035	10879	6279	3815	3324	10149
CDS	424291	424413	123	-	A10399;CDW43_RS16785hypothetical protein;;	9	1191	978	256	18	10	10	13	727	887	101	1640	2288	1324	927	763	2208
CDS	424803	426068	1266	+	A10400;CDW43_RS01985nitrate/nitrite transporter;;	176	24643	4420	15433	866	793	766	1490	43779	68371	1146	1770	3759	3573	8288	5027	1450
CDS	426081	427691	1611	+	A10401;CDW43_RS01990MFS transporter;;	347	36771	6846	31431	1555	1056	652	2636	49975	48181	1589	5220	13044	13081	14873	9587	3760
CDS	427732	431487	3756	+	A10402;CDW43_RS01995nitrate reductase subunit alpha;;	912	146783	25206	130526	3804	2223	915	5675	209113	175601	10563	20314	51509	52029	35102	25946	16074
CDS	431519	433063	1545	+	A10403;CDW43_RS02000nitrate reductase subunit beta;;	399	62610	11378	65324	2267	1487	513	2684	81919	54530	4839	10395	26862	26376	12926	10924	8532
CDS	433073	433606	534	+	A10404;CDW43_RS02005nitrate reductase molybdenum cofactor assembly chaperone;;	198	31527	6857	31570	654	453	170	884	48430	28041	2994	4219	9919	9257	4582	3814	3556
CDS	433606	434301	696	+	A10405;CDW43_RS02010respiratory nitrate reductase subunit gamma;;	257	36574	8500	41352	1309	940	286	1352	49242	25715	3772	6548	14686	12745	8188	5702	5565
CDS	434318	435004	687	+	A10406;CDW43_RS02015carbonic anhydrase;;	201	30773	7517	29210	892	741	197	966	39166	18843	2656	4779	10653	8967	4748	4083	4117
CDS	435073	436332	1260	+	A10407;CDW43_RS02020hypothetical protein;;	122	33143	15252	31781	825	652	337	971	34172	18243	1978	8306	14309	10069	5743	4346	6633
CDS	437232	437510	279	+	A10408;CDW43_RS02030pyrroloquinoline quinone biosynthesis peptide chaperone PqqD;;	13	11008	7493	4965	95	133	160	460	9311	7146	1317	2965	5649	5164	6679	5996	11247
CDS	437479	438639	1161	+	A10409;CDW43_RS02035pyrroloquinoline quinone biosynthesis protein PqqE;;	15	23404	18348	9138	130	237	368	915	22567	15093	2791	5999	10878	9613	11862	10641	21389
CDS	438758	439252	495	+	A10410;CDW43_RS02040urate hydroxylase PuuD;;	26	5073	4043	2016	37	60	89	112	5682	3876	723	2588	4950	4149	4327	3596	8278
CDS	439269	440369	1101	+	A10411;CDW43_RS020453-phosphoserine/phosphohydroxythreonine transaminase;;	21	9063	8868	3234	96	78	120	172	11001	8111	1192	5078	8294	6216	5861	4825	12396
CDS	440385	441257	873	+	A10412;CDW43_RS02050hypothetical protein;;	14	6700	8195	2076	102	147	108	85	5978	5036	771	4504	6543	4224	3633	2988	8982
CDS	441370	442131	762	+	A10413;CDW43_RS02055IS5 family transposase;;	21	6377	8206	1964	90	65	123	99	6270	6149	860	4413	6123	3423	3466	2564	6231
CDS	442393	444555	2163	+	A10414;CDW43_RS02060NosR/NirI family protein;;	138	40692	36907	15515	819	591	949	776	39119	41812	6313	25136	33061	18625	13282	10527	32046
CDS	444598	446514	1917	+	A10415;CDW43_RS02065TAT-dependent nitrous-oxide reductase;;	249	76474	67830	19460	880	871	897	1450	63615	66843	13547	72254	100383	52132	31860	28528	92934
CDS	446707	447885	1179	+	A10416;CDW43_RS02070nitrous oxide reductase family maturation protein NosD;;	36	18199	18978	5410	173	160	208	226	14094	14208	1453	12810	19403	11163	6818	6048	22495
CDS	447882	448781	900	+	A10417;CDW43_RS02075ABC transporter ATP-binding protein;;	32	9027	11048	2723	88	108	96	148	7389	7109	747	5929	9559	5839	3931	3390	10059
CDS	448781	449611	831	+	A10418;CDW43_RS02080ABC transporter permease subunit;;	93	10164	10572	3093	190	161	237	249	7900	6828	918	9769	15224	9319	6009	5060	16386
CDS	449608	450120	513	+	A10419;CDW43_RS02085nitrous oxide reductase accessory protein NosL;;	30	6864	7793	1786	95	65	104	127	5521	4921	676	5313	8342	5180	2808	2570	9714
CDS	450934	452982	2049	+	A10420;CDW43_RS02090ribonucleoside triphosphate reductase;;	405	116082	73755	9172	1844	1422	3988	1410	17621	18700	10650	5641	8309	5234	25495	16187	10030
CDS	453008	453178	171	+	A10421;CDW43_RS16790anaerobic ribonucleoside-triphosphate reductase;;	157	77243	46545	4937	707	640	892	575	7849	8223	5304	3967	5186	2839	10790	6739	4829
CDS	453200	453880	681	+	A10422;CDW43_RS02100anaerobic ribonucleoside-triphosphate reductase activating protein;;	170	94389	68554	6587	792	719	1024	876	11697	11855	5529	5577	7786	4417	14137	9405	8342
CDS	454030	454917	888	+	A10423;CDW43_RS02105pyridoxal 5'-phosphate synthase lyase subunit PdxS;;	142	40828	37174	9047	545	460	1055	722	15038	12913	3574	9719	13829	7463	10015	7921	13731
CDS	454918	455484	567	+	A10424;CDW43_RS02110pyridoxal 5'-phosphate synthase glutaminase subunit PdxT;;	87	24527	30440	5597	259	150	442	426	14800	14535	2834	8714	13425	7896	8634	7255	13910
CDS	455509	456039	531	+	A10425;CDW43_RS02115molybdopterin adenylyltransferase;;	74	19881	17938	5778	320	253	431	467	9353	8394	2075	5939	9311	5491	6439	5207	9375
CDS	456061	456684	624	-	A10426;CDW43_RS02120SCP2 sterol-binding domain-containing protein;;	34	16893	11730	5173	378	309	373	558	8076	8302	1344	2264	3162	1930	4513	3568	3822
CDS	456735	457730	996	+	A10427;CDW43_RS02125peptidase U32 family protein;;	32	12010	8582	2557	317	213	302	246	7799	8274	1310	2983	4097	2194	4606	3722	4691
CDS	457768	458673	906	+	A10428;CDW43_RS02130U32 family peptidase;;	41	12560	8566	2340	156	149	180	241	10613	9152	1259	3821	5831	3455	4581	3821	7051
CDS	458791	459204	414	-	A10429;CDW43_RS02135cytochrome c;;	10	5200	2837	1747	115	114	100	135	3492	3263	565	1261	1771	1010	1587	1505	2121
CDS	459790	460521	732	+	A10430;CDW43_RS02145hypothetical protein;;	28	8999	8652	3829	176	156	203	180	7050	6736	1149	5437	7264	4181	1923	1775	7387
CDS	460527	460970	444	-	A10431;CDW43_RS02150copper resistance protein CopD;;	23	6206	6111	2405	112	84	137	111	4654	4309	775	5747	8101	4843	2271	1873	6997
CDS	461002	463653	2652	-	A10432;CDW43_RS16795NarK family nitrate/nitrite MFS transporter;;	298	28928	30587	10368	755	721	725	927	14288	14204	2948	30531	43629	25230	11041	8482	30830
CDS	463672	464430	759	-	A10433;CDW43_RS02160peptidylprolyl isomerase;;	67	9553	10154	3290	111	105	56	325	2840	3032	702	15811	17624	8252	2824	2257	8590
CDS	464448	465137	690	-	A10434;CDW43_RS02165respiratory nitrate reductase subunit gamma;;	44	8699	8654	2957	59	57	73	221	2487	2460	787	6380	8003	3641	1203	1063	4329
CDS	465173	465871	699	-	A10435;CDW43_RS02170nitrate reductase molybdenum cofactor assembly chaperone;;	58	14176	14501	4262	177	100	83	437	3853	4007	645	22636	29932	14290	3227	2723	14374
CDS	465874	467412	1539	-	A10436;CDW43_RS02175nitrate reductase subunit beta;;	212	25303	24296	8093	343	336	202	1344	7711	7712	1693	81319	105391	52376	8371	7289	53251
CDS	467409	471152	3744	-	A10437;CDW43_RS02180nitrate reductase subunit alpha;;	834	83232	76781	25863	2366	3001	2416	4089	24512	26689	8249	178252	215721	109046	28163	23566	103389
CDS	471507	473555	2049	-	A10438;CDW43_RS02185hypothetical protein;;	103	12632	16089	4533	192	147	168	225	7174	7250	1377	10883	17876	10080	4130	3489	16222
CDS	473588	474406	819	-	A10439;CDW43_RS02190CbbQ/NirQ/NorQ/GpvN family protein;;	223	14999	22591	4611	151	158	210	487	5318	5440	832	14576	22410	12165	5073	3994	16772
CDS	474403	475764	1362	-	A10440;CDW43_RS02195cbb3-type cytochrome c oxidase subunit I;;	471	27806	37000	8745	364	342	478	1092	7224	8180	1830	22602	29653	15235	5991	4515	18671
CDS	475825	476655	831	-	A10441;CDW43_RS02200cytochrome c;;	237	21771	31981	7424	328	271	286	772	4682	6944	3103	14766	18293	8941	3581	3035	11072
CDS	477670	478095	426	-	A10443;CDW43_RS02210hypothetical protein;;	26	3461	4112	1352	27	49	52	29	4293	3461	589	2592	3759	1893	1420	1402	3390
CDS	478323	478631	309	-	A10444;CDW43_RS02215HIRAN domain-containing protein;;	4	2624	2801	897	108	83	136	56	2758	2377	302	2614	2971	1539	843	653	2677
CDS	479646	481019	1374	-	A10446;CDW43_RS02225oxygen-independent coproporphyrinogen III oxidase;;	74	18232	16337	7603	472	541	868	667	12618	13807	3073	23595	24751	12189	6368	5611	16011
CDS	481100	481771	672	-	A10447;CDW43_RS02230TIGR00730 family Rossman fold protein;;	31	2968	3062	1102	111	124	153	88	2051	2151	586	4758	5217	2819	1547	1300	3976
CDS	481949	483241	1293	+	A10448;CDW43_RS02235phosphoribosylamine--glycine ligase;;	71	6136	4889	2756	310	265	745	902	10511	7514	1220	6284	10525	6078	8857	7429	13660
CDS	483270	484142	873	+	A10449;CDW43_RS02240phosphoribulokinase;;	64	6427	5738	2438	162	173	274	261	6585	4483	1417	9569	12680	6606	5579	4688	11146
CDS	484176	484730	555	+	A10450;CDW43_RS02245Sua5/YciO/YrdC/YwlC family protein;;	48	1879	1774	696	67	46	84	108	1868	1486	408	4250	5685	3255	3503	2719	5800
CDS	484727	485653	927	+	A10451;CDW43_RS02250oxygen-dependent coproporphyrinogen oxidase;;	62	3812	3516	1314	81	49	119	167	3743	2529	510	5182	8380	4772	5786	4306	9238
CDS	485896	486984	1089	-	A10452;CDW43_RS02255peptide chain release factor 1;;	59	7626	7650	2841	65	48	146	91	8164	6659	976	3788	6523	3871	4421	3324	7910
CDS	486988	488247	1260	-	A10453;CDW43_RS02260glutamyl-tRNA reductase;;	66	18975	17808	6944	418	474	726	488	12045	13234	1916	9501	14204	7800	6060	4964	12117
CDS	488370	490145	1776	+	A10454;CDW43_RS02265tetratricopeptide repeat protein;;	240	17533	19889	9693	541	367	897	732	11290	12924	2626	20318	25626	12693	7310	5651	19233
CDS	490142	490741	600	+	A10455;CDW43_RS02270lipoprotein insertase outer membrane protein LolB;;	88	5338	5995	2070	42	72	267	159	4507	5387	859	9296	13110	7309	4522	3402	12308
CDS	490738	491607	870	+	A10456;CDW43_RS022754-(cytidine 5'-diphospho)-2-C-methyl-D-erythritol kinase;;	697	76185	55003	28674	3439	2542	5792	3900	63447	52404	5645	25509	48319	30357	73436	51351	66889
CDS	491791	492726	936	+	A10458;CDW43_RS02285ribose-phosphate diphosphokinase;;	236	56968	55964	28536	682	573	1262	757	68152	55566	7701	13048	24594	16491	22681	20444	41775
CDS	492840	493514	675	+	A10459;CDW43_RS0229050S ribosomal protein L25/general stress protein Ctc;;	265	36996	36324	12960	290	315	570	831	65925	39229	10125	12287	25183	17478	22881	22720	53645
CDS	493535	494107	573	+	A10460;CDW43_RS02295aminoacyl-tRNA hydrolase;;	54	10008	9759	3669	67	116	136	130	19445	11193	2199	2119	4446	3240	4665	4523	9844
CDS	494209	495300	1092	+	A10461;CDW43_RS02300redox-regulated ATPase YchF;;	79	14481	15251	5300	264	350	426	311	16680	11840	2665	7054	10084	4996	6300	5353	11601
CDS	495358	496425	1068	+	A10462;CDW43_RS02305phospholipase A;;	105	16578	17694	7222	227	340	564	476	11119	8787	2307	9524	12551	6272	4322	3359	10760
CDS	496731	497843	1113	-	A10464;CDW43_RS02315mechanosensitive ion channel family protein;;	49	7830	9094	5791	126	176	221	160	8931	9096	1003	1780	2510	1642	1808	1440	2754
Pseudo	498130	498892	763	-	A10465;CDW43_RS02320IS5 family transposase;pseudo;	13	1227	1755	560	37	32	43	41	727	777	333	880	1272	644	725	597	1169
CDS	499135	499443	309	+	A10466;CDW43_RS02325hypothetical protein;;	25	4201	3149	3696	60	91	87	88	573	563	371	3071	4650	3031	1536	1268	5764
CDS	499519	499944	426	+	A10467;CDW43_RS02330hypothetical protein;;	28	7130	4296	3642	123	103	142	156	1408	2173	466	5281	8146	5057	2543	2199	9635
CDS	499941	500678	738	-	A10468;CDW43_RS02335hypothetical protein;;	50	20117	12564	8723	1199	1213	819	638	4608	6308	1238	8893	10207	5481	3031	2524	9045
CDS	500757	501740	984	-	A10469;CDW43_RS02340hypothetical protein;;	18	7225	6243	3766	178	236	274	209	5510	5617	1203	4585	5628	2942	1678	1402	4705
CDS	501926	502327	402	+	A10470;CDW43_RS02345large-conductance mechanosensitive channel protein MscL;;	28	1818	1360	1084	125	167	154	122	767	812	231	2837	3086	1386	1006	934	2237
CDS	502382	502996	615	+	A10471;CDW43_RS02350hypothetical protein;;	1	2318	2045	1263	64	72	83	59	1231	1294	394	2170	2903	1705	1357	1067	2715
CDS	502974	503924	951	-	A10472;CDW43_RS02355LysR family transcriptional regulator;;	19	2128	2373	1250	42	34	39	54	1255	1333	808	1934	2871	1632	1120	1068	2752
CDS	504170	505588	1419	+	A10473;CDW43_RS02360form I ribulose bisphosphate carboxylase large subunit;;	450	30556	10551	130671	727	214	287	370	12075	5579	19175	6266	9184	4827	6288	5187	8578
CDS	505658	506014	357	+	A10474;CDW43_RS02365ribulose bisphosphate carboxylase small subunit;;	80	4292	1554	17332	74	42	66	106	870	698	3011	2266	3357	1796	1321	1280	3107
CDS	506107	506919	813	+	A10475;CDW43_RS02370CbbQ/NirQ/NorQ C-terminal domain-containing protein;;	100	3529	1968	10917	53	40	53	96	1048	1041	2460	2192	3265	1876	1243	1034	2961
CDS	506959	509301	2343	+	A10476;CDW43_RS02375VWA domain-containing protein;;	123	4811	5912	6462	131	145	158	185	2521	2980	2198	4316	5939	3150	2767	2414	5185
CDS	509577	509888	312	+	A10477;CDW43_RS02380hypothetical protein;;	7	676	1315	514	5	4	8	12	388	369	188	454	595	322	241	234	594
CDS	510002	512224	2223	-	A10478;CDW43_RS16635EAL domain-containing protein;;	38	5484	6072	2335	186	173	196	120	4517	5068	958	2981	4422	2622	2229	1957	5670
CDS	512187	514238	2052	-	A10479;CDW43_RS16640ABC transporter substrate-binding protein;;	47	8268	6414	3010	174	212	223	139	10861	9028	998	3984	6675	4439	3650	3436	10964
CDS	514337	515350	1014	-	A10480;CDW43_RS02390VWA domain-containing protein;;	270	11440	14660	5461	47	58	50	66	16401	5971	624	13549	28441	21602	14691	12077	44393
CDS	515362	515934	573	-	A10481;CDW43_RS02395MxaK protein;;	213	5325	6491	2543	41	28	37	41	7595	2909	409	9490	20014	14124	9455	7944	29741
CDS	515931	516908	978	-	A10482;CDW43_RS02400vWA domain-containing protein;;	183	15980	20330	6654	67	58	55	55	16127	6704	921	10928	21148	14259	9116	7765	30730
CDS	516905	517870	966	-	A10483;CDW43_RS02405hypothetical protein;;	262	18206	20325	8324	80	125	112	105	16073	6815	1223	15463	30834	21313	10695	8955	44956
CDS	517860	518693	834	-	A10484;CDW43_RS02410hypothetical protein;;	121	27415	32634	12138	101	90	80	114	18548	8590	1614	26641	50550	36120	12408	12565	65743
CDS	518690	519724	1035	-	A10485;CDW43_RS02415MoxR family ATPase;;	469	74217	79421	30221	103	112	113	276	33302	17174	3516	75339	128401	79430	23294	23332	150025
CDS	519808	520083	276	-	A10486;CDW43_RS02420methanol dehydrogenase [cytochrome c] subunit;;	1103	496119	200049	258638	2099	2274	779	3044	85035	70302	24443	215548	343989	164112	97528	84027	322869
CDS	520215	520799	585	-	A10487;CDW43_RS02425cytochrome c(L), periplasmic;;	517	101921	91510	59554	258	289	161	1053	70940	48476	8457	100678	172739	94925	36841	37999	222337
CDS	520847	521644	798	-	A10488;CDW43_RS02430methanol oxidation system protein MoxJ;;	1114	178040	160190	90344	477	522	267	1751	100810	67746	14255	227968	355717	208165	66921	65590	436068
CDS	521821	523707	1887	-	A10489;CDW43_RS02435methanol/ethanol family PQQ-dependent dehydrogenase;;	25800	1436966	1276309	743955	17318	15387	13842	21235	512051	450380	161352	1587346	2428479	1305511	729161	645973	2559311
CDS	523912	524565	654	-	A10490;CDW43_RS02440response regulator transcription factor;;	93	39969	33063	16111	130	98	124	188	24980	25088	2456	29048	50693	31834	11416	11427	59717
CDS	524612	525583	972	-	A10491;CDW43_RS02445sensor histidine kinase;;	67	53410	44985	22745	182	143	99	264	18186	23343	2613	27374	37900	20495	9567	8090	32840
CDS	525806	526138	333	+	A10492;CDW43_RS02450hypothetical protein;;	31	13184	10627	8428	57	103	47	284	11649	8985	3496	5495	10922	5848	3923	4480	15980
CDS	526177	526692	516	+	A10493;CDW43_RS02455SRPBCC family protein;;	274	39048	31793	23934	227	255	158	832	34817	26269	12045	17400	31221	19789	19720	18995	49495
CDS	526699	527634	936	+	A10494;CDW43_RS02460YncE family protein;;	261	45282	36208	22754	195	211	134	728	41411	26919	8737	28438	55544	38564	26640	25610	86931
CDS	527667	528131	465	-	A10495;CDW43_RS02465tRNA (uridine(34)/cytosine(34)/5-carboxymethylaminomethyluridine(34)-2'-O)-methyltransferase TrmL;;	110	15735	12573	6129	138	142	169	259	11258	7669	1622	8235	15335	10577	8243	6920	21068
CDS	528134	529741	1608	-	A10496;CDW43_RS02470LysM peptidoglycan-binding domain-containing protein;;	190	27080	24779	12720	468	486	526	503	21217	18659	3198	15782	25677	15905	11785	10117	30080
CDS	530050	530853	804	+	A10497;CDW43_RS02475DUF2797 domain-containing protein;;	28	8175	8722	2358	205	230	319	197	5994	7914	1654	5694	6642	3173	2811	2037	5779
CDS	530853	531878	1026	+	A10498;CDW43_RS02480quinone-dependent dihydroorotate dehydrogenase;;	49	4905	5583	1677	264	141	259	239	3967	5367	1024	7637	10514	5832	4353	3635	9193
CDS	531880	532719	840	+	A10499;CDW43_RS02485mechanosensitive ion channel;;	101	7439	7913	2620	256	161	318	388	5155	5656	1406	9930	14470	8454	6423	5592	13459
CDS	532732	533502	771	-	A10500;CDW43_RS02490hydroxyacylglutathione hydrolase;;	58	7380	7819	2419	304	308	479	346	4512	4962	941	8909	10752	5523	3833	3009	7765
CDS	533526	534251	726	+	A10501;CDW43_RS02495methyltransferase domain-containing protein;;	57	7063	7107	1947	347	475	422	250	4185	5088	920	9316	10952	5214	3458	2797	7576
CDS	534251	534694	444	+	A10502;CDW43_RS02500ribonuclease HI;;	24	3404	3405	1135	213	142	225	184	2281	2978	317	6630	8513	4686	3164	2693	6752
CDS	534698	535429	732	+	A10503;CDW43_RS02505DNA polymerase III subunit epsilon;;	18	4792	4742	1674	68	74	138	92	3615	4226	632	3830	5743	3016	1757	1633	4592
CDS	535526	536083	558	+	A10504;CDW43_RS02510nucleotide exchange factor GrpE;;	25	9376	6933	2224	397	248	764	208	3739	6583	2599	1832	3042	1871	5054	4033	6752
CDS	536184	538106	1923	+	A10505;CDW43_RS02515molecular chaperone DnaK;;	619	88299	178520	15519	3249	1644	3449	1463	43814	114605	34281	41314	62112	42797	75313	57738	130562
CDS	538188	539300	1113	+	A10506;CDW43_RS02520molecular chaperone DnaJ;;	72	19164	16693	2670	251	119	250	171	8760	17044	2728	8653	16253	11675	17356	13869	34556
CDS	539386	540195	810	+	A10507;CDW43_RS025254-hydroxy-tetrahydrodipicolinate reductase;;	59	6058	5559	1792	124	153	179	136	4217	4583	1309	3578	7046	4931	6961	5667	14141
CDS	540196	540756	561	-	A10508;CDW43_RS02530hypothetical protein;;	41	2960	2615	1023	79	44	81	93	2119	2246	492	2172	3880	2682	3558	2750	5806
CDS	540776	543130	2355	-	A10509;CDW43_RS02535penicillin-binding protein 1B;;	45	6551	6240	2807	168	120	162	203	9044	7238	873	3788	6091	3900	3367	2813	7833
CDS	543358	544674	1317	+	A10510;CDW43_RS02540YjgN family protein;;	250	21810	19601	11226	637	723	858	810	22006	19560	4870	17799	28080	17120	15754	13354	29502
CDS	544677	545834	1158	+	A10511;CDW43_RS02545M48 family metallopeptidase;;	130	7956	5777	3084	151	89	173	144	7669	4963	1474	14324	25632	16655	11659	9808	30203
CDS	546030	546584	555	+	A10512;CDW43_RS02550thioredoxin family protein;;	460	35620	46890	15979	549	627	1083	1176	42361	27389	4474	11941	21453	13172	10460	9963	32142
CDS	546611	548599	1989	+	A10513;CDW43_RS02555transketolase;;	2439	136134	163590	41712	1022	896	1930	3316	164685	87097	30129	85844	166148	104364	111074	103747	245897
CDS	548811	549809	999	+	A10514;CDW43_RS02560type I glyceraldehyde-3-phosphate dehydrogenase;;	276	18547	18905	5642	303	348	427	1029	12934	7686	2604	18414	34350	22441	18866	17012	43127
CDS	549929	551113	1185	+	A10515;CDW43_RS02565phosphoglycerate kinase;;	184	15217	15918	6660	552	567	878	829	9465	8559	3369	15573	20962	10367	11716	9384	19029
CDS	551132	552598	1467	+	A10516;CDW43_RS02570pyruvate kinase;;	94	10729	13922	3626	260	232	333	438	5787	5917	1489	14513	19834	10800	9515	7917	17946
CDS	552623	553693	1071	+	A10517;CDW43_RS02575fructose-bisphosphate aldolase class II;;	94	9473	12360	3217	308	279	363	409	4664	4923	1366	14166	17216	8859	5881	4642	12191
CDS	553836	554210	375	+	A10518;CDW43_RS02580fluoride efflux transporter CrcB;;	30	6560	6374	2223	126	118	215	154	3653	3506	667	4492	6482	2796	2802	1931	5286
CDS	554207	554497	291	+	A10519;CDW43_RS02585DUF190 domain-containing protein;;	50	4026	4495	1736	96	102	170	155	2880	2946	513	3420	4757	2439	1617	1424	4528
CDS	554499	555773	1275	+	A10520;CDW43_RS02590serine--tRNA ligase;;	121	13904	15022	5125	223	221	468	348	15333	14826	2513	13927	21902	11320	10892	9054	20495
CDS	555766	556446	681	+	A10521;CDW43_RS02595site-2 protease family protein;;	48	4260	4609	1351	69	43	122	137	5512	4918	869	5751	9653	5823	6371	4720	11701
CDS	556482	557699	1218	+	A10522;CDW43_RS02600tryptophan--tRNA ligase;;	58	8685	9916	3181	169	177	231	257	10666	9831	1624	11055	17876	10096	8513	7236	21788
CDS	557717	558637	921	+	A10523;CDW43_RS02605pseudouridine synthase;;	63	8767	8495	2622	142	139	154	151	9756	9624	1575	9198	14657	8388	6191	5817	17119
CDS	558634	559560	927	-	A10524;CDW43_RS02610GGDEF domain-containing protein;;	47	12689	11673	4829	180	190	173	152	16208	31482	1476	5480	8463	5190	4318	4182	9692
CDS	559650	560411	762	-	A10525;CDW43_RS02615SDR family NAD(P)-dependent oxidoreductase;;	249	54738	46188	23530	816	789	1483	836	28765	30083	6749	39243	57165	31283	15258	14724	46847
CDS	560421	560786	366	-	A10526;CDW43_RS02620hypothetical protein;;	321	44521	34450	20647	1067	983	1748	1180	22352	24050	9269	28526	42404	21856	13768	11600	35629
CDS	560999	562315	1317	-	A10527;CDW43_RS02625hydroxysqualene dehydroxylase HpnE;;	44	10620	11488	3937	226	199	333	234	8229	7952	1485	7561	11614	6933	4541	3867	12393
CDS	562284	563141	858	-	A10528;CDW43_RS02630presqualene diphosphate synthase HpnD;;	37	9950	9279	4630	120	122	259	146	8593	6787	1416	9092	14758	8968	4856	4702	16112
CDS	563138	563440	303	-	A10529;CDW43_RS02635(2Fe-2S) ferredoxin;;	7	4495	4150	2334	103	111	97	58	4558	3663	730	3417	5427	3227	1932	1804	5885
CDS	563496	564464	969	-	A10530;CDW43_RS02640octaprenyl diphosphate synthase;;	90	12445	10648	6672	380	373	635	720	14806	12512	2209	10636	17070	10016	7610	6878	18283
CDS	564632	564943	312	+	A10531;CDW43_RS0264550S ribosomal protein L21;;	142	54045	51391	24319	1762	1428	2790	1358	50700	43652	6012	15361	26281	12411	20544	16206	31578
CDS	564972	565229	258	+	A10532;CDW43_RS0265050S ribosomal protein L27;;	155	32170	30732	14534	630	578	1231	884	30249	25049	3508	7033	12303	5975	10002	8264	15231
CDS	565326	566375	1050	+	A10533;CDW43_RS02655GTPase ObgE;;	95	10720	9521	3767	138	119	476	324	14955	12197	1903	8684	14306	8366	9425	8244	19996
CDS	566378	567508	1131	+	A10534;CDW43_RS02660glutamate 5-kinase;;	168	47985	43872	17442	761	653	834	586	31287	25727	3748	19903	32823	19629	17136	14371	32901
CDS	567571	567831	261	-	A10535;CDW43_RS0266530S ribosomal protein S20;;	147	55590	46994	16908	1864	1636	2293	1405	39496	36173	4229	33518	61116	30421	25683	21883	50225
CDS	567939	568718	780	+	A10536;CDW43_RS02670exodeoxyribonuclease III;;	9	2807	3158	1221	49	41	37	56	4413	3105	684	1265	2413	1352	1174	1169	2692
CDS	568774	568941	168	+	A10537;CDW43_RS02675DUF6435 family protein;;	7	1893	1734	826	162	223	261	99	1246	1065	219	1783	2925	1383	936	788	2805
CDS	569781	571907	2127	-	A10538;CDW43_RS02680DNA helicase RecQ;;	51	10261	11639	3344	159	192	332	197	7985	8085	1631	8831	14146	7429	6845	5406	11238
CDS	572136	572492	357	+	A10539;CDW43_RS02685hypothetical protein;;	3	3548	2978	1528	178	235	156	136	1541	1870	417	1059	1207	523	310	279	1112
CDS	573230	573577	348	+	A10540;CDW43_RS02695cupin domain-containing protein;;	8	2520	2552	882	68	53	71	35	3129	3085	479	2135	2887	1560	1239	975	2975
CDS	573680	573940	261	-	A10541;CDW43_RS02700helix-turn-helix transcriptional regulator;;	22	6059	7131	1463	701	512	493	255	3556	5366	1121	5408	6359	3239	2438	1941	4260
CDS	573942	574196	255	-	A10542;CDW43_RS02705type II toxin-antitoxin system mRNA interferase toxin, RelE/StbE family;;	5	3029	3352	1125	184	133	161	58	2382	3542	798	2079	2306	1163	1016	878	2006
CDS	575174	575623	450	-	A10543;CDW43_RS02710hypothetical protein;;	6	2734	2811	1293	76	87	51	54	2238	2477	397	2608	3516	1963	839	893	3603
CDS	575909	576184	276	-	A10544;CDW43_RS02715hypothetical protein;;	4	2041	1844	731	54	75	20	45	1546	1774	276	1468	1967	1129	446	392	2046
CDS	576261	577349	1089	-	A10545;CDW43_RS02720DNA polymerase IV;;	16	1680	1834	792	54	43	54	39	2015	2020	267	1403	1722	1011	710	636	1531
CDS	577671	579209	1539	+	A10546;CDW43_RS02725MFS transporter;;	59	5969	6998	2103	122	147	182	144	5291	5085	905	5363	9108	5185	4471	3390	9405
CDS	579221	579811	591	+	A10547;CDW43_RS02730hypothetical protein;;	13	2434	2649	918	28	74	51	46	2027	1593	313	1697	2813	1924	1591	1232	3682
CDS	579898	580281	384	+	A10548;CDW43_RS02735nuclear transport factor 2 family protein;;	121	12495	15603	3498	119	138	168	273	6313	5524	2417	16531	20513	9695	4752	3998	11898
CDS	580303	581664	1362	-	A10549;CDW43_RS02740nucleotide 5'-monophosphate nucleosidase PpnN;;	152	17018	19316	6452	188	133	295	256	11929	11133	2494	17664	25167	14355	8972	7693	23182
CDS	581814	582311	498	-	A10550;CDW43_RS02745single-stranded DNA-binding protein;;	81	18400	16301	6470	409	462	501	436	8789	9336	2751	14457	19200	9633	5937	5334	15681
CDS	582351	583736	1386	-	A10551;CDW43_RS02750MFS transporter;;	76	11728	10465	5088	239	284	434	413	9800	8902	1333	5530	8257	4279	4038	3097	8364
CDS	583787	586606	2820	+	A10552;CDW43_RS02755excinuclease ABC subunit UvrA;;	110	15397	14470	7508	267	234	432	320	13078	12507	2861	16793	25141	14048	12249	10072	26928
CDS	586603	587226	624	+	A10553;CDW43_RS02760CYTH domain-containing protein;;	47	7119	7307	2408	157	154	141	153	3919	4173	1304	7302	9282	4548	3170	2663	7325
CDS	587231	588277	1047	-	A10554;CDW43_RS02765energy transducer TonB;;	30	4938	4689	1980	102	84	89	88	3400	3065	658	4917	6773	4197	2228	2084	6592
CDS	588282	589328	1047	-	A10555;CDW43_RS02770FAD:protein FMN transferase;;	34	4267	4118	1983	85	62	180	157	4260	3622	734	4166	6328	3398	2960	2601	6015
CDS	589325	590269	945	-	A10556;CDW43_RS02775glutathione synthase;;	44	4486	4329	2529	160	154	220	163	5327	4643	843	2986	4452	2537	2445	1984	4557
CDS	590449	591378	930	+	A10557;CDW43_RS02780glycine--tRNA ligase subunit alpha;;	32	13328	13414	5273	107	120	223	120	13572	12863	1983	7541	12097	6356	4740	4368	11757
CDS	591381	593459	2079	+	A10558;CDW43_RS02785glycine--tRNA ligase subunit beta;;	152	18874	19165	6530	290	253	620	437	18860	17468	2906	22465	38584	21822	19662	16203	38089
CDS	593469	594008	540	+	A10559;CDW43_RS02790D-glycero-beta-D-manno-heptose 1,7-bisphosphate 7-phosphatase;;	42	5271	5165	1619	90	87	163	141	4719	4261	782	10413	16205	9273	6024	4877	14762
CDS	594008	594760	753	+	A10560;CDW43_RS02795lysophospholipid acyltransferase family protein;;	24	6595	6317	1800	76	93	181	120	5452	4682	698	9344	15536	9243	6138	5503	16850
CDS	594747	596828	2082	+	A10561;CDW43_RS02800EAL domain-containing protein;;	65	22869	21223	7577	289	253	448	411	21643	16460	3004	22801	37880	21830	12425	11450	39506
CDS	596881	597762	882	-	A10562;CDW43_RS02805protease HtpX;;	50	8340	7832	4996	331	361	1070	432	4927	4683	1637	4118	5592	3347	3585	2718	7151
CDS	597817	598914	1098	-	A10563;CDW43_RS02810ATP-grasp domain-containing protein;;	98	16339	18638	7525	652	761	837	616	6809	6659	1678	13588	15529	7742	4656	3844	11443
CDS	598939	599844	906	-	A10564;CDW43_RS02815methylenetetrahydromethanopterin dehydrogenase;;	132	13100	12211	5164	349	427	473	382	10563	7233	2029	9223	15827	9753	7416	6783	20780
CDS	599878	600888	1011	-	A10565;CDW43_RS02820beta-hydroxylase;;	81	16105	13078	4935	198	181	387	206	12633	9129	1965	10078	17701	10949	7903	7412	22864
CDS	600906	601772	867	-	A10566;CDW43_RS02825methylenetetrahydromethanopterin dehydrogenase;;	122	27936	22285	11500	418	292	1084	537	23465	20720	6049	18648	29933	17370	12341	11841	33914
CDS	601988	602350	363	+	A10567;CDW43_RS02830hypothetical protein;;	105	33112	37340	9538	1373	1951	1813	1055	6726	11820	3496	52982	51905	23533	5758	5084	26400
CDS	603125	603922	798	-	A10568;CDW43_RS02840quinoprotein dehydrogenase-associated SoxYZ-like carrier;;	167	48625	45401	14649	1403	1449	1976	1171	12776	16451	4208	42509	45209	20630	6872	6119	26318
CDS	603939	604871	933	-	A10569;CDW43_RS02845quinoprotein relay system zinc metallohydrolase 2;;	95	26619	23602	7521	657	783	866	593	9166	11867	4193	32959	36221	17022	7332	6179	23195
CDS	604961	606364	1404	+	A10570;CDW43_RS02850glutamate--tRNA ligase;;	38	8894	10887	4536	225	201	369	264	5232	5551	1239	14452	18068	9185	4376	3770	14226
CDS	606571	608349	1779	+	A10571;CDW43_RS02855methanol/ethanol family PQQ-dependent dehydrogenase;;	695	42299	48559	16639	8500	10217	11094	9043	21805	62051	15302	24303	37107	18874	24453	19060	37846
CDS	608487	609362	876	+	A10572;CDW43_RS02860quinoprotein dehydrogenase-associated putative ABC transporter substrate-binding protein;;	119	29930	24496	10426	1384	1740	2551	1361	8155	14412	4332	50682	59195	28403	8245	7255	37579
CDS	609400	609861	462	-	A10573;CDW43_RS02865DUF302 domain-containing protein;;	28	8971	6163	3222	254	313	290	156	3847	4418	862	6810	9018	5168	1937	1703	7364
CDS	609937	610620	684	+	A10574;CDW43_RS02870hypothetical protein;;	22	14461	11005	7024	460	524	811	383	7209	7794	2119	9841	12466	6191	2590	2260	10423
CDS	610678	612135	1458	+	A10575;CDW43_RS02875HAMP domain-containing protein;;	24	8024	6389	3239	195	233	425	235	5505	5190	1046	8307	12056	6235	3660	3566	13923
CDS	612330	613706	1377	+	A10576;CDW43_RS02880sigma-54 dependent transcriptional regulator;;	37	7833	7970	3265	182	120	145	139	6497	4768	936	5798	9024	5345	3631	3077	11595
CDS	613708	614115	408	-	A10577;CDW43_RS02885ClpXP protease specificity-enhancing factor;;	39	6609	7544	3403	85	111	160	145	10976	7540	773	5299	9513	6713	4997	4086	15492
CDS	614119	614739	621	-	A10578;CDW43_RS02890glutathione S-transferase N-terminal domain-containing protein;;	128	18919	21713	9764	214	275	374	335	26432	19356	2422	13605	24670	16299	12863	11779	37127
CDS	614772	615482	711	-	A10579;CDW43_RS02895cytochrome c1;;	190	27533	29432	15694	238	214	640	589	37262	27300	4405	22259	42313	28689	24662	23804	67124
CDS	615479	616690	1212	-	A10580;CDW43_RS02900cytochrome bc complex cytochrome b subunit;;	289	43478	44626	31435	483	400	1325	791	46144	34321	6458	29307	52634	32601	33021	30317	76254
CDS	616690	617283	594	-	A10581;CDW43_RS02905ubiquinol-cytochrome c reductase iron-sulfur subunit;;	138	29239	30168	22339	530	475	953	608	29378	24134	5445	18742	33122	19383	16985	15642	42222
CDS	617455	617901	447	-	A10582;CDW43_RS02910plastocyanin/azurin family copper-binding protein;;	44	21260	9049	10540	268	339	490	347	13077	15470	4687	37492	84023	52463	37068	31645	117229
CDS	618933	619199	267	+	A10583;CDW43_RS02915zinc ribbon domain-containing protein;;	33	10161	10913	4852	407	258	675	344	5850	6913	2069	7371	9181	4312	5400	3854	7397
CDS	619208	619840	633	+	A10584;CDW43_RS02920DUF502 domain-containing protein;;	43	15358	15705	6740	196	164	470	252	11085	12888	2652	6758	9471	4452	5845	4475	8490
CDS	619912	621690	1779	+	A10585;CDW43_RS02925aspartate--tRNA ligase;;	209	33472	36853	11318	652	472	1017	1009	41919	43210	5940	34336	58598	35440	28948	23568	70276
CDS	621733	622845	1113	+	A10586;CDW43_RS02930quinolinate synthase NadA;;	146	23399	28796	6338	466	285	627	670	23144	26469	4485	29204	44148	26848	21209	17603	50855
CDS	622863	623048	186	+	A10587;CDW43_RS02935zinc-finger domain-containing protein;;	24	3518	4696	1018	69	57	113	112	3165	3612	594	4735	7083	4307	3287	2715	7675
CDS	623052	623453	402	+	A10588;CDW43_RS029408-oxo-dGTP diphosphatase MutT;;	17	10446	11351	3379	103	143	176	130	5465	6198	1256	4377	5791	3135	2612	1993	5461
CDS	623510	623695	186	-	A10589;CDW43_RS02945DNA gyrase inhibitor YacG;;	10	3574	3842	1327	63	85	90	76	2583	2456	456	1741	2496	1501	1057	875	2610
CDS	623698	624468	771	-	A10590;CDW43_RS02950cell division protein ZapD;;	60	13181	13911	3862	389	446	389	284	10504	10192	2416	11465	15243	8385	4031	3418	14678
CDS	624514	625122	609	-	A10591;CDW43_RS02955dephospho-CoA kinase;;	46	5480	5607	1653	158	142	223	150	3547	3473	962	5925	9151	5756	2943	2418	10559
CDS	625124	625993	870	-	A10592;CDW43_RS02960A24 family peptidase;;	75	6320	4693	1740	109	92	160	121	2103	2243	552	10647	18134	10127	6373	4746	17653
CDS	625998	627245	1248	-	A10593;CDW43_RS02965type II secretion system F family protein;;	178	27091	16956	6990	366	304	428	518	8579	8592	3365	44179	59175	31291	12198	10499	46566
CDS	627249	628967	1719	-	A10594;CDW43_RS02970type IV-A pilus assembly ATPase PilB;;	208	36671	34808	13304	766	914	1118	1017	18518	19335	5691	51266	67037	35579	15032	13419	52002
CDS	629173	629301	129	+	A10595;CDW43_RS02975lipoprotein;;	2	2656	3351	803	32	31	64	26	2575	2995	515	1596	2211	1186	756	670	1558
CDS	629304	630557	1254	+	A10596;CDW43_RS02980diaminopimelate decarboxylase;;	92	10352	11882	3988	203	203	346	200	9300	9700	2120	17534	24712	12682	7703	6806	19283
CDS	630565	631410	846	+	A10597;CDW43_RS02985diaminopimelate epimerase;;	113	7126	7185	2515	161	103	357	229	4255	4514	1325	12269	17550	8557	5360	4381	13699
CDS	631386	632096	711	+	A10598;CDW43_RS02990DUF484 family protein;;	128	6609	7382	2323	150	142	348	238	4553	4856	1042	14490	20677	11563	6582	5817	15961
CDS	632086	632994	909	+	A10599;CDW43_RS02995tyrosine recombinase XerC;;	59	5614	6703	2006	64	85	121	72	3765	3693	688	7387	11684	6454	4533	3567	10711
CDS	633249	634268	1020	+	A10600;CDW43_RS03000sodium:calcium antiporter;;	14	3761	5074	1387	67	50	85	53	2241	2930	603	3094	4631	2417	1522	1313	3980
CDS	634762	635799	1038	-	A10601;CDW43_RS03005IS110 family transposase;;	95	3383	5461	1848	58	77	80	96	1123	1393	401	1271	1689	788	808	566	1468
CDS	635976	637373	1398	-	A10602;CDW43_RS03010FAD-binding domain-containing protein;;	24	3236	4099	1314	59	70	104	101	2096	2396	569	3354	4937	2785	1639	1528	5576
CDS	637383	638915	1533	-	A10603;CDW43_RS03015cryptochrome/photolyase family protein;;	26	4685	5893	1654	126	133	156	96	1801	2130	597	5123	6012	3021	1969	1576	5210
CDS	638908	639321	414	-	A10604;CDW43_RS03020DUF3429 domain-containing protein;;	11	829	808	391	28	30	43	43	359	446	112	949	1266	624	625	448	1143
CDS	639318	640766	1449	-	A10605;CDW43_RS03025exonuclease domain-containing protein;;	27	4846	5199	1931	94	82	87	68	2383	2955	703	4429	5147	2549	1513	1324	4014
CDS	640763	640915	153	-	A10606;CDW43_RS03030DUF2256 domain-containing protein;;	14	1548	1578	608	41	46	42	27	1211	1295	265	1142	1561	894	642	487	1692
CDS	641083	641967	885	+	A10607;CDW43_RS03035IS982 family transposase;;	17	3896	4667	1332	88	100	99	71	3473	3782	523	3233	4278	2399	1135	1060	3948
CDS	641998	642549	552	-	A10608;CDW43_RS03040oligoribonuclease;;	51	11591	11663	3497	433	467	421	315	9293	10390	2408	12858	15437	7797	4035	3546	11929
CDS	642659	643906	1248	+	A10609;CDW43_RS03045M48 family metallopeptidase;;	366	20466	19442	8748	675	697	1023	1037	11827	12687	3835	24270	28578	11839	10053	7386	17987
CDS	643910	644185	276	+	A10610;CDW43_RS03050cytochrome c;;	113	4305	4255	1855	118	86	194	159	2818	2718	663	7654	10084	4614	3715	2881	6035
CDS	644186	645223	1038	-	A10611;CDW43_RS03055GGDEF domain-containing protein;;	23	9982	9600	5019	113	166	209	122	8829	7701	1084	5981	8313	5133	2632	2339	9592
CDS	645250	646503	1254	-	A10612;CDW43_RS03060MFS transporter;;	78	10268	10765	4055	126	113	172	107	8530	8040	1061	6044	9852	6349	3855	3391	9591
CDS	646511	646957	447	-	A10613;CDW43_RS03065universal stress protein;;	64	13894	17810	4508	101	106	251	157	13227	15282	2295	7768	12365	6195	4642	4030	10201
CDS	647012	647950	939	-	A10614;CDW43_RS03070thioredoxin-disulfide reductase;;	202	27953	36199	9967	322	393	751	398	27700	28221	7246	22616	34094	17599	12831	10750	28453
CDS	648353	650656	2304	+	A10615;CDW43_RS03075DNA translocase FtsK;;	278	24630	24834	7488	613	527	1008	665	16953	17818	2621	24409	34582	18224	15084	11271	27265
CDS	650717	651349	633	+	A10616;CDW43_RS03080outer membrane lipoprotein chaperone LolA;;	189	7314	7139	2833	206	271	378	350	6303	6036	1033	16849	21270	10638	5022	4260	15892
CDS	651349	652671	1323	+	A10617;CDW43_RS03085replication-associated recombination protein A;;	133	11827	19916	3803	164	151	301	230	10924	12652	1246	13907	20135	9249	6825	5498	15852
CDS	652678	653427	750	-	A10618;CDW43_RS03090class I SAM-dependent methyltransferase;;	29	5560	6593	2062	99	108	223	127	3482	3547	611	7178	10936	6823	4332	3561	11952
CDS	653440	654432	993	-	A10619;CDW43_RS03095beta-propeller fold lactonase family protein;;	45	7883	7220	3433	221	257	415	187	4917	5663	1204	11175	17025	10164	4953	4487	17894
CDS	654432	654995	564	-	A10620;CDW43_RS03100SRPBCC family protein;;	156	33389	39346	17880	816	1078	1348	1564	22100	24604	6199	27296	43466	26512	9954	10470	49490
CDS	655198	656004	807	+	A10621;CDW43_RS03105ABC transporter ATP-binding protein;;	137	24112	26021	6945	374	413	827	439	20313	18919	3707	18404	24334	12970	12731	10251	20863
CDS	656001	656783	783	+	A10622;CDW43_RS03110lipid asymmetry maintenance ABC transporter permease subunit MlaE;;	80	11058	11308	3473	306	237	579	382	8459	7791	1347	13273	18828	9974	9402	7901	18168
CDS	656784	657248	465	+	A10623;CDW43_RS03115outer membrane lipid asymmetry maintenance protein MlaD;;	72	9143	9028	2964	158	106	339	325	11943	10594	1533	16573	25079	14574	8986	8086	23968
CDS	657250	657876	627	+	A10624;CDW43_RS03120ABC transporter substrate-binding protein;;	144	15476	15217	4169	205	144	396	417	20278	17478	3032	28722	44361	26276	14841	13920	43238
CDS	657873	658169	297	+	A10625;CDW43_RS03125STAS domain-containing protein;;	16	6172	6265	1643	37	30	106	107	7995	6584	983	5534	8101	4095	3312	2948	8244
CDS	658191	658415	225	+	A10626;CDW43_RS03130BolA/IbaG family iron-sulfur metabolism protein;;	51	6481	6766	1766	46	43	119	129	9018	7688	1173	7507	12077	7189	5369	4719	13514
CDS	658446	659732	1287	+	A10627;CDW43_RS03135UDP-N-acetylglucosamine 1-carboxyvinyltransferase;;	129	14367	16854	3794	88	75	228	254	22985	18333	2293	22046	37955	21418	18449	16470	41434
CDS	659725	660369	645	+	A10628;CDW43_RS03140ATP phosphoribosyltransferase;;	39	5786	7064	1615	56	67	93	75	11514	8569	1011	7524	13927	7996	6383	5738	16389
CDS	660362	661666	1305	+	A10629;CDW43_RS03145histidinol dehydrogenase;;	190	25367	28900	8734	636	546	893	708	35443	30710	4629	25864	40504	23647	20612	18607	47094
CDS	661666	662721	1056	+	A10630;CDW43_RS03150histidinol-phosphate transaminase;;	49	12889	13426	4767	219	192	315	265	21157	16424	1912	14989	23974	14152	12969	11018	27716
CDS	662718	663386	669	-	A10631;CDW43_RS03155DUF4124 domain-containing protein;;	43	6948	5570	2722	338	298	257	194	6997	6353	905	5005	6834	3596	3119	2564	5781
CDS	663414	664175	762	+	A10632;CDW43_RS03160sulfite exporter TauE/SafE family protein;;	36	2006	2616	715	54	87	97	64	1116	1132	276	1133	1750	982	889	575	1851
CDS	664446	665087	642	-	A10633;CDW43_RS03170orotate phosphoribosyltransferase;;	29	4771	5331	1604	57	64	83	78	3350	2665	610	4242	7615	4447	3030	2782	9516
CDS	665084	665686	603	-	A10634;CDW43_RS03175methionine biosynthesis protein MetW;;	35	3945	3987	1551	29	46	79	48	3779	3078	694	4081	7792	5142	3019	2777	9994
CDS	665686	666834	1149	-	A10635;CDW43_RS03180homoserine O-acetyltransferase;;	71	7579	7654	2696	105	104	168	183	5762	5259	1305	7810	13491	8256	6360	5358	16019
CDS	666856	667431	576	-	A10636;CDW43_RS03185YggT family protein;;	50	6015	6350	2235	146	116	202	190	4267	3908	1029	5806	8362	4857	2977	2778	7755
CDS	667424	668257	834	-	A10637;CDW43_RS03190pyrroline-5-carboxylate reductase;;	117	6461	5769	2451	255	215	377	304	5184	5267	1673	8109	12282	6869	4488	3852	10834
CDS	668306	669004	699	-	A10638;CDW43_RS03195YggS family pyridoxal phosphate-dependent enzyme;;	18	3566	3697	1395	76	86	86	108	2513	2596	808	2620	3624	1951	1606	1263	3078
CDS	669096	670133	1038	+	A10639;CDW43_RS03200type IV pilus twitching motility protein PilT;;	107	18264	14683	4427	401	460	364	366	5751	8038	4240	36363	41726	21040	9064	8601	29482
CDS	670143	671285	1143	+	A10640;CDW43_RS03205PilT/PilU family type 4a pilus ATPase;;	68	24377	18324	6351	345	316	528	541	6433	7906	3194	46698	56255	27386	9498	8047	39191
CDS	671458	672309	852	+	A10641;CDW43_RS03210OmpA family protein;;	581	101186	122084	38248	3147	3351	3406	3789	39679	44373	12227	186577	235051	106785	37354	34430	132117
CDS	672711	672902	192	+	A10642;CDW43_RS03215CsbD family protein;;	0	842	759	452	14	6	23	3	569	769	85	128	148	75	110	70	144
CDS	673118	673678	561	+	A10643;CDW43_RS03220BON domain-containing protein;;	16	4190	3589	1332	799	627	369	668	2019	3666	503	1077	1217	585	480	360	1019
CDS	673686	674147	462	+	A10644;CDW43_RS03225hypothetical protein;;	12	7968	8651	2510	626	427	501	358	2716	3378	675	1607	2061	868	522	432	1372
CDS	674368	675594	1227	+	A10645;CDW43_RS03230sigma-54 dependent transcriptional regulator;;	66	14109	14131	5433	516	445	412	386	4824	5391	1298	8649	8715	3917	1775	1400	4753
CDS	675773	677086	1314	-	A10646;CDW43_RS03235type II toxin-antitoxin system HipA family toxin;;	20	4565	5886	2336	140	107	138	139	2513	2643	1276	2791	3649	1985	1194	1213	2751
CDS	677088	677339	252	-	A10647;CDW43_RS03240helix-turn-helix domain-containing protein;;	0	1045	1633	623	49	26	50	29	614	683	695	585	620	292	342	304	434
CDS	677584	677754	171	+	A10648;CDW43_RS03245hypothetical protein;;	2	1031	825	532	5	9	6	8	990	1136	150	280	506	277	150	90	449
CDS	677744	678133	390	+	A10649;CDW43_RS03250hypothetical protein;;	18	5332	4422	2144	97	102	168	83	3827	3897	663	1394	1981	1118	661	581	1979
CDS	678415	680922	2508	-	A10651;CDW43_RS03260glycogen/starch/alpha-glucan phosphorylase;;	73	17322	16206	5880	378	517	1013	1758	17708	13780	3726	20139	28785	16598	8058	7537	32308
CDS	681129	681743	615	-	A10652;CDW43_RS03265ribosome biogenesis GTP-binding protein YihA/YsxC;;	24	6968	6222	2964	204	224	208	171	7931	6149	930	3493	6154	3468	2602	2229	6752
CDS	681829	682437	609	+	A10653;CDW43_RS03270c-type cytochrome;;	194	24092	18457	14632	980	868	1665	870	27953	21041	6228	21082	31464	16438	15067	12833	33083
CDS	682513	684519	2007	+	A10654;CDW43_RS03275cytochrome c biogenesis protein ResB;;	124	23739	17954	11241	275	382	744	379	28093	17511	3305	19804	34145	21139	15258	13853	43287
CDS	684560	685708	1149	+	A10655;CDW43_RS03280c-type cytochrome biogenesis protein CcsB;;	658	31704	40674	12248	1441	1378	2051	2099	14886	12992	3190	54735	62955	31169	18087	14106	43447
CDS	685730	686371	642	+	A10656;CDW43_RS03285thiol:disulfide interchange protein DsbA/DsbL;;	120	19917	20749	8065	337	328	654	859	10732	8343	2264	22035	27149	13146	5558	5169	18669
CDS	686424	687845	1422	-	A10657;CDW43_RS03290membrane-bound lytic murein transglycosylase MltF;;	45	15475	14063	6512	375	388	396	410	11091	10189	1589	5496	7497	4284	3033	2510	8611
CDS	687924	688373	450	-	A10658;CDW43_RS03295tRNA adenosine(34) deaminase TadA;;	23	3506	3706	1202	98	93	126	109	2145	1960	351	1841	3038	1840	1592	1193	3230
CDS	688360	689583	1224	-	A10659;CDW43_RS03300lipid IV(A) 3-deoxy-D-manno-octulosonic acid transferase;;	42	10475	11419	3570	235	248	293	277	6165	6194	1185	5314	8211	4829	3112	2632	8493
CDS	689785	690639	855	+	A10660;CDW43_RS03305LpxL/LpxP family Kdo(2)-lipid IV(A) lauroyl/palmitoleoyl acyltransferase;;	23	14352	11795	4184	231	198	270	171	8355	7996	1832	7008	9815	5024	2907	2409	8969
CDS	690636	691124	489	-	A10661;CDW43_RS03310acyloxyacyl hydrolase;;	47	29282	20988	5664	309	186	343	182	12062	11848	5105	16028	19990	9660	5580	4762	14412
CDS	691250	691639	390	-	A10662;CDW43_RS0331530S ribosomal protein S9;;	387	49076	59104	23086	1088	948	2076	1505	69282	57345	6789	16847	31107	17849	26351	21515	39196
CDS	691652	692080	429	-	A10663;CDW43_RS0332050S ribosomal protein L13;;	537	98609	118193	44133	1874	2304	3600	2363	120682	99376	12019	30739	51740	30820	24961	23758	64614
CDS	692167	692964	798	-	A10664;CDW43_RS03325undecaprenyl-diphosphate phosphatase;;	44	12047	11169	3889	326	370	491	345	8237	8283	1404	10639	13346	6719	3065	2503	9573
CDS	693088	696945	3858	+	A10665;CDW43_RS03330DUF3683 domain-containing protein;;	266	93884	127551	15812	881	785	1055	1272	56442	73802	10202	49986	64331	32251	20985	17292	42397
CDS	697007	697354	348	-	A10666;CDW43_RS03335HopJ type III effector protein;;	28	6693	8576	1230	41	105	71	91	4029	5023	595	4909	6711	3844	2100	2014	5057
CDS	697370	698035	666	-	A10667;CDW43_RS03340nitroreductase;;	22	2951	3871	850	45	60	69	65	2478	2822	643	2433	3572	1859	1277	1167	3339
CDS	698025	698414	390	-	A10668;CDW43_RS03345YbaN family protein;;	9	856	1029	309	23	50	54	38	819	990	230	1239	1717	975	567	445	1562
CDS	698756	698878	123	+	A10669;CDW43_RS16800hypothetical protein;;	3	618	603	223	28	39	26	19	427	487	101	526	583	300	203	175	628
CDS	698930	699838	909	+	A10670;CDW43_RS03350ribosome biogenesis GTPase YlqF;;	40	9822	9009	3523	856	1102	521	305	7216	7832	1624	8829	10629	4901	2800	2457	7065
CDS	699922	700437	516	+	A10671;CDW43_RS03355Slp family lipoprotein;;	24	4267	4223	1798	370	440	420	239	2247	2510	640	4515	4851	2312	1073	826	3138
CDS	700546	700731	186	+	A10672;CDW43_RS03360hypothetical protein;;	1172	11023	25241	1203	28	24	52	29	467	585	8958	333	454	236	225	176	466
CDS	700734	701000	267	+	A10673;CDW43_RS03365hypothetical protein;;	2537	16672	42011	1832	48	47	141	85	766	798	12673	1089	1401	741	530	471	1306
CDS	701031	701249	219	+	A10674;CDW43_RS03370hypothetical protein;;	982	10075	24022	1179	9	15	58	36	463	440	6167	311	432	206	126	90	282
CDS	701422	702129	708	+	A10675;CDW43_RS03375hypothetical protein;;	312	13664	18769	3540	296	321	369	344	4506	5021	2457	10588	13559	6768	3963	3343	11212
CDS	702176	703132	957	+	A10676;CDW43_RS03380hypothetical protein;;	166	14648	17537	5351	487	510	485	426	6568	7324	2125	11737	15615	8337	3431	2882	14099
CDS	703129	704595	1467	+	A10677;CDW43_RS03385decarboxylating NADP(+)-dependent phosphogluconate dehydrogenase;;	421	23582	27687	9071	536	415	841	728	9832	10977	3687	26817	34493	15836	8967	7090	26794
CDS	704655	705521	867	-	A10678;CDW43_RS03390SdiA-regulated domain-containing protein;;	29	5725	4831	2458	67	111	132	126	4653	4347	962	2448	3963	2168	1804	1311	3259
CDS	705647	706078	432	-	A10679;CDW43_RS03395DUF6524 family protein;;	27	4545	4279	1666	131	109	162	144	2648	2632	579	3458	4428	2550	1533	1095	3784
CDS	706105	706380	276	-	A10680;CDW43_RS03400acylphosphatase;;	14	4969	4693	1848	82	62	144	131	2870	2660	605	1732	2274	1129	745	540	1977
CDS	706740	707525	786	-	A10681;CDW43_RS03405hypothetical protein;;	25	11104	11015	3787	234	257	231	232	5508	5484	1162	5048	7460	4480	2327	2013	7668
CDS	707593	708462	870	-	A10682;CDW43_RS03410HD domain-containing protein;;	28	7883	8107	3089	474	380	146	93	3535	3713	662	5507	7023	3823	2171	1701	5205
CDS	708490	709455	966	-	A10683;CDW43_RS03415hypothetical protein;;	34	11396	14177	4864	1008	1358	490	189	4520	4584	1226	4970	4361	2324	1076	935	2915
CDS	709842	710600	759	+	A10684;CDW43_RS03420hypothetical protein;;	24	8978	7533	3250	268	285	417	304	4680	4631	1040	5524	6617	3579	1502	1456	5446
CDS	711067	711681	615	-	A10685;CDW43_RS03425hypothetical protein;;	33	12832	11180	5566	234	232	304	249	7005	6910	1846	17431	19556	10141	3773	3526	13704
CDS	711693	712331	639	-	A10686;CDW43_RS03430hypothetical protein;;	36	13076	11337	5563	271	278	231	223	6598	6976	2499	14614	14937	6847	2774	2296	9003
Pseudo	712496	712753	258	-	A10687;CDW43_RS16645integrase;partial;pseudo	6	2862	2644	833	29	20	46	29	2403	2367	334	1404	2020	1052	764	572	2046
CDS	713334	713951	618	-	A10688;CDW43_RS03440DUF6088 family protein;;	0	6503	2328	104	25	16	33	0	4005	4130	833	5847	8191	4222	2084	1689	6269
CDS	714316	716967	2652	-	A10689;CDW43_RS03445DEAD/DEAH box helicase family protein;;	0	5892	3190	70	53	20	51	28	14557	10822	1211	15436	25537	14156	12919	9840	21184
CDS	716970	718769	1800	-	A10690;CDW43_RS03450site-specific DNA-methyltransferase;;	0	4726	2189	56	53	53	60	14	11904	9241	1296	11608	19471	11244	6719	5765	17954
CDS	718769	720553	1785	-	A10691;CDW43_RS03455AAA family ATPase;;	0	4568	2992	43	42	16	42	0	13856	12547	1959	12700	19710	11072	8790	6666	15493
CDS	720679	721539	861	-	A10692;CDW43_RS03460nucleotidyl transferase AbiEii/AbiGii toxin family protein;;	0	1920	1250	18	36	6	23	4	4450	4598	578	5408	8590	4549	3918	2866	5784
CDS	721536	722363	828	-	A10693;CDW43_RS03465type IV toxin-antitoxin system AbiEi family antitoxin;;	0	4555	2953	46	44	8	60	4	5074	6557	1313	10643	18042	9813	9352	6520	12685
CDS	722499	723743	1245	-	A10694;CDW43_RS03470abortive infection family protein;;	8	9819	7505	132	54	34	100	11	12313	12613	1577	7598	12564	6925	6438	5166	12018
CDS	723757	724926	1170	-	A10695;CDW43_RS03475XRE family transcriptional regulator;;	0	17523	19898	176	153	79	220	48	13864	20513	3233	16304	22870	12563	10839	8114	19819
CDS	724937	725590	654	-	A10696;CDW43_RS03480hypothetical protein;;	4	28993	37220	303	376	160	386	83	15481	31951	10237	22880	28164	12133	9527	7408	15358
CDS	725666	725905	240	-	A10697;CDW43_RS03485DUF2274 domain-containing protein;;	0	305	132	10	5	0	2	0	500	542	106	489	799	440	377	302	738
CDS	725902	727212	1311	-	A10698;CDW43_RS03490TrbI/VirB10 family protein;;	0	407	295	11	19	2	29	2	729	809	204	991	1488	747	752	507	1139
CDS	727215	728210	996	-	A10699;CDW43_RS03495P-type conjugative transfer protein TrbG;;	0	72	60	2	2	6	4	0	79	122	33	197	245	135	88	92	153
CDS	728207	728911	705	-	A10700;CDW43_RS03500conjugal transfer protein TrbF;;	4	50	52	0	4	0	4	0	18	34	4	105	128	62	55	23	86
CDS	728924	730219	1296	-	A10701;CDW43_RS03505P-type conjugative transfer protein TrbL;;	0	57	51	4	10	0	0	0	52	87	19	154	167	92	105	82	109
CDS	730251	730982	732	-	A10702;CDW43_RS03510P-type conjugative transfer protein TrbJ;;	0	33	24	0	15	0	7	2	38	53	22	94	123	44	51	45	82
CDS	730979	733417	2439	-	A10703;CDW43_RS03515conjugal transfer protein TrbE;;	0	127	119	7	21	6	30	0	156	202	46	319	388	217	198	171	257
CDS	733427	733699	273	-	A10704;CDW43_RS03520VirB3 family type IV secretion system protein;;	0	21	21	0	2	1	4	1	22	14	6	65	85	31	23	21	43
CDS	733696	734049	354	-	A10705;CDW43_RS03525TrbC/VirB2 family protein;;	0	47	35	2	8	2	7	0	55	33	15	77	157	65	52	52	69
CDS	734046	735065	1020	-	A10706;CDW43_RS03530P-type conjugative transfer ATPase TrbB;;	0	131	192	4	12	16	21	2	120	145	47	492	604	280	257	147	261
CDS	735062	735568	507	-	A10707;CDW43_RS03535CopG family transcriptional regulator;;	0	9	14	0	3	0	13	0	71	50	14	37	53	44	26	27	30
CDS	735565	737559	1995	-	A10708;CDW43_RS03540conjugal transfer protein TraG;;	0	315	283	5	46	11	46	4	594	749	198	734	1039	584	548	477	692
CDS	737778	738059	282	-	A10709;CDW43_RS03545EexN family lipoprotein;;	0	227	186	5	2	2	36	1	222	360	114	287	387	196	175	111	281
CDS	738062	738997	936	-	A10710;CDW43_RS03550LysR substrate-binding domain-containing protein;;	0	1053	1490	30	38	8	151	5	979	1669	1341	2324	2947	1287	1145	881	1637
CDS	739206	739814	609	+	A10711;CDW43_RS03555TetR/AcrR family transcriptional regulator;;	2	2050	4016	39	332	57	739	20	2216	3726	3630	3945	5115	2673	2114	1579	2869
CDS	739903	740943	1041	+	A10712;CDW43_RS03560secretion protein HlyD;;	0	836	1758	11	87	22	426	0	1559	2171	1052	2406	3550	1644	1876	1493	2414
CDS	740945	742729	1785	+	A10713;CDW43_RS03565ATP-binding cassette domain-containing protein;;	0	2379	3990	32	84	21	424	18	3428	4785	1176	6449	9793	5294	4897	3700	7102
CDS	742726	743895	1170	+	A10714;CDW43_RS03570ABC transporter permease;;	0	948	1388	15	28	4	40	0	1282	1816	356	1884	2850	1381	1272	1048	2224
CDS	743901	745025	1125	+	A10715;CDW43_RS03575ABC transporter permease;;	0	779	950	6	32	0	12	0	1053	1269	205	1789	2598	1490	1152	861	2307
CDS	745022	746536	1515	+	A10716;CDW43_RS03580TolC family protein;;	0	1359	1795	13	58	18	39	6	1718	1916	368	3723	5878	3149	3184	2300	5040
CDS	746533	746850	318	+	A10717;CDW43_RS03585MBL fold metallo-hydrolase;;	0	1381	831	18	31	24	25	6	1126	1152	233	1935	2730	1358	1036	825	2029
CDS	747011	747469	459	+	A10718;CDW43_RS03590cytochrome c;;	0	2792	1377	46	28	18	53	6	3479	3614	618	3649	4557	2218	1361	1361	3733
CDS	747606	749555	1950	-	A10719;CDW43_RS03595relaxase/mobilization nuclease and DUF3363 domain-containing protein;;	0	1378	860	20	19	17	28	6	1873	2217	323	2573	3358	1978	1347	1242	2753
CDS	749962	750516	555	-	A10720;CDW43_RS03600S26 family signal peptidase;;	0	92	39	0	6	0	8	0	53	98	16	99	153	71	50	32	81
CDS	750513	751007	495	-	A10721;CDW43_RS03605DUF2840 domain-containing protein;;	0	123	50	1	17	0	8	1	110	113	21	300	457	239	257	213	322
CDS	751043	751294	252	-	A10722;CDW43_RS03610chromosome partitioning protein ParB;;	0	36	40	4	9	6	9	4	70	70	13	167	260	173	145	123	159
CDS	751291	751929	639	-	A10723;CDW43_RS03615ParA family partition ATPase;;	0	40	77	1	20	8	13	10	83	68	10	187	233	120	125	104	155
CDS	752180	753016	837	-	A10724;CDW43_RS03620replication initiator protein A;;	0	200	189	5	36	18	77	4	105	135	47	364	468	188	191	123	205
CDS	753031	753321	291	-	A10725;CDW43_RS03625helix-turn-helix domain-containing protein;;	0	205	131	5	15	8	60	2	160	176	51	127	195	82	115	52	89
CDS	753405	754196	792	-	A10726;CDW43_RS03630DUF2285 domain-containing protein;;	0	366	545	11	32	11	78	2	375	479	101	498	728	421	484	418	634
CDS	754546	754893	348	-	A10727;CDW43_RS03635DUF2958 domain-containing protein;;	2	114	215	7	8	0	1	1	338	434	66	399	615	265	338	222	394
CDS	755094	755237	144	-	A10728;CDW43_RS16245hypothetical protein;;	0	38	27	0	2	0	0	1	76	81	14	86	85	86	73	43	137
CDS	755342	755632	291	+	A10729;CDW43_RS03640helix-turn-helix transcriptional regulator;;	0	1373	1149	45	38	11	16	0	1547	1856	777	3737	5822	2848	2679	1799	3828
CDS	755679	755987	309	-	A10730;CDW43_RS03645DUF736 domain-containing protein;;	1	1178	1138	35	25	12	33	2	1275	1842	513	2321	3438	1808	1833	1213	2315
CDS	756866	757372	507	-	A10731;CDW43_RS03650DNA repair protein RadC;;	0	155	101	3	0	0	4	1	183	174	55	338	432	252	223	160	366
CDS	757829	759052	1224	+	A10732;CDW43_RS03655hypothetical protein;;	0	9030	2781	76	127	102	161	24	8540	8178	1737	14781	19719	10187	5070	4525	14222
CDS	759049	759537	489	+	A10733;CDW43_RS03660DUF6521 family protein;;	0	1733	538	15	11	2	10	6	2063	1940	276	3484	4867	2599	1795	1563	3604
CDS	759534	761477	1944	+	A10734;CDW43_RS03665DUF3732 domain-containing protein;;	0	5642	1678	41	34	19	82	14	7527	5587	1138	11289	15753	9015	3802	3664	10822
CDS	761628	761975	348	+	A10735;CDW43_RS03670AlpA family phage regulatory protein;;	0	461	234	2	9	6	34	5	736	694	132	1606	1835	789	798	626	1118
CDS	762297	763235	939	-	A10736;CDW43_RS03680nucleotidyl transferase AbiEii/AbiGii toxin family protein;;	0	1327	1188	36	57	12	21	2	1490	2165	720	4758	6178	2784	2308	1687	3830
CDS	763219	764223	1005	-	A10737;CDW43_RS03685type IV toxin-antitoxin system AbiEi family antitoxin domain-containing protein;;	0	1789	1456	41	57	14	29	0	1740	2298	2204	3318	3995	1466	1608	1178	2020
CDS	764220	765476	1257	-	A10738;CDW43_RS03690tyrosine-type recombinase/integrase;;	0	1447	848	21	10	8	19	0	2773	2822	260	1393	2192	1369	1325	1026	2291
CDS	765775	767352	1578	-	A10739;CDW43_RS03695glutamine-hydrolyzing GMP synthase;;	99	31836	27727	9936	354	406	591	363	23060	22594	2603	20084	30804	17261	15656	12455	29039
CDS	767414	768877	1464	-	A10740;CDW43_RS03700IMP dehydrogenase;;	182	44608	40190	19031	1028	854	1409	678	30216	35652	5530	23059	31902	16313	14982	12629	27836
CDS	768940	770442	1503	+	A10741;CDW43_RS03705exodeoxyribonuclease VII large subunit;;	88	12643	9763	4206	355	340	526	359	7237	7769	1453	13778	17905	9292	6083	5113	13230
CDS	770439	771275	837	+	A10742;CDW43_RS03710peptidoglycan DD-metalloendopeptidase family protein;;	23	5864	4564	1964	54	70	112	109	3188	3518	450	4614	7206	3644	2879	2189	5962
CDS	771257	773941	2685	-	A10743;CDW43_RS03715ABC transporter substrate-binding protein;;	77	15186	13563	8156	390	356	402	418	6845	8896	1674	14246	18539	10033	4649	3742	15226
CDS	774335	775060	726	-	A10744;CDW43_RS03720LPS export ABC transporter ATP-binding protein;;	51	6033	5650	2202	113	81	88	124	5122	5081	469	6273	10095	5879	4174	3336	10328
CDS	775074	775883	810	-	A10745;CDW43_RS03725lipopolysaccharide transport periplasmic protein LptA;;	59	12866	11042	4839	262	193	310	165	8894	8998	1637	10735	13840	7185	3796	3471	12558
CDS	775864	776433	570	-	A10746;CDW43_RS03730LPS export ABC transporter periplasmic protein LptC;;	47	11573	9866	4704	240	309	412	269	6787	6886	1420	8908	10225	5586	3114	2797	9314
CDS	776417	776938	522	-	A10747;CDW43_RS037353-deoxy-manno-octulosonate-8-phosphatase KdsC;;	44	8307	6429	3084	253	332	417	311	5143	5216	1073	7569	9182	5001	3338	2824	8521
CDS	776954	777931	978	-	A10748;CDW43_RS03740KpsF/GutQ family sugar-phosphate isomerase;;	100	7986	6684	3132	395	363	567	310	8952	8586	1646	11409	17047	8860	7860	6305	16123
CDS	777928	778914	987	-	A10749;CDW43_RS03745calcium/sodium antiporter;;	36	5300	4406	1972	494	507	433	277	7459	7235	1093	5073	7301	4211	4475	3280	8123
CDS	779010	779738	729	-	A10750;CDW43_RS03750VacJ family lipoprotein;;	197	32395	25666	16311	1687	1381	1257	1155	48527	42645	10224	37066	50396	27531	24802	20852	48717
CDS	779867	780913	1047	-	A10751;CDW43_RS03755glycosyltransferase family 1 protein;;	8	694	731	286	538	526	1571	3369	623	732	139	583	1071	418	272	253	727
CDS	780913	781707	795	-	A10752;CDW43_RS03760UDP-2,3-diacylglucosamine diphosphatase;;	3	1236	1136	600	1654	1641	5557	9495	1196	1520	250	570	1501	421	270	183	824
CDS	781847	783886	2040	+	A10753;CDW43_RS03765oligopeptidase A;;	131	12045	10675	5429	304	396	511	395	7995	9120	2425	12693	17301	9337	5410	5061	15282
CDS	783975	784391	417	-	A10754;CDW43_RS03770hypothetical protein;;	16	18204	12298	5025	307	217	231	242	10323	12563	2900	9286	12709	6247	3930	3436	12596
CDS	784651	784917	267	-	A10755;CDW43_RS03775DksA/TraR family C4-type zinc finger protein;;	60	2446	2244	717	307	269	274	179	1218	1959	550	4277	4853	2238	2204	1653	3881
CDS	785428	785691	264	-	A10756;CDW43_RS03785Txe/YoeB family addiction module toxin;;	6	524	510	264	39	28	30	44	787	724	169	954	1321	771	409	287	1083
CDS	785684	785938	255	-	A10757;CDW43_RS03790type II toxin-antitoxin system prevent-host-death family antitoxin;;	6	528	526	294	33	30	37	23	790	738	166	996	1332	768	370	295	1096
CDS	786575	786799	225	-	A10758;CDW43_RS03795hypothetical protein;;	43	5523	5559	682	137	223	130	81	3490	3690	4030	12764	18849	9540	3433	2747	12695
CDS	787061	788545	1485	+	A10759;CDW43_RS038004-hydroxy-3-polyprenylbenzoate decarboxylase;;	60	9351	8872	4539	258	165	246	163	6193	6937	1789	6845	9486	4416	4123	3084	7728
CDS	788534	788905	372	-	A10760;CDW43_RS03805MAPEG family protein;;	34	9084	7834	3496	155	129	215	153	2977	3444	742	3558	5774	3694	3304	2615	6787
CDS	788966	790714	1749	-	A10761;CDW43_RS03810OFA family MFS transporter;;	13	51434	25710	3255	138	109	123	200	2468	3037	493	22678	42031	23983	15029	12273	40700
CDS	790783	791031	249	-	A10762;CDW43_RS03815formate dehydrogenase subunit delta;;	16	22151	10135	1210	33	63	27	97	312	393	48	24770	32915	19732	6131	5873	24067
CDS	791043	791810	768	-	A10763;CDW43_RS03820formate dehydrogenase accessory sulfurtransferase FdhD;;	11	56704	34140	6613	237	269	113	405	1047	1227	216	66826	82884	45162	15241	14449	54262
CDS	791864	794743	2880	-	A10764;CDW43_RS03825formate dehydrogenase subunit alpha;;	36	283629	304121	91455	1727	1662	2725	2605	5385	6641	1365	306216	375846	187949	75358	68008	241179
CDS	794747	796294	1548	-	A10765;CDW43_RS03830formate dehydrogenase beta subunit;;	15	230355	254428	80795	2060	2958	5121	2352	1622	2140	270	199420	254078	124883	54813	47261	150564
CDS	796294	796785	492	-	A10766;CDW43_RS03835formate dehydrogenase subunit gamma;;	2	114587	122253	39873	1695	2924	2626	1077	1128	1224	177	89718	105260	49618	18864	16414	58075
CDS	796981	798069	1089	-	A10767;CDW43_RS03840substrate-binding domain-containing protein;;	12	8293	6979	3019	217	314	289	251	5546	5368	619	6389	8703	5043	2431	2164	7776
CDS	798126	798560	435	-	A10768;CDW43_RS03845molybdenum cofactor biosynthesis protein MoaE;;	34	10339	8834	3446	703	1009	631	350	6374	7034	1576	11750	13849	6606	3455	3198	9457
CDS	798563	798790	228	-	A10769;CDW43_RS03850MoaD/ThiS family protein;;	34	8047	6602	2324	806	1277	961	476	5358	5679	1478	11757	13737	7180	3974	3470	9397
CDS	798836	799315	480	+	A10770;CDW43_RS03855cyclic pyranopterin monophosphate synthase MoaC;;	12	10565	8315	2778	195	206	179	161	4778	4936	1507	6277	9244	4549	3548	3038	8338
CDS	799459	800784	1326	+	A10771;CDW43_RS03860porin;;	14	5716	4693	1276	29	35	69	49	3485	3524	922	3373	5488	3217	2357	2058	6543
CDS	801080	802414	1335	+	A10772;CDW43_RS03865porin;;	31	8108	7362	1692	107	91	93	69	4436	4422	1665	12173	14908	7449	3655	3719	13962
CDS	802498	803304	807	-	A10773;CDW43_RS03870substrate-binding domain-containing protein;;	76	4902	4261	1858	175	179	185	189	2437	2869	639	9779	13630	8024	3144	2723	11805
CDS	803425	804489	1065	-	A10774;CDW43_RS03875DUF2333 family protein;;	58	10604	10428	3586	283	396	441	317	5654	6679	1820	10708	14832	8047	3654	3306	12658
CDS	804753	805703	951	+	A10775;CDW43_RS03880ATP-binding cassette domain-containing protein;;	54	10360	10710	7493	305	303	644	223	7547	10585	1842	10249	18752	10693	7223	5862	16787
CDS	805700	806443	744	+	A10776;CDW43_RS03885ABC transporter permease subunit;;	69	7690	7759	5518	93	91	281	89	6627	7518	1197	5693	10948	6693	4320	3711	11085
CDS	806459	808372	1914	+	A10777;CDW43_RS03890Gldg family protein;;	27	12058	12389	7053	95	85	222	190	10318	11285	1748	9515	16788	9786	6060	5008	19051
CDS	808427	809539	1113	+	A10778;CDW43_RS03895DUF4340 domain-containing protein;;	44	5828	7343	2893	52	106	77	148	5231	5881	693	6019	10335	6632	3638	3163	13459
CDS	809601	810554	954	-	A10779;CDW43_RS03900chemotaxis protein CheV;;	126	12353	11017	3733	287	310	456	474	5997	5251	2827	7201	8885	4406	4116	3399	6944
CDS	810682	811386	705	+	A10780;CDW43_RS03905flagellar basal body P-ring formation chaperone FlgA;;	28	7021	6532	2281	74	57	99	49	7361	17687	1119	1401	2037	925	2050	1597	1602
CDS	811473	811787	315	+	A10781;CDW43_RS03910flagellar biosynthesis anti-sigma factor FlgM;;	59	28117	19018	6684	510	569	518	320	12131	11329	3855	3375	3909	1857	4925	3828	2972
CDS	811803	812291	489	+	A10782;CDW43_RS03915flagellar protein FlgN;;	108	32804	25499	8920	309	323	304	206	19423	27307	4031	4049	4877	2694	4940	4649	3947
CDS	812322	813335	1014	-	A10783;CDW43_RS03920ferrochelatase;;	83	16442	14761	5675	286	319	482	347	11881	17062	2179	11535	14354	7111	4870	4086	9825
CDS	813344	814258	915	-	A10784;CDW43_RS03925TIGR01777 family oxidoreductase;;	36	5281	4858	1875	316	446	456	360	2142	3086	620	4486	4591	1969	999	769	2522
CDS	814370	815314	945	+	A10785;CDW43_RS03930DUF523 and DUF1722 domain-containing protein;;	11	3227	2664	1615	209	194	169	160	1518	2281	357	3067	3217	1555	758	585	2163
CDS	815493	816482	990	+	A10786;CDW43_RS03935histone deacetylase;;	8	3242	3186	1214	107	80	95	85	1347	2051	468	2227	2523	1277	841	664	1910
CDS	816588	817478	891	+	A10787;CDW43_RS03940crotonase/enoyl-CoA hydratase family protein;;	45	8950	9067	2962	118	48	104	51	7368	20950	1182	1723	2688	1595	4583	4385	2454
CDS	817684	820260	2577	-	A10788;CDW43_RS03945ATP-binding protein;;	96	23415	20652	8677	330	331	434	361	14255	15639	2163	12285	20108	12670	7680	6423	23291
CDS	820250	821365	1116	-	A10789;CDW43_RS03950response regulator;;	49	24489	17788	8530	431	411	467	407	11344	10762	2939	14450	18794	10235	4707	4545	16461
CDS	821649	822017	369	+	A10790;CDW43_RS03955CbiX/SirB N-terminal domain-containing protein;;	2	1350	995	604	58	87	53	19	1069	1192	224	1772	2109	1003	724	527	1890
CDS	822068	822286	219	-	A10791;CDW43_RS03960hypothetical protein;;	3	1190	1254	986	78	85	122	39	884	1046	127	924	1376	674	509	350	1391
CDS	822475	822546	72	-	A10792;CDW43_RS16805pyrroloquinoline quinone precursor peptide PqqA;;	4	1637	1239	495	216	336	455	239	1133	1233	315	2739	3726	1931	1687	981	2941
riboswitch	822774	822851	78	.	Ribo02;riboswitch c-di-GMP;;	421	26722	16074	44681	1400	985	629	2265	2362	1704	989	2981	3755	1994	1810	1407	3344
CDS	822870	823415	546	+	A10793;CDW43_RS03970hypothetical protein;;	1969	113444	67985	189009	7148	5001	2371	12536	7742	4817	3945	8594	10924	5483	7641	5480	9425
CDS	823521	825194	1674	-	A10794;CDW43_RS03975dihydroxy-acid dehydratase;;	105	7709	4841	3096	187	107	179	264	4026	3950	1779	12082	17818	9582	5131	3863	14818
CDS	825595	826602	1008	+	A10795;CDW43_RS03980fatty acid desaturase;;	40	4889	3992	1428	114	146	134	60	3049	3490	811	14787	21745	11344	3516	2754	14368
CDS	827267	827443	177	+	A10797;CDW43_RS03990AlpA family phage regulatory protein;;	0	472	217	9	2	6	3	2	600	667	59	262	273	211	100	80	297
CDS	827440	827919	480	+	A10798;CDW43_RS03995hypothetical protein;;	0	1401	707	33	13	13	18	1	1447	1679	237	1056	1159	714	347	332	1162
CDS	828111	829100	990	-	A10799;CDW43_RS04000WYL domain-containing protein;;	0	2911	1313	68	39	17	19	7	3340	3625	645	1938	2193	1257	614	579	1812
CDS	829459	830727	1269	+	A10800;CDW43_RS04005hypothetical protein;;	0	3384	2048	47	14	5	20	0	3284	3198	1140	6662	7591	3672	1401	1216	4955
CDS	830720	831238	519	+	A10801;CDW43_RS04010hypothetical protein;;	0	1543	738	26	14	8	20	8	1204	1257	273	3113	4189	2507	1009	776	3284
CDS	831451	833199	1749	+	A10802;CDW43_RS04015type I restriction-modification system subunit M;;	0	8248	3916	125	52	18	81	14	9681	8914	1701	12640	19265	11383	4108	3789	18894
CDS	833189	833440	252	+	A10803;CDW43_RS04020restriction endonuclease subunit S;;	0	3163	1475	231	25	24	27	2	3230	3006	573	2506	3430	1879	645	532	3758
CDS	833524	834408	885	+	A10804;CDW43_RS04025IS982 family transposase;;	18	4864	6512	3325	85	86	166	109	2507	2608	568	3405	4667	2392	1411	1225	3918
Pseudo	834433	834669	237	+	A10805;CDW43_RS16810restriction endonuclease subunit S;partial;pseudo	0	857	483	23	3	10	22	0	651	683	124	956	1295	748	367	297	1454
CDS	834919	835395	477	+	A10806;CDW43_RS16815restriction endonuclease subunit S;;	0	883	520	21	4	11	22	4	816	1013	147	728	1076	626	291	203	1092
CDS	835423	838536	3114	+	A10807;CDW43_RS04035type I restriction endonuclease subunit R;;	0	3977	2134	67	24	14	40	10	3354	3610	652	2589	3778	2191	1224	1052	4298
CDS	838536	839252	717	+	A10808;CDW43_RS04040SprT family zinc-dependent metalloprotease;;	0	4628	2433	51	32	13	22	0	6514	7293	1272	6195	7599	4101	2599	2320	6379
CDS	839525	840733	1209	-	A10809;CDW43_RS04045IS256 family transposase;;	108	8229	8568	3614	85	69	133	35	7539	7978	1810	12672	16337	8820	4160	3562	13800
CDS	840789	841409	621	-	A10810;CDW43_RS04050hypothetical protein;;	1	6134	2997	295	18	24	40	9	5039	5500	759	5679	8158	4908	1648	1590	7302
CDS	841409	843070	1662	-	A10811;CDW43_RS04055RNA-directed DNA polymerase;;	0	23862	10726	407	227	144	269	39	19643	21642	4532	30164	35416	19755	7709	6750	27937
CDS	843372	843980	609	+	A10812;CDW43_RS04060recombinase family protein;;	0	8562	9258	112	207	75	611	24	3928	8837	6316	7924	6248	2379	1658	1300	2553
CDS	843996	844214	219	+	A10813;CDW43_RS04065hypothetical protein;;	0	4633	3594	55	51	21	128	7	2819	4687	1502	6853	6049	2688	1094	1023	2712
CDS	844312	845232	921	-	A10814;CDW43_RS04070hypothetical protein;;	0	9332	4726	106	61	30	65	12	10798	12017	1527	8050	11140	7064	3628	3163	12075
CDS	845229	847208	1980	-	A10815;CDW43_RS04075hypothetical protein;;	0	10288	3534	180	94	42	104	22	11850	10194	1543	9789	15396	10514	4930	4814	20783
CDS	847205	848107	903	-	A10816;CDW43_RS04080hypothetical protein;;	0	5898	2029	78	62	38	60	6	5348	4879	938	5282	7173	4499	2641	2326	7986
CDS	848085	849260	1176	-	A10817;CDW43_RS04085N-6 DNA methylase;;	0	16967	6166	269	198	137	273	50	10813	10763	2250	14059	17608	9696	4925	4024	15301
CDS	849561	849815	255	+	A10818;CDW43_RS04090hypothetical protein;;	0	2878	1250	55	32	25	34	24	2121	2128	578	2526	2895	1552	631	569	2661
CDS	849858	850229	372	+	A10819;CDW43_RS04095hypothetical protein;;	0	3146	1188	42	35	17	49	10	2690	2810	686	3108	3983	2255	980	826	3396
CDS	850387	850962	576	-	A10820;CDW43_RS04100hypothetical protein;;	0	4623	1418	75	10	20	25	0	3839	3920	1356	5369	7522	4234	1659	1387	7022
CDS	851060	851302	243	-	A10821;CDW43_RS04105hypothetical protein;;	0	2454	772	54	23	31	39	11	1552	1885	663	4197	5792	3234	1868	1441	5252
CDS	851794	853308	1515	+	A10822;CDW43_RS04110IS21 family transposase;;	41	5577	4360	400	100	79	91	68	2515	3382	914	4193	5543	2613	2430	1815	4030
CDS	853320	854066	747	+	A10823;CDW43_RS04115IS21-like element helper ATPase IstB;;	7	1502	1014	191	26	20	32	21	1879	2281	331	1274	1915	915	1064	782	1652
CDS	854523	855731	1209	-	A10824;CDW43_RS04120IS256 family transposase;;	84	8952	9245	3668	103	94	121	27	7793	8076	1809	12490	16119	8880	4083	3469	13615
CDS	855854	857095	1242	-	A10825;CDW43_RS04125site-specific integrase;;	0	3465	1589	40	24	28	30	6	3028	2929	400	2277	3025	1678	899	659	3121
CDS	858111	858995	885	-	A10826;CDW43_RS04135IS982 family transposase;;	18	5476	7987	3536	98	141	188	141	2632	2761	680	4845	6283	3329	1744	1487	4707
CDS	859476	860222	747	+	A10827;CDW43_RS04145helix-turn-helix transcriptional regulator;;	7	11721	4209	396	219	167	202	105	7699	8515	1967	14285	17911	9996	3280	3469	15459
CDS	860206	861063	858	+	A10828;CDW43_RS04150serine/threonine-protein kinase;;	7	8355	3192	270	58	44	51	26	7266	7679	1204	6710	9314	5076	2034	1827	8951
CDS	861066	862256	1191	+	A10829;CDW43_RS04155hypothetical protein;;	17	14953	5664	484	173	49	139	47	16597	15378	2926	16433	23075	12366	6060	5264	21407
CDS	862267	862995	729	-	A10830;CDW43_RS04160protein phosphatase 2C domain-containing protein;;	8	5833	2106	248	92	59	96	37	7361	6857	898	4987	6922	3792	1462	1528	6459
CDS	863118	863489	372	+	A10831;CDW43_RS04165hypothetical protein;;	12	6163	2018	178	204	150	102	80	5573	5412	900	7016	8454	4444	2664	2059	7482
CDS	863616	864245	630	-	A10832;CDW43_RS04170hypothetical protein;;	7	5600	2118	277	79	66	60	48	4658	4772	673	3645	4512	2537	1244	1125	5139
CDS	864340	865086	747	-	A10833;CDW43_RS04175IS21-like element helper ATPase IstB;;	7	1563	1096	165	28	19	43	15	1944	2337	332	1222	1840	967	1013	780	1672
CDS	865098	866612	1515	-	A10834;CDW43_RS04180IS21 family transposase;;	37	6116	4898	471	111	90	106	64	2628	3615	949	4434	5621	2786	2560	1831	4141
CDS	866844	867728	885	-	A10835;CDW43_RS04185competence protein CoiA family protein;;	15	4421	2577	189	45	57	52	37	3571	3812	1024	4750	5470	3022	956	930	4274
CDS	867840	868331	492	-	A10836;CDW43_RS04190GNAT family N-acetyltransferase;;	34	3826	5360	1491	58	81	82	80	2220	2400	1560	5037	6338	3324	901	804	3810
CDS	868322	868597	276	-	A10837;CDW43_RS04195DUF1778 domain-containing protein;;	37	4003	4704	1230	77	87	101	72	1844	2105	1672	6600	7936	4408	1173	1044	4282
CDS	869303	869626	324	-	A10838;CDW43_RS04200DUF2149 domain-containing protein;;	226	10012	6363	699	46	66	52	62	2045	1952	293	1695	2107	1115	566	465	1774
CDS	869623	870141	519	-	A10839;CDW43_RS04205MotA/TolQ/ExbB proton channel family protein;;	843	10786	7096	382	19	6	7	19	982	1083	248	658	994	548	422	337	1069
CDS	870143	874030	3888	-	A10840;CDW43_RS04210cobaltochelatase subunit CobN;;	3935	40682	37520	2149	214	238	250	211	3392	4135	2033	5990	6490	3186	2271	1622	4791
CDS	874085	876007	1923	-	A10841;CDW43_RS04215TonB-dependent receptor;;	2987	39021	52138	1929	65	64	123	59	3376	3346	17300	2727	3936	2181	1371	1138	3120
CDS	876707	877330	624	-	A10842;CDW43_RS04220DUF502 domain-containing protein;;	42	7469	6824	2171	130	112	216	136	5493	6994	1116	9932	11666	6011	3148	2515	7998
CDS	877365	877829	465	-	A10843;CDW43_RS04225DsrE/DsrF/DrsH-like family protein;;	55	8930	7937	2605	223	227	326	255	5298	7422	1996	18160	19349	8979	3780	3504	11150
CDS	877834	878067	234	-	A10844;CDW43_RS04230sulfurtransferase TusA family protein;;	30	6180	5624	2019	162	197	205	160	4150	5943	1427	9970	10106	4561	2093	1709	5955
CDS	878164	879612	1449	+	A10845;CDW43_RS04235M48 family metalloprotease;;	104	24183	24707	8327	700	605	870	625	8514	10786	2357	19318	22541	9935	4371	3520	12566
CDS	879609	880097	489	+	A10846;CDW43_RS04240thiosulfate oxidation carrier protein SoxY;;	53	5576	5614	2489	143	166	286	212	3751	4115	778	11989	13022	5897	2310	2066	8736
CDS	880097	880414	318	+	A10847;CDW43_RS04245thiosulfate oxidation carrier complex protein SoxZ;;	28	4240	4204	1901	120	105	177	163	2583	3267	546	7955	9345	4283	2559	1908	6004
CDS	880411	882126	1716	+	A10848;CDW43_RS04250histidine kinase;;	74	17123	16502	7301	260	164	385	369	10409	11756	1486	17835	23728	11832	6460	4871	17482
CDS	882116	882760	645	+	A10849;CDW43_RS04255response regulator;;	43	6925	6287	2682	117	83	120	96	4746	5376	853	8418	11239	5734	3930	2835	9308
CDS	882951	884312	1362	+	A10850;CDW43_RS04260histidine kinase;;	33	7531	7562	3584	147	192	211	221	6312	6386	934	4319	6151	3781	2175	1891	6797
CDS	884302	884946	645	+	A10851;CDW43_RS04265response regulator transcription factor;;	10	4776	4328	1599	63	44	89	103	3065	3068	485	2523	3730	2105	1567	1399	4396
CDS	885134	886912	1779	+	A10852;CDW43_RS04270methanol/ethanol family PQQ-dependent dehydrogenase;;	481	28813	36416	13477	6991	8301	7722	6059	16880	39180	8872	18048	29715	16131	17518	14133	31345
CDS	887201	887272	72	+	A10853;CDW43_RS04275pyrroloquinoline quinone precursor peptide PqqA;;	10	709	1175	484	48	123	210	51	743	1004	230	5395	10501	6164	6668	3946	7810
CDS	887412	888326	915	+	A10854;CDW43_RS04280pyrroloquinoline quinone biosynthesis protein PqqB;;	43	3030	5178	2140	83	156	324	107	2445	3197	988	11789	19617	11293	3887	3512	14858
CDS	888349	889077	729	+	A10855;CDW43_RS04285pyrroloquinoline-quinone synthase PqqC;;	44	5325	7993	1906	82	131	221	118	2264	2413	821	13201	19398	9710	3429	3051	13731
CDS	889074	889358	285	+	A10856;CDW43_RS04290pyrroloquinoline quinone biosynthesis peptide chaperone PqqD;;	39	3463	4460	1091	70	48	94	82	1432	1601	495	7591	11178	5355	1994	1707	7162
CDS	889330	890523	1194	+	A10857;CDW43_RS04295pyrroloquinoline quinone biosynthesis protein PqqE;;	105	11980	14675	3608	232	235	320	206	5677	6640	1871	19965	28811	13135	6977	5512	18792
CDS	890836	891774	939	+	A10858;CDW43_RS04300ATP-binding cassette domain-containing protein;;	54	4095	4391	1611	102	104	141	139	3184	3396	580	4678	7609	4186	2561	2020	6561
CDS	891771	892556	786	+	A10859;CDW43_RS04305ABC transporter permease;;	24	2426	2453	764	53	61	61	74	1502	1521	307	3067	4690	2669	1462	1233	4226
CDS	892742	893401	660	+	A10860;CDW43_RS04310protein-L-isoaspartate O-methyltransferase;;	23	8172	6532	5132	166	175	328	165	3990	4166	1016	5176	7702	4440	2755	2489	8534
CDS	893417	893743	327	+	A10861;CDW43_RS04315rhodanese-like domain-containing protein;;	18	4156	3295	2779	68	77	146	51	2087	2157	514	2146	3384	1767	1104	1054	3467
CDS	893753	895069	1317	+	A10862;CDW43_RS04320TolC family outer membrane protein;;	146	59321	38496	20356	973	779	1238	691	25455	27047	7125	24592	33763	16330	9277	7125	26468
CDS	895091	895642	552	+	A10863;CDW43_RS04325hydrolase;;	49	8429	7663	3605	152	173	226	179	7161	7092	1027	7187	11483	6954	3260	2905	12050
CDS	895639	895839	201	-	A10864;CDW43_RS04330DUF1289 domain-containing protein;;	9	2071	2236	895	36	37	34	19	2588	2283	272	1169	2141	1370	722	730	2609
CDS	896215	897726	1512	-	A10865;CDW43_RS04335B12-binding domain-containing radical SAM protein;;	36	8818	9198	3030	190	184	284	272	9017	8341	947	4893	7318	4225	3012	2724	8014
CDS	897763	899205	1443	-	A10866;CDW43_RS04340exodeoxyribonuclease I;;	71	17198	19215	4731	247	123	242	278	11291	13584	2272	15239	22541	12044	6997	5742	19657
CDS	899206	900492	1287	-	A10867;CDW43_RS04345glutamate-1-semialdehyde 2,1-aminomutase;;	168	22585	25113	5697	493	426	531	493	10714	13180	3144	25510	33496	16689	8715	7550	22881
CDS	900639	901976	1338	+	A10868;CDW43_RS04350LapD/MoxY N-terminal periplasmic domain-containing protein;;	100	14405	14684	4693	482	546	604	609	9761	10069	1808	12648	16108	7685	4120	3425	11668
CDS	901973	902608	636	+	A10869;CDW43_RS04355response regulator transcription factor;;	69	8645	9244	3064	216	173	302	304	5953	6960	1505	10473	14262	7537	4014	3415	11482
CDS	902942	903709	768	+	A10870;CDW43_RS04360DUF3450 domain-containing protein;;	229	14968	18140	4725	224	208	432	286	10827	8761	3541	7677	13053	7294	3926	3844	13855
CDS	903706	905067	1362	+	A10871;CDW43_RS04365MotA/TolQ/ExbB proton channel family protein;;	392	22573	24100	6123	178	168	547	321	17382	14248	4132	14128	25447	14252	10077	9249	27299
CDS	905060	905572	513	+	A10872;CDW43_RS04370MotA/TolQ/ExbB proton channel family protein;;	161	7565	7682	1613	50	38	109	69	5912	4932	900	4343	7937	4331	3776	3105	8580
CDS	905581	905988	408	+	A10873;CDW43_RS04375biopolymer transporter ExbD;;	103	5443	6001	1338	33	42	113	118	4763	4136	647	4301	8237	4638	2849	2423	8721
CDS	905960	906667	708	+	A10874;CDW43_RS04380energy transducer TonB;;	91	6936	8899	1726	20	20	63	98	7764	6631	950	4371	8379	4472	3374	2986	9208
CDS	906670	907893	1224	+	A10875;CDW43_RS04385tetratricopeptide repeat protein;;	214	10312	12665	2534	44	68	98	181	12154	10396	1557	10565	20782	13491	8567	7831	27174
CDS	907886	908452	567	+	A10876;CDW43_RS04390class II aldolase/adducin family protein;;	67	3257	4204	824	114	92	437	718	3780	3144	407	2924	5771	3546	2901	2392	6710
CDS	908796	910943	2148	+	A10877;CDW43_RS043955-histidylcysteine sulfoxide synthase;;	162	28009	26143	10635	567	570	1257	819	11632	12888	2336	37828	52084	28396	11132	9609	41869
CDS	910930	912102	1173	+	A10878;CDW43_RS04400PatB family C-S lyase;;	82	10193	9389	3678	197	134	243	291	5063	5288	958	10949	16104	8567	4593	3772	13062
CDS	912194	912397	204	+	A10879;CDW43_RS04405winged helix-turn-helix domain-containing protein;;	23	6923	6531	2389	94	82	168	96	2995	3392	836	7056	8754	4015	2095	1733	5820
CDS	912394	912966	573	-	A10880;CDW43_RS04410DUF3365 domain-containing protein;;	41	11292	11997	4121	176	154	264	178	5929	6660	2194	12220	14756	7128	3433	2888	9308
CDS	913275	915173	1899	+	A10881;CDW43_RS04415DNA topoisomerase IV subunit B;;	90	14143	13628	5178	359	291	390	382	9164	8976	2078	9903	18041	10379	11658	9353	21416
CDS	915188	917428	2241	+	A10882;CDW43_RS04420DNA topoisomerase IV subunit A;;	165	14937	13977	4579	164	123	239	268	8935	7939	1904	13016	24127	14444	12442	10462	29762
CDS	917482	917943	462	+	A10883;CDW43_RS04425DUF3305 domain-containing protein;;	31	5764	5122	1556	93	136	108	102	3489	3552	593	3723	5531	3368	1959	1542	5699
CDS	917940	918404	465	+	A10884;CDW43_RS04430DUF3306 domain-containing protein;;	18	4782	5072	1539	128	113	128	78	4233	4247	503	3469	4722	2571	1305	1073	4525
CDS	918406	919941	1536	+	A10885;CDW43_RS044354Fe-4S binding protein;;	41	6815	7776	1922	127	107	217	245	6340	6361	725	7134	10650	5896	3217	2728	9072
CDS	919947	920522	576	+	A10886;CDW43_RS04440molecular chaperone TorD family protein;;	16	3062	3361	848	57	64	96	111	2979	3072	362	3397	4822	2716	1544	1215	3717
CDS	920655	920864	210	+	A10887;CDW43_RS04445hypothetical protein;;	92	11184	10625	3962	749	772	821	669	4966	6177	1249	17834	21204	10025	6257	5146	14761
CDS	920877	923750	2874	+	A10888;CDW43_RS04450formate dehydrogenase subunit alpha;;	776	92930	81083	30480	2399	1999	2817	3605	35912	44230	7878	120758	151453	74142	40542	34536	114000
CDS	923767	924351	585	+	A10889;CDW43_RS04455formate dehydrogenase FDH3 subunit beta;;	139	18412	15378	5762	280	209	255	695	8406	8407	1115	28418	35228	16920	7794	6774	26182
CDS	924354	924533	180	+	A10890;CDW43_RS04460hypothetical protein;;	36	5128	4341	1743	111	100	85	224	2616	2769	377	8746	11810	6028	2627	2192	8723
CDS	924544	925551	1008	+	A10891;CDW43_RS04465formate dehydrogenase subunit gamma;;	115	19761	18527	6803	258	175	127	420	8362	8664	1019	16726	23412	11337	5800	4761	18435
CDS	925876	927573	1698	+	A10892;CDW43_RS04470NAD(P)H-dependent oxidoreductase subunit E;;	230	39793	36917	16093	807	718	1135	834	26778	24472	5525	30391	56117	33436	21686	19355	66104
CDS	927573	930374	2802	+	A10893;CDW43_RS04475formate dehydrogenase subunit alpha;;	771	69215	70229	19894	885	685	1168	1338	46480	42355	8662	70041	110461	63784	46745	40718	121574
CDS	930538	931290	753	+	A10894;CDW43_RS044805'/3'-nucleotidase SurE;;	116	10613	9758	4286	493	435	658	810	9140	8110	2419	6107	9851	5677	7436	5905	13536
CDS	931287	931949	663	+	A10895;CDW43_RS04485protein-L-isoaspartate(D-aspartate) O-methyltransferase;;	96	8214	7360	2908	239	223	458	748	5773	5205	1272	4913	8652	5159	5734	4488	10227
CDS	931946	932521	576	+	A10896;CDW43_RS04490YqaA family protein;;	95	7611	7744	2319	240	227	386	444	4859	4711	890	7210	11966	7188	7489	5314	13650
CDS	932524	933354	831	+	A10897;CDW43_RS04495peptidoglycan DD-metalloendopeptidase family protein;;	84	5500	7003	2036	179	137	185	238	4273	4097	596	5200	8687	5484	4990	3659	10859
CDS	933442	934519	1078	+	A10898;CDW43_RS04500peptide chain release factor 2;ribosomal_slippage;	54	14413	13885	8199	146	114	248	128	11990	10979	2166	7548	12574	7379	5751	5040	13690
CDS	934531	936030	1500	+	A10899;CDW43_RS04505lysine--tRNA ligase;;	73	12706	9488	3906	126	73	200	111	12648	9991	1608	12938	21452	13330	7914	7953	24577
CDS	936040	936552	513	-	A10900;CDW43_RS16650tyrosine-type recombinase/integrase;;	24	8238	6125	1342	108	135	131	73	5566	5383	1095	9330	12673	7087	4735	3739	11326
CDS	936560	937006	447	-	A10901;CDW43_RS16655phage integrase N-terminal SAM-like domain-containing protein;;	19	8661	5069	882	130	129	132	49	5826	5377	1309	8186	10240	5424	2473	2061	8227
CDS	937269	937841	573	+	A10902;CDW43_RS04515hypothetical protein;;	35	17585	6874	2187	197	179	209	141	8367	7499	2998	37324	42713	20701	7615	6949	27256
CDS	937994	938356	363	+	A10903;CDW43_RS04520cupin domain-containing protein;;	0	9568	2997	151	71	53	99	14	5278	4641	1699	17725	22907	12770	6326	5391	12669
CDS	938371	939039	669	+	A10904;CDW43_RS04525hypothetical protein;;	0	6988	2131	112	20	61	72	15	4929	3992	1170	15928	20902	11954	3480	3569	14857
CDS	939373	939783	411	+	A10905;CDW43_RS16485hypothetical protein;;	0	2595	917	35	25	16	32	8	1891	1532	379	4972	7409	3721	2957	2361	6621
CDS	939910	941448	1539	+	A10906;CDW43_RS04540RNA-directed DNA polymerase;;	0	7938	2912	103	45	35	74	13	6226	6640	1309	8729	13254	7924	3566	3004	14111
CDS	941525	942445	921	+	A10907;CDW43_RS04545gamma-glutamylcyclotransferase;;	4	7564	3103	84	73	37	66	21	6213	5616	1429	9579	15563	8214	6437	4971	17847
CDS	943053	943358	306	+	A10908;CDW43_RS04550hypothetical protein;;	113	6105	5176	3319	397	369	277	281	1968	2390	938	7514	7414	3783	2397	1789	4809
CDS	943548	944300	753	+	A10909;CDW43_RS04555hypothetical protein;;	126	9545	8141	5084	334	327	334	404	4495	4719	965	8128	7766	3795	1501	1370	5038
CDS	944533	944685	153	+	A10910;CDW43_RS16250hypothetical protein;;	6	1846	1688	937	78	72	112	125	1047	1158	140	1687	2147	1023	682	589	1477
CDS	944808	945719	912	+	A10911;CDW43_RS04560hypothetical protein;;	13	6348	7282	2856	110	115	172	99	3959	4135	680	3514	4772	2386	1377	1167	4069
CDS	945803	946348	546	+	A10912;CDW43_RS04565hypothetical protein;;	26	1570	2798	1642	91	119	126	123	574	581	80	1088	1802	886	516	370	1704
CDS	946483	946926	444	+	A10913;CDW43_RS04570DUF695 domain-containing protein;;	0	686	283	21	12	8	18	2	669	704	185	525	770	333	310	182	713
CDS	947053	947286	234	+	A10914;CDW43_RS04575hypothetical protein;;	13	2200	2047	1070	125	127	62	51	1738	1724	474	1813	2233	1051	829	625	1677
CDS	947273	947539	267	+	A10915;CDW43_RS04580type II toxin-antitoxin system RelE/ParE family toxin;;	10	2238	1944	1153	169	175	97	75	1639	1612	449	3351	4004	2143	1096	1077	3422
CDS	947576	947791	216	+	A10916;CDW43_RS04585TIGR02450 family Trp-rich protein;;	4	945	867	500	67	69	53	21	555	614	132	1568	1846	987	441	477	1866
CDS	947856	948194	339	+	A10917;CDW43_RS04590thioredoxin family protein;;	3	902	826	435	23	28	39	19	441	693	124	881	1247	537	512	426	1219
CDS	948417	948641	225	+	A10918;CDW43_RS04595type II toxin-antitoxin system RelE/ParE family toxin;;	29	6186	8620	2166	856	382	578	342	4256	6056	1459	7362	8419	3555	2324	2006	4596
CDS	948631	948921	291	+	A10919;CDW43_RS04600NadS family protein;;	74	6491	9661	2552	494	250	381	336	5164	7082	1577	10382	12578	5818	3253	2885	7404
CDS	948963	949808	846	-	A10920;CDW43_RS04605DNA ligase;;	55	3865	5536	1845	175	144	192	178	4385	5234	1037	4723	5857	3252	2069	1805	4490
CDS	950211	950549	339	+	A10921;CDW43_RS04610thioredoxin family protein;;	14	1243	1299	493	53	40	45	31	623	768	308	1054	1253	571	374	401	842
CDS	950611	950865	255	-	A10922;CDW43_RS04615Txe/YoeB family addiction module toxin;;	17	3255	3330	1061	122	97	95	56	1734	2052	1557	2363	2592	1166	800	755	1784
CDS	950862	951113	252	-	A10923;CDW43_RS04620type II toxin-antitoxin system prevent-host-death family antitoxin;;	13	2208	2261	815	98	71	74	57	1248	1438	1241	2071	2268	1066	499	562	1503
CDS	951521	953368	1848	+	A10924;CDW43_RS04625lytic transglycosylase domain-containing protein;;	105	6247	7459	3551	371	306	360	321	5172	5988	1467	9640	11974	6337	4813	4070	9801
CDS	953610	954740	1131	-	A10925;CDW43_RS04630PepSY-associated TM helix domain-containing protein;;	33	1604	1782	724	51	46	53	21	1041	1200	251	1194	1611	847	689	564	1684
CDS	954740	956812	2073	-	A10926;CDW43_RS04635TonB-dependent receptor;;	47	2304	2918	917	45	48	100	68	1450	1574	606	1288	1591	927	645	441	1658
CDS	956979	957854	876	+	A10927;CDW43_RS04640helix-turn-helix domain-containing protein;;	186	3194	4157	266	24	18	43	49	375	444	1145	763	966	572	512	379	880
Pseudo	958033	958865	833	+	A10928;CDW43_RS04645IS5 family transposase;pseudo;	118	6824	8029	1926	362	356	320	238	1743	2051	1100	5613	6575	3075	3037	2097	4808
CDS	958983	959384	402	+	A10929;CDW43_RS04650GFA family protein;;	4	3251	4138	998	47	54	111	52	1343	1425	522	2470	3538	2112	1011	856	3335
CDS	959484	960035	552	+	A10930;CDW43_RS04655hypothetical protein;;	12	3668	4575	1134	91	71	90	50	1937	1948	560	2629	4126	2431	1066	963	4117
CDS	960062	960706	645	+	A10931;CDW43_RS04660class I SAM-dependent methyltransferase;;	18	2719	3240	916	72	89	103	38	1368	1504	427	2634	3752	2191	1443	1201	3345
CDS	960823	961095	273	+	A10932;CDW43_RS04665ribbon-helix-helix protein, CopG family;;	10	2501	2810	996	72	37	75	39	1299	1582	628	2997	3682	1779	1256	1026	2594
CDS	961092	961373	282	+	A10933;CDW43_RS04670type II toxin-antitoxin system RelE/ParE family toxin;;	11	3824	4156	1596	124	70	112	87	2683	2915	850	4815	5809	3029	1664	1547	4382
CDS	961702	962040	339	-	A10934;CDW43_RS04680DUF3144 domain-containing protein;;	8	5470	4815	1883	150	151	172	96	4532	4128	799	3287	4957	3139	1530	1403	6170
CDS	962143	962484	342	+	A10935;CDW43_RS04685hypothetical protein;;	11	2463	2550	846	71	96	105	49	1290	1473	314	1261	1537	853	454	389	1538
CDS	962527	964971	2445	-	A10936;CDW43_RS04690spermidine synthase;;	50	5473	6697	2022	146	134	216	159	2660	3271	658	4045	5350	2913	1798	1408	4008
CDS	964971	965726	756	-	A10937;CDW43_RS04695protein-L-isoaspartate(D-aspartate) O-methyltransferase;;	20	2239	2478	958	115	111	97	105	1365	1428	421	1265	1689	875	556	516	1267
CDS	966101	966973	873	+	A10938;CDW43_RS04700PA4780 family RIO1-like protein kinase;;	46	6867	6740	2718	314	321	295	180	4763	4732	1062	10769	12569	6519	2834	2601	10373
CDS	967260	968237	978	-	A10939;CDW43_RS04705endonuclease/exonuclease/phosphatase family protein;;	28	7487	7565	2936	111	160	126	85	5626	5297	826	3844	5904	3533	1825	1548	6767
CDS	968438	968566	129	+	A10940;CDW43_RS16820hypothetical protein;;	3	1560	1533	803	15	17	27	15	874	983	160	968	1148	677	204	181	939
CDS	968958	970853	1896	+	A10941;CDW43_RS04710DUF294 nucleotidyltransferase-like domain-containing protein;;	168	24835	34100	13732	596	620	751	657	14276	14114	3126	23165	32042	17158	11616	9775	27863
CDS	970857	971579	723	+	A10942;CDW43_RS047153'-5' exonuclease;;	54	8693	11708	4214	133	114	137	123	7274	6400	973	5138	8315	4652	3765	3126	8976
CDS	971590	973242	1653	-	A10943;CDW43_RS04720BCCT family transporter;;	131	10916	15205	3252	137	131	180	206	8878	7803	1484	8529	15236	9180	5923	4956	16372
CDS	973340	974620	1281	-	A10944;CDW43_RS04725hypothetical protein;;	40	16791	15914	2434	192	257	224	214	6758	7636	2291	20141	29404	15254	6327	5281	22413
CDS	975160	975573	414	+	A10945;CDW43_RS04730universal stress protein;;	38	3419	3485	794	89	96	124	115	1404	1670	883	3195	4197	2114	1393	1107	3139
CDS	975737	975898	162	-	A10946;CDW43_RS16255hypothetical protein;;	4	778	855	259	8	22	22	26	422	432	98	817	1107	607	197	252	1067
CDS	976096	977010	915	-	A10947;CDW43_RS04735squalene synthase HpnC;;	45	12691	14027	4066	502	650	451	359	5547	5978	1480	11387	14328	7415	3581	3166	11470
CDS	977000	978286	1287	-	A10948;CDW43_RS04740DNA recombination protein RmuC;;	28	5870	6255	2001	49	75	89	107	4982	3968	616	5405	8374	4757	2318	2084	7546
CDS	978277	978936	660	-	A10949;CDW43_RS04745HAD-IA family hydrolase;;	29	4806	4354	1310	54	55	82	77	3490	3146	629	5680	7948	4569	2336	2050	6503
CDS	978936	979637	702	-	A10950;CDW43_RS04750bifunctional 2-polyprenyl-6-hydroxyphenol methylase/3-demethylubiquinol 3-O-methyltransferase UbiG;;	36	5401	5817	1617	122	103	143	106	4397	3932	959	7149	9397	4959	3060	2725	7625
CDS	979634	980953	1320	-	A10951;CDW43_RS04755TRZ/ATZ family hydrolase;;	54	6802	6204	2310	275	276	318	203	6486	6573	1307	7523	10174	5332	4331	3235	8077
CDS	981009	982043	1035	+	A10952;CDW43_RS04760S-methyl-5-thioribose-1-phosphate isomerase;;	42	8042	8015	3432	160	170	374	247	5076	5234	1336	7312	10279	5240	2581	2287	8296
CDS	982054	982728	675	+	A10953;CDW43_RS04765SDR family oxidoreductase;;	82	9187	10802	3429	171	171	386	359	5297	6130	1743	12292	15921	7937	4191	3753	10756
CDS	982722	983615	894	+	A10954;CDW43_RS04770phosphotransferase;;	63	8784	10188	2633	112	100	189	197	6745	7144	973	8913	12156	6992	3601	3365	10374
CDS	983612	984235	624	-	A10955;CDW43_RS04775nicotinamide riboside transporter PnuC;;	42	7449	8925	1897	54	62	142	74	6222	6327	671	3995	6276	3837	3195	2607	6411
CDS	984235	984492	258	-	A10956;CDW43_RS04780YkoF family thiamine/hydroxymethylpyrimidine-binding protein;;	5	4103	4068	1071	32	37	90	21	3049	3016	358	2205	3545	2253	1342	1231	4004
CDS	984514	986580	2067	-	A10957;CDW43_RS04785TonB-dependent receptor;;	29	29229	27625	8723	222	215	494	288	17917	20218	3358	14550	23970	14455	7841	7825	24459
riboswitch	986642	986747	106	.	Ribo03;riboswitch c-di-GMP;;	13	1881	1870	520	45	48	118	60	918	981	215	677	1211	700	579	472	1230
CDS	986859	987428	570	-	A10958;CDW43_RS04790SRPBCC family protein;;	43	8669	9680	3658	128	111	142	187	6153	5514	1916	8058	11470	5969	3446	3032	13054
CDS	987516	988436	921	-	A10959;CDW43_RS04795HTH-type transcriptional regulator CysB;;	26	3246	4039	1656	42	85	93	62	2710	3004	1014	9100	9592	3922	1718	1556	4584
CDS	988518	988868	351	-	A10960;CDW43_RS04800hypothetical protein;;	1	1677	1727	743	59	35	60	26	1610	1587	443	4915	4512	1878	773	575	2513
CDS	989122	989922	801	+	A10961;CDW43_RS04805sulfite exporter TauE/SafE family protein;;	143	18157	18220	11079	990	1360	511	922	13090	14811	1536	9187	16568	8157	3783	2412	6239
CDS	989953	990651	699	+	A10962;CDW43_RS04810phosphoadenylyl-sulfate reductase;;	59	15136	18173	12407	474	502	303	418	32721	35345	2464	9100	16586	9010	3080	2398	6994
CDS	990664	991566	903	+	A10963;CDW43_RS04815sulfate adenylyltransferase subunit CysD;;	93	17873	23525	13250	241	192	268	254	63362	58005	4090	17635	33920	19611	5138	4484	18022
CDS	991681	993111	1431	+	A10964;CDW43_RS04820sulfate adenylyltransferase subunit CysN;;	242	15234	28638	9960	128	120	227	362	69776	69806	4148	16582	32759	20452	6606	6236	20552
CDS	993388	994158	771	+	A10965;CDW43_RS04825EAL domain-containing protein;;	26	7369	6445	2291	118	87	70	64	8784	8851	640	4374	6587	3615	2184	1769	7469
CDS	994138	994692	555	-	A10966;CDW43_RS04830DNA-deoxyinosine glycosylase;;	18	2989	3357	1442	35	70	79	57	3309	3715	424	2387	3277	1693	920	883	2867
CDS	994697	995140	444	-	A10967;CDW43_RS04835DUF3465 domain-containing protein;;	30	3222	3530	1724	63	62	124	129	2788	3015	517	2663	3053	1508	757	641	2397
CDS	995885	997543	1659	+	A10968;CDW43_RS04840nitrite/sulfite reductase;;	86	22347	23239	11104	390	358	631	683	13729	14005	2518	20150	25576	13047	8863	7636	21306
CDS	997527	998009	483	+	A10969;CDW43_RS04845DUF934 domain-containing protein;;	114	8985	8846	3398	178	165	308	334	4430	5118	1124	13558	16926	8456	7259	5720	14251
CDS	998022	998897	876	+	A10970;CDW43_RS04850symmetrical bis(5'-nucleosyl)-tetraphosphatase;;	40	10693	10968	4082	132	117	160	180	6508	5922	1147	9525	11125	5407	4327	3604	9327
CDS	998967	999449	483	+	A10971;CDW43_RS048556,7-dimethyl-8-ribityllumazine synthase;;	81	11511	10893	5161	338	403	733	531	10704	9169	1288	9868	12937	6801	5798	4912	13770
CDS	999450	999911	462	+	A10972;CDW43_RS04860transcription antitermination factor NusB;;	41	11590	11991	5517	185	129	331	246	12353	9951	1175	7688	11054	6576	3801	4109	12210
CDS	999959	1000933	975	+	A10973;CDW43_RS04865thiamine-phosphate kinase;;	18	7360	6958	3563	53	70	115	71	6602	4485	571	3491	6151	3615	3130	2516	7539
CDS	1000917	1001405	489	+	A10974;CDW43_RS04870phosphatidylglycerophosphatase A;;	21	3834	3969	1628	81	79	128	83	3036	2504	385	2632	4421	2733	2585	1857	5731
CDS	1001447	1002382	936	-	A10975;CDW43_RS04875carbohydrate kinase family protein;;	58	7670	8693	2975	135	123	235	115	7078	6208	913	6230	10890	6836	4548	4074	12944
CDS	1002387	1003535	1149	-	A10976;CDW43_RS04880ribonuclease D;;	61	12924	13233	5685	270	280	422	197	11309	10168	1523	9437	13637	8043	4298	4143	14505
CDS	1003572	1004462	891	-	A10977;CDW43_RS04885alpha/beta hydrolase;;	277	19115	17567	8186	1192	1116	1861	1036	5236	5750	1287	17004	18005	8524	4344	3198	10413
CDS	1004516	1004767	252	-	A10978;CDW43_RS04890glutaredoxin family protein;;	3	3794	3171	1059	58	71	66	68	2622	2481	472	2903	4310	2282	1122	988	3321
CDS	1004764	1005279	516	-	A10979;CDW43_RS04895molybdenum cofactor biosynthesis protein B;;	20	5951	5419	1863	169	169	163	149	4633	4654	1097	4780	6703	3184	1991	1632	5337
CDS	1005375	1006055	681	+	A10980;CDW43_RS04900OmpA family protein;;	157	8385	6218	3591	328	317	312	347	8405	8400	2380	10274	14028	6531	5074	4208	12071
CDS	1006096	1006821	726	+	A10981;CDW43_RS0490523S rRNA (guanosine(2251)-2'-O)-methyltransferase RlmB;;	199	5905	4577	2563	225	188	270	227	6746	5477	1548	8644	13321	7469	7089	5761	14426
CDS	1006925	1007269	345	+	A10982;CDW43_RS0491030S ribosomal protein S6;;	380	75228	76448	33566	588	473	1342	717	67002	48356	9758	28744	52680	33166	26799	27707	71239
CDS	1007285	1007512	228	+	A10983;CDW43_RS0491530S ribosomal protein S18;;	178	37231	41220	15763	154	114	319	194	44268	32232	5852	12754	23401	14377	13121	12952	33655
CDS	1007550	1008458	909	+	A10984;CDW43_RS04920hypothetical protein;;	364	65380	74160	25934	422	282	811	414	89657	65108	10167	25680	49317	30190	41478	35797	71767
Pseudo	1008507	1008953	447	+	A10985;CDW43_RS0492550S ribosomal protein L9;partial;pseudo	300	26335	30839	10030	224	239	361	367	44019	30581	4954	18085	32792	20535	26052	22448	48303
CDS	1009158	1010570	1413	+	A10986;CDW43_RS04930replicative DNA helicase;;	117	16312	17637	5379	96	103	125	153	20901	19394	2409	8411	14401	9237	9828	9246	21434
CDS	1010567	1011655	1089	+	A10987;CDW43_RS04935alanine racemase;;	28	4311	5023	1378	35	42	55	46	4808	4305	552	3882	6524	4251	5300	4369	10231
CDS	1011648	1013036	1389	+	A10988;CDW43_RS04940DNA repair protein RadA;;	35	6528	7790	3172	102	126	129	102	6612	5281	837	4123	6710	4034	5025	4054	9546
CDS	1013047	1013424	378	-	A10989;CDW43_RS04945PilZ domain-containing protein;;	22	5982	7102	3248	246	411	306	224	3387	3366	1104	5058	5797	3169	1939	1480	5822
CDS	1013487	1013912	426	+	A10990;CDW43_RS04950protoporphyrinogen oxidase HemJ;;	25	7951	8168	3338	282	288	346	155	4122	4251	883	5075	6291	3106	2483	1918	5417
CDS	1013950	1014522	573	-	A10991;CDW43_RS04955BON domain-containing protein;;	24	6131	6273	3402	112	123	137	177	7021	6055	824	2643	3629	1988	1073	940	3568
CDS	1014561	1014917	357	-	A10992;CDW43_RS04960YraN family protein;;	15	4090	3640	1532	33	72	103	120	3059	2886	349	2762	3996	2508	808	854	3928
CDS	1014923	1016788	1866	-	A10993;CDW43_RS04965penicillin-binding protein activator;;	122	27398	26745	10906	863	831	1237	983	17812	17091	3286	21695	28867	15582	8299	7053	22887
CDS	1016881	1017726	846	+	A10994;CDW43_RS0497016S rRNA (cytidine(1402)-2'-O)-methyltransferase;;	8	3376	3410	1130	72	62	106	108	3231	3705	494	1902	2786	1447	1005	786	2572
CDS	1018535	1019152	618	+	A10996;CDW43_RS04980TetR/AcrR family transcriptional regulator C-terminal domain-containing protein;;	128	4443	12714	1698	583	711	778	156	5390	8320	2502	7655	10377	5266	4603	2844	5484
CDS	1019149	1020489	1341	+	A10997;CDW43_RS04985efflux RND transporter periplasmic adaptor subunit;;	144	2188	16511	1156	320	253	599	127	3819	5943	1866	8937	10938	5249	4238	2491	4900
CDS	1020486	1023590	3105	+	A10998;CDW43_RS04990efflux RND transporter permease subunit;;	211	4308	29118	1785	347	263	405	225	5664	8948	1629	16530	20343	9787	7762	4944	9891
CDS	1023639	1024118	480	+	A10999;CDW43_RS04995cytochrome c;;	10	720	2555	275	10	11	2	29	672	981	210	1073	1488	638	498	293	792
CDS	1024286	1025587	1302	+	A11000;CDW43_RS05000ISL3 family transposase;;	17	1767	5264	569	49	44	57	57	1851	2464	409	3701	5467	3130	2196	1484	3670
CDS	1025895	1026347	453	+	A11001;CDW43_RS05005division/cell wall cluster transcriptional repressor MraZ;;	129	21567	27102	3138	280	202	279	170	10178	13798	4755	11227	15585	8569	8548	6619	14236
CDS	1026357	1027295	939	+	A11002;CDW43_RS0501016S rRNA (cytosine(1402)-N(4))-methyltransferase RsmH;;	106	22109	25678	2463	171	87	104	125	9444	12706	3024	15368	24384	14463	10573	8920	23058
CDS	1027292	1027585	294	+	A11003;CDW43_RS05015cell division protein FtsL;;	16	4361	4486	556	39	21	33	25	1866	2151	407	2238	3762	2111	1955	1668	3803
CDS	1027582	1029291	1710	+	A11004;CDW43_RS05020penicillin-binding transpeptidase domain-containing protein;;	100	22556	22083	3245	227	150	136	205	8949	10196	1606	15544	26897	15393	12639	10211	26508
CDS	1029288	1030808	1521	+	A11005;CDW43_RS05025UDP-N-acetylmuramoyl-L-alanyl-D-glutamate--2,6-diaminopimelate ligase;;	103	20517	20157	2774	211	128	102	210	10125	10775	1477	17424	28325	16842	11264	9193	28842
CDS	1030805	1032157	1353	+	A11006;CDW43_RS05030UDP-N-acetylmuramoyl-tripeptide--D-alanyl-D-alanine ligase;;	108	22438	28089	2841	306	228	179	211	9071	11313	1413	19714	31939	16881	14148	11181	30286
CDS	1032157	1033239	1083	+	A11007;CDW43_RS05035phospho-N-acetylmuramoyl-pentapeptide-transferase;;	85	14830	16885	1942	148	106	80	108	6431	7823	902	10338	18812	10824	9949	7298	19605
CDS	1033236	1034591	1356	+	A11008;CDW43_RS05040UDP-N-acetylmuramoyl-L-alanine--D-glutamate ligase;;	138	22111	23407	2900	176	102	56	98	9698	11500	1364	14625	24435	14065	12690	9623	25653
CDS	1034588	1035727	1140	+	A11009;CDW43_RS05045putative lipid II flippase FtsW;;	83	8377	8549	1368	62	84	46	57	3234	3870	425	7617	13230	7485	5855	4572	12454
CDS	1035724	1036803	1080	+	A11010;CDW43_RS05050undecaprenyldiphospho-muramoylpentapeptide beta-N-acetylglucosaminyltransferase;;	16	8213	8453	1265	82	25	17	54	3958	4439	399	5661	9318	5322	3360	2771	10085
CDS	1036796	1038214	1419	+	A11011;CDW43_RS05055UDP-N-acetylmuramate--L-alanine ligase;;	70	13599	12871	2083	103	116	148	166	6261	6738	698	13047	22240	12669	9776	8240	22296
CDS	1038214	1039104	891	+	A11012;CDW43_RS05060UDP-N-acetylmuramate dehydrogenase;;	72	10427	10000	1630	122	139	76	104	5460	5981	585	7932	13471	7656	6110	4826	14352
CDS	1039101	1040039	939	+	A11013;CDW43_RS05065D-alanine--D-alanine ligase;;	33	10095	9361	1807	164	92	79	90	4743	4932	527	9672	15973	9046	5102	4804	16384
CDS	1040039	1040824	786	+	A11014;CDW43_RS05070cell division protein FtsQ/DivIB;;	48	8496	7534	1685	88	79	81	75	4236	4273	487	6948	11743	5787	3861	3426	11956
CDS	1040824	1042074	1251	+	A11015;CDW43_RS05075cell division protein FtsA;;	44	14269	11742	2573	98	54	74	99	7244	7867	861	8603	14950	7853	5555	4871	15667
CDS	1042111	1043271	1161	+	A11016;CDW43_RS05080cell division protein FtsZ;;	105	21000	16931	3877	170	111	148	224	7198	8664	1475	19121	28089	14730	8806	8772	28093
CDS	1043344	1044261	918	+	A11017;CDW43_RS05085UDP-3-O-acyl-N-acetylglucosamine deacetylase;;	186	61448	61780	24287	1157	941	1724	1255	36471	36805	7349	33851	45151	20599	13019	11731	32249
CDS	1044258	1044710	453	-	A11018;CDW43_RS05090DciA family protein;;	43	17250	15475	6888	293	357	383	343	8743	7637	1249	6626	9674	5154	3723	2881	8731
CDS	1044736	1045656	921	+	A11019;CDW43_RS05095M23 family metallopeptidase;;	68	19615	15022	12258	674	944	873	845	12202	9177	1189	10770	17010	10161	6172	5661	19190
CDS	1045793	1048498	2706	+	A11020;CDW43_RS05100preprotein translocase subunit SecA;;	159	56478	54339	24342	990	809	1614	769	40420	37132	7077	27347	49324	31164	30108	26060	68894
CDS	1048498	1049724	1227	+	A11021;CDW43_RS05105bifunctional glutamate N-acetyltransferase/amino-acid acetyltransferase ArgJ;;	94	17170	16239	3970	98	97	203	153	15781	13624	1861	9261	19058	12982	15994	12351	31352
CDS	1049738	1050790	1053	+	A11022;CDW43_RS05110DUF3549 family protein;;	17	7347	6870	1947	47	45	64	51	7754	5228	646	3215	6265	4502	5740	4539	11806
CDS	1050793	1051344	552	-	A11023;CDW43_RS05115pyridoxamine 5'-phosphate oxidase family protein;;	7	3513	3466	1365	82	79	81	69	2567	2370	445	1656	2755	1598	1390	1125	3408
CDS	1051328	1051891	564	-	A11024;CDW43_RS05120peptide deformylase;;	37	5829	5751	2394	293	272	253	237	2944	3337	914	3193	4002	1915	1411	1074	3060
CDS	1051888	1052529	642	-	A11025;CDW43_RS051252OG-Fe(II) oxygenase;;	17	3773	3399	1515	186	196	173	132	2163	2247	511	2432	2694	1361	942	727	2536
CDS	1052691	1053920	1230	-	A11026;CDW43_RS05130spore maturation protein;;	42	3694	3419	1436	108	113	134	86	2840	2717	462	2124	2882	1549	1280	1034	2709
CDS	1053996	1055804	1809	-	A11027;CDW43_RS05135DEAD/DEAH box helicase;;	161	46058	37793	23881	646	510	727	527	78753	54336	2596	16538	36688	24123	12136	11177	63164
CDS	1055989	1056807	819	+	A11028;CDW43_RS05140formate/nitrite transporter family protein;;	41	2510	2520	1050	102	102	100	123	1114	1230	263	1695	2116	1045	771	630	1655
CDS	1056820	1057029	210	+	A11029;CDW43_RS05145dodecin family protein;;	82	4438	4143	1216	220	210	206	157	1395	1413	723	3578	4130	1832	1674	1112	2400
CDS	1057042	1057605	564	-	A11030;CDW43_RS05150YSC84-related protein;;	121	15001	16312	5059	345	427	434	327	6579	6642	2742	7392	8923	4334	3105	2426	6534
CDS	1057718	1059316	1599	-	A11031;CDW43_RS05155ABC-F family ATPase;;	63	18318	17831	8231	159	146	370	207	21803	15620	2170	5948	11552	7803	7284	6951	19513
CDS	1059371	1059640	270	-	A11032;CDW43_RS05160GIY-YIG nuclease family protein;;	9	2213	2379	1186	45	55	50	38	1593	1361	271	976	1496	938	657	487	1488
CDS	1059627	1060031	405	-	A11033;CDW43_RS05165peptide-methionine (R)-S-oxide reductase MsrB;;	24	4183	3881	2079	156	171	263	175	3352	2802	474	2982	4382	2467	1950	1499	4339
CDS	1060139	1063669	3531	-	A11034;CDW43_RS05170transporter substrate-binding domain-containing protein;;	209	32032	29733	13124	482	483	624	681	12655	12334	2967	32445	41494	23153	8090	6832	28970
CDS	1063638	1064687	1050	-	A11035;CDW43_RS05175response regulator;;	245	19497	16779	8458	668	761	792	650	6161	6688	2683	21940	22548	10297	4241	3378	11899
CDS	1065087	1065770	684	+	A11036;CDW43_RS05180uracil-DNA glycosylase;;	27	6777	7463	2157	175	207	243	155	3802	3650	873	3932	5818	3269	2648	2255	6231
CDS	1065848	1067743	1896	+	A11037;CDW43_RS05185ATP-binding cassette domain-containing protein;;	104	13357	14176	4772	324	401	499	341	12430	10992	2164	7943	10987	6253	5963	4603	9491
CDS	1067747	1069549	1803	+	A11038;CDW43_RS05190ATP-binding cassette domain-containing protein;;	48	7037	7545	3111	134	114	231	212	7887	7887	1729	8863	12077	6391	5462	4556	12691
CDS	1069562	1070770	1209	-	A11039;CDW43_RS05195IS256 family transposase;;	69	8070	8336	3451	115	111	119	29	7656	7875	1788	12162	15829	8575	4147	3367	13283
CDS	1071031	1071795	765	-	A11040;CDW43_RS05200hypothetical protein;;	65	18365	17134	7092	599	541	509	692	7306	7829	2374	12367	15593	7398	4079	3236	12035
CDS	1071859	1072614	756	-	A11041;CDW43_RS05205DUF4197 domain-containing protein;;	25	6896	4795	2847	205	262	211	214	3476	3492	1328	6081	8497	4694	1746	1502	8057
CDS	1072759	1072968	210	-	A11042;CDW43_RS05210cold shock domain-containing protein;;	837	105314	54106	66251	7195	8738	6088	10021	59280	51215	10788	54947	81346	32421	33145	23857	79609
CDS	1073264	1073530	267	-	A11043;CDW43_RS05215oxidative damage protection protein;;	43	9929	10140	3517	217	370	330	279	8618	7981	1767	10255	15455	9169	4206	4105	17619
CDS	1073527	1074576	1050	-	A11044;CDW43_RS05220A/G-specific adenine glycosylase;;	66	12802	11597	3626	241	259	344	264	11191	10559	1507	11931	19358	10924	7420	5983	21129
CDS	1074629	1077094	2466	-	A11045;CDW43_RS05225AsmA family protein;;	168	40191	37645	13155	757	677	996	933	26886	28919	6314	37735	49654	26912	14530	12405	41129
CDS	1077154	1079085	1932	-	A11046;CDW43_RS05230hypothetical protein;;	56	11525	12395	4202	123	175	238	182	9275	9556	1060	10475	14494	8927	4117	3527	15386
CDS	1079087	1080370	1284	-	A11047;CDW43_RS05235HlyC/CorC family transporter;;	67	11685	11385	4769	215	214	362	240	10716	10614	1170	9292	13516	8119	4296	3438	11463
CDS	1080375	1081172	798	-	A11048;CDW43_RS05240cytochrome c biogenesis protein CcsA;;	96	11775	10451	4409	274	409	379	306	8110	8724	1456	11886	16109	8362	3233	2840	10552
CDS	1081383	1082753	1371	+	A11049;CDW43_RS05245signal recognition particle protein;;	63	27447	28152	9412	635	600	679	500	19730	23451	4033	21824	26966	12935	5563	5372	17374
CDS	1082840	1083088	249	+	A11050;CDW43_RS0525030S ribosomal protein S16;;	63	69371	58856	24432	540	398	1146	475	37531	35765	5104	18336	32480	17101	17179	15227	33434
CDS	1083110	1083631	522	+	A11051;CDW43_RS05255ribosome maturation factor RimM;;	39	84573	77185	31138	442	204	800	369	59377	55858	6426	14535	25149	12238	13518	11134	28866
CDS	1083641	1084384	744	+	A11052;CDW43_RS05260tRNA (guanosine(37)-N1)-methyltransferase TrmD;;	89	70256	64387	26915	318	181	677	420	64491	61345	4907	10682	18061	9841	11960	9428	21557
CDS	1084398	1084742	345	+	A11053;CDW43_RS0526550S ribosomal protein L19;;	167	41559	39658	14549	298	194	512	555	61022	54936	4201	15244	26838	15005	20328	15195	29503
CDS	1084858	1085763	906	+	A11054;CDW43_RS05270site-specific tyrosine recombinase XerD;;	9	4067	3865	1633	32	60	83	39	9876	7745	465	1940	3638	2421	1862	1687	5410
CDS	1085832	1086317	486	+	A11055;CDW43_RS05275YajQ family cyclic di-GMP-binding protein;;	10	6965	8190	5002	412	485	710	399	4306	3469	723	3913	5168	2359	1723	1381	4400
CDS	1086330	1087049	720	+	A11056;CDW43_RS05280thioredoxin fold domain-containing protein;;	37	10056	9699	5622	254	196	457	228	5749	4589	1011	8016	9965	5277	3295	2774	7962
CDS	1087046	1087798	753	-	A11057;CDW43_RS05285UDP-2,3-diacylglucosamine diphosphatase;;	12	7908	7844	5157	132	115	195	124	5131	4106	821	6763	9822	5592	3258	2881	9243
CDS	1087816	1088397	582	-	A11058;CDW43_RS05290peptidylprolyl isomerase;;	29	6033	5819	3815	136	117	234	134	4878	4619	1319	4654	6777	3919	2297	2316	7664
CDS	1088562	1090229	1668	+	A11059;CDW43_RS05295glutamine--tRNA ligase/YqeY domain fusion protein;;	110	17653	14405	5546	362	333	660	473	24374	18622	3167	11549	18757	11043	8433	7815	22612
CDS	1090233	1091615	1383	+	A11060;CDW43_RS05300cysteine--tRNA ligase;;	48	11527	10237	3251	172	194	466	472	9881	7300	1694	7770	12852	7833	8702	7111	16504
CDS	1091772	1092968	1197	+	A11061;CDW43_RS05305acetate/propionate family kinase;;	5	5418	4100	1369	207	200	501	704	2257	2219	400	3312	3830	1977	923	838	3074
CDS	1092982	1095363	2382	+	A11062;CDW43_RS05310phosphoketolase family protein;;	75	13444	8442	3335	314	287	437	1553	6663	6283	1337	10901	13311	6469	3657	3035	8820
CDS	1095414	1096268	855	-	A11063;CDW43_RS05315bifunctional methylenetetrahydrofolate dehydrogenase/methenyltetrahydrofolate cyclohydrolase FolD;;	24	7352	6442	3139	286	244	449	190	12297	10585	1484	3003	4797	2754	3335	3001	5766
CDS	1096633	1097049	417	-	A11066;CDW43_RS05330hypothetical protein;;	17	7691	5380	7693	126	150	245	112	10753	10764	1032	2757	4285	2449	1648	1372	4675
CDS	1097280	1098164	885	+	A11067;CDW43_RS05335IS982 family transposase;;	19	4352	6511	3026	81	124	131	124	2439	2594	505	3134	4082	2215	1253	1093	3421
CDS	1098508	1101174	2667	+	A11068;CDW43_RS05340DUF1566 domain-containing protein;;	30	8037	7953	4572	399	628	601	405	8909	7263	1728	5062	6920	3687	5371	4976	8749
CDS	1101493	1102563	1071	+	A11069;CDW43_RS05345dTDP-glucose 4,6-dehydratase;;	108	7908	7515	2832	275	284	316	370	8643	7385	2339	10541	19194	14518	8375	8296	39568
CDS	1102560	1103441	882	+	A11070;CDW43_RS05350glucose-1-phosphate thymidylyltransferase RfbA;;	66	3797	4222	1625	144	161	244	198	3338	2850	833	8876	16211	10697	6587	6413	27698
CDS	1103441	1103986	546	+	A11071;CDW43_RS05355dTDP-4-dehydrorhamnose 3,5-epimerase;;	37	5122	6096	2190	151	140	211	169	3350	3095	1045	5744	9962	6651	4248	3773	16011
CDS	1103987	1104859	873	+	A11072;CDW43_RS05360dTDP-4-dehydrorhamnose reductase;;	43	5445	4471	1213	96	97	168	143	6199	5115	955	8609	15703	11065	7994	6989	22671
CDS	1104908	1106866	1959	+	A11073;CDW43_RS05365nucleoside-diphosphate sugar epimerase/dehydratase;;	58	5241	6504	2326	175	215	866	1147	5996	4000	636	6348	13034	9227	6360	5754	24655
CDS	1106876	1108054	1179	+	A11074;CDW43_RS05370nucleotide sugar dehydrogenase;;	54	6782	6534	1848	233	270	478	1004	7387	6234	1308	9109	14017	10220	8525	7581	24823
CDS	1108169	1110067	1899	+	A11075;CDW43_RS05375glutamine--fructose-6-phosphate transaminase (isomerizing);;	40	27570	17396	7249	577	604	879	615	16480	16175	2870	18412	24434	13684	9322	7879	22623
CDS	1110108	1111193	1086	+	A11076;CDW43_RS05380GDP-mannose 4,6-dehydratase;;	1	7988	3167	709	68	93	153	145	7761	6520	1211	9718	14334	8055	5324	4554	15657
CDS	1111285	1112355	1071	+	A11077;CDW43_RS05385GDP-L-fucose synthase;;	0	6301	1912	88	33	36	55	32	7738	5377	713	5791	9208	5431	2387	2098	10275
CDS	1112391	1114151	1761	+	A11078;CDW43_RS05390ABC transporter ATP-binding protein;;	0	5777	1977	104	46	53	52	65	8703	5853	714	6105	9836	6402	3186	3074	13667
CDS	1114156	1115154	999	+	A11079;CDW43_RS05395UDP-N-acetylglucosamine 4,6-dehydratase (inverting);;	0	8063	3285	136	75	118	134	90	9137	7857	1356	12367	18349	10984	6344	5825	20833
CDS	1115157	1116314	1158	+	A11080;CDW43_RS05400UDP-4-amino-4,6-dideoxy-N-acetyl-beta-L-altrosamine transaminase;;	0	16218	6587	242	162	227	332	217	15051	14018	1910	16184	23745	13998	7139	6162	25008
CDS	1116314	1117180	867	+	A11081;CDW43_RS05405aldo/keto reductase;;	0	8566	3470	140	143	134	167	105	10197	8989	1175	9989	15546	9997	4616	4122	17488
CDS	1117177	1118079	903	+	A11082;CDW43_RS05410Gfo/Idh/MocA family oxidoreductase;;	0	15011	5693	219	224	303	382	241	10298	10026	1997	17814	25210	14336	7199	6437	24932
CDS	1118076	1118834	759	+	A11083;CDW43_RS05415SDR family oxidoreductase;;	0	4354	1972	69	50	49	53	63	5673	4837	550	7523	12405	7404	3943	3685	15426
CDS	1118819	1119532	714	+	A11084;CDW43_RS05420acylneuraminate cytidylyltransferase family protein;;	0	4783	2124	69	71	79	70	42	6356	5010	562	5761	10429	6085	3478	3363	12860
CDS	1119569	1120651	1083	+	A11085;CDW43_RS05425UDP-2,4-diacetamido-2,4,6-trideoxy-beta-L-altropyranose hydrolase;;	0	9265	3854	165	135	162	227	131	10621	9119	1177	10593	17587	10052	7129	5831	19608
CDS	1120648	1121292	645	+	A11086;CDW43_RS05430formyltransferase family protein;;	0	5800	2459	134	116	144	151	63	7246	6649	845	5353	8032	5342	2280	2184	10406
CDS	1121285	1122343	1059	+	A11087;CDW43_RS05435pseudaminic acid synthase;;	0	6435	2405	129	138	208	246	136	8222	8056	950	11113	17413	10085	6177	5324	20609
CDS	1122336	1123328	993	+	A11088;CDW43_RS05440class I SAM-dependent methyltransferase;;	0	12676	5468	235	273	341	376	159	15067	14691	2209	21471	33680	20735	11537	10640	41679
CDS	1123325	1124452	1128	+	A11089;CDW43_RS05445N-acetyl sugar amidotransferase;;	0	10072	4200	141	105	126	134	67	12080	10501	1128	9670	16569	11169	6055	5556	23384
CDS	1124449	1125060	612	+	A11090;CDW43_RS05450imidazole glycerol phosphate synthase subunit HisH;;	0	5994	2606	74	71	82	99	55	10198	8045	875	6416	11785	7917	4086	3864	18123
CDS	1125053	1125817	765	+	A11091;CDW43_RS05455HisA/HisF-related TIM barrel protein;;	0	7367	2894	120	170	225	326	144	9224	7621	940	11094	18879	12149	5674	5394	26722
CDS	1125830	1127077	1248	+	A11092;CDW43_RS05460N-acetyl sugar amidotransferase;;	0	12380	5324	207	149	158	221	119	20086	16658	1735	10694	19564	13098	6220	5816	28891
CDS	1127077	1128105	1029	+	A11093;CDW43_RS05465hypothetical protein;;	0	9814	4445	171	92	155	171	63	17344	13378	1480	7293	12697	9009	5240	4592	20772
CDS	1128362	1129591	1230	+	A11094;CDW43_RS05470adenylyl-sulfate kinase;;	0	5648	2464	89	53	96	114	48	12497	9202	1174	3904	7206	4727	3187	3177	13999
CDS	1129619	1130344	726	+	A11095;CDW43_RS05475CDP-alcohol phosphatidyltransferase family protein;;	0	2187	876	54	49	97	32	30	3645	2964	391	2472	4344	2924	2470	2239	9385
CDS	1130377	1131411	1035	+	A11096;CDW43_RS05480glycosyltransferase family 2 protein;;	0	11366	3771	185	151	158	226	132	13362	11344	1848	7610	11268	6375	3956	3744	14800
CDS	1131404	1132339	936	+	A11097;CDW43_RS05485glycosyltransferase;;	0	7412	2957	118	119	81	151	88	12119	8768	1340	6322	10484	6293	4562	3819	14222
CDS	1132336	1133112	777	+	A11098;CDW43_RS05490glycosyltransferase family 2 protein;;	0	7595	3253	174	119	151	176	136	9374	7231	1196	9220	13660	8987	4206	3580	18186
CDS	1133126	1134574	1449	+	A11099;CDW43_RS05495phosphomannomutase CpsG;;	19	11297	6141	712	98	126	167	150	14569	11241	1780	14453	23665	15115	9019	8149	32424
CDS	1134574	1135554	981	+	A11100;CDW43_RS05500NAD-dependent epimerase/dehydratase family protein;;	0	5077	2483	97	524	931	1213	1108	9064	7203	913	5966	10384	7038	4325	3878	15653
CDS	1135712	1136944	1233	+	A11101;CDW43_RS05505hypothetical protein;;	0	1729	789	24	149	114	227	281	4771	3728	381	1832	2727	1582	1730	1440	3841
CDS	1137011	1137568	558	+	A11102;CDW43_RS05510sugar transferase;;	0	3237	2426	626	80	87	134	201	4916	4448	614	3528	5590	3128	2166	1730	5905
CDS	1137643	1138245	603	+	A11103;CDW43_RS05515adenylyl-sulfate kinase;;	56	4536	4611	1481	105	77	104	112	4373	3845	983	6093	8926	4573	3099	2677	8133
CDS	1138252	1139211	960	+	A11104;CDW43_RS05520DHHA1 domain-containing protein;;	47	5110	7157	2547	99	130	159	113	5039	4709	827	6018	8554	4773	3947	3581	8438
CDS	1139377	1139643	267	+	A11105;CDW43_RS05525helix-hairpin-helix domain-containing protein;;	52	69989	47166	3219	1853	757	362	135	33850	28820	25375	239618	313535	164904	84970	48085	242344
CDS	1139701	1142337	2637	-	A11106;CDW43_RS05530[protein-PII] uridylyltransferase;;	85	21204	17420	6246	393	414	682	608	20631	18564	6274	22525	39858	25012	15490	12697	43630
CDS	1142350	1143117	768	-	A11107;CDW43_RS05535type I methionyl aminopeptidase;;	106	13168	13217	4679	530	624	774	487	8925	8829	2458	8654	13104	6825	5058	4468	11728
CDS	1143379	1144131	753	+	A11108;CDW43_RS0554030S ribosomal protein S2;;	585	56120	71626	30243	1644	2070	3414	3272	76092	55741	14479	16179	27038	17166	18336	19592	42040
CDS	1144236	1145117	882	+	A11109;CDW43_RS05545translation elongation factor Ts;;	91	22365	22404	11079	256	230	677	450	36845	21220	5396	7689	15057	9760	10993	11469	29042
CDS	1145120	1145845	726	+	A11110;CDW43_RS05550UMP kinase;;	63	16855	16601	7642	100	79	311	190	21578	12751	3017	5127	10126	6319	7443	6822	17235
CDS	1145854	1146411	558	+	A11111;CDW43_RS05555ribosome recycling factor;;	74	10501	10904	4684	164	153	336	231	11767	7728	2283	7542	13315	8757	8410	7778	20133
CDS	1146435	1147169	735	+	A11112;CDW43_RS05560isoprenyl transferase;;	83	10770	12541	4007	159	160	185	208	11019	8510	1945	7320	13504	8537	10247	8910	19402
CDS	1147171	1147995	825	+	A11113;CDW43_RS05565phosphatidate cytidylyltransferase;;	22	3165	3636	1215	44	64	59	52	3754	3285	482	2312	4934	3041	5311	3885	8250
CDS	1147995	1149185	1191	+	A11114;CDW43_RS055701-deoxy-D-xylulose-5-phosphate reductoisomerase;;	58	4849	5980	1873	117	77	116	78	7557	5014	780	4161	8029	4925	6895	5498	12929
CDS	1149173	1150510	1338	+	A11115;CDW43_RS05575RIP metalloprotease RseP;;	22	5151	6291	1875	131	92	153	113	7418	4470	798	4181	6910	4501	3978	3468	10132
CDS	1150567	1152843	2277	+	A11116;CDW43_RS05580outer membrane protein assembly factor BamA;;	284	76816	64303	31983	1229	1241	2280	1924	58359	47878	10987	58646	89682	48020	26675	23786	86622
CDS	1152864	1153364	501	+	A11117;CDW43_RS05585OmpH family outer membrane protein;;	43	29594	26511	10873	205	252	460	372	22137	17022	3851	14730	23513	11035	7703	6466	26671
CDS	1153378	1154391	1014	+	A11118;CDW43_RS05590UDP-3-O-(3-hydroxymyristoyl)glucosamine N-acyltransferase;;	127	37424	37096	11958	256	291	474	478	29893	23602	4151	28497	50222	27842	18142	14695	55001
CDS	1154488	1154937	450	+	A11119;CDW43_RS055953-hydroxyacyl-ACP dehydratase FabZ;;	58	12195	15010	3896	201	211	170	225	11741	9359	1603	9760	19488	12914	6077	5628	24969
CDS	1154934	1155704	771	+	A11120;CDW43_RS05600acyl-ACP--UDP-N-acetylglucosamine O-acyltransferase;;	143	17588	22218	6565	203	242	198	252	15900	12532	1900	13755	25962	15861	10356	8900	31900
CDS	1155740	1156924	1185	-	A11121;CDW43_RS05605ammonium transporter;;	707	18422	17167	12084	80	66	154	214	3399	2678	390	2098	3281	1767	1349	1202	3252
CDS	1157221	1157862	642	+	A11122;CDW43_RS05610tetratricopeptide repeat protein;;	35	7235	5828	4035	212	201	506	248	8358	6803	1676	3309	5559	3163	2600	2642	7799
CDS	1157852	1159027	1176	+	A11123;CDW43_RS05615outer membrane protein assembly factor BamB;;	91	10766	9168	4078	208	200	630	399	8231	5484	1459	9782	16535	9448	10177	8337	22091
CDS	1159024	1160433	1410	+	A11124;CDW43_RS05620ribosome biogenesis GTPase Der;;	63	11062	9320	3575	119	92	281	220	10571	6134	1684	11570	20842	12872	10193	8417	29765
CDS	1160531	1160869	339	-	A11125;CDW43_RS05625hypothetical protein;;	44	4505	4044	1523	185	293	281	338	2640	2293	538	2217	3216	2045	1243	1050	3241
CDS	1160995	1163175	2181	+	A11126;CDW43_RS05630type I secretion system permease/ATPase;;	134	17668	14320	5943	561	646	627	522	11069	9545	1667	11459	14450	7695	6233	5045	11246
CDS	1163180	1164508	1329	+	A11127;CDW43_RS05635HlyD family type I secretion periplasmic adaptor subunit;;	39	10539	9091	3636	215	216	282	223	5675	4485	1312	7491	10197	5227	4133	3326	8893
CDS	1164524	1165174	651	+	A11128;CDW43_RS05640response regulator transcription factor;;	50	11081	8943	4269	400	385	362	278	5140	4298	1664	11152	14387	7892	5863	4763	11720
CDS	1165312	1166631	1320	+	A11129;CDW43_RS05645TolC family outer membrane protein;;	151	30619	27546	15023	924	1119	1316	1515	22116	17874	5171	21723	30324	17223	12890	11223	30633
CDS	1166778	1167293	516	+	A11130;CDW43_RS056503-hydroxyacyl-[acyl-carrier-protein] dehydratase FabA;;	134	14324	14203	6331	484	565	856	694	11257	8250	2343	9260	12860	6985	7402	6432	15895
CDS	1167303	1168520	1218	+	A11131;CDW43_RS05655beta-ketoacyl-ACP synthase I;;	149	15176	17628	7541	472	430	740	828	9393	6889	1769	14713	21443	11006	11853	9892	23641
CDS	1168564	1168734	171	-	A11132;CDW43_RS16260hypothetical protein;;	7	4214	6154	2383	143	98	163	118	2463	1841	297	2019	2504	1223	1410	992	2048
CDS	1168791	1169555	765	+	A11133;CDW43_RS05660alpha/beta fold hydrolase;;	23	5690	6665	2163	165	161	135	196	3631	3040	839	3753	4993	2610	1971	1563	4664
CDS	1169548	1169898	351	+	A11134;CDW43_RS05665nucleotide pyrophosphohydrolase;;	11	3372	4090	1502	35	47	42	34	1906	1721	388	1986	2560	1484	618	524	2324
CDS	1169959	1170816	858	+	A11135;CDW43_RS05670formyltetrahydrofolate deformylase;;	36	6500	7189	3794	173	206	359	192	6824	6389	928	3175	4549	2570	1905	1678	4750
CDS	1171209	1171970	762	+	A11136;CDW43_RS05675SDR family oxidoreductase;;	23	5242	4823	2508	87	101	152	97	2659	2280	777	2195	3150	1740	1581	1387	3767
CDS	1172140	1174266	2127	-	A11137;CDW43_RS05680TonB-dependent receptor;;	15	79013	36600	4755	64	110	137	88	4614	3678	637	2448	3843	2308	1607	1470	4511
CDS	1174340	1174627	288	-	A11138;CDW43_RS05685hypothetical protein;;	12	10484	5807	1122	386	579	309	210	1294	1106	192	2363	2698	1394	1241	1043	1866
CDS	1174632	1175774	1143	-	A11139;CDW43_RS05690succinyl-diaminopimelate desuccinylase;;	30	32275	22174	5017	322	389	280	225	6264	6139	1529	5387	7379	4091	3475	3142	6730
CDS	1175764	1176108	345	-	A11140;CDW43_RS05695ArsC family reductase;;	20	18480	10988	2818	55	43	81	48	3052	2556	1271	2651	4367	2981	1785	1832	5247
CDS	1176263	1177084	822	-	A11141;CDW43_RS057002,3,4,5-tetrahydropyridine-2,6-dicarboxylate N-succinyltransferase;;	59	11896	8590	5162	125	102	175	104	8771	5761	2000	6618	12138	7179	5972	5746	14653
CDS	1177098	1178297	1200	-	A11142;CDW43_RS05705succinyldiaminopimelate transaminase;;	68	16869	14864	9087	390	267	499	275	12637	10439	1763	12680	19723	10993	7149	6376	17220
CDS	1178371	1179261	891	+	A11143;CDW43_RS05710DMT family transporter;;	55	3511	3444	1284	100	88	159	119	2444	2310	592	2676	4044	2240	2087	1658	4661
CDS	1179340	1179726	387	+	A11144;CDW43_RS05715VOC family protein;;	27	3479	3505	1301	108	112	168	118	2224	2152	639	2760	3781	2020	1220	986	3687
CDS	1180284	1180427	144	+	A11145;CDW43_RS16265hypothetical protein;;	0	1533	1553	566	16	23	28	31	641	709	133	626	998	586	303	357	1084
CDS	1180830	1181696	867	-	A11146;CDW43_RS05720tRNA 2-thiocytidine(32) synthetase TtcA;;	62	10490	10001	3792	195	216	271	241	6445	6274	1025	11602	15816	8978	4002	3698	13735
CDS	1181696	1182961	1266	-	A11147;CDW43_RS05725bifunctional molybdopterin-guanine dinucleotide biosynthesis adaptor protein MobB/molybdopterin molybdotransferase MoeA;;	75	12216	12577	4004	244	227	354	285	8856	9471	1837	13867	17870	9379	5294	4876	13969
CDS	1182954	1184069	1116	-	A11148;CDW43_RS05730molybdenum cofactor guanylyltransferase MobA;;	102	17120	16684	6208	411	437	544	479	15263	16371	3553	20746	25865	12798	6421	5517	20200
CDS	1184108	1184752	645	+	A11149;CDW43_RS05735retropepsin-like aspartic protease;;	43	8881	7327	2791	134	153	183	262	5594	5998	1169	5604	8153	4402	2347	1933	9256
CDS	1184870	1185679	810	-	A11150;CDW43_RS05740GTP cyclohydrolase FolE2;;	93	39964	41959	9210	963	862	669	677	30604	45182	9589	26852	38817	20479	8275	7478	28173
CDS	1185688	1186068	381	-	A11151;CDW43_RS057456-carboxytetrahydropterin synthase QueD;;	50	20594	20853	5987	536	438	288	278	14444	23202	5483	12593	16196	9331	3287	2984	12677
CDS	1186116	1187951	1836	-	A11152;CDW43_RS057501-deoxy-D-xylulose-5-phosphate synthase;;	76	14949	13029	6086	116	161	316	153	16616	13620	1747	11429	20901	13177	11133	9002	23606
CDS	1187951	1188817	867	-	A11153;CDW43_RS05755(2E,6E)-farnesyl diphosphate synthase;;	69	15387	13240	7078	216	193	398	268	13505	12063	2066	9322	14415	8507	7682	6336	13822
CDS	1188844	1189089	246	-	A11154;CDW43_RS05760exodeoxyribonuclease VII small subunit;;	18	6897	4970	3489	118	112	249	131	5396	4781	904	3008	4539	2466	1630	1465	4238
CDS	1189215	1190156	942	+	A11155;CDW43_RS05765bifunctional riboflavin kinase/FAD synthetase;;	15	5395	5014	1814	147	107	190	101	3964	3527	535	4166	6604	3901	3164	2762	7442
CDS	1190165	1190389	225	-	A11156;CDW43_RS05770DUF2007 domain-containing protein;;	10	1681	1704	715	26	24	46	8	2234	1592	156	1065	1762	1110	890	746	2407
CDS	1190392	1191438	1047	-	A11157;CDW43_RS05775META domain-containing protein;;	60	9044	9417	4538	273	239	320	239	13411	11670	1407	8718	12762	7529	4596	4028	13077
CDS	1191467	1191880	414	-	A11158;CDW43_RS05780nucleoside diphosphate kinase regulator;;	39	6306	6196	3590	107	125	196	129	10255	10313	1431	4523	5941	3618	2607	2130	6957
CDS	1192052	1192297	246	-	A11159;CDW43_RS05785hypothetical protein;;	43	3361	3189	1020	136	70	120	91	3039	3668	489	3062	4161	2142	1645	1247	3874
CDS	1192367	1194625	2259	-	A11160;CDW43_RS05790lipopolysaccharide kinase InaA family protein;;	91	17759	18322	5543	256	232	426	322	21868	23489	2562	14710	21967	12719	7722	6523	21624
CDS	1194756	1195088	333	-	A11161;CDW43_RS05795SMR family transporter;;	24	4461	4504	1741	69	37	78	44	3811	4002	436	2890	3546	1724	1477	1078	2700
CDS	1195098	1195466	369	-	A11162;CDW43_RS05800DUF202 domain-containing protein;;	21	4361	4266	1410	108	94	172	87	3596	4102	564	3287	4021	1713	1456	993	2540
CDS	1195470	1196111	642	-	A11163;CDW43_RS058052OG-Fe(II) oxygenase;;	44	5560	5699	2202	242	291	314	214	4931	5986	1214	8346	9462	4482	2546	2019	5988
CDS	1196348	1197088	741	+	A11164;CDW43_RS05810ferredoxin--NADP reductase;;	22	3720	3890	1061	116	109	113	85	1459	2066	553	4592	5437	2275	1258	898	3301
CDS	1197325	1198503	1179	+	A11165;CDW43_RS05815N(2)-acetyl-L-2,4-diaminobutanoate deacetylase DoeB2;;	264	6162	5895	1988	412	548	352	315	2515	4456	851	17394	20369	8812	4420	3425	10131
CDS	1198538	1199818	1281	+	A11166;CDW43_RS05820aspartate aminotransferase family protein;;	196	13584	11213	3123	163	134	216	247	4211	7329	1528	25684	32025	14738	5290	4280	15902
CDS	1199815	1201074	1260	+	A11167;CDW43_RS05825ectoine hydrolase;;	94	8983	7879	2201	90	104	148	217	4135	5669	1028	28295	36907	18690	5142	4397	20770
CDS	1201090	1202451	1362	+	A11168;CDW43_RS05830NAD-dependent succinate-semialdehyde dehydrogenase;;	74	8563	8098	2403	78	70	85	122	4059	4651	833	17588	23488	12284	3734	3562	15953
CDS	1202491	1203078	588	-	A11169;CDW43_RS05835ABC-type transport auxiliary lipoprotein family protein;;	18	3050	2928	1071	49	40	50	80	1723	1780	235	3026	4163	2307	920	767	3250
CDS	1203091	1204761	1671	-	A11170;CDW43_RS05840intermembrane transport protein PqiB;;	22	5671	6592	2264	83	77	161	118	3753	4082	697	3997	5242	2754	1700	1575	4738
CDS	1204762	1206093	1332	-	A11171;CDW43_RS05845paraquat-inducible protein A;;	55	7296	7750	2430	197	184	222	162	3524	4248	778	5294	7802	4256	2835	1927	6238
CDS	1206330	1206584	255	+	A11172;CDW43_RS05850DUF4282 domain-containing protein;;	7	2178	1607	473	37	30	54	36	1777	1523	261	3612	6421	3724	2888	1941	7575
CDS	1206645	1206986	342	-	A11173;CDW43_RS05855zinc ribbon domain-containing protein YjdM;;	6	2822	2317	1315	31	26	57	40	2306	2000	369	1519	2578	1644	824	685	2713
CDS	1207537	1208022	486	+	A11174;CDW43_RS05860prepilin-type N-terminal cleavage/methylation domain-containing protein;;	6	6804	4761	1333	152	208	132	55	2712	2744	1404	18232	20112	9180	2523	2107	12286
CDS	1208038	1210875	2838	+	A11175;CDW43_RS05865EAL domain-containing protein;;	8	14777	11139	4397	182	187	271	105	7125	7567	1878	13331	18587	9269	4386	3711	14955
CDS	1210899	1211567	669	-	A11176;CDW43_RS05870SDR family oxidoreductase;;	11	5465	4907	1585	131	140	100	51	2338	2347	1076	2690	2948	1566	1231	963	2336
CDS	1211727	1212317	591	-	A11177;CDW43_RS05875DUF5610 domain-containing protein;;	94	13103	8681	3236	166	204	244	209	3851	2515	2295	1052	1440	808	2795	1917	1387
CDS	1212411	1213262	852	-	A11178;CDW43_RS05880initiation factor 2B;;	4	3332	4030	1545	55	34	86	46	2951	2902	449	2156	3184	2001	1441	1184	3334
CDS	1213268	1214497	1230	-	A11179;CDW43_RS05885MFS transporter;;	37	7428	8398	3355	157	88	208	154	6215	6318	905	5031	7116	4576	3891	3037	7889
CDS	1214745	1215236	492	-	A11180;CDW43_RS05890hypothetical protein;;	100	28749	27278	9843	237	223	153	355	13400	10811	3598	13624	18717	9945	4774	4798	17150
CDS	1215361	1216059	699	-	A11181;CDW43_RS05895hypothetical protein;;	0	2414	1962	982	89	85	108	68	1280	1319	343	1549	2124	1069	476	436	1786
CDS	1216218	1216754	537	+	A11182;CDW43_RS05900histidine phosphatase family protein;;	6	2016	2041	754	70	82	70	92	899	871	256	1593	1852	993	432	412	1574
CDS	1216983	1219289	2307	+	A11183;CDW43_RS05905mechanosensitive ion channel;;	66	11823	13311	3629	233	218	478	478	6780	6465	1486	14726	23541	12901	6918	5500	25539
CDS	1219350	1219664	315	-	A11184;CDW43_RS05910hypothetical protein;;	14	1129	1178	410	16	14	29	23	754	713	119	1286	2456	1749	722	569	3563
CDS	1220357	1221739	1383	+	A11185;CDW43_RS05915ATP-dependent RNA helicase DbpA;;	50	3869	3070	1904	232	196	510	530	6198	4605	438	1595	2640	1657	1601	1548	4023
CDS	1221807	1222745	939	+	A11186;CDW43_RS05920sensor domain-containing diguanylate cyclase;;	29	5232	4373	2180	279	275	344	316	4529	4039	882	3603	4655	2730	2141	1838	5550
CDS	1222742	1223440	699	-	A11187;CDW43_RS05925MBL fold metallo-hydrolase;;	14	2718	2701	1200	72	63	214	58	2990	2622	583	2380	4183	2739	1494	1653	5294
CDS	1223452	1224276	825	-	A11188;CDW43_RS05930sulfite exporter TauE/SafE family protein;;	21	1017	1327	464	22	28	286	28	2016	1871	708	1829	3407	2489	1952	1896	4707
CDS	1224282	1224809	528	-	A11189;CDW43_RS05935rhodanese-like domain-containing protein;;	17	1882	2080	866	52	24	303	39	2737	2730	1714	1336	2586	1662	1408	1322	3310
CDS	1224806	1225156	351	-	A11190;CDW43_RS05940metalloregulator ArsR/SmtB family transcription factor;;	8	2279	2325	1061	30	4	316	11	2076	2102	1163	842	1510	1089	448	495	2113
CDS	1225322	1225816	495	-	A11191;CDW43_RS05945YbaK/EbsC family protein;;	18	4622	5163	1984	94	77	155	135	3893	3365	919	2067	3237	1645	1903	1718	3330
CDS	1225874	1226428	555	-	A11192;CDW43_RS05950TMEM165/GDT1 family protein;;	24	3224	2782	1623	61	83	139	88	7361	6569	569	1270	2058	1296	1246	1010	2817
CDS	1226704	1227204	501	-	A11193;CDW43_RS05955hypothetical protein;;	4	2730	2820	1306	78	61	69	33	1624	1803	221	1990	2657	1381	760	763	1955
CDS	1227197	1227934	738	-	A11194;CDW43_RS05960tRNA threonylcarbamoyladenosine dehydratase;;	5	3663	3050	1252	107	112	190	79	2417	2712	602	4294	4808	2410	1519	1414	3413
CDS	1228055	1230103	2049	-	A11195;CDW43_RS05965DUF3488 and transglutaminase-like domain-containing protein;;	55	3921	2665	1742	100	32	139	78	2524	2804	376	7495	10479	5742	2338	1792	7589
CDS	1230093	1231055	963	-	A11196;CDW43_RS05970DUF58 domain-containing protein;;	15	3546	2703	1463	95	56	121	84	1267	1491	363	6110	7971	4082	1786	1310	4735
CDS	1231055	1231966	912	-	A11197;CDW43_RS05975MoxR family ATPase;;	32	4056	3585	1359	133	200	215	97	1386	1843	542	7431	7552	3457	1656	1262	3656
CDS	1232061	1232354	294	+	A11198;CDW43_RS05980ferritin-like domain-containing protein;;	8	4510	3771	1601	89	74	124	88	1374	1679	533	1460	2093	1019	586	530	1852
CDS	1232355	1233119	765	-	A11199;CDW43_RS05985TatD family hydrolase;;	56	7050	6062	2285	192	206	236	227	2741	2854	876	5242	7261	3986	1955	1690	6543
CDS	1233154	1233615	462	+	A11200;CDW43_RS05990hypothetical protein;;	25	2591	2079	865	84	111	104	72	1707	1619	411	3921	4777	2384	1463	1177	3774
CDS	1233620	1235290	1671	-	A11201;CDW43_RS05995gamma-glutamyltransferase;;	15	5723	6235	4966	137	148	244	183	5998	4823	637	6707	9577	5754	4420	3961	10878
CDS	1235287	1236285	999	-	A11202;CDW43_RS06000rhodanese-related sulfurtransferase;;	30	4870	5273	5236	163	130	331	203	6565	5307	893	4694	5886	2901	2804	2797	6434
CDS	1236414	1236827	414	+	A11203;CDW43_RS06005hypothetical protein;;	12	2217	2146	1209	40	86	99	90	1432	1470	401	1855	2166	1095	621	440	2125
CDS	1236829	1237407	579	-	A11204;CDW43_RS06010DUF882 domain-containing protein;;	23	2667	2381	1340	69	86	64	71	1435	1378	327	1891	2663	1406	781	629	2346
CDS	1237478	1238440	963	-	A11205;CDW43_RS06015iron ABC transporter permease;;	29	4192	3546	1742	86	93	169	71	2396	2300	359	1963	2884	1387	1246	948	2474
CDS	1238437	1239210	774	-	A11206;CDW43_RS06020ABC transporter ATP-binding protein;;	6	4544	4067	2676	35	56	71	37	3751	3328	427	2256	3488	2020	1353	1077	3773
CDS	1239203	1240120	918	-	A11207;CDW43_RS06025helical backbone metal receptor;;	15	7537	6262	4995	142	77	121	98	5553	5692	776	3837	5779	3436	2465	1971	5978
CDS	1240188	1240724	537	+	A11208;CDW43_RS06030hypoxanthine-guanine phosphoribosyltransferase;;	12	2680	2324	1188	119	90	184	168	1872	1882	492	2857	4159	2001	1210	1178	3841
CDS	1240721	1241455	735	+	A11209;CDW43_RS06035S-methyl-5'-thioinosine phosphorylase;;	39	5062	5157	2570	133	136	199	149	3607	3668	912	6037	7842	3907	2425	2187	6421
CDS	1241439	1242074	636	-	A11210;CDW43_RS06040CsiV family protein;;	61	11825	13859	5562	393	472	481	339	7305	7950	1795	13450	15805	8039	4047	3877	11892
CDS	1242466	1243389	924	+	A11211;CDW43_RS06050SPFH domain-containing protein;;	81	7125	6903	2679	235	278	453	309	4035	4274	1173	8579	12793	7030	4338	3802	10590
CDS	1243391	1243831	441	+	A11212;CDW43_RS06055NfeD family protein;;	40	3491	2887	1228	54	64	150	115	2410	2316	465	4440	6444	3650	2360	1823	5632
CDS	1243834	1244433	600	+	A11213;CDW43_RS06060histidine phosphatase family protein;;	16	3460	2497	809	49	29	87	62	2747	2399	418	3644	5894	3575	1789	1562	6056
CDS	1244430	1245608	1179	+	A11214;CDW43_RS06065cupin domain-containing protein;;	29	5659	6175	2260	94	63	110	118	4645	4410	678	4444	7281	3869	2747	2491	7545
CDS	1245612	1246124	513	-	A11215;CDW43_RS06070zinc ribbon-containing protein;;	16	5064	4531	1908	138	123	73	89	5047	5417	1381	3524	4364	2227	1442	1341	4364
CDS	1246195	1246680	486	+	A11216;CDW43_RS06075disulfide bond formation protein B;;	66	33352	22414	13265	258	206	405	218	17024	16113	2013	5125	7805	4549	4404	3535	9331
CDS	1246729	1246947	219	-	A11217;CDW43_RS06080translation initiation factor IF-1;;	61	40884	26436	14030	706	713	1078	466	18665	18651	2022	16862	22224	13132	6964	7178	25906
CDS	1246996	1247709	714	-	A11218;CDW43_RS06085arginyltransferase;;	18	4674	3753	1459	86	99	134	60	2888	2556	281	3561	5602	3474	1609	1407	6173
CDS	1247699	1248424	726	-	A11219;CDW43_RS06090leucyl/phenylalanyl-tRNA--protein transferase;;	25	6605	5327	1711	286	275	222	135	3378	3825	531	4652	6585	3856	2016	2080	6898
CDS	1248424	1249602	1179	-	A11220;CDW43_RS06095HDOD domain-containing protein;;	51	27520	15777	3229	265	242	447	244	13694	15065	3882	28901	34480	17895	7789	7218	24273
CDS	1249633	1250232	600	-	A11221;CDW43_RS06100recombination mediator RecR;;	107	12543	10798	3626	212	269	324	298	8738	7900	1530	10252	12362	6586	4484	4052	11390
CDS	1250240	1250548	309	-	A11222;CDW43_RS06105YbaB/EbfC family nucleoid-associated protein;;	80	6919	6382	2403	202	207	346	238	5358	4826	886	5005	6625	3152	3223	2624	5796
CDS	1250567	1252357	1791	-	A11223;CDW43_RS06110DNA polymerase III subunit gamma/tau;;	122	29136	26412	8719	705	685	858	591	14464	16275	2190	14686	22904	12644	9977	8492	21635
CDS	1253087	1254229	1143	+	A11225;CDW43_RS06120tyrosine-type recombinase/integrase;;	2	2569	1366	241	36	21	48	24	2721	2859	399	2731	3622	2076	1338	1080	3653
CDS	1254346	1254945	600	+	A11226;CDW43_RS06125hypothetical protein;;	0	1606	555	19	19	15	30	2	1309	1374	254	3101	3937	2104	1629	1163	4069
CDS	1255002	1255733	732	+	A11227;CDW43_RS06130recombinase family protein;;	0	2227	2361	706	7	25	33	15	1737	1983	499	2392	2838	1312	953	749	2045
CDS	1255763	1255894	132	-	A11228;CDW43_RS16825hypothetical protein;;	0	687	678	190	0	5	4	4	977	939	145	706	939	460	393	325	684
CDS	1256852	1257691	840	-	A11230;CDW43_RS06140type III pantothenate kinase;;	41	13452	14200	6153	268	271	396	264	24079	19353	1350	12918	25472	15115	6629	5829	31415
CDS	1257688	1258491	804	-	A11231;CDW43_RS06145biotin--[acetyl-CoA-carboxylase] ligase;;	43	17778	19306	6893	346	470	454	279	19638	18740	2058	18203	27954	17102	6947	6432	29201
CDS	1258584	1258808	225	-	A11232;CDW43_RS06150hypothetical protein;;	27	11694	8488	1766	303	333	189	102	4143	4573	2354	18646	20767	9740	2513	2089	12193
CDS	1258856	1259221	366	-	A11233;CDW43_RS06155DUF2069 domain-containing protein;;	10	4236	4124	1179	49	61	91	74	2661	2465	405	2291	3226	1692	1087	913	3161
CDS	1259218	1259811	594	-	A11234;CDW43_RS06160NAD(P)H:quinone oxidoreductase;;	33	4721	2979	679	39	13	88	50	3907	3786	475	3951	6232	3321	2087	1824	5550
CDS	1259821	1260171	351	-	A11235;CDW43_RS06165arsenate reductase (glutaredoxin);;	8	3817	3033	1201	24	18	65	26	2841	2611	339	3308	4510	2641	1113	1026	4544
CDS	1260168	1261349	1182	-	A11236;CDW43_RS06170lipopolysaccharide assembly protein LapB;;	22	8093	6237	2245	110	81	215	83	4787	5180	805	6303	8302	4670	2204	1891	7019
CDS	1261358	1261654	297	-	A11237;CDW43_RS06175LapA family protein;;	10	4390	1662	117	70	61	108	76	2530	2571	789	2927	3734	1997	954	706	3014
CDS	1261807	1262130	324	+	A11238;CDW43_RS06180ferredoxin family protein;;	32	14512	11373	4615	424	505	664	558	9438	8907	2120	3689	5493	3144	2172	1791	5969
CDS	1262190	1263050	861	-	A11239;CDW43_RS06185RNA polymerase sigma factor RpoH;;	709	85292	90253	19697	5498	6144	6545	5377	29190	44271	13583	99204	113269	49773	22573	18681	53721
CDS	1263154	1264080	927	-	A11240;CDW43_RS06190permease-like cell division protein FtsX;;	21	7123	7623	1657	78	79	118	82	9530	9328	909	4457	7921	4497	3294	2697	7757
CDS	1264077	1264739	663	-	A11241;CDW43_RS06195cell division ATP-binding protein FtsE;;	28	8822	9358	2248	99	171	174	163	7442	8921	1089	7280	10446	5490	2808	2453	8387
CDS	1264736	1265800	1065	-	A11242;CDW43_RS06200signal recognition particle-docking protein FtsY;;	42	16923	15813	3565	300	347	333	290	11619	15026	2314	14718	18406	8929	4761	3809	12432
CDS	1265864	1267225	1362	+	A11243;CDW43_RS06205pitrilysin family protein;;	170	20970	15420	7734	634	654	1533	918	9910	13590	2732	19855	26953	14018	6015	5032	19761
CDS	1267215	1268516	1302	+	A11244;CDW43_RS06210pitrilysin family protein;;	80	15089	11219	5363	113	134	602	275	8212	9277	1434	18389	27115	15226	5729	4949	21876
CDS	1268500	1269072	573	+	A11245;CDW43_RS0621516S rRNA (guanine(966)-N(2))-methyltransferase RsmD;;	26	5773	5536	2025	106	102	275	159	3630	3966	493	7874	12256	7408	3032	2472	11354
CDS	1269082	1269579	498	+	A11246;CDW43_RS06220pantetheine-phosphate adenylyltransferase;;	15	6946	6729	2662	92	99	184	90	4877	5231	850	6446	9297	5366	1888	1629	8444
CDS	1269628	1269882	255	+	A11247;CDW43_RS06225YfhL family 4Fe-4S dicluster ferredoxin;;	8	5541	4919	2626	102	62	104	77	3831	4165	649	3108	4415	2273	1458	1041	3973
CDS	1269957	1270343	387	+	A11248;CDW43_RS06230H-NS family nucleoid-associated regulatory protein;;	38	11702	12214	5685	521	412	343	148	9389	10180	2606	11037	12758	6493	2852	2371	8809
CDS	1270504	1272957	2454	+	A11249;CDW43_RS06235leucine--tRNA ligase;;	189	21130	24507	10608	388	364	731	389	27962	26985	3510	15974	29690	17460	15868	13809	39018
CDS	1272976	1273461	486	+	A11250;CDW43_RS06240LPS assembly lipoprotein LptE;;	36	3034	3384	1507	75	109	186	132	4380	4088	580	3536	5530	3562	2401	2034	7556
CDS	1273467	1274498	1032	+	A11251;CDW43_RS06245DNA polymerase III subunit delta;;	81	8860	10917	3581	211	189	264	273	8565	9552	1272	8725	13473	8129	7762	6262	16562
CDS	1274528	1275784	1257	+	A11252;CDW43_RS06250glutamate-5-semialdehyde dehydrogenase;;	194	10545	11761	3720	286	295	405	404	10828	11226	1892	15339	23684	12866	12664	10071	24686
CDS	1275765	1276424	660	+	A11253;CDW43_RS06255nicotinate-nucleotide adenylyltransferase;;	38	4103	4971	1500	52	68	87	86	4308	3862	614	4393	6650	4133	3436	2889	7450
CDS	1276431	1277282	852	+	A11254;CDW43_RS06260YdcF family protein;;	64	5410	6824	1564	53	59	101	114	5152	5070	573	6686	9511	5422	3466	3091	10168
CDS	1277316	1277672	357	+	A11255;CDW43_RS06265ribosome silencing factor;;	20	5668	5564	1626	138	141	159	106	6115	5683	1366	5189	6669	2775	2251	1868	6259
CDS	1277669	1278139	471	+	A11256;CDW43_RS0627023S rRNA (pseudouridine(1915)-N(3))-methyltransferase RlmH;;	43	7156	7234	2153	167	142	234	152	6244	6015	1214	6156	7808	3777	3149	2664	7400
CDS	1278136	1278723	588	+	A11257;CDW43_RS06275nucleoside triphosphate pyrophosphatase;;	26	3961	4501	1520	65	42	83	76	4434	4085	568	4248	6536	3696	2172	2022	6987
CDS	1278713	1280185	1473	+	A11258;CDW43_RS06280ribonuclease G;;	31	7634	8772	2421	84	61	108	76	7261	6827	968	5188	7895	3899	2982	2344	7857
CDS	1280188	1283997	3810	+	A11259;CDW43_RS06285YhdP family protein;;	58	12835	14308	4453	162	142	248	207	12460	11620	1607	11346	18758	10874	8192	6459	22022
CDS	1284039	1285481	1443	+	A11260;CDW43_RS06290metalloprotease TldD;;	130	19048	19369	5688	614	478	765	555	14441	16529	2983	23331	31631	14444	10791	8476	24275
CDS	1285481	1286533	1053	+	A11261;CDW43_RS06295tRNA (5-methylaminomethyl-2-thiouridylate)-methyltransferase;;	108	12982	14796	4085	355	328	627	432	12642	12950	1627	21280	30505	16478	10830	8955	26867
CDS	1286530	1286757	228	+	A11262;CDW43_RS06300sulfurtransferase TusA family protein;;	63	8637	9971	3193	156	152	272	215	7783	7825	1371	8174	12644	5831	4569	3723	11596
CDS	1286931	1288340	1410	+	A11263;CDW43_RS06305glutamate--ammonia ligase;;	3241	141698	197732	99568	847	887	1616	3077	55303	54234	11440	60972	93968	52874	34887	32849	97859
CDS	1288437	1289072	636	+	A11264;CDW43_RS06310DUF4124 domain-containing protein;;	48	13383	9740	3249	241	323	194	201	5552	7869	2897	17308	17862	8600	3939	3386	12092
CDS	1289250	1290308	1059	+	A11265;CDW43_RS06315nitrogen regulation protein NR(II);;	209	5319	4860	5471	63	70	97	61	2811	3585	341	4449	6958	3818	1901	1450	6460
CDS	1290313	1291716	1404	+	A11266;CDW43_RS06320nitrogen regulation protein NR(I);;	252	8002	10979	7811	42	65	109	71	2678	2942	490	4785	7679	4079	2725	2401	7833
CDS	1291940	1292386	447	+	A11268;CDW43_RS06330ribosome maturation factor RimP;;	40	35357	23620	17519	201	131	288	116	26867	22666	2107	2994	6444	4627	4036	3740	10583
CDS	1292462	1293976	1515	+	A11269;CDW43_RS06335transcription termination factor NusA;;	83	22201	17250	9352	220	161	453	210	41248	29436	3778	11009	19477	11025	13177	11504	29551
CDS	1293980	1296775	2796	+	A11270;CDW43_RS06340translation initiation factor IF-2;;	274	52534	50865	14314	341	241	426	380	76448	53518	8877	27997	45866	24830	29920	25570	61498
CDS	1296775	1297176	402	+	A11271;CDW43_RS0634530S ribosome-binding factor RbfA;;	97	12315	12440	3248	72	94	99	127	14100	10056	1630	6672	10458	6329	6362	5333	12846
CDS	1297186	1298115	930	+	A11272;CDW43_RS06350tRNA pseudouridine(55) synthase TruB;;	83	17530	19068	4299	221	202	279	225	17699	12398	2232	10895	16814	9442	8214	6657	16796
CDS	1298245	1298514	270	+	A11273;CDW43_RS0635530S ribosomal protein S15;;	44	19751	24699	7857	275	378	406	497	22659	16633	3710	2416	4167	2246	3036	2681	6050
CDS	1298705	1300798	2094	+	A11274;CDW43_RS06360polyribonucleotide nucleotidyltransferase;;	146	50870	47815	19277	654	396	785	969	45007	34311	5070	32902	57570	37190	31383	30581	92873
CDS	1300855	1301625	771	+	A11275;CDW43_RS06365molybdate ABC transporter substrate-binding protein;;	7	13383	12214	5013	444	459	433	330	6473	5874	1212	8080	10771	6110	3299	2955	11112
CDS	1301656	1302291	636	+	A11276;CDW43_RS06370molybdate ABC transporter permease subunit;;	9	5491	5547	2194	94	119	137	118	3131	2628	389	3638	5377	3481	2827	2237	6668
CDS	1302293	1303360	1068	+	A11277;CDW43_RS06375ABC transporter ATP-binding protein;;	10	5163	6078	1840	94	108	113	140	2756	2424	523	4866	7657	4548	3186	2812	8341
CDS	1303483	1304178	696	+	A11278;CDW43_RS06380MotA/TolQ/ExbB proton channel family protein;;	107	13901	17426	1405	109	114	147	83	2423	2348	3961	3029	4344	2646	2070	1702	5005
CDS	1304168	1304566	399	+	A11279;CDW43_RS06385biopolymer transporter ExbD;;	14	5185	7015	884	64	67	67	34	1466	1517	596	1348	1785	1072	658	632	2055
CDS	1304563	1304994	432	+	A11280;CDW43_RS06390biopolymer transporter ExbD;;	17	4109	4743	718	31	26	31	26	1218	1241	259	815	1362	930	401	469	1667
CDS	1304987	1305808	822	+	A11281;CDW43_RS06395energy transducer TonB;;	15	5749	5933	1073	45	43	85	68	1636	1697	251	1448	2331	1430	889	819	2370
CDS	1305870	1306637	768	+	A11282;CDW43_RS06400ATP-binding protein;;	10	4229	4832	1698	71	80	111	79	1736	1905	400	1873	2674	1720	1133	1099	3487
CDS	1306651	1307949	1299	-	A11283;CDW43_RS06405HAMP domain-containing sensor histidine kinase;;	23	8911	10095	4153	119	153	198	240	3000	3532	738	5416	7682	4535	2873	2341	7341
CDS	1307936	1308613	678	-	A11284;CDW43_RS06410response regulator transcription factor;;	7	3945	4732	1710	83	104	120	101	1810	2334	472	1933	2606	1267	1034	796	2060
CDS	1308613	1311768	3156	-	A11285;CDW43_RS06415efflux RND transporter permease subunit;;	6	6155	8528	2458	116	121	160	167	3347	3900	669	3115	4278	2171	1701	1415	3703
CDS	1311761	1312930	1170	-	A11286;CDW43_RS06420efflux RND transporter periplasmic adaptor subunit;;	10	1104	1662	144	29	8	23	19	525	515	117	491	719	366	331	259	717
CDS	1312927	1314297	1371	-	A11287;CDW43_RS06425TolC family protein;;	12	2425	3994	812	70	60	60	56	771	844	214	1071	1284	688	511	457	1266
CDS	1314370	1315590	1221	-	A11288;CDW43_RS06430multidrug effflux MFS transporter;;	16	3397	6485	3070	201	265	237	181	1570	1725	299	1748	2465	1348	942	841	2102
CDS	1316134	1317429	1296	-	A11289;CDW43_RS06440mechanosensitive ion channel family protein;;	30	6049	6633	3392	343	284	437	380	4096	4153	834	3919	5300	3169	2391	1998	5048
CDS	1317795	1319285	1491	+	A11290;CDW43_RS06445SulP family inorganic anion transporter;;	6	2136	1860	1358	148	119	651	1061	6533	4686	394	1049	1657	1011	1531	1268	2548
CDS	1319306	1320166	861	+	A11291;CDW43_RS06450universal stress protein;;	0	2484	2240	874	65	60	163	451	2746	1843	496	1489	2282	1201	813	823	2383
CDS	1320166	1320531	366	+	A11292;CDW43_RS06455TraR/DksA C4-type zinc finger protein;;	0	1117	1103	426	21	19	31	149	581	593	167	807	1133	673	391	354	1148
CDS	1320610	1322667	2058	+	A11293;CDW43_RS06460sensor domain-containing diguanylate cyclase;;	41	7635	5284	3556	363	367	317	532	4102	4770	864	6222	7366	3824	2661	2002	5894
CDS	1323301	1324140	840	+	A11294;CDW43_RS06470type IV toxin-antitoxin system AbiEi family antitoxin;;	30	3828	4359	1560	132	37	69	48	2460	2636	1387	3526	4534	2269	2125	1643	3255
CDS	1324143	1325057	915	+	A11295;CDW43_RS06475nucleotidyl transferase AbiEii/AbiGii toxin family protein;;	23	4078	4880	1391	196	91	136	107	2348	2433	944	5563	7899	4262	3287	2307	5121
CDS	1325221	1326807	1587	+	A11296;CDW43_RS06480peptide chain release factor 3;;	53	14266	17134	5375	189	172	395	297	10110	10839	2291	12887	19987	11097	7327	6928	17674
CDS	1326872	1327321	450	+	A11297;CDW43_RS06485CBS domain-containing protein;;	38	13323	12471	4744	339	373	373	258	8674	9210	2514	9646	11682	5679	4687	3539	9009
CDS	1327400	1327687	288	-	A11298;CDW43_RS06490DUF3579 domain-containing protein;;	16	10844	9903	3593	333	311	311	250	6632	7648	1450	8494	9890	4944	3004	2301	7213
CDS	1328274	1331075	2802	+	A11299;CDW43_RS06495isoleucine--tRNA ligase;;	188	35677	30623	11238	533	409	1027	518	32366	26584	5634	16377	31972	20141	23808	19599	45371
CDS	1331086	1331553	468	+	A11300;CDW43_RS06500signal peptidase II;;	39	4859	4323	1157	67	44	86	61	5844	4829	773	2939	5488	3428	4576	3291	8238
CDS	1331550	1332647	1098	+	A11301;CDW43_RS06505histidinol-phosphate transaminase;;	35	6296	5680	1606	64	92	104	100	7569	5716	1006	5327	9877	6496	7047	5845	13995
CDS	1332644	1333531	888	+	A11302;CDW43_RS06510prephenate dehydrogenase/arogenate dehydrogenase family protein;;	39	2595	2332	600	43	31	28	49	3440	2434	330	3209	6016	3779	5265	4295	10161
CDS	1333551	1334870	1320	+	A11303;CDW43_RS065153-phosphoshikimate 1-carboxyvinyltransferase;;	80	6780	6781	1545	73	81	76	118	9619	7195	1202	7767	13194	7932	10343	8158	17864
CDS	1334863	1335525	663	+	A11304;CDW43_RS06520(d)CMP kinase;;	91	35093	37820	17749	326	269	541	389	20569	15358	2857	8510	13582	6882	6305	5551	15691
CDS	1335635	1337308	1674	+	A11305;CDW43_RS0652530S ribosomal protein S1;;	737	240484	305266	103521	1565	1686	2760	4416	173712	134640	28559	98036	151853	85875	62343	62270	184221
CDS	1337421	1337711	291	+	A11306;CDW43_RS06530integration host factor subunit beta;;	48	20278	23741	8658	82	91	96	93	17671	11897	1768	7761	13197	8515	4414	4395	17263
CDS	1337718	1338104	387	+	A11307;CDW43_RS06535MTH938/NDUFAF3 family protein;;	23	12486	14783	5036	119	116	105	89	9145	6904	950	5196	8447	5770	2739	2784	10962
CDS	1338823	1340244	1422	+	A11308;CDW43_RS06540cytochrome-c oxidase, cbb3-type subunit I;;	285	41192	47660	15245	702	659	1249	1083	29705	29554	6523	40548	56701	30672	18905	16169	45539
CDS	1340255	1340932	678	+	A11309;CDW43_RS06545cytochrome-c oxidase, cbb3-type subunit II;;	65	13951	15288	5013	148	139	418	480	13363	10666	2024	20648	28992	15707	8718	8104	25444
CDS	1340925	1341134	210	+	A11310;CDW43_RS06550cbb3-type cytochrome c oxidase subunit 3;;	20	6281	6207	2339	42	57	109	140	6512	5210	844	7071	10055	5459	2548	2507	8617
CDS	1341127	1342059	933	+	A11311;CDW43_RS06555cytochrome-c oxidase, cbb3-type subunit III;;	39	11110	11560	3895	198	203	260	396	10009	8763	1415	16693	23215	11486	7694	6856	20742
CDS	1342619	1343122	504	+	A11312;CDW43_RS06560FixH family protein;;	29	15951	18033	5051	334	360	345	277	7473	6905	1288	6242	8554	4844	3131	2301	9314
CDS	1343148	1345610	2463	+	A11313;CDW43_RS06565heavy metal translocating P-type ATPase;;	72	25350	30760	8085	471	542	609	394	15301	14184	2466	14769	24112	14181	11131	8852	28777
CDS	1345614	1345823	210	+	A11314;CDW43_RS06570cbb3-type cytochrome oxidase assembly protein CcoS;;	9	4602	3324	2213	52	25	43	22	2587	2270	454	1257	1982	760	690	487	1866
CDS	1345894	1346979	1086	+	A11315;CDW43_RS06575ABC transporter substrate-binding protein;;	39	11723	9947	6124	109	94	187	107	8370	8967	1075	7144	11426	6782	3893	3397	12254
CDS	1347019	1350363	3345	+	A11316;CDW43_RS16830EAL domain-containing protein;;	77	21665	21352	9206	344	385	401	553	16760	14270	1841	11446	20170	12272	9637	7985	25646
CDS	1350342	1350968	627	-	A11317;CDW43_RS06585lytic murein transglycosylase;;	12	2712	3252	1204	37	26	57	45	2383	1854	272	1400	2518	1625	1320	1111	3299
CDS	1350983	1351426	444	-	A11318;CDW43_RS06590D-aminoacyl-tRNA deacylase;;	19	2073	2343	811	35	35	69	75	1608	1350	296	1152	1982	1149	1164	891	2290
CDS	1351423	1352415	993	-	A11319;CDW43_RS06595prolyl aminopeptidase;;	21	3368	3482	1653	110	85	182	200	3258	2926	712	1798	3077	1987	1745	1523	4061
CDS	1352529	1353692	1164	+	A11320;CDW43_RS06600ADP-forming succinate--CoA ligase subunit beta;;	43	9604	6990	5535	213	138	318	162	7580	7676	1247	7114	9501	4237	3915	3490	7899
CDS	1353700	1354572	873	+	A11321;CDW43_RS06605succinate--CoA ligase subunit alpha;;	32	9986	7308	4742	128	83	242	157	6996	5940	1337	7637	12538	6834	6925	5739	12587
CDS	1354572	1356215	1644	+	A11322;CDW43_RS06610NAD+ synthase;;	64	21529	23530	7275	454	496	532	315	14593	12462	2499	18360	27833	15572	10273	9262	28361
CDS	1356224	1356562	339	+	A11323;CDW43_RS06615P-II family nitrogen regulator;;	68	11396	12625	3687	408	428	346	331	6755	6430	1881	8251	10323	5537	3893	3316	8887
CDS	1356584	1357366	783	-	A11324;CDW43_RS06620outer membrane protein assembly factor BamD;;	121	14790	14750	6765	355	278	427	354	12069	11029	1901	6007	9592	5202	4152	3667	9967
CDS	1357837	1359000	1164	+	A11325;CDW43_RS06625L,D-transpeptidase family protein;;	67	16310	16096	9942	353	484	673	608	12988	10509	1885	7620	10539	6080	3176	3266	10863
CDS	1359088	1359387	300	-	A11326;CDW43_RS06630Lpp/OprI family alanine-zipper lipoprotein;;	1787	132442	119402	61278	7298	8442	7310	13422	129567	114736	27678	231465	304021	146720	104737	100099	258937
CDS	1359613	1360407	795	+	A11327;CDW43_RS06635inositol-1-monophosphatase;;	97	11269	10633	5571	602	437	1002	752	16005	13762	1467	6399	10771	5936	5748	4426	11803
CDS	1360472	1362304	1833	+	A11328;CDW43_RS06640translational GTPase TypA;;	189	18294	23017	8405	397	340	785	1228	43315	36379	3888	13275	23035	12771	11171	10023	30338
CDS	1362416	1362634	219	+	A11329;CDW43_RS06645PP0621 family protein;;	12	2320	1949	776	256	321	222	172	1894	1608	329	4200	4875	2447	1634	1271	3516
CDS	1362634	1364229	1596	+	A11330;CDW43_RS06650PAS domain-containing sensor histidine kinase;;	54	11041	9165	3867	301	358	319	279	6597	6533	1237	9600	12160	6070	3845	3052	9235
CDS	1364226	1365581	1356	+	A11331;CDW43_RS06655sigma-54 dependent transcriptional regulator;;	53	14077	13146	4935	329	339	402	290	8919	8497	1539	11889	16293	8295	4965	4372	13063
CDS	1365596	1366504	909	-	A11332;CDW43_RS06660folate-binding protein YgfZ;;	59	8371	8836	2655	227	262	344	310	5148	5468	1612	14464	17261	8317	4086	3411	9865
CDS	1366575	1367018	444	+	A11333;CDW43_RS06665hypothetical protein;;	10	2525	2312	902	83	101	56	37	1205	1112	246	1645	2111	1273	547	507	1753
CDS	1366993	1368594	1602	-	A11334;CDW43_RS06670L-aspartate oxidase;;	82	12667	10921	5278	325	336	378	312	7364	7064	1557	12981	17722	10005	5797	5176	14867
CDS	1368723	1369298	576	+	A11335;CDW43_RS06675RNA polymerase sigma factor RpoE;;	110	24870	23030	9615	1012	1111	1480	942	7098	7717	1738	20939	23901	11613	3689	3204	14868
CDS	1369301	1369870	570	+	A11336;CDW43_RS06680sigma-E factor negative regulatory protein;;	147	26051	23466	11528	610	655	1014	696	7092	8428	2422	32713	36566	17253	5015	4641	20129
CDS	1369874	1370854	981	+	A11337;CDW43_RS06685MucB/RseB C-terminal domain-containing protein;;	129	27299	25941	12604	386	328	984	599	8317	9714	1951	34582	44509	21498	7409	6204	26525
CDS	1370851	1371273	423	+	A11338;CDW43_RS06690SoxR reducing system RseC family protein;;	14	9770	9685	4048	160	197	569	328	3357	3949	549	12446	16426	8214	2538	2230	11145
CDS	1371273	1372700	1428	+	A11339;CDW43_RS06695DegQ family serine endoprotease;;	294	34697	37228	18194	935	1147	1879	1962	13670	15544	2604	46933	71166	37650	14881	12582	57247
CDS	1372878	1373582	705	+	A11340;CDW43_RS06700response regulator transcription factor;;	57	4239	4901	540	21	39	47	40	838	848	1396	1014	1421	845	473	441	1426
CDS	1373579	1374922	1344	+	A11341;CDW43_RS06705sensor histidine kinase;;	85	8392	8329	1728	103	58	97	71	1802	1805	1247	2863	4376	2627	1316	1248	4338
CDS	1375049	1377040	1992	+	A11342;CDW43_RS06710TonB-dependent receptor;;	219	11374	13439	2110	195	211	221	227	2626	2725	1291	4914	6892	3638	2437	2163	6414
CDS	1377111	1378478	1368	-	A11343;CDW43_RS06715MATE family efflux transporter;;	29	3898	3701	1403	135	116	107	80	2789	2584	425	2190	2761	1571	1141	982	2887
CDS	1378744	1380540	1797	+	A11344;CDW43_RS06720translation elongation factor 4;;	105	12342	8873	6187	373	304	451	243	16762	13159	1675	5708	11247	7266	8169	7210	18346
CDS	1380554	1381315	762	+	A11345;CDW43_RS06725signal peptidase I;;	38	3949	2932	1780	102	138	246	153	3459	2123	770	4649	7468	4611	3527	3217	11235
CDS	1381437	1381823	387	+	A11346;CDW43_RS06730DUF4845 domain-containing protein;;	5	2160	1371	916	29	38	62	42	1954	1154	459	2717	4365	2371	1688	1570	6111
CDS	1381820	1382503	684	+	A11347;CDW43_RS06735ribonuclease III;;	26	4634	3541	1687	69	63	167	132	3585	2125	664	5215	7744	4290	2677	2597	9765
CDS	1382500	1383405	906	+	A11348;CDW43_RS06740GTPase Era;;	33	5237	4431	2004	54	79	104	90	5568	2789	921	4071	6822	3774	2820	2509	9737
CDS	1383418	1384137	720	+	A11349;CDW43_RS06745DNA repair protein RecO;;	49	4860	4634	1779	68	122	191	179	4240	2490	616	3726	6610	3881	2767	2311	8982
CDS	1384150	1384881	732	+	A11350;CDW43_RS06750pyridoxine 5'-phosphate synthase;;	91	4759	5202	2317	172	202	311	181	5229	3849	749	4975	7956	4609	3858	3267	9623
CDS	1384878	1385258	381	+	A11351;CDW43_RS06755holo-ACP synthase;;	50	2811	3010	1158	48	65	134	88	2552	1952	418	3128	5367	3260	3049	2444	5861
CDS	1385260	1386147	888	+	A11352;CDW43_RS06760cysteine synthase CysM;;	67	4886	4721	2160	83	79	156	142	5126	3236	769	4728	8169	4806	5223	4020	9679
CDS	1386147	1388204	2058	+	A11353;CDW43_RS06765hypothetical protein;;	21	10413	10532	5347	175	172	296	259	6991	5387	1267	3549	4807	2527	2038	1749	5079
CDS	1388216	1388815	600	+	A11354;CDW43_RS06770YdbL family protein;;	70	10917	12311	7043	769	960	1022	1063	4621	4676	1189	6864	8252	3636	2372	1987	5169
CDS	1388897	1390225	1329	+	A11355;CDW43_RS0677523S rRNA (uracil(1939)-C(5))-methyltransferase RlmD;;	29	11821	9339	5095	353	404	537	330	5069	3454	718	2233	3602	1880	2328	1813	4040
riboswitch	1390371	1390447	77	.	Ribo04;riboswitch c-di-GMP;;	800	87981	49335	88729	3810	2803	2582	6675	18152	9057	3148	1604	2204	1294	4959	3620	2609
CDS	1390465	1391052	588	+	A11356;CDW43_RS16675VPLPA-CTERM sorting domain-containing protein;;	4947	346225	233698	356572	42801	37297	21994	39503	75055	36646	13743	37327	50300	27291	47515	32331	45777
CDS	1391135	1392277	1143	+	A11357;CDW43_RS06785DNA alkylation repair protein;;	31	5363	4843	3025	167	147	228	164	6174	5041	830	4284	5327	2703	1602	1324	4219
CDS	1392359	1394716	2358	-	A11358;CDW43_RS06790phosphoenolpyruvate synthase;;	177	48699	51721	13653	882	690	919	644	50100	51759	10009	47276	69213	36280	29747	25517	60357
CDS	1394722	1395612	891	-	A11359;CDW43_RS06795pyruvate, water dikinase regulatory protein;;	30	22516	24941	7364	1007	1281	784	498	26852	28319	4300	21710	24830	12998	7588	6861	19125
CDS	1396489	1396635	147	+	A11360;CDW43_RS06800S24 family peptidase;;	5	1187	1192	542	18	17	25	13	868	920	158	1190	1703	1029	385	331	1750
CDS	1396713	1397558	846	-	A11361;CDW43_RS06805UTP--glucose-1-phosphate uridylyltransferase GalU;;	45	7555	7474	3292	208	244	252	244	4942	5830	1177	10470	13219	7490	3376	2835	11141
CDS	1397881	1398246	366	+	A11362;CDW43_RS06810hypothetical protein;;	7	3781	3557	1373	145	220	186	159	1800	2281	440	3681	4171	1918	880	761	2725
CDS	1398528	1399634	1107	+	A11363;CDW43_RS06815PQQ-binding-like beta-propeller repeat protein;;	81	11154	12939	4833	233	212	367	411	6546	8256	1467	7837	10987	5226	4015	2847	7573
CDS	1400261	1401118	858	-	A11364;CDW43_RS06820UTP--glucose-1-phosphate uridylyltransferase GalU;;	67	10248	10426	3509	352	476	911	1378	6883	6869	1826	6948	12338	7416	5417	5218	15390
CDS	1401367	1402347	981	+	A11365;CDW43_RS06825UDP-glucose 4-epimerase GalE;;	16	12721	15252	3718	253	268	484	559	9726	9776	2436	13261	19824	10210	4688	4398	17944
CDS	1402363	1403763	1401	+	A11366;CDW43_RS06830mannose-1-phosphate guanylyltransferase/mannose-6-phosphate isomerase;;	46	10719	10921	2816	306	406	667	1246	9183	9121	2054	15646	23568	13308	6126	5439	22132
CDS	1403791	1405194	1404	+	A11367;CDW43_RS06835undecaprenyl-phosphate glucose phosphotransferase;;	28	13418	13497	3381	289	288	291	711	12696	13061	1575	10011	15881	8844	4370	3733	15991
riboswitch	1405201	1405394	194	.	Ribo05-ext;riboswitch c-di-GMP;;	494	443055	274702	12746	4593	3501	2034	5672	565191	547711	78903	278165	380686	168305	158560	136685	240173
CDS	1405423	1405947	525	+	A11368;CDW43_RS06840hypothetical protein;;	2735	1112668	664310	43908	19607	14573	7272	27217	1415116	1332757	197592	896878	1155725	547645	537417	420974	825651
riboswitch	1406231	1406316	86	.	Ribo06;riboswitch c-di-GMP;;	67	2053	1067	760	3575	5525	5410	21228	2117	2306	243	528	1229	428	380	324	924
CDS	1406345	1406875	531	+	A11369;CDW43_RS06845hypothetical protein;;	953	24125	9239	9528	17853	23409	24392	92191	10234	11153	1727	3541	6348	2456	2706	1950	4653
riboswitch	1407172	1407256	85	.	Ribo07;riboswitch c-di-GMP;;	1189	269238	158167	207351	14314	10647	8356	10089	12609	6229	3140	12343	15521	6759	14559	10356	11195
CDS	1407285	1407809	525	+	A11370;CDW43_RS06850PEP-CTERM domain protein;;	5662	1014388	583564	701504	73283	52239	41221	48009	63240	28829	15121	56234	68619	30829	75409	51177	51371
CDS	1408369	1408920	552	+	A11371;CDW43_RS06855polysaccharide biosynthesis/export family protein;;	37	20103	16252	10421	453	483	549	419	10056	10753	3597	9629	12142	6322	3033	2804	10547
CDS	1408959	1410143	1185	+	A11372;CDW43_RS06860autotransporter domain-containing protein;;	90	32765	27356	14601	334	361	593	468	15920	15357	2783	25845	34356	17982	6479	5955	25345
CDS	1410159	1411919	1761	+	A11373;CDW43_RS06865Wzz/FepE/Etk N-terminal domain-containing protein;;	26	21283	18217	8126	228	218	302	260	13362	12192	2181	25722	39252	22783	7971	7273	36795
CDS	1411954	1412790	837	+	A11374;CDW43_RS06870polysaccharide biosynthesis tyrosine autokinase;;	38	10074	9261	2949	38	73	83	84	7219	6290	1018	10593	18758	11100	4728	4545	20400
CDS	1412794	1413684	891	+	A11375;CDW43_RS06875AAA family ATPase;;	15	9172	8742	2245	58	44	69	55	7379	6148	678	7230	12445	7318	3287	3192	13223
CDS	1414040	1415932	1893	+	A11376;CDW43_RS06880hypothetical protein;;	29	75540	64106	27797	936	983	970	1195	21170	21873	8731	51538	69008	38250	16943	15578	72474
CDS	1416236	1417141	906	+	A11377;CDW43_RS06885putative nucleotide-diphospho-sugar transferase;;	0	17661	19457	9117	353	463	344	136	10465	11524	2518	10572	13263	7013	3047	2829	12933
CDS	1417254	1418156	903	-	A11378;CDW43_RS06890glycosyltransferase;;	6	20399	38038	22782	346	362	280	159	13150	12168	1877	9983	14117	8146	3637	3462	14588
CDS	1418159	1419526	1368	-	A11379;CDW43_RS06895oligosaccharide flippase family protein;;	3	24454	44937	26115	738	850	615	312	14928	14830	2360	11025	13987	8343	3840	3124	12915
CDS	1419570	1420724	1155	+	A11380;CDW43_RS06900glycosyltransferase family 4 protein;;	16	21848	45413	20599	699	829	620	330	14983	15062	1943	10723	14952	8676	4684	3908	15203
CDS	1420721	1421632	912	+	A11381;CDW43_RS06905NAD-dependent epimerase/dehydratase family protein;;	50	23471	45780	19177	1796	2176	1511	679	10779	11481	1905	16160	20839	10748	5745	5093	17385
CDS	1421654	1423027	1374	+	A11382;CDW43_RS06910hypothetical protein;;	0	12114	28262	11917	268	273	336	87	7894	7528	857	6360	10570	7314	3905	3517	13566
CDS	1423143	1424219	1077	+	A11383;CDW43_RS06915glycosyltransferase;;	4	6251	17016	6679	101	84	124	65	6997	6068	711	2878	4678	3393	2061	2102	7619
CDS	1424216	1425196	981	+	A11384;CDW43_RS06920glycosyltransferase family 2 protein;;	28	9171	21581	9457	267	336	241	136	6960	6231	788	5488	7960	5181	3079	2761	10149
CDS	1425177	1426055	879	+	A11385;CDW43_RS06925sulfotransferase;;	7	4980	11830	4994	86	97	133	107	4026	3547	443	2572	4360	3120	1663	1533	6426
CDS	1426052	1426582	531	+	A11386;CDW43_RS16680serine acetyltransferase;;	13	2509	5588	2175	97	93	180	166	1510	1353	196	2282	3716	2452	2006	1678	5335
CDS	1426579	1427574	996	+	A11387;CDW43_RS06935glycosyltransferase;;	32	8583	15481	6596	156	167	242	296	5465	4833	663	7719	11343	6682	4066	3592	12126
CDS	1427581	1428807	1227	-	A11388;CDW43_RS06940glycosyltransferase family 39 protein;;	20	19065	23793	9824	391	427	449	325	10126	10941	2513	15478	17428	9419	3588	3395	12170
CDS	1428893	1430323	1431	+	A11389;CDW43_RS06945UbiA family prenyltransferase;;	33	19831	24109	8901	236	317	438	408	13729	13228	2478	9633	13847	8020	3389	3071	12226
CDS	1430320	1430679	360	+	A11390;CDW43_RS06950SMR family transporter;;	1	9688	9934	4438	197	259	222	170	6689	6036	969	4931	7399	4539	2402	2128	8106
CDS	1430720	1431637	918	+	A11391;CDW43_RS06955glycosyltransferase;;	8	10234	13115	4125	219	218	317	268	6746	6566	1352	11524	17521	9658	4349	3872	16652
CDS	1431685	1432890	1206	+	A11392;CDW43_RS06960glycosyltransferase family 4 protein;;	6	6640	8656	2679	252	230	263	205	3527	3516	738	10420	15375	8633	4295	3982	15504
CDS	1432904	1434841	1938	+	A11393;CDW43_RS06965asparagine synthase (glutamine-hydrolyzing);;	6	8743	13052	3080	151	124	189	152	5839	5608	891	11616	19294	11797	5313	4985	21417
CDS	1435293	1436417	1125	+	A11394;CDW43_RS06970polysaccharide biosynthesis/export family protein;;	12	26455	29719	9900	637	652	585	379	10102	12366	3491	20604	22375	12345	4853	4257	16969
CDS	1436436	1437776	1341	+	A11395;CDW43_RS06975GNVR domain-containing protein;;	4	17867	17061	7177	136	110	168	105	7626	7688	1577	11266	16276	9070	4706	4167	13606
CDS	1437773	1438417	645	+	A11396;CDW43_RS06980CpsD/CapB family tyrosine-protein kinase;;	10	9595	10555	2703	145	133	166	159	5314	5202	954	15419	25342	14169	8068	6875	22306
CDS	1438668	1440176	1509	+	A11397;CDW43_RS06985O-antigen ligase family protein;;	18	10525	10663	4036	109	91	161	153	5831	5310	690	7535	12795	7132	3342	2734	13274
CDS	1440180	1441607	1428	+	A11398;CDW43_RS06990oligosaccharide flippase family protein;;	17	6663	6448	2601	152	154	133	207	3613	3673	440	7207	11648	6824	3787	3257	14639
CDS	1441615	1442712	1098	+	A11399;CDW43_RS06995glycosyltransferase family 4 protein;;	24	8534	8251	3032	165	156	126	202	4584	4433	796	12157	19204	11296	6271	4709	20203
CDS	1442709	1443290	582	+	A11400;CDW43_RS07000hypothetical protein;;	9	5169	5663	2288	85	110	72	85	2629	2324	367	6329	10009	5806	3334	2541	10031
CDS	1443287	1443865	579	+	A11401;CDW43_RS07005serine acetyltransferase;;	9	5672	5971	2065	145	184	143	137	2732	2536	376	8814	14058	8393	3537	3173	14066
CDS	1443865	1444812	948	+	A11402;CDW43_RS07010glycosyltransferase family 2 protein;;	5	14469	14249	5260	248	274	211	182	6326	6450	995	12542	20007	12389	5479	4570	22749
CDS	1444869	1445972	1104	+	A11403;CDW43_RS07015glycosyltransferase family 1 protein;;	14	13866	13922	5736	240	198	199	190	6045	6170	1106	11219	15968	9564	4507	3873	16062
CDS	1445976	1446812	837	+	A11404;CDW43_RS07020class I SAM-dependent methyltransferase;;	7	9163	8348	3649	120	112	144	124	4025	4213	725	9430	13805	8012	3613	3164	13598
CDS	1446851	1448416	1566	+	A11405;CDW43_RS07025hypothetical protein;;	34	16190	15862	5852	389	351	383	310	6439	6790	1523	19415	26379	14312	5766	5117	23515
CDS	1448467	1449633	1167	+	A11406;CDW43_RS07030DUF1972 domain-containing protein;;	8	17545	16998	6619	325	360	396	407	7601	7729	1724	14623	18582	10555	4094	3642	17164
CDS	1450093	1451196	1104	+	A11407;CDW43_RS07035WecB/TagA/CpsF family glycosyltransferase;;	12	12093	11271	4916	151	138	275	328	6485	6212	965	9242	13336	7879	2912	2769	13910
CDS	1451236	1452762	1527	+	A11408;CDW43_RS07040VPLPA-CTERM-specific exosortase XrtD;;	38	23117	19249	7621	1012	1241	987	657	9087	9377	2310	26407	37929	20277	8974	7985	35697
CDS	1452779	1455160	2382	+	A11409;CDW43_RS07045tetratricopeptide repeat protein;;	26	39924	32366	13717	447	339	821	716	22592	21050	4365	40766	57512	30313	12060	11106	55300
CDS	1455233	1455760	528	-	A11410;CDW43_RS07050cytochrome b;;	3	4345	2864	1962	69	90	124	116	1798	1433	1251	1554	2322	1218	1038	782	2631
CDS	1455891	1456832	942	-	A11411;CDW43_RS07055LysR family transcriptional regulator;;	4	2746	3240	935	66	79	115	67	2686	2840	597	1793	2310	1136	916	686	1802
CDS	1456951	1458366	1416	+	A11412;CDW43_RS07060acetyl-CoA carboxylase biotin carboxylase subunit;;	83	9156	4966	3667	369	329	682	198	32626	27448	1159	2790	4708	2521	3409	2910	4922
CDS	1458390	1460180	1791	+	A11413;CDW43_RS07065sodium-extruding oxaloacetate decarboxylase subunit alpha;;	31	7720	4554	2856	55	75	309	85	6932	3889	838	4162	7964	3885	3579	3414	8956
CDS	1460292	1461383	1092	-	A11414;CDW43_RS07070acyltransferase;;	2	6440	9771	5152	308	228	177	97	5187	4481	880	5636	6729	3499	1445	1381	6090
CDS	1462172	1463347	1176	+	A11415;CDW43_RS07080aminotransferase class I/II-fold pyridoxal phosphate-dependent enzyme;;	93	3002	4046	1216	104	117	360	500	3313	3537	747	4927	6376	3225	1924	1492	4911
CDS	1463594	1463893	300	+	A11416;CDW43_RS07085hypothetical protein;;	2	1973	2233	774	63	66	45	57	2255	2574	315	802	1050	582	357	366	1193
CDS	1463890	1464555	666	-	A11417;CDW43_RS07090hypothetical protein;;	2	2096	2763	1037	102	70	60	315	2009	2190	302	948	1400	725	449	466	1320
CDS	1464623	1465450	828	-	A11418;CDW43_RS07095phosphate ABC transporter ATP-binding protein PstB;;	0	1491	1768	616	127	147	92	1069	841	856	246	972	1700	633	367	291	1054
CDS	1465465	1466364	900	-	A11419;CDW43_RS07100phosphate ABC transporter permease PstA;;	3	564	671	312	142	153	378	1198	276	337	140	336	723	236	197	185	449
CDS	1466361	1467266	906	-	A11420;CDW43_RS07105phosphate ABC transporter permease subunit PstC;;	0	626	707	283	183	214	1061	1849	382	400	252	505	1300	358	213	258	654
CDS	1467469	1468527	1059	-	A11421;CDW43_RS07110phosphate ABC transporter substrate-binding protein PstS;;	4	2544	2255	1363	3008	3050	16390	17290	1082	1207	971	753	4438	443	432	411	1205
CDS	1468840	1470612	1773	-	A11422;CDW43_RS07115methanol/ethanol family PQQ-dependent dehydrogenase;;	19	5943	8156	2165	246	260	312	621	9993	14834	946	4669	5463	2802	2332	1768	4439
CDS	1471177	1471821	645	+	A11424;CDW43_RS07125hypothetical protein;;	6	4143	3862	1845	46	48	72	58	2339	2021	363	1905	2621	1402	736	658	2233
CDS	1471908	1473095	1188	-	A11425;CDW43_RS07130pyridoxal phosphate-dependent aminotransferase;;	161	22559	22900	9408	541	601	671	482	18747	18622	3397	13531	18165	10215	6384	5765	19957
CDS	1473168	1475180	2013	+	A11426;CDW43_RS07135excinuclease ABC subunit UvrB;;	47	9132	10665	2964	193	206	296	190	6432	9443	1933	10541	14936	7953	4752	3917	11823
CDS	1475436	1477361	1926	+	A11428;CDW43_RS07145threonine--tRNA ligase;;	249	84384	71118	43281	3288	2449	4077	2598	85810	74954	8797	27625	39296	19671	15446	13776	40711
CDS	1477366	1477884	519	+	A11429;CDW43_RS07150translation initiation factor IF-3;;	328	113979	111167	70753	1897	1834	3491	2359	126210	110988	14279	39451	64358	34399	16514	17991	69267
CDS	1477917	1478114	198	+	A11430;CDW43_RS0715550S ribosomal protein L35;;	120	33816	38218	16483	611	607	1133	1008	39993	31764	5609	21711	38254	23297	10442	11382	40875
CDS	1478130	1478489	360	+	A11431;CDW43_RS0716050S ribosomal protein L20;;	133	40367	47343	17808	780	518	997	1015	46145	37638	7138	19409	36657	20598	17605	14897	42869
CDS	1478593	1479630	1038	+	A11432;CDW43_RS07165phenylalanine--tRNA ligase subunit alpha;;	79	10292	12292	3701	94	82	194	174	16808	15950	2494	6702	12588	8234	7425	6857	16992
CDS	1479646	1482021	2376	+	A11433;CDW43_RS07170phenylalanine--tRNA ligase subunit beta;;	114	29017	36001	8461	851	676	784	599	28891	25232	4978	22998	34558	20350	21708	18866	44998
CDS	1482054	1482350	297	+	A11434;CDW43_RS07175integration host factor subunit alpha;;	92	33408	44921	12403	1002	725	926	841	16842	18373	4353	18270	20957	9701	5886	5084	16661
CDS	1482334	1482696	363	+	A11435;CDW43_RS07180MerR family transcriptional regulator;;	187	31588	44940	13000	982	736	1039	1291	14936	16900	3810	26469	32621	15564	8757	7738	23655
CDS	1482883	1483929	1047	+	A11437;CDW43_RS07190NADP(H)-dependent aldo-keto reductase;;	25	7201	7962	3751	117	124	208	105	6371	6528	771	4351	6966	4266	2157	2133	8023
CDS	1484087	1486201	2115	+	A11438;CDW43_RS07195EAL domain-containing protein;;	44	27213	19458	4887	301	279	311	329	13100	14855	2777	33477	50347	27557	6876	6125	39087
CDS	1486198	1486788	591	-	A11439;CDW43_RS07200MarR family transcriptional regulator;;	27	23193	25614	2865	111	233	217	156	5376	6687	1519	27645	37807	18942	2370	2082	13409
CDS	1487079	1487600	522	+	A11440;CDW43_RS07205diaminobutyrate acetyltransferase;;	41	28553	34633	2854	154	199	265	373	10022	12877	3515	31169	42685	18824	2536	2130	11946
CDS	1487645	1489006	1362	+	A11441;CDW43_RS07210diaminobutyrate--2-oxoglutarate transaminase;;	151	46310	77376	5816	285	299	497	1390	58042	62468	7263	72204	93922	43364	9198	8769	31342
CDS	1489087	1489491	405	+	A11442;CDW43_RS07215ectoine synthase;;	98	11208	19894	1664	124	109	159	455	20102	19133	1498	26159	34866	16454	3374	2885	11604
CDS	1489549	1490991	1443	+	A11443;CDW43_RS07220aspartate kinase;;	62	21869	37293	3975	180	237	248	792	35784	35340	2224	43325	57013	25363	5142	4701	19305
CDS	1490976	1491884	909	+	A11444;CDW43_RS07225hypothetical protein;;	20	12066	21196	2336	57	68	59	239	24385	22129	1044	16919	21850	10972	2067	2150	8479
CDS	1491909	1492445	537	-	A11445;CDW43_RS07230chalcone isomerase family protein;;	9	5238	10293	2100	66	41	73	111	9320	8148	365	5522	7175	4325	1240	1055	4591
CDS	1492442	1492933	492	-	A11446;CDW43_RS07235nuclear transport factor 2 family protein;;	5	2811	4088	1526	53	40	87	110	3080	3652	352	1583	2145	1313	727	579	2549
CDS	1493278	1494210	933	+	A11447;CDW43_RS07240acyl-CoA desaturase;;	6	3504	3859	1631	81	94	104	136	2864	3012	452	2427	2812	1170	959	733	2282
CDS	1494207	1495469	1263	+	A11448;CDW43_RS07245FAD-dependent oxidoreductase;;	6	5154	5123	2239	128	168	222	214	3498	4062	616	4943	5991	2845	1879	1522	5068
CDS	1495459	1496247	789	+	A11449;CDW43_RS07250DUF1365 domain-containing protein;;	9	2130	2069	910	68	67	49	124	1526	1666	362	2689	3437	1605	1043	878	2472
CDS	1496244	1497506	1263	+	A11450;CDW43_RS07255cyclopropane-fatty-acyl-phospholipid synthase family protein;;	21	5602	3851	1270	174	239	208	205	2622	3551	952	5136	6194	2654	2284	1797	4401
CDS	1497499	1498041	543	+	A11451;CDW43_RS07260DUF2878 domain-containing protein;;	2	1912	1546	399	50	46	56	77	1176	1269	299	1364	1845	839	722	504	1449
CDS	1498028	1498792	765	+	A11452;CDW43_RS07265DUF1295 domain-containing protein;;	4	1984	1710	529	55	27	39	52	1178	1375	217	1641	2145	1203	895	649	1925
CDS	1498789	1499823	1035	+	A11453;CDW43_RS07270cyclopropane-fatty-acyl-phospholipid synthase family protein;;	12	3273	3108	1442	50	69	80	61	2672	3045	374	2018	2882	1439	926	736	2818
CDS	1499828	1501129	1302	+	A11454;CDW43_RS07275HAMP domain-containing sensor histidine kinase;;	22	10485	8725	4346	165	231	261	179	5096	5871	1045	5170	6526	3215	1885	1681	5283
CDS	1501142	1501840	699	-	A11455;CDW43_RS07280response regulator transcription factor;;	48	6421	5923	1646	204	251	283	246	2663	3441	1002	6825	7420	3283	2123	1946	4447
CDS	1502001	1502219	219	+	A11456;CDW43_RS07285(2Fe-2S)-binding protein;;	293	26597	28654	511	91	96	110	140	985	1303	4217	1416	1941	993	867	595	1129
CDS	1502495	1502974	480	+	A11457;CDW43_RS07290bacterioferritin;;	92	35518	44467	13534	1446	1777	1561	2801	18243	20071	4291	38008	35899	14325	5945	4735	20783
CDS	1503640	1504671	1032	+	A11459;CDW43_RS07300tRNA preQ1(34) S-adenosylmethionine ribosyltransferase-isomerase QueA;;	43	9452	11616	3799	365	385	375	268	11837	11390	1432	6066	9055	5339	4428	3959	9405
CDS	1504987	1505730	744	+	A11460;CDW43_RS07305RNA methyltransferase;;	70	7410	11222	1712	444	252	367	221	5537	7666	2094	5208	7988	4696	5875	4344	8487
CDS	1505727	1506521	795	+	A11461;CDW43_RS07310serine O-acetyltransferase;;	70	4781	5570	969	325	136	269	170	2347	4512	989	6122	9048	4761	5704	4240	9523
CDS	1506572	1507021	450	+	A11462;CDW43_RS07315Rrf2 family transcriptional regulator;;	123	72030	56730	4150	1159	1828	965	976	7161	14231	8775	32132	35051	16605	3672	2896	10149
CDS	1507040	1508182	1143	+	A11463;CDW43_RS07320cysteine desulfurase family protein;;	176	85199	83470	5598	1224	1226	1044	966	15958	29827	8000	40788	46328	21722	5734	4545	14595
CDS	1508187	1508519	333	+	A11464;CDW43_RS07325iron-sulfur cluster assembly accessory protein;;	49	33630	39684	5163	524	440	583	747	8273	12211	2327	8610	9669	4314	1605	1188	3921
CDS	1508614	1509918	1305	+	A11465;CDW43_RS07330adenosylmethionine--8-amino-7-oxononanoate transaminase;;	75	15843	17571	4178	348	288	521	544	5886	6185	1201	9194	13968	6783	3205	2796	8834
CDS	1510033	1510104	72	+	A11466;CDW43_RS07335pyrroloquinoline quinone precursor peptide PqqA;;	12	964	876	360	71	181	179	225	372	360	112	1492	2819	1933	2186	1156	2270
CDS	1510282	1510848	567	+	A11467;CDW43_RS07340alkyl hydroperoxide reductase subunit C;;	248	25873	31360	34748	406	381	846	558	42230	41204	24968	73898	84590	43695	18951	18747	67661
CDS	1510988	1512565	1578	+	A11468;CDW43_RS07345alkyl hydroperoxide reductase subunit F;;	77	13486	12138	20441	101	88	354	160	14291	12394	4471	17075	19806	9297	4638	4067	12651
CDS	1512590	1513258	669	-	A11469;CDW43_RS07350response regulator transcription factor;;	25	3433	3066	3567	53	87	98	57	2906	2923	512	2859	3844	2216	1039	1011	3145
CDS	1513251	1514633	1383	-	A11470;CDW43_RS07355histidine kinase;;	6	4549	4390	2174	88	83	115	81	2226	2793	484	2927	3421	1917	843	868	2760
CDS	1515071	1516090	1020	+	A11471;CDW43_RS07360MoxR family ATPase;;	74	5689	5119	2919	312	389	384	269	3043	3256	1226	5557	7932	3967	3779	3109	7758
CDS	1516103	1516987	885	+	A11472;CDW43_RS07365hypothetical protein;;	114	4337	3193	2210	106	155	290	182	2128	2186	720	6270	10577	6492	4451	3505	11659
CDS	1517047	1517838	792	+	A11473;CDW43_RS07370hypothetical protein;;	81	2999	2966	1402	87	85	242	164	1834	2120	528	3977	6931	3996	3408	2259	8322
CDS	1517835	1518851	1017	+	A11474;CDW43_RS07375VWA domain-containing protein;;	43	3233	2413	1799	22	36	114	83	2100	1923	425	3187	5554	3535	2128	2067	7114
CDS	1518844	1519383	540	+	A11475;CDW43_RS07380MxaK-like protein;;	16	2446	2012	1128	43	24	67	43	1367	1279	259	2367	3860	2332	1483	1219	4754
CDS	1519380	1520318	939	+	A11476;CDW43_RS07385VWA domain-containing protein;;	24	3593	2850	1809	130	106	114	147	1899	1901	321	4112	6699	4565	2182	2033	8792
CDS	1520775	1521260	486	+	A11477;CDW43_RS07390L,D-transpeptidase;;	24	3923	4331	1583	59	95	107	54	2936	3198	577	4410	5952	3227	1740	1612	5315
CDS	1521270	1522319	1050	+	A11478;CDW43_RS07395beta-N-acetylhexosaminidase;;	59	6507	6878	3203	81	102	219	117	7271	6306	903	6417	9861	5861	4797	4314	10418
CDS	1522395	1525880	3486	+	A11479;CDW43_RS07400DNA polymerase III subunit alpha;;	104	13294	14459	4640	151	134	185	211	13322	12376	1409	13967	21971	11836	10101	7877	23955
CDS	1525967	1527064	1098	+	A11480;CDW43_RS07405PilT/PilU family type 4a pilus ATPase;;	144	14936	21788	4411	395	355	305	591	7167	7363	2058	22734	31638	16795	10284	8404	26998
CDS	1527322	1528278	957	+	A11481;CDW43_RS07410acetyl-CoA carboxylase carboxyltransferase subunit alpha;;	171	17053	15419	7060	519	593	781	698	11418	13234	2858	18285	22708	10115	6210	5608	14271
CDS	1528299	1529627	1329	+	A11482;CDW43_RS07415tRNA lysidine(34) synthetase TilS;;	17	6267	4373	2940	84	57	162	109	5156	4430	445	2702	4431	2711	2451	1956	4992
CDS	1529733	1531370	1638	+	A11483;CDW43_RS07420CTP synthase;;	268	28953	32640	13226	787	518	985	685	39901	31703	3543	16268	28358	18114	14793	12782	40658
CDS	1531370	1532206	837	+	A11484;CDW43_RS074253-deoxy-8-phosphooctulonate synthase;;	95	10826	12583	4149	155	130	237	233	14449	10668	1516	6787	11793	7473	6478	5361	16414
CDS	1532267	1533547	1281	+	A11485;CDW43_RS07430phosphopyruvate hydratase;;	107	15687	19213	4867	158	108	261	302	19235	15722	3007	10660	17569	9536	9655	8144	21517
CDS	1533558	1533845	288	+	A11486;CDW43_RS07435cell division protein FtsB;;	10	2902	3585	874	31	48	90	87	3577	2793	456	4052	7163	4327	2914	2935	8991
CDS	1533835	1534545	711	+	A11487;CDW43_RS074402-C-methyl-D-erythritol 4-phosphate cytidylyltransferase;;	31	4367	5555	1280	43	47	108	120	5454	4146	574	4804	9102	5512	3919	3805	11326
CDS	1534542	1535024	483	+	A11488;CDW43_RS074452-C-methyl-D-erythritol 2,4-cyclodiphosphate synthase;;	21	2478	2698	995	59	69	71	70	3120	2419	305	2258	4089	2588	2154	1733	5370
CDS	1535021	1536097	1077	+	A11489;CDW43_RS07450tRNA pseudouridine(13) synthase TruD;;	15	4220	4669	1950	54	53	62	98	7079	4948	482	2824	5111	2861	2449	1982	6696
CDS	1536126	1536899	774	+	A11490;CDW43_RS07455DUF1223 domain-containing protein;;	22	3406	3659	1386	38	51	83	105	3996	3041	464	2848	4147	2109	1458	1351	4810
CDS	1536907	1538301	1395	+	A11491;CDW43_RS07460siroheme synthase CysG;;	53	6838	5725	2074	123	137	165	153	6672	5653	1053	7900	10616	5929	3264	3190	11718
CDS	1538444	1540789	2346	+	A11492;CDW43_RS07465TonB-dependent receptor;;	239	17003	8622	1500	736	540	551	332	18112	56367	11165	58196	89563	54081	30294	26660	110143
CDS	1540838	1541686	849	-	A11493;CDW43_RS07470carboxylating nicotinate-nucleotide diphosphorylase;;	19	3973	4116	1683	84	115	126	126	3398	3293	569	1239	2101	1244	1194	1128	2930
CDS	1541772	1542323	552	+	A11494;CDW43_RS074751,6-anhydro-N-acetylmuramyl-L-alanine amidase AmpD;;	16	2943	3049	1203	95	108	133	89	1853	1904	406	3145	3800	1881	964	716	2626
CDS	1542367	1542990	624	-	A11495;CDW43_RS07480FKBP-type peptidyl-prolyl cis-trans isomerase;;	66	19448	20297	8851	371	382	732	806	19850	17753	2406	19246	27358	13456	8045	7409	30478
NCodB	1543101	1543500	400	.	Ncod172;Ncod400Ncod;;	2514	91301	207065	29769	4904	4577	2111	5430	64331	80886	9681	103251	152058	58548	88904	59502	70522
CDS	1543598	1544086	489	+	A11496;CDW43_RS07490SUF system Fe-S cluster assembly regulator;;	187	37167	42356	4555	2268	2264	1458	853	10857	17617	11102	14431	16475	7836	2835	2342	7057
CDS	1544079	1545527	1449	+	A11497;CDW43_RS07495Fe-S cluster assembly protein SufB;;	594	106218	116388	9860	2851	2757	2667	1227	37005	60496	22575	40307	49344	22640	7545	6944	21799
CDS	1545609	1546376	768	+	A11498;CDW43_RS07500Fe-S cluster assembly ATPase SufC;;	286	49729	59603	2974	283	251	988	407	18288	29547	7719	17686	23587	10543	3460	3349	9398
CDS	1546373	1547677	1305	+	A11499;CDW43_RS07505Fe-S cluster assembly protein SufD;;	473	75528	86237	4223	265	303	1108	669	32430	50413	12401	32162	44193	22573	6965	6620	20102
CDS	1547670	1548893	1224	+	A11500;CDW43_RS07510cysteine desulfurase;;	414	63418	60160	2088	164	169	325	363	25717	38739	7865	29698	40763	20705	8090	7288	19935
CDS	1548893	1549339	447	+	A11501;CDW43_RS07515SUF system NifU family Fe-S cluster assembly protein;;	111	20216	20652	1538	22	51	24	101	8816	11411	2264	9730	13185	6256	2458	2150	6536
CDS	1549343	1549678	336	+	A11502;CDW43_RS07520SUF system Fe-S cluster assembly protein;;	34	27360	33296	7053	74	78	71	216	9278	10783	2062	6644	9560	4697	1976	1944	5435
CDS	1549987	1551714	1728	-	A11503;CDW43_RS07525O-antigen ligase family protein;;	2	6530	7746	1974	111	139	195	68	3567	4095	581	2428	2940	1626	1002	831	2847
CDS	1551704	1552810	1107	-	A11504;CDW43_RS07530hypothetical protein;;	0	787	889	444	2	5	41	13	538	679	116	473	612	392	341	281	814
CDS	1552816	1554870	2055	-	A11505;CDW43_RS07535DUF3438 family protein;;	6	3101	3022	1503	62	73	76	88	2174	2841	529	2043	2556	1581	790	662	2373
CDS	1554871	1555347	477	-	A11506;CDW43_RS07540hypothetical protein;;	0	331	379	229	10	20	21	6	400	489	64	235	318	204	128	85	395
CDS	1555352	1556584	1233	-	A11507;CDW43_RS07545type II secretion system F family protein;;	4	797	828	516	12	22	6	25	808	1001	131	567	833	360	269	230	721
CDS	1556584	1558212	1629	-	A11508;CDW43_RS07550GspE/PulE family protein;;	0	948	937	592	24	18	24	26	635	699	149	626	940	494	374	370	1061
CDS	1558215	1559306	1092	-	A11509;CDW43_RS07555PilT/PilU family type 4a pilus ATPase;;	0	771	849	525	27	31	9	34	444	638	111	677	882	536	415	351	873
CDS	1559309	1560007	699	-	A11510;CDW43_RS07560hypothetical protein;;	0	388	391	247	11	6	8	13	200	313	70	282	403	275	278	195	511
CDS	1560004	1561758	1755	-	A11511;CDW43_RS07565hypothetical protein;;	4	2055	1325	649	37	24	45	24	1482	1765	352	1267	1714	826	755	589	1728
CDS	1561755	1562792	1038	-	A11512;CDW43_RS07570type II secretion system protein;;	0	941	532	187	12	9	7	8	619	820	186	662	793	426	337	271	796
CDS	1562795	1563838	1044	-	A11513;CDW43_RS07575type II secretion system protein;;	4	1682	1559	793	202	233	229	284	661	940	209	1381	1441	731	627	492	1273
CDS	1564077	1565180	1104	-	A11514;CDW43_RS07580type II secretion system protein;;	4	1328	1278	1103	133	246	140	502	574	2222	305	482	588	348	370	249	541
CDS	1565258	1565464	207	-	A11515;CDW43_RS07585hypothetical protein;;	0	316	261	378	51	83	45	153	98	1247	97	46	91	28	87	59	76
CDS	1565764	1567095	1332	+	A11516;CDW43_RS07590sensor histidine kinase;;	10	4250	3438	1656	84	101	135	96	1908	2622	610	3781	5020	2494	1321	1088	4190
CDS	1567088	1567744	657	+	A11517;CDW43_RS07595response regulator transcription factor;;	34	7952	6918	2967	178	195	217	131	3734	4176	874	9218	11494	6136	2455	2220	9179
CDS	1567902	1568339	438	+	A11518;CDW43_RS07600Hsp20/alpha crystallin family protein;;	44	7969	20875	6563	813	485	736	304	1597	2267	1837	2149	2895	1769	1992	1537	3687
CDS	1568510	1569070	561	+	A11519;CDW43_RS07605PepSY domain-containing protein;;	22	11271	7776	2183	1141	984	1159	578	4263	5288	3279	5107	6049	3149	4528	2963	8099
CDS	1569158	1571176	2019	-	A11520;CDW43_RS07610methionine--tRNA ligase;;	77	20271	18466	14321	180	193	421	260	19130	15679	1892	8738	14548	8495	8360	7020	18092
CDS	1571388	1571891	504	+	A11521;CDW43_RS07615hypothetical protein;;	51	3244	3366	1120	152	166	195	132	1671	2198	666	4015	5172	2524	1767	1446	3695
CDS	1571891	1572478	588	+	A11522;CDW43_RS07620succinate dehydrogenase;;	41	4678	4603	1525	148	126	169	109	1944	2355	622	3984	5352	2785	1733	1424	4056
CDS	1572479	1574419	1941	+	A11523;CDW43_RS07625fumarate reductase/succinate dehydrogenase flavoprotein subunit;;	94	12265	12325	3725	179	152	241	206	6482	6847	1463	14477	21347	11603	7197	5759	18966
CDS	1574416	1575141	726	+	A11524;CDW43_RS07630succinate dehydrogenase/fumarate reductase iron-sulfur subunit;;	32	3215	3376	1043	22	7	69	69	1835	1766	340	4812	7654	4275	2714	2259	7076
CDS	1575228	1577150	1923	+	A11525;CDW43_RS07635TIGR00341 family protein;;	18	6471	7661	2526	135	144	227	190	5433	5286	858	4714	7569	4163	3433	2864	7661
CDS	1577195	1578007	813	-	A11526;CDW43_RS07640class I SAM-dependent methyltransferase;;	55	8117	7156	2887	233	294	361	210	5766	6061	1164	7995	9968	5916	3256	2570	9628
CDS	1578136	1579020	885	+	A11527;CDW43_RS07645IS982 family transposase;;	14	4446	6230	2985	82	96	141	106	2399	2360	497	3317	4117	2243	1203	1095	3343
CDS	1579209	1581365	2157	+	A11528;CDW43_RS07650HAD-IIB family hydrolase;;	119	15271	16807	5124	443	486	608	468	6025	6880	1850	17906	24915	12216	5640	4656	16374
CDS	1581366	1582223	858	+	A11529;CDW43_RS07655HAD-IIB family hydrolase;;	26	7266	8148	2560	94	87	174	123	3533	3495	777	8041	11033	5762	2098	1994	8678
CDS	1582220	1583092	873	+	A11530;CDW43_RS07660carbohydrate kinase;;	24	2333	2824	731	77	61	114	111	1261	1436	242	6913	9269	4895	2342	1953	7735
CDS	1583135	1585090	1956	+	A11531;CDW43_RS07665amylosucrase;;	68	15606	14352	3542	261	267	328	261	10697	10684	1780	19235	28933	15724	9726	8031	25569
CDS	1585099	1585485	387	-	A11532;CDW43_RS07670DUF393 domain-containing protein;;	10	2549	2541	1004	104	89	198	90	1601	1469	240	2998	4188	2557	948	853	3607
CDS	1585617	1586930	1314	+	A11533;CDW43_RS07675DASH family cryptochrome;;	28	3096	2623	1659	42	78	205	104	2185	2232	245	1930	2694	1291	571	462	2205
CDS	1586927	1587262	336	+	A11534;CDW43_RS16495deoxyribodipyrimidine photo-lyase;;	3	999	735	487	25	30	40	36	996	942	95	678	1015	573	229	179	949
CDS	1587347	1587562	216	+	A11535;CDW43_RS16500FAD-binding domain-containing protein;;	6	1339	1025	587	21	28	43	25	946	924	189	716	860	490	162	182	740
CDS	1587559	1587675	117	+	A11536;CDW43_RS16685FAD-binding domain-containing protein;;	5	890	836	376	17	26	47	13	611	627	141	795	861	424	182	180	674
CDS	1587805	1588776	972	+	A11537;CDW43_RS07685calcium/sodium antiporter;;	38	2985	2711	1203	247	300	318	298	3658	3672	638	4432	5876	2917	2638	2233	5189
CDS	1589024	1590010	987	+	A11538;CDW43_RS07690sensor domain-containing diguanylate cyclase;;	95	16348	15029	12489	507	436	881	366	7309	6040	1184	3306	3991	2118	3337	3171	3974
CDS	1590152	1591462	1311	-	A11539;CDW43_RS0769530S ribosomal protein S12 methylthiotransferase RimO;;	25	6079	4907	3898	102	147	248	146	8832	7501	1044	2321	3783	2494	2993	2731	6476
CDS	1591676	1592458	783	+	A11540;CDW43_RS07700TIGR01458 family HAD-type hydrolase;;	182	14958	11184	6278	267	441	546	1047	3084	3845	682	5224	5406	2421	1522	1111	3140
CDS	1592443	1593270	828	-	A11541;CDW43_RS07705AmmeMemoRadiSam system protein B;;	1256	62616	41466	19535	1934	3928	4467	16751	5194	7897	1231	22428	23759	11029	3298	2726	12977
CDS	1593702	1594358	657	-	A11542;CDW43_RS07710pyridoxamine 5'-phosphate oxidase family protein;;	50	19477	16544	5889	444	667	558	427	11240	11872	4257	26212	34367	18453	6070	6093	25007
CDS	1594439	1595344	906	-	A11543;CDW43_RS07715LysR family transcriptional regulator;;	8	3807	5394	1370	85	228	188	107	2373	3013	1413	4897	5879	3088	1453	1223	4046
CDS	1595470	1596051	582	+	A11544;CDW43_RS07720NAD(P)H-dependent oxidoreductase;;	8	2180	1979	785	28	64	55	9	1172	1291	363	1495	1638	744	474	320	910
CDS	1596062	1596904	843	+	A11545;CDW43_RS07725pirin family protein;;	10	2623	3093	984	72	94	118	60	1484	1709	480	3031	3421	1606	808	582	1812
CDS	1596962	1597288	327	-	A11546;CDW43_RS07730BON domain-containing protein;;	8	473	545	202	6	6	11	11	376	379	47	489	739	298	145	155	528
CDS	1597416	1597778	363	+	A11547;CDW43_RS07735helix-turn-helix domain-containing protein;;	2	730	702	205	46	29	18	27	280	371	55	404	631	294	135	89	409
CDS	1598527	1599198	672	+	A11548;CDW43_RS07745response regulator;;	28	2425	1934	865	97	59	106	73	876	1024	451	2110	2801	1127	959	659	1441
CDS	1599185	1600552	1368	+	A11549;CDW43_RS07750ATP-binding protein;;	82	3756	3646	1448	174	106	192	137	1004	1370	427	5658	7155	3311	2225	1713	4711
CDS	1600589	1601710	1122	+	A11550;CDW43_RS07755alanine dehydrogenase;;	54	4677	4269	1621	80	111	154	234	1851	2506	424	5176	7240	3738	2296	1752	5321
CDS	1601668	1602693	1026	-	A11551;CDW43_RS07760metal-dependent hydrolase;;	30	3391	3115	1287	64	88	106	123	1914	2130	378	2988	4038	2196	1049	833	3266
CDS	1602840	1604432	1593	+	A11552;CDW43_RS07765tetratricopeptide repeat protein;;	26	7123	6293	2741	300	374	308	246	3393	4125	1046	4373	6337	3710	2171	1898	6379
CDS	1604536	1605003	468	-	A11553;CDW43_RS07770thioredoxin-dependent thiol peroxidase;;	6	2851	2571	1022	59	81	115	115	1750	1865	557	1306	2293	1347	1070	965	2823
CDS	1605121	1606002	882	+	A11554;CDW43_RS077754-hydroxy-tetrahydrodipicolinate synthase;;	124	22295	20949	9895	503	457	1009	441	20427	17776	3163	7792	12716	7464	7929	6921	16115
CDS	1606021	1607055	1035	+	A11555;CDW43_RS07780outer membrane protein assembly factor BamC;;	109	25457	18822	9399	208	147	661	227	20822	14822	2895	13735	23898	14235	12129	10907	30857
CDS	1607055	1607822	768	+	A11556;CDW43_RS07785MBL fold metallo-hydrolase;;	64	8937	7842	3607	189	212	272	236	7406	5533	853	5610	10325	7067	4911	4162	13874
CDS	1607834	1608544	711	+	A11557;CDW43_RS07790phosphoribosylaminoimidazolesuccinocarboxamide synthase;;	72	7562	6337	2809	242	278	311	277	10438	8961	1381	9444	15286	9464	6054	5601	19195
CDS	1609003	1610652	1650	+	A11558;CDW43_RS07795Wzy polymerase domain-containing protein;;	12	7515	4209	958	90	59	81	25	6031	5521	1008	5512	7628	4897	2531	2318	8436
CDS	1610814	1611263	450	+	A11559;CDW43_RS07800prepilin-type N-terminal cleavage/methylation domain-containing protein;;	45	44030	23714	7387	410	261	199	89	30067	27046	17192	4307	6722	3779	26617	20528	6657
CDS	1611535	1612032	498	+	A11560;CDW43_RS07805ATP-dependent zinc protease;;	15	2406	2012	572	59	61	64	61	3175	3723	752	1533	2148	1140	1090	964	2057
CDS	1612029	1612934	906	+	A11561;CDW43_RS0781030S ribosomal protein S6--L-glutamate ligase;;	51	4970	5739	2508	180	201	164	164	5645	5918	954	5805	7894	3976	2977	2640	6903
CDS	1612934	1613989	1056	+	A11562;CDW43_RS07815succinylglutamate desuccinylase/aspartoacylase family protein;;	56	6563	7058	2815	134	101	254	158	5371	5531	783	7009	9982	5606	3708	3153	9139
CDS	1614099	1616048	1950	+	A11563;CDW43_RS07820biosynthetic arginine decarboxylase;;	52	9162	8278	6109	444	503	1311	1865	13423	11372	1274	9319	12684	6902	5480	5080	13505
CDS	1616073	1617272	1200	+	A11564;CDW43_RS07825saccharopine dehydrogenase family protein;;	32	6598	7068	2887	131	162	241	885	6380	5816	1465	8285	12131	6786	4969	4772	15327
CDS	1617630	1618796	1167	+	A11565;CDW43_RS07830carboxynorspermidine decarboxylase;;	37	5666	5917	2285	201	162	308	657	4382	4550	961	4805	6901	3782	3820	3037	7830
CDS	1618793	1619677	885	+	A11566;CDW43_RS07835agmatinase;;	23	6390	6614	2551	165	137	244	354	5231	4980	1068	4798	6502	3158	2370	2156	6015
CDS	1620059	1620466	408	+	A11567;CDW43_RS07840ketosteroid isomerase-related protein;;	31	4873	5347	3552	114	127	357	284	6157	4460	803	1021	1586	1217	1900	1922	3476
CDS	1620550	1621137	588	+	A11568;CDW43_RS07845GNAT family N-acetyltransferase;;	13	3195	2624	1996	32	27	56	22	3476	2385	459	488	871	588	1077	1160	1788
CDS	1621273	1622145	873	+	A11569;CDW43_RS07850carbon-nitrogen hydrolase family protein;;	56	6541	4654	2563	524	545	1188	1803	4459	5893	1431	3462	5415	3326	9005	6674	10565
CDS	1622295	1623377	1083	+	A11570;CDW43_RS07855iron-sulfur cluster carrier protein ApbC;;	95	16436	15065	4760	403	489	786	652	11891	11526	2779	15215	21448	12706	11217	9576	23830
CDS	1623418	1623984	567	+	A11571;CDW43_RS07860dCTP deaminase;;	57	13374	11571	6858	353	365	641	464	9211	8038	1626	18189	25235	14853	8359	8038	23993
CDS	1623999	1625030	1032	+	A11572;CDW43_RS07865hypothetical protein;;	72	15856	15331	7371	148	151	332	208	10267	9417	1403	13200	20752	12256	8239	7189	23459
CDS	1625036	1625353	318	+	A11573;CDW43_RS07870NIF3 1;;	23	2846	2603	1012	51	50	104	64	2093	1931	285	2870	4690	2894	1804	1546	5841
CDS	1625358	1628009	2652	+	A11574;CDW43_RS07875aminopeptidase N;;	172	21823	23677	6463	375	346	597	551	14583	13033	1690	24490	39560	23023	14250	11570	42624
CDS	1628009	1628431	423	+	A11575;CDW43_RS07880HIT domain-containing protein;;	24	6421	7382	1939	268	340	229	232	3817	3362	534	5005	6755	3413	2543	2000	6034
CDS	1628460	1628708	249	+	A11576;CDW43_RS07885DUF2835 domain-containing protein;;	4	4112	4746	1410	230	285	157	123	2941	2823	381	2947	3945	2189	1385	1147	3344
CDS	1628713	1629153	441	-	A11577;CDW43_RS07890RDD family protein;;	15	5576	6668	1972	324	450	297	153	4047	4147	716	3479	4426	2344	1681	1297	3738
CDS	1629232	1633116	3885	+	A11578;CDW43_RS07895phosphoribosylformylglycinamidine synthase;;	179	37660	36785	11357	619	507	1089	779	28823	26114	4412	27747	42944	24237	23041	19066	44556
CDS	1633235	1635352	2118	+	A11579;CDW43_RS07900GGDEF domain-containing protein;;	8	6024	6314	2479	145	136	112	143	3519	2974	377	3573	5552	3246	2472	1969	6856
CDS	1635475	1635924	450	+	A11580;CDW43_RS07905RT0821/Lpp0805 family surface protein;;	51	2021	1583	629	537	641	455	306	620	860	298	11340	11223	5041	2870	2465	6597
CDS	1636162	1639110	2949	-	A11581;CDW43_RS07910EAL domain-containing protein;;	18	13872	10052	5948	233	247	326	290	8552	7878	2263	10272	14809	8329	6010	5344	14847
CDS	1639847	1640479	633	+	A11582;CDW43_RS07915LysE family translocator;;	9	4800	3861	1474	105	107	134	83	3673	3704	530	2613	3349	1879	917	700	3157
CDS	1640735	1642345	1611	+	A11583;CDW43_RS07920diguanylate cyclase;;	45	12866	9545	4739	333	399	499	355	5112	5246	1111	11788	15205	7967	4414	3677	13291
CDS	1642374	1644374	2001	-	A11584;CDW43_RS07925hypothetical protein;;	173	19888	22359	5558	263	222	416	348	7648	8022	1966	18220	23893	12414	6845	5630	17473
CDS	1644673	1645914	1242	-	A11585;CDW43_RS07930carboxylate--amine ligase;;	75	21390	15043	4105	252	217	356	241	6516	6581	1273	7994	11328	5563	2687	1867	8715
CDS	1646309	1648099	1791	+	A11586;CDW43_RS07935diguanylate cyclase;;	57	14078	12229	9067	1721	2717	1160	548	9312	9582	1058	8157	9737	5338	3156	2578	8844
CDS	1648236	1649669	1434	+	A11587;CDW43_RS07940cytochrome-c oxidase, cbb3-type subunit I;;	65	13259	10995	4808	291	276	377	445	4468	5059	1017	9482	9518	4199	1953	1668	5854
CDS	1649786	1650670	885	+	A11588;CDW43_RS07945IS982 family transposase;;	15	4169	5372	2241	80	96	121	90	2115	2071	487	3463	4284	2174	1201	1098	3216
CDS	1650893	1651378	486	+	A11589;CDW43_RS07950DUF488 family protein;;	10	7091	5984	4372	294	429	221	186	4098	4298	1029	4130	3739	1708	538	563	2132
CDS	1651735	1651920	186	-	A11592;CDW43_RS07965carbon storage regulator CsrA;;	322	46906	67405	20633	1688	1685	2060	1702	24964	20336	2622	46016	44752	19105	6490	5851	25193
CDS	1652148	1653368	1221	-	A11593;CDW43_RS07970aspartate kinase;;	41	9724	10618	3061	98	65	104	83	12484	10963	1630	6723	11620	7343	5294	4517	15753
CDS	1653372	1655975	2604	-	A11594;CDW43_RS07975alanine--tRNA ligase;;	154	23999	24897	10638	194	167	526	268	31885	29136	3741	20829	36467	21768	17854	14542	38408
CDS	1655959	1656414	456	-	A11595;CDW43_RS07980recombination regulator RecX;;	73	12092	12282	7064	218	164	465	290	10726	10355	1415	6850	10511	6086	3854	3318	9065
CDS	1656411	1657451	1041	-	A11596;CDW43_RS07985recombinase RecA;;	146	36019	33764	19153	903	706	1581	905	20455	23808	5486	27101	36105	18322	11775	10497	27764
CDS	1657572	1658084	513	-	A11597;CDW43_RS07990CinA family protein;;	40	3993	2344	1146	105	94	189	115	2020	2479	550	5395	6439	3324	1825	1504	4576
CDS	1658101	1660650	2550	+	A11598;CDW43_RS07995DNA mismatch repair protein MutS;;	100	10540	10496	3511	520	496	492	238	9339	8957	1578	11396	17133	9678	7459	6071	15476
CDS	1660665	1660943	279	-	A11599;CDW43_RS08000YcgL domain-containing protein;;	15	2737	2702	1063	47	35	111	73	2304	2238	310	2686	3626	2187	1103	1005	3269
CDS	1660956	1661345	390	-	A11600;CDW43_RS08005VOC family protein;;	35	4380	3696	1801	82	118	160	99	3631	3658	628	4239	5411	2899	1431	1405	4128
CDS	1661374	1661793	420	-	A11601;CDW43_RS08010OsmC family protein;;	28	5951	4677	2248	179	246	268	163	5006	5491	895	5420	6082	3198	1557	1536	4249
CDS	1661888	1662577	690	+	A11602;CDW43_RS08015cAMP-activated global transcriptional regulator CRP;;	161	26289	25794	7984	866	842	805	532	13209	13510	4968	30804	36545	18413	10413	8356	23076
CDS	1662557	1663354	798	-	A11603;CDW43_RS08020indole-3-glycerol phosphate synthase TrpC;;	90	12097	12042	3543	275	284	290	235	10748	9376	2043	14587	20279	11334	8203	6809	16144
CDS	1663364	1664392	1029	-	A11604;CDW43_RS08025anthranilate phosphoribosyltransferase;;	71	8392	9346	2470	132	137	198	239	9227	8472	923	8333	14120	8884	7047	5979	15435
CDS	1664379	1664972	594	-	A11605;CDW43_RS08030aminodeoxychorismate/anthranilate synthase component II;;	26	5482	5657	1773	14	24	80	30	7257	6433	679	4222	7787	4647	3015	2684	8717
CDS	1664988	1666481	1494	-	A11606;CDW43_RS08035anthranilate synthase component I;;	97	19549	19374	8232	110	146	347	232	19593	18533	2252	12733	21153	12907	8863	7799	21387
CDS	1666491	1667159	669	-	A11607;CDW43_RS08040phosphoglycolate phosphatase;;	76	12786	12090	5418	132	160	297	125	9693	9469	1564	7632	11783	6421	4440	3880	9996
CDS	1667163	1667855	693	-	A11608;CDW43_RS08045ribulose-phosphate 3-epimerase;;	66	18952	17342	8606	246	320	620	285	13811	13803	3384	12649	18210	9852	6397	6246	16345
CDS	1668053	1668937	885	+	A11609;CDW43_RS08050DUF3530 family protein;;	18	2375	2137	1079	76	100	115	105	2339	2193	306	1770	2612	1516	1126	916	2652
CDS	1668937	1669743	807	+	A11610;CDW43_RS08055spermidine synthase;;	17	5382	3639	1199	102	127	172	212	2979	3012	546	5480	7666	3927	2236	1739	6052
CDS	1669876	1670433	558	+	A11611;CDW43_RS08060L,D-transpeptidase family protein;;	46	6606	7204	3078	236	245	368	261	3922	5021	592	3349	4753	2492	1318	1085	4144
CDS	1670578	1672755	2178	+	A11612;CDW43_RS08065YgiQ family radical SAM protein;;	100	21456	22505	7884	461	376	717	552	16438	19235	1845	16846	22188	11403	6222	5247	16386
CDS	1672900	1673379	480	+	A11613;CDW43_RS08070cytochrome b;;	213	5469	4473	1977	199	295	386	317	1890	2217	351	7685	8534	4435	1870	1343	5532
CDS	1673397	1673966	570	+	A11614;CDW43_RS08075YceI family protein;;	126	4197	5369	2408	124	225	805	760	1749	1900	384	2922	4021	2029	812	715	3353
CDS	1673976	1674215	240	-	A11615;CDW43_RS08080hypothetical protein;;	54	2543	3186	984	497	709	2405	2624	1082	1427	487	1552	2156	1197	680	444	1758
CDS	1674231	1674359	129	-	A11616;CDW43_RS16835hypothetical protein;;	34	2451	3704	904	292	353	899	953	965	1711	743	695	1038	602	422	308	1026
CDS	1674438	1675124	687	+	A11617;CDW43_RS08085tRNA (adenosine(37)-N6)-threonylcarbamoyltransferase complex dimerization subunit type 1 TsaB;;	71	3516	4725	2092	192	173	319	161	4104	3969	699	1775	3079	1754	2266	1831	3820
CDS	1675121	1675852	732	+	A11618;CDW43_RS08090carboxy-S-adenosyl-L-methionine synthase CmoA;;	29	2495	3307	1323	63	65	124	118	2638	2282	320	1736	2503	1326	1485	1249	2939
CDS	1675849	1676820	972	+	A11619;CDW43_RS08095tRNA 5-methoxyuridine(34)/uridine 5-oxyacetic acid(34) synthase CmoB;;	24	4517	5908	2680	83	78	153	122	2321	2537	262	2249	3711	2183	1928	1760	4895
CDS	1676853	1677236	384	-	A11620;CDW43_RS08100hypothetical protein;;	23	8805	8828	4332	289	409	665	534	3323	3635	495	3662	4382	2416	1047	1130	4084
CDS	1677482	1677673	192	-	A11621;CDW43_RS08105CPXCG motif-containing cysteine-rich protein;;	18	7032	9839	3896	209	203	278	183	2654	3088	451	4150	5784	3227	1223	1025	5094
NcodC	1677801	1678100	300	.	Ncod168;Ncod300Ncod;;	855	37785	79753	11666	1193	954	910	1138	12872	20147	2388	33787	53127	25857	33813	22614	34530
CDS	1678269	1678757	489	-	A11622;CDW43_RS08110GNAT family N-acetyltransferase;;	40	4121	5674	2489	84	78	104	72	3288	3017	380	2927	5516	3219	1585	1139	3886
CDS	1678771	1680543	1773	-	A11623;CDW43_RS08115SLC13 family permease;;	81	8331	9616	5612	651	949	339	505	5248	5352	685	5604	9490	5064	2925	2211	5831
CDS	1680649	1681173	525	-	A11624;CDW43_RS08120lipocalin family protein;;	4	1059	911	534	20	34	46	21	1106	1068	138	1516	1596	683	449	390	1318
CDS	1681267	1682076	810	-	A11625;CDW43_RS08125ion transporter;;	9	2831	2543	2013	65	47	73	74	4014	3779	335	1150	1571	1159	862	818	2203
CDS	1682168	1682659	492	-	A11626;CDW43_RS16270Arc family DNA-binding protein;;	50	6758	5225	2271	100	194	127	80	3495	4164	534	4065	4139	2122	1124	966	2102
CDS	1682852	1684912	2061	+	A11627;CDW43_RS08135EAL domain-containing protein;;	38	10358	6022	4930	184	219	247	203	7729	7161	2527	10588	14399	9726	4887	5038	25868
CDS	1684992	1685372	381	+	A11628;CDW43_RS08140MerC domain-containing protein;;	0	69326	14688	1682	18	13	14	6	194	291	3514	107	135	72	54	38	83
CDS	1685365	1685775	411	+	A11629;CDW43_RS08145TraR/DksA C4-type zinc finger protein;;	0	73569	18468	1943	5	6	7	6	240	397	1953	67	94	37	43	26	47
CDS	1685756	1686967	1212	+	A11630;CDW43_RS08150zinc metallochaperone GTPase ZigA;;	0	154946	39915	4591	30	20	33	18	614	1049	1421	416	568	268	204	181	471
CDS	1687076	1687606	531	+	A11631;CDW43_RS08155DUF1826 domain-containing protein;;	16	46150	15628	2927	113	144	192	147	2829	2756	523	2489	3139	1849	1124	906	2514
CDS	1687624	1688169	546	+	A11632;CDW43_RS08160DUF2796 domain-containing protein;;	1	26417	9074	1633	71	43	105	63	3626	3676	720	2045	2575	1214	734	543	1760
CDS	1688169	1688633	465	+	A11633;CDW43_RS08165transcriptional repressor;;	11	22815	11207	1917	76	63	131	117	2964	3454	639	2976	3780	1996	755	758	2503
CDS	1688722	1689423	702	+	A11634;CDW43_RS08170ABC transporter ATP-binding protein;;	6	31398	14164	2337	23	7	30	31	870	1114	192	473	640	383	182	109	435
CDS	1689524	1691320	1797	+	A11635;CDW43_RS08175TonB-dependent receptor;;	29	23789	17023	2828	105	139	193	165	2563	3223	537	2826	3842	2064	1351	1032	3211
CDS	1691307	1692191	885	-	A11636;CDW43_RS08180IS982 family transposase;;	20	5845	9172	4347	103	113	191	131	2626	2755	604	3362	4613	2386	1486	1226	3623
CDS	1692236	1692508	273	+	A11637;CDW43_RS08185hypothetical protein;;	31	3472	4370	1958	110	128	133	131	1915	2122	358	1386	1928	1030	793	635	1641
CDS	1692511	1693929	1419	+	A11638;CDW43_RS08190DUF3526 domain-containing protein;;	48	5243	5946	3162	141	157	191	178	2611	3144	410	3200	4943	2912	1774	1484	5161
CDS	1693931	1695295	1365	+	A11639;CDW43_RS08195DUF3526 domain-containing protein;;	14	2203	2577	1338	45	57	91	67	1383	1496	200	1427	2130	1474	909	736	2484
CDS	1695288	1696319	1032	+	A11640;CDW43_RS08200GTP-binding protein;;	10	1094	1386	590	25	20	36	25	823	943	96	876	1507	1082	602	443	2131
CDS	1696303	1697946	1644	+	A11641;CDW43_RS08205formylmethanofuran dehydrogenase subunit A;;	31	4359	7136	2998	147	166	196	161	2865	3404	503	2850	4632	2735	2351	1732	5088
CDS	1697951	1698529	579	-	A11642;CDW43_RS08210DUF3299 domain-containing protein;;	18	2943	2892	1753	166	232	204	130	1383	1376	271	2297	2726	1520	657	565	2401
CDS	1698622	1699317	696	+	A11643;CDW43_RS08215ATP-binding cassette domain-containing protein;;	15	2472	2783	1141	111	106	123	100	1191	1520	285	1421	1677	860	430	362	1259
CDS	1699307	1700545	1239	+	A11644;CDW43_RS08220ABC transporter permease;;	15	4192	4516	1916	88	81	127	89	1734	2275	393	2799	3451	1799	987	737	2323
CDS	1700547	1700912	366	-	A11645;CDW43_RS08225hypothetical protein;;	9	3717	3179	1277	121	117	103	95	1216	1599	423	2323	2808	1363	612	455	1701
CDS	1701049	1701360	312	+	A11646;CDW43_RS08230hypothetical protein;;	32	1491	1545	516	348	498	213	72	999	1190	272	2094	2287	1008	713	540	1392
CDS	1701586	1702989	1404	+	A11647;CDW43_RS08235diguanylate cyclase;;	78	6314	7545	3501	300	318	322	214	4945	6202	925	6091	7533	4080	2529	1760	5598
CDS	1703020	1703811	792	+	A11648;CDW43_RS08240hypothetical protein;;	26	5055	5602	2126	75	65	105	65	2664	3327	517	3137	3683	1809	1167	979	2334
CDS	1704027	1705652	1626	-	A11649;CDW43_RS08245PepSY-associated TM helix domain-containing protein;;	135	6609	7120	1926	103	81	122	127	3602	4140	621	3214	4124	2477	1394	1150	4177
CDS	1705666	1705953	288	-	A11650;CDW43_RS08250hypothetical protein;;	43	1214	1267	271	16	7	24	22	360	555	79	355	491	269	112	117	441
CDS	1705950	1706225	276	-	A11651;CDW43_RS08255hypothetical protein;;	57	1320	1417	272	0	4	20	12	392	434	104	185	311	166	91	75	320
CDS	1706291	1708333	2043	-	A11652;CDW43_RS08260TonB-dependent receptor;;	366	15236	15857	1544	88	113	139	93	1718	2139	1093	1494	1684	971	568	505	1444
CDS	1708610	1709632	1023	+	A11653;CDW43_RS08270AraC family transcriptional regulator;;	129	9252	14072	946	76	112	49	69	1054	1341	2846	1013	1141	791	291	284	1023
CDS	1709767	1710345	579	-	A11654;CDW43_RS08275TetR/AcrR family transcriptional regulator;;	17	3688	6071	1618	162	252	236	146	1519	2604	528	2300	2793	1442	649	590	2220
CDS	1710457	1710528	72	-	A11655;CDW43_RS08280pyrroloquinoline quinone precursor peptide PqqA;;	3	793	675	308	48	69	177	70	341	443	110	950	1692	828	660	382	878
CDS	1710639	1711955	1317	-	A11656;CDW43_RS08285mechanosensitive ion channel;;	33	4332	3455	2063	145	178	239	254	2713	2519	653	1117	1788	1211	998	878	2339
CDS	1712079	1712825	747	+	A11657;CDW43_RS08290SDR family oxidoreductase;;	25	5336	3552	4626	222	227	332	483	4175	3639	481	2973	4017	2168	1203	1044	4690
CDS	1712907	1713110	204	-	A11658;CDW43_RS08295cold-shock protein;;	329	141178	114480	70676	1829	2291	2914	5333	586057	400300	22543	41577	90606	50098	39665	32827	118893
CDS	1713391	1714419	1029	-	A11659;CDW43_RS08300acyltransferase;;	28	3896	3975	1748	90	63	106	129	1319	1648	257	2629	3221	2019	860	714	2570
CDS	1714513	1715520	1008	-	A11660;CDW43_RS08305sensor domain-containing diguanylate cyclase;;	25	6191	6149	2881	155	209	135	196	2497	3045	600	3903	4995	2747	1258	1143	4084
CDS	1715731	1716699	969	+	A11661;CDW43_RS08310DUF3080 family protein;;	14	6617	4929	2620	118	137	150	73	3026	2607	545	1970	2708	1556	773	749	2209
CDS	1716703	1718316	1614	-	A11662;CDW43_RS08315methyl-accepting chemotaxis protein;;	75	27679	17299	9222	348	394	567	389	12807	9064	3307	6577	9513	5095	4469	3963	8420
CDS	1718423	1718749	327	-	A11663;CDW43_RS16280hypothetical protein;;	3	4527	3083	1715	80	92	93	40	3138	3355	522	3485	4352	2493	675	558	4053
CDS	1718897	1719259	363	-	A11664;CDW43_RS08320helix-turn-helix domain-containing protein;;	13	10976	7165	5720	373	426	571	222	6018	5833	1667	8027	8035	4091	1026	1020	7390
CDS	1719349	1719876	528	-	A11665;CDW43_RS08325NAD(P)H-dependent oxidoreductase;;	23	8564	7620	5074	418	536	750	303	4490	3978	804	6751	7580	4442	1501	1387	8016
CDS	1719985	1720260	276	-	A11666;CDW43_RS08330cupin domain-containing protein;;	17	5106	5565	3476	107	78	213	260	14055	7859	1175	1998	4108	2746	4087	4000	10968
CDS	1720528	1722741	2214	+	A11667;CDW43_RS08335TonB-dependent receptor;;	2	16007	9422	85	52	32	59	16	1645	2012	4274	2418	2959	1631	1304	1216	2723
CDS	1722812	1724494	1683	-	A11668;CDW43_RS08340NAD-dependent malic enzyme;;	48	5729	6127	1568	129	146	149	109	3189	3375	751	8953	12863	7044	3275	2790	9946
CDS	1724727	1725065	339	+	A11669;CDW43_RS08345DUF2845 domain-containing protein;;	27	7413	4431	3629	323	365	244	282	6247	6224	1385	2834	4675	2390	1882	1530	6160
CDS	1725204	1725509	306	+	A11670;CDW43_RS08350hypothetical protein;;	6	3356	2280	1925	263	348	367	213	1758	1950	300	2240	2443	1069	448	306	1615
CDS	1725761	1726834	1074	+	A11671;CDW43_RS08355HlyD family efflux transporter periplasmic adaptor subunit;;	61	8167	6153	3121	303	133	236	197	4554	5467	787	3632	5303	2671	2567	2071	4223
CDS	1726834	1729611	2778	+	A11672;CDW43_RS08360ribosome-associated ATPase/putative transporter RbbA;;	71	10343	7590	3142	155	175	279	254	6501	6932	825	5141	7189	3969	3188	2568	6631
CDS	1729612	1730733	1122	+	A11673;CDW43_RS08365ABC transporter permease;;	54	3418	2835	1329	90	101	94	134	2042	1880	185	2033	2901	1602	1209	1053	2788
CDS	1730793	1731458	666	-	A11674;CDW43_RS08370HAD family phosphatase;;	6	2780	2840	1743	60	77	77	87	2149	2046	228	1348	1991	1105	818	693	2042
CDS	1731564	1732202	639	-	A11675;CDW43_RS08375arylesterase;;	36	8902	7797	5114	307	371	605	266	3770	4520	835	6150	6612	3002	1227	1012	3993
CDS	1732231	1732962	732	+	A11676;CDW43_RS08380ATP-binding cassette domain-containing protein;;	18	3537	3230	1731	63	47	173	123	1706	2209	381	2623	3356	1583	779	582	2254
CDS	1732959	1735442	2484	+	A11677;CDW43_RS08385FtsX-like permease family protein;;	89	6675	6161	2143	164	90	255	214	3312	4139	732	9161	12881	6822	3050	2375	9452
CDS	1735550	1736251	702	+	A11678;CDW43_RS08390monofunctional biosynthetic peptidoglycan transglycosylase;;	8	3688	3424	1759	115	76	146	40	3150	3787	462	3154	4158	2322	1375	1108	3677
CDS	1736416	1736583	168	+	A11679;CDW43_RS16285hypothetical protein;;	2	1413	2358	1283	111	140	469	373	1062	1109	146	960	1503	821	312	379	1574
CDS	1736706	1736936	231	+	A11680;CDW43_RS08395DUF2789 domain-containing protein;;	30	6162	3504	645	286	336	483	490	2475	2784	543	5263	6072	2805	1300	1026	4259
CDS	1736959	1738293	1335	+	A11681;CDW43_RS08400class II fumarate hydratase;;	50	10637	6452	1175	265	316	470	439	4431	4707	801	11411	10883	4651	2194	1639	5864
CDS	1738308	1738658	351	-	A11682;CDW43_RS08405YkvA family protein;;	12	2140	1549	552	37	25	55	49	1115	1137	154	1473	1633	907	362	342	1254
CDS	1738861	1740156	1296	+	A11683;CDW43_RS16840PAS domain-containing methyl-accepting chemotaxis protein;;	8	5430	5368	2585	78	105	107	52	3432	3204	718	7003	6833	3123	1262	1177	5370
CDS	1740298	1741314	1017	+	A11684;CDW43_RS08415ABC transporter substrate-binding protein;;	19	10247	7389	4011	266	201	217	120	3489	3861	1035	5106	5334	2595	1323	1048	3891
CDS	1741314	1743605	2292	+	A11685;CDW43_RS08420ATP-binding protein;;	51	12259	11838	5436	267	217	334	356	5711	6117	959	9391	11724	6404	3327	2901	10149
CDS	1743614	1744099	486	-	A11686;CDW43_RS08425phosphate-starvation-inducible PsiE family protein;;	7	2382	2378	1130	55	49	96	134	1283	1294	166	1041	1209	764	498	407	1213
CDS	1744541	1744906	366	+	A11687;CDW43_RS08430hypothetical protein;;	29	5102	4755	1216	4028	3160	3155	1136	1861	2935	279	1393	1503	562	550	398	1163
CDS	1745455	1746363	909	+	A11688;CDW43_RS08435neutral zinc metallopeptidase;;	22	9580	8329	3857	418	539	390	193	4550	5284	1061	5064	5862	3136	1235	1049	4446
CDS	1746646	1747197	552	+	A11689;CDW43_RS08440formaldehyde-activating enzyme;;	12	6065	5126	4813	169	192	266	189	9162	8435	1448	2119	3236	1680	2142	1912	3602
CDS	1747278	1748684	1407	-	A11690;CDW43_RS08445D-alanyl-D-alanine carboxypeptidase/D-alanyl-D-alanine-endopeptidase;;	28	9247	10234	4703	194	196	220	128	10174	8747	930	4341	6865	4156	2624	2288	7652
CDS	1748812	1749183	372	-	A11691;CDW43_RS08450membrane protein;;	10	3699	4928	2214	52	38	59	51	2020	2292	327	1203	1513	715	566	471	1172
CDS	1749309	1749548	240	-	A11692;CDW43_RS08455hypothetical protein;;	147	10032	20008	6247	227	378	222	520	2430	3196	617	7768	5142	1892	999	805	1430
Pseudo	1749938	1750831	894	+	A11693;CDW43_RS08460NADP-dependent phosphogluconate dehydrogenase;partial;pseudo	16	2635	3104	1298	138	109	114	53	1111	1351	327	2183	2549	1285	848	753	1936
CDS	1750887	1751564	678	-	A11694;CDW43_RS08465response regulator transcription factor;;	15	3376	3518	1332	102	145	272	197	1915	1997	384	2918	3487	1750	947	753	2447
CDS	1751573	1753069	1497	-	A11695;CDW43_RS08470DUF4118 domain-containing protein;;	19	3903	3813	1282	49	110	80	89	2478	2795	447	3236	3763	2023	905	808	2463
CDS	1753312	1754757	1446	+	A11696;CDW43_RS08475TrkH family potassium uptake protein;;	10	2920	3213	1068	68	66	109	55	2357	2501	447	1898	2580	1174	698	535	2044
CDS	1754774	1756147	1374	+	A11697;CDW43_RS08480Trk system potassium transporter TrkA;;	20	5521	5116	1924	163	158	170	71	2446	3319	566	4408	4800	2442	1126	886	3261
CDS	1756256	1756882	627	+	A11698;CDW43_RS08485LysE family translocator;;	4	1550	1647	678	52	39	47	35	1110	1220	207	1177	1472	811	406	288	1333
CDS	1756899	1757228	330	-	A11699;CDW43_RS08490hypothetical protein;;	0	738	1007	341	15	11	18	17	463	650	84	479	671	356	223	157	446
CDS	1757314	1757769	456	+	A11700;CDW43_RS08495hypothetical protein;;	28	4560	7584	1647	501	742	474	308	1087	1524	445	5774	5923	2798	1087	848	3333
CDS	1757777	1757971	195	-	A11701;CDW43_RS08500short-chain dehydrogenase;;	18	3119	3986	1285	135	186	131	115	1189	1460	241	3340	3583	1847	730	658	2231
CDS	1758116	1758313	198	-	A11702;CDW43_RS08505hypothetical protein;;	8	3005	3338	1009	64	73	89	67	1378	1654	270	2430	2756	1468	558	414	1846
CDS	1758387	1759115	729	-	A11703;CDW43_RS08510dienelactone hydrolase family protein;;	33	4521	5003	1336	78	88	125	154	1729	2058	600	8829	9865	4238	2036	1557	5033
CDS	1759429	1760079	651	+	A11704;CDW43_RS08515hypothetical protein;;	26	8839	7573	2727	449	408	440	291	5146	5453	1450	11725	14723	7077	2700	2180	10887
CDS	1760066	1761307	1242	+	A11705;CDW43_RS08520hypothetical protein;;	47	13428	9497	5351	308	280	448	314	6806	7373	1571	11204	13168	6290	3595	2770	8976
CDS	1761428	1762771	1344	+	A11706;CDW43_RS08525hypothetical protein;;	12	6479	4530	2890	41	51	104	91	3617	3364	464	5059	6779	3507	1378	1155	4868
CDS	1762758	1764764	2007	+	A11707;CDW43_RS08530PEGA domain-containing protein;;	15	6343	4852	2976	83	100	234	255	4255	4047	563	6921	10482	5886	2480	2094	9649
CDS	1764761	1764901	141	+	A11708;CDW43_RS16290hypothetical protein;;	2	1041	775	399	12	18	25	10	687	693	158	1888	2784	1564	542	475	2586
CDS	1764904	1765695	792	+	A11709;CDW43_RS08535MotA/TolQ/ExbB proton channel family protein;;	20	4020	3382	1802	33	50	36	50	2504	2078	373	5481	8105	4708	1798	1674	7738
CDS	1765702	1766772	1071	+	A11710;CDW43_RS08540vWA domain-containing protein;;	28	9412	13258	6810	159	161	150	95	2349	1961	271	3866	6117	3845	1322	1218	6407
CDS	1766769	1767719	951	+	A11711;CDW43_RS08545TMF family protein;;	9	1846	1706	872	26	39	22	46	1587	1386	194	2794	4661	2679	1481	1155	4948
CDS	1768115	1769869	1755	+	A11712;CDW43_RS08550CHASE2 domain-containing protein;;	4	2495	2693	1192	107	88	97	66	3919	4023	651	3766	6140	3436	1635	1353	7972
CDS	1769860	1771413	1554	+	A11713;CDW43_RS08555M48 family metallopeptidase;;	12	4715	4907	2325	93	154	93	118	3395	3252	695	5585	7753	4215	1528	1492	8597
CDS	1771488	1771823	336	-	A11714;CDW43_RS08560hypothetical protein;;	8	3168	3236	1706	77	106	128	190	2016	1860	332	2482	3637	2030	1044	923	3468
CDS	1771946	1772689	744	-	A11715;CDW43_RS08565dienelactone hydrolase family protein;;	32	6389	5357	2657	206	162	419	815	3679	3855	1051	6826	8244	3865	2858	2567	6169
CDS	1772750	1773535	786	-	A11716;CDW43_RS08570NERD domain-containing protein;;	0	2274	3377	1386	30	45	41	54	1538	1502	194	1146	2041	1268	458	467	2285
CDS	1773541	1775643	2103	-	A11717;CDW43_RS08575EAL domain-containing protein;;	53	9642	8910	4015	326	239	237	138	6036	7104	899	5979	8556	4810	2976	2366	7075
CDS	1776153	1776785	633	+	A11718;CDW43_RS08580hypothetical protein;;	22	17542	14894	3379	231	293	228	119	7741	9793	1059	6078	7112	3837	1740	1697	4963
CDS	1776989	1777627	639	-	A11719;CDW43_RS08585response regulator transcription factor;;	3	50651	26764	2470	232	333	106	198	15481	21147	1502	9995	11703	5470	991	809	3419
CDS	1777639	1778328	690	-	A11720;CDW43_RS08590ATP-binding protein;;	4	40909	20427	1190	359	568	50	308	12831	17531	1616	10939	13733	6445	389	335	1668
CDS	1778361	1779233	873	-	A11721;CDW43_RS08595dihydrodipicolinate synthase family protein;;	6	121844	51063	2547	904	1878	221	1096	20475	30971	3809	31559	45154	23088	518	608	2088
CDS	1779476	1780378	903	+	A11722;CDW43_RS08600LysR substrate-binding domain-containing protein;;	20	5267	5295	2300	212	176	179	94	3548	4494	743	3327	4187	2514	1330	1174	4996
CDS	1780530	1781744	1215	+	A11723;CDW43_RS08605NnrS family protein;;	101	15709	19929	5029	232	244	541	236	11418	14026	10166	100657	96905	34633	3943	3279	12435
CDS	1781768	1782076	309	-	A11724;CDW43_RS08610hexameric tyrosine-coordinated heme protein;;	83	9050	12820	2437	91	108	385	180	5414	6462	9580	99080	83898	26046	1564	1451	6976
CDS	1782176	1782592	417	+	A11725;CDW43_RS08615MarR family transcriptional regulator;;	3	3767	3945	1477	72	64	125	47	3529	3392	920	5433	6805	3257	737	648	2418
CDS	1783181	1784065	885	+	A11726;CDW43_RS08620IS982 family transposase;;	14	4361	6370	3045	87	109	176	108	2486	2551	563	3213	4217	2182	1271	1188	3399
CDS	1784271	1786127	1857	-	A11727;CDW43_RS08625TniQ family protein;;	19	8431	8407	3824	266	308	295	198	4602	5476	869	5830	6860	3442	1393	1225	5120
CDS	1786117	1787076	960	-	A11728;CDW43_RS08630TniB family NTP-binding protein;;	4	2549	2414	953	62	77	75	54	1556	1881	327	2261	2713	1350	557	511	2262
CDS	1787086	1789110	2025	-	A11729;CDW43_RS08635DDE-type integrase/transposase/recombinase;;	16	4416	4915	1383	125	181	119	105	2159	2801	764	3267	4140	2327	902	746	2755
CDS	1789098	1789865	768	-	A11730;CDW43_RS08640hypothetical protein;;	0	1099	1238	467	13	33	29	18	601	829	818	547	704	395	189	153	579
CDS	1789918	1790838	921	-	A11731;CDW43_RS08645hypothetical protein;;	33	25249	26401	15015	952	1268	756	400	11115	13117	12645	16493	18766	9015	3236	2740	10298
CDS	1791073	1792068	996	+	A11732;CDW43_RS08650hypothetical protein;;	14	10393	10869	4735	473	480	309	203	7939	8752	1488	7822	8652	4531	2481	1996	6996
CDS	1792575	1793852	1278	-	A11733;CDW43_RS08655hypothetical protein;;	29	5281	5758	2197	88	96	171	172	3645	4132	720	4856	6521	3459	1526	1351	4664
CDS	1794245	1795654	1410	-	A11734;CDW43_RS08660heavy metal sensor histidine kinase;;	38	8341	9614	3468	228	226	335	299	5024	6726	946	6559	8542	4480	2353	1893	6277
CDS	1795641	1796333	693	-	A11735;CDW43_RS08665heavy metal response regulator transcription factor;;	28	3196	3767	1258	112	258	261	247	1948	2756	451	3820	4352	2185	1199	1096	3071
CDS	1796652	1796930	279	+	A11736;CDW43_RS08670hypothetical protein;;	30	957	3669	495	183	807	214	198	3565	5760	379	3465	4963	3211	1487	1019	3689
CDS	1796963	1797526	564	+	A11737;CDW43_RS08675cytochrome c;;	28	2960	6564	1155	145	497	203	200	4967	8097	597	4869	6777	4296	1898	1425	4873
CDS	1797589	1799364	1776	+	A11738;CDW43_RS08680copper resistance system multicopper oxidase;;	92	5061	10092	1910	120	165	278	297	8278	11870	1124	8542	11665	7010	3922	3147	8375
CDS	1799374	1800123	750	+	A11739;CDW43_RS08685copper resistance protein B;;	24	1475	1911	359	19	24	31	69	2216	2444	314	3137	4024	2500	840	689	2877
CDS	1800164	1801489	1326	+	A11740;CDW43_RS08690APC family permease;;	24	4858	4448	960	176	230	195	152	5358	5572	948	6664	9170	5537	3106	2331	6881
CDS	1801885	1802373	489	+	A11741;CDW43_RS08700YHS domain-containing protein;;	24	3808	4722	1782	99	139	140	126	3037	3416	430	4222	4968	3044	1232	994	4154
CDS	1802370	1803068	699	-	A11742;CDW43_RS08705lycopene cyclase domain-containing protein;;	52	9019	9480	4656	212	239	302	208	7120	7841	1149	5471	6463	3459	2026	1531	5681
CDS	1803378	1803836	459	+	A11743;CDW43_RS08710hypothetical protein;;	28	4589	5299	1996	153	182	213	139	2412	2512	631	4710	5022	2272	1394	1002	3294
CDS	1803990	1804892	903	-	A11744;CDW43_RS08715DMT family transporter;;	9	5361	6017	2246	82	114	113	74	2488	3067	462	3868	4555	2615	1111	920	3663
CDS	1805250	1805537	288	-	A11745;CDW43_RS08720DUF5676 family membrane protein;;	15	2062	2500	652	40	38	38	29	971	1164	235	1492	1681	821	496	401	1269
CDS	1805796	1806452	657	-	A11746;CDW43_RS08725isoprenylcysteine carboxylmethyltransferase family protein;;	33	1051	2355	709	43	62	38	90	704	777	125	687	920	562	377	349	849
CDS	1807205	1807621	417	-	A11747;CDW43_RS08735hypothetical protein;;	23	1325	4371	1302	28	19	20	129	519	536	59	606	790	524	131	178	900
CDS	1807640	1808539	900	-	A11748;CDW43_RS08740IS982 family transposase;;	19	9130	7125	1723	102	112	140	112	3178	3436	664	4051	5328	3012	2166	1753	4480
CDS	1808701	1808982	282	-	A11749;CDW43_RS08745DUF2933 domain-containing protein;;	21	2444	2859	891	92	73	72	191	3307	3366	218	3440	4599	3036	1546	1099	4158
CDS	1809035	1811572	2538	-	A11750;CDW43_RS08750heavy metal translocating P-type ATPase;;	211	12419	22445	7962	596	941	1080	1220	14485	23206	1961	21280	28854	17306	8877	6231	19403
NcodD	1812001	1812500	500	.	Ncod225;Ncod500Ncod;;	438	50900	90264	24098	5953	7708	8124	2973	36037	45767	4787	38986	47804	24335	10591	6843	26012
CDS	1812562	1813914	1353	+	A11751;CDW43_RS08760TolC family protein;;	15	4236	6747	3740	86	82	113	75	5529	9265	627	1175	1691	1174	765	601	1289
CDS	1813914	1815809	1896	+	A11752;CDW43_RS08765efflux RND transporter periplasmic adaptor subunit;;	24	2333	2717	1019	32	52	77	26	4417	7732	521	1031	1532	1171	959	827	1757
CDS	1815806	1818976	3171	+	A11753;CDW43_RS08770efflux RND transporter permease subunit;;	58	3850	3959	906	87	62	90	56	5911	7250	666	3477	5270	3395	2888	2137	5586
CDS	1819043	1819393	351	+	A11754;CDW43_RS08775copper-binding protein;;	5	1787	1507	335	12	10	11	10	2808	2839	285	1111	1587	1188	518	453	1852
Pseudo	1819497	1819625	129	+	A11755;CDW43_RS08780redoxin domain-containing protein;partial;pseudo	2	1115	1152	385	31	75	38	24	1136	1117	148	1359	1778	957	422	394	1348
CDS	1820334	1821278	945	+	A11756;CDW43_RS08785hypothetical protein;;	0	1709	2027	831	59	39	53	42	1845	2018	273	1234	1766	972	392	471	1685
CDS	1821271	1822254	984	+	A11757;CDW43_RS08790AAA family ATPase;;	3	2193	2449	859	61	65	77	105	1717	2058	301	2038	2898	1586	655	720	2579
CDS	1822313	1822576	264	+	A11758;CDW43_RS08795hypothetical protein;;	1	397	444	146	4	10	10	11	304	292	71	529	864	443	168	144	793
CDS	1822579	1822992	414	+	A11759;CDW43_RS08800hypothetical protein;;	4	821	979	268	5	19	15	23	524	584	119	834	935	502	197	164	803
CDS	1823014	1823769	756	+	A11760;CDW43_RS08805metallophosphoesterase;;	3	1333	1038	259	24	30	34	24	959	964	161	1283	1809	935	404	381	1562
CDS	1824159	1824884	726	+	A11761;CDW43_RS08810hypothetical protein;;	0	2476	1065	29	13	6	43	2	2003	2192	420	3452	4925	2293	1259	954	3893
CDS	1824919	1825278	360	+	A11762;CDW43_RS08815DUF2513 domain-containing protein;;	0	1944	765	26	16	11	39	5	1225	1371	342	3319	3950	1988	887	895	3079
CDS	1825383	1826303	921	+	A11763;CDW43_RS08820hypothetical protein;;	0	6537	2719	161	76	60	92	8	8099	8859	1514	10158	13631	7296	3160	2866	10741
CDS	1826794	1827042	249	-	A11764;CDW43_RS08830hypothetical protein;;	0	704	413	5	8	2	10	3	684	843	89	648	861	494	253	169	757
CDS	1827642	1828100	459	+	A11765;CDW43_RS08835hypothetical protein;;	0	5994	2614	123	33	14	48	3	3764	4200	1013	4308	4349	2116	996	798	3032
CDS	1828093	1828281	189	+	A11766;CDW43_RS08840type II toxin-antitoxin system RelE/ParE family toxin;;	0	2323	910	37	37	14	56	6	1452	1686	366	2318	2437	1186	516	495	2024
CDS	1828567	1830768	2202	+	A11767;CDW43_RS08845type I secretion system permease/ATPase;;	44	16121	3031	325	228	126	167	81	5391	7531	2318	18401	26313	14474	6436	4669	13956
CDS	1830765	1832165	1401	+	A11768;CDW43_RS08850HlyD family type I secretion periplasmic adaptor subunit;;	8	6003	690	127	44	14	27	2	2299	1804	464	6608	9167	4661	1627	1291	4870
CDS	1832183	1832731	549	+	A11769;CDW43_RS08855hypothetical protein;;	0	2573	331	23	22	0	10	1	938	728	160	3255	5084	2706	1115	780	3201
CDS	1832777	1842109	9333	+	A11770;CDW43_RS16845calcium-binding protein;;	63	21066	4414	370	603	265	283	133	9226	9706	2444	119410	160348	83395	26833	22581	101302
CDS	1842305	1842769	465	-	A11771;CDW43_RS08865DUF2384 domain-containing protein;;	3	4791	1840	135	50	38	58	21	2161	2246	376	3805	4911	2909	1083	827	3887
CDS	1842812	1844857	2046	-	A11772;CDW43_RS08870hypothetical protein;;	3	3239	1327	119	57	72	47	40	2230	2597	320	1676	2275	1298	618	532	2091
CDS	1844854	1845930	1077	-	A11773;CDW43_RS08875TniB family NTP-binding protein;;	4	1410	728	51	20	36	36	33	1016	1286	253	972	1248	668	383	256	1112
CDS	1845927	1847549	1623	-	A11774;CDW43_RS08880DDE-type integrase/transposase/recombinase;;	6	1473	635	45	20	21	21	12	1237	1530	209	922	1203	575	403	328	974
CDS	1847878	1848645	768	-	A11775;CDW43_RS08885hypothetical protein;;	0	558	271	10	20	13	11	8	423	523	112	336	389	252	107	104	368
CDS	1848778	1849503	726	+	A11776;CDW43_RS08890helix-turn-helix transcriptional regulator;;	6	3026	2210	100	70	37	70	12	2075	2612	546	3448	3766	1972	797	694	2564
CDS	1850051	1851328	1278	+	A11777;CDW43_RS08895hypothetical protein;;	14	15860	14432	505	1386	1525	2092	299	10320	11757	4594	30985	34610	15246	4715	4192	18638
CDS	1851341	1853443	2103	+	A11778;CDW43_RS08900AAA family ATPase;;	29	22191	13811	719	207	157	689	117	19442	20581	3381	30818	37916	18298	5973	5700	27640
CDS	1853447	1854064	618	+	A11779;CDW43_RS08905hypothetical protein;;	17	6097	2656	193	70	51	114	49	6438	6574	762	11697	15722	9154	2646	2618	13459
CDS	1854075	1855130	1056	+	A11780;CDW43_RS08910hypothetical protein;;	14	9287	5071	183	80	81	65	72	6875	7104	955	16991	22663	12723	3465	3527	18320
CDS	1855342	1856490	1149	-	A11781;CDW43_RS08915ribonucleotide-diphosphate reductase subunit beta;;	288	35539	64061	7664	480	674	1531	1949	10697	13114	3733	17570	26298	15079	8961	7436	25502
CDS	1856490	1859357	2868	-	A11782;CDW43_RS08920ribonucleoside-diphosphate reductase subunit alpha;;	431	73354	114972	14680	1639	2450	5710	3273	16523	22343	15234	25506	38029	22264	18030	14263	38184
CDS	1859838	1860362	525	-	A11783;CDW43_RS08925hypothetical protein;;	36	9269	10021	3411	349	462	339	212	2772	3460	1058	7260	7352	3459	1436	1261	4823
CDS	1860684	1862081	1398	+	A11784;CDW43_RS08930cytochrome ubiquinol oxidase subunit I;;	166	10610	8914	4473	389	373	687	425	7058	8012	1814	16102	20516	9884	7295	5710	15256
CDS	1862081	1863079	999	+	A11785;CDW43_RS08935cytochrome d ubiquinol oxidase subunit II;;	74	4915	4100	1840	187	142	271	273	2924	3147	530	9109	12640	6713	5489	4035	12353
CDS	1863187	1864866	1680	+	A11786;CDW43_RS08940thiol reductant ABC exporter subunit CydD;;	55	6431	4913	1975	126	125	146	157	3151	2973	425	5760	8084	4628	2659	1971	7032
CDS	1864869	1866560	1692	+	A11787;CDW43_RS08945ATP-binding cassette domain-containing protein;;	12	2847	2616	906	37	35	39	85	1424	1368	249	2213	3678	2156	1409	1091	3884
CDS	1866691	1868436	1746	+	A11788;CDW43_RS08950ShlB/FhaC/HecB family hemolysin secretion/activation protein;;	19	4852	3858	1339	91	91	166	149	2968	2475	1539	4633	6375	4001	3417	2088	4918
CDS	1868610	1869818	1209	+	A11789;CDW43_RS08960IS256 family transposase;;	106	10218	10860	4486	100	93	126	32	8644	8925	2008	13680	17671	9710	4705	3720	14426
CDS	1869982	1875969	5988	+	A11790;CDW43_RS08965hemagglutinin repeat-containing protein;;	94	10464	9922	2570	188	216	282	194	10032	10987	1774	12532	15234	8383	4570	3938	12672
CDS	1876210	1877094	885	-	A11791;CDW43_RS08970IS982 family transposase;;	21	6047	7551	3608	146	173	188	138	3000	2999	696	4872	6498	3287	1854	1785	5613
CDS	1877404	1878291	888	+	A11792;CDW43_RS08975hypothetical protein;;	10	6416	4011	1189	117	121	154	88	4802	4914	766	5560	6506	3530	1135	1154	5971
CDS	1878707	1879366	660	+	A11793;CDW43_RS08980hypothetical protein;;	16	3394	2885	1298	76	75	106	47	3037	2835	489	3147	4149	2433	1081	976	3859
CDS	1879396	1879692	297	+	A11794;CDW43_RS08985hypothetical protein;;	2	1948	1701	677	18	12	22	16	1878	1554	435	3460	4473	2476	973	989	4498
CDS	1879834	1880454	621	+	A11795;CDW43_RS08990hypothetical protein;;	4	11500	5365	1074	55	66	134	42	8448	7477	2576	14744	18424	10454	3770	4189	14335
CDS	1880546	1880941	396	+	A11796;CDW43_RS08995tetratricopeptide repeat protein;;	6	7079	3043	475	19	27	39	24	3453	2819	772	9073	12687	7974	3139	3371	10846
CDS	1880950	1881156	207	+	A11797;CDW43_RS09000AbrB/MazE/SpoVT family DNA-binding domain-containing protein;;	3	5258	3200	692	15	23	33	21	2842	2493	531	2809	4086	2336	1175	1106	3756
CDS	1881153	1881533	381	+	A11798;CDW43_RS09005type II toxin-antitoxin system VapC family toxin;;	12	5170	3577	822	70	90	113	67	2908	2394	584	5741	9122	5439	2782	2411	8950
CDS	1881639	1881863	225	-	A11799;CDW43_RS09010DUF2798 domain-containing protein;;	2	2013	1569	441	32	10	22	11	1198	1022	189	1549	2587	1382	1002	846	2816
CDS	1881899	1882390	492	-	A11800;CDW43_RS09015DUF2938 domain-containing protein;;	8	2348	1560	522	25	24	30	37	1224	1261	456	1272	1963	1091	845	664	1963
CDS	1882470	1882928	459	+	A11801;CDW43_RS09020helix-turn-helix domain-containing protein;;	4	1464	1385	390	21	28	43	20	1048	1132	203	1040	1271	633	406	340	1236
CDS	1883092	1884072	981	-	A11802;CDW43_RS09025LLM class flavin-dependent oxidoreductase;;	32	3106	3775	1057	58	72	92	99	2318	3402	485	2644	3045	1477	975	719	2313
CDS	1884569	1886308	1740	+	A11803;CDW43_RS09030protein adenylyltransferase SelO family protein;;	25	5978	5886	2252	223	218	281	238	3644	4140	647	5265	6264	3166	1651	1364	4673
CDS	1887228	1887899	672	+	A11805;CDW43_RS09045Bax inhibitor-1/YccA family protein;;	1478	58622	69473	24873	4167	5342	7012	10485	21362	21982	5799	60700	62876	25868	18700	14432	37430
CDS	1888178	1889185	1008	+	A11806;CDW43_RS09050GTP 3',8-cyclase MoaA;;	196	25347	19399	8784	1330	1725	1336	918	16329	18459	3515	26754	29178	13437	6670	5866	18780
CDS	1889178	1890017	840	+	A11807;CDW43_RS09055formate dehydrogenase accessory sulfurtransferase FdhD;;	96	18005	13562	7032	703	771	728	545	12062	11816	1600	19582	24198	12457	5951	4913	18648
CDS	1890225	1890635	411	-	A11808;CDW43_RS09060MazG nucleotide pyrophosphohydrolase domain-containing protein;;	4	6468	5048	2556	64	58	53	37	3149	3651	444	3184	4586	2611	1014	1018	4628
CDS	1890635	1891039	405	-	A11809;CDW43_RS09065S4 domain-containing protein;;	27	4210	3406	1505	70	67	85	67	2181	2283	364	4765	7180	3735	1718	1550	5905
CDS	1891039	1893000	1962	-	A11810;CDW43_RS09070acetate--CoA ligase;;	174	17964	14590	7483	800	659	936	751	10226	11088	3417	32431	40951	21542	10629	9197	32780
CDS	1893137	1894657	1521	-	A11811;CDW43_RS09075aldehyde dehydrogenase family protein;;	318	50820	43696	24170	3217	3970	4475	5902	32557	68169	4911	63611	70833	30966	8095	7070	34274
CDS	1894920	1895846	927	+	A11812;CDW43_RS09080AraC family transcriptional regulator N-terminal domain-containing protein;;	87	22161	16971	8448	442	420	386	322	7485	13784	2329	27010	31844	15340	5247	4560	18125
CDS	1896291	1898003	1713	+	A11813;CDW43_RS09085autotransporter assembly complex family protein;;	38	7522	7009	3121	174	202	226	164	3159	4268	615	7174	8235	3709	1385	1035	4620
CDS	1898000	1902055	4056	+	A11814;CDW43_RS09090translocation/assembly module TamB domain-containing protein;;	116	24739	18171	10142	426	373	548	486	14330	15746	2209	23813	28733	13449	5697	4641	16937
CDS	1902125	1902547	423	-	A11815;CDW43_RS09095RNA polymerase-binding protein DksA;;	100	18002	16165	18988	826	948	1596	1197	33569	27569	2861	6362	7971	4274	3432	3855	9554
CDS	1902658	1903425	768	+	A11816;CDW43_RS09100HAD family hydrolase;;	20	3290	4263	1462	115	96	123	128	2049	2371	336	2340	2737	1564	790	726	2337
CDS	1903409	1904608	1200	+	A11817;CDW43_RS09105pyridoxal phosphate-dependent aminotransferase;;	21	6894	10688	3818	140	118	118	88	3284	3298	441	3298	4284	2560	1259	1157	4144
CDS	1904679	1904882	204	+	A11818;CDW43_RS09110(2Fe-2S)-binding protein;;	82	3309	8538	2641	57	43	49	29	336	322	113	249	516	332	229	197	763
CDS	1904943	1907015	2073	-	A11819;CDW43_RS09115TonB-dependent receptor;;	1646	59238	44438	2556	75	83	87	71	5995	5013	13697	5145	11267	9499	10303	10436	24985
CDS	1907164	1907703	540	+	A11820;CDW43_RS09120aminotransferase class I/II-fold pyridoxal phosphate-dependent enzyme;;	5	3284	5450	1655	56	50	67	26	836	901	209	955	1290	797	318	342	1163
CDS	1907774	1907977	204	+	A11821;CDW43_RS09125(2Fe-2S)-binding protein;;	100	3346	8405	2663	57	57	50	38	304	302	110	244	554	396	240	219	749
CDS	1908038	1910110	2073	-	A11822;CDW43_RS09130TonB-dependent receptor;;	1598	58420	44677	2534	86	76	84	54	6052	5159	13779	5255	11271	9743	10588	10486	24713
CDS	1910259	1910798	540	+	A11823;CDW43_RS09135aminotransferase class I/II-fold pyridoxal phosphate-dependent enzyme;;	2	3229	5397	1642	50	52	68	36	858	893	220	953	1290	760	359	337	1204
CDS	1910869	1911072	204	+	A11824;CDW43_RS09140(2Fe-2S)-binding protein;;	73	3321	8338	2667	54	49	57	38	320	313	95	244	492	365	227	230	751
CDS	1911133	1913205	2073	-	A11825;CDW43_RS09145TonB-dependent receptor;;	1553	58951	44333	2523	86	86	100	61	6075	4983	13993	5217	11177	9887	10376	10385	25022
CDS	1913354	1913893	540	+	A11826;CDW43_RS09150aminotransferase class I/II-fold pyridoxal phosphate-dependent enzyme;;	1	3263	5372	1639	37	47	54	35	852	908	229	976	1278	740	343	351	1177
CDS	1913964	1914167	204	+	A11827;CDW43_RS09155(2Fe-2S)-binding protein;;	91	3283	8244	2509	47	44	47	36	313	289	111	252	517	420	253	232	745
CDS	1914228	1916300	2073	-	A11828;CDW43_RS09160TonB-dependent receptor;;	1643	59077	44378	2484	65	73	94	60	6040	5085	13764	5260	11236	9596	10343	10548	24799
CDS	1916605	1917363	759	-	A11829;CDW43_RS09165sulfate transporter CysZ;;	111	3059	2996	1802	56	65	104	51	2145	1799	248	1751	2810	1711	925	754	2920
CDS	1917375	1918652	1278	-	A11830;CDW43_RS09170FGGY-family carbohydrate kinase;;	350	6166	5570	3753	117	143	239	184	3977	4028	519	4592	6169	3450	1928	1742	5220
CDS	1918655	1919044	390	-	A11831;CDW43_RS09175preQ(1) synthase;;	437	5208	5115	3141	179	160	311	226	4930	4613	959	4005	4931	2462	1866	1474	4380
CDS	1919104	1919856	753	+	A11832;CDW43_RS09180cell division protein ZipA C-terminal FtsZ-binding domain-containing protein;;	942	9720	10553	3803	189	223	243	229	7482	6980	1132	6773	8799	4806	3148	2634	7503
CDS	1919840	1921852	2013	+	A11833;CDW43_RS09185NAD-dependent DNA ligase LigA;;	705	10323	12668	3201	161	141	225	251	8773	8455	1071	10442	16739	9543	8036	6388	16291
CDS	1921853	1922899	1047	+	A11834;CDW43_RS09190glycosyl transferase;;	234	4210	4396	1049	76	68	120	73	4158	3659	506	4515	7396	4371	2829	2447	7965
CDS	1922896	1923261	366	+	A11835;CDW43_RS09195secondary thiamine-phosphate synthase enzyme YjbQ;;	32	2844	1794	285	35	19	71	18	2536	2344	416	4082	5543	3097	1928	1570	5217
CDS	1923656	1923808	153	+	A11836;CDW43_RS16380hypothetical protein;;	0	1639	612	16	9	4	7	8	1165	1140	190	1424	2088	1140	531	428	2179
CDS	1923821	1924012	192	+	A11837;CDW43_RS09200hypothetical protein;;	0	1602	742	31	8	8	18	6	1386	1422	219	1326	1856	1011	578	461	1804
Pseudo	1924111	1924866	756	+	A11838;CDW43_RS09205helix-turn-helix domain-containing protein;partial;pseudo	6	1346	716	18	11	18	29	10	1737	1641	283	1414	1772	981	816	657	1984
Pseudo	1924899	1927858	2960	-	A11839;CDW43_RS09210Tn3 family transposase;pseudo;	238	3049	3468	933	229	85	98	34	2753	3632	712	2611	3379	1799	1653	1309	2653
CDS	1927861	1928421	561	-	A11840;CDW43_RS09215recombinase family protein;;	30	5123	6823	742	1465	937	1686	355	7531	12885	1433	14218	19805	10237	11960	8350	11354
CDS	1928680	1928802	123	-	A11841;CDW43_RS16850DnaB-like helicase N-terminal domain-containing protein;;	0	1112	955	340	7	5	16	10	588	694	320	1254	1641	949	360	337	1272
CDS	1929874	1930344	471	-	A11842;CDW43_RS09230hypothetical protein;;	0	2235	1537	857	50	36	62	10	2083	2096	2803	1610	1937	1116	519	459	2045
CDS	1930585	1931166	582	-	A11843;CDW43_RS09235DUF6448 family protein;;	0	669	2920	207	110	29	235	38	904	960	14403	684	1156	733	705	488	1505
CDS	1931382	1932521	1140	-	A11844;CDW43_RS09240AraC family transcriptional regulator;;	21	9937	7925	2310	149	99	227	75	4176	5044	621	7648	10255	4915	2952	2309	6887
CDS	1932512	1933837	1326	-	A11845;CDW43_RS09245ATP-binding protein;;	42	10241	7576	2281	324	185	373	103	5569	8047	1635	11839	15333	7492	4715	3811	9664
CDS	1933827	1934492	666	-	A11846;CDW43_RS09250response regulator transcription factor;;	36	7624	6891	1902	1174	522	1239	248	5215	8033	2225	11634	14488	6315	9100	5622	8509
CDS	1934660	1935976	1317	+	A11847;CDW43_RS09255ferric reductase-like transmembrane domain-containing protein;;	6	434	253	181	66	21	68	43	698	1034	261	1588	2297	984	1370	894	1499
CDS	1936053	1936433	381	+	A11848;CDW43_RS09260PepSY domain-containing protein;;	7	544	354	118	162	101	234	24	1295	1780	774	3065	4243	1801	2137	1527	3010
CDS	1936488	1936961	474	+	A11849;CDW43_RS09265DUF2271 domain-containing protein;;	5	883	526	191	106	63	176	39	1828	2410	917	3141	4541	1925	2272	1508	2838
CDS	1936981	1939197	2217	+	A11850;CDW43_RS09270PepSY domain-containing protein;;	12	3498	2720	1068	189	91	358	55	3589	5436	1313	8750	12193	5580	5740	4022	8070
CDS	1939273	1939971	699	+	A11851;CDW43_RS09275VIT1/CCC1 transporter family protein;;	2	3002	2096	987	79	30	87	23	2566	3055	441	2288	3100	1429	1117	978	2493
CDS	1940226	1940441	216	+	A11852;CDW43_RS16510hypothetical protein;;	1	3254	2600	670	443	158	166	54	1788	1942	311	2680	2734	1398	825	675	1923
CDS	1941077	1941517	441	+	A11853;CDW43_RS09290hypothetical protein;;	0	1414	637	29	7	20	9	0	1420	2013	184	679	775	449	159	122	526
CDS	1941548	1942114	567	-	A11854;CDW43_RS09295hypothetical protein;;	4	989	500	21	8	24	30	2	1024	1755	113	470	582	328	140	123	551
CDS	1942147	1943679	1533	-	A11855;CDW43_RS09300IS66 family transposase;;	38	3354	4914	171	1026	809	674	154	4039	9993	2032	2853	3767	1750	2128	1617	2348
CDS	1943730	1944074	345	-	A11856;CDW43_RS09305IS66 family insertion sequence element accessory protein TnpB;;	3	813	508	19	30	9	16	8	751	958	131	974	1431	784	771	592	1173
CDS	1944071	1944430	360	-	A11857;CDW43_RS09310transposase;;	3	1416	785	31	10	5	23	2	1110	1385	254	1301	1990	895	905	748	1534
CDS	1944479	1944616	138	-	A11858;CDW43_RS16385hypothetical protein;;	0	1376	740	29	15	9	33	0	954	1169	340	2027	2161	1327	577	544	1977
CDS	1944733	1944999	267	-	A11859;CDW43_RS09315hypothetical protein;;	2	1548	772	28	29	27	42	4	1240	1436	361	2610	2798	1492	485	537	2254
CDS	1945049	1945522	474	-	A11860;CDW43_RS09320hypothetical protein;;	0	2847	1594	76	43	24	63	10	2234	2495	620	2273	2512	1299	536	571	2194
CDS	1945720	1946811	1092	-	A11861;CDW43_RS09325hypothetical protein;;	2	3889	1777	106	74	64	87	10	3783	4154	599	2730	3500	1944	726	634	3171
CDS	1946855	1947022	168	-	A11862;CDW43_RS16390hypothetical protein;;	0	2128	887	36	2	9	19	3	1380	1728	353	958	1126	559	219	153	927
CDS	1947189	1948403	1215	+	A11863;CDW43_RS09330site-specific integrase;;	4	11952	5362	260	98	64	152	31	6307	7437	1646	9663	11222	6211	2405	2083	8893
CDS	1948418	1950079	1662	+	A11864;CDW43_RS09335hypothetical protein;;	2	11351	5433	205	56	48	96	14	7713	9186	1129	7560	9801	5996	2557	2219	9431
CDS	1950076	1952067	1992	+	A11865;CDW43_RS09340tyrosine-type recombinase/integrase;;	10	10487	4427	183	59	42	80	16	7160	7217	1137	7468	11599	6625	2311	2185	13464
CDS	1952054	1952431	378	+	A11866;CDW43_RS09345hypothetical protein;;	0	2441	970	63	27	23	6	3	1820	1516	262	2919	4367	2373	640	694	4935
CDS	1952630	1953049	420	+	A11867;CDW43_RS09350secondary thiamine-phosphate synthase enzyme YjbQ;;	0	4569	2184	92	49	31	37	13	2680	2893	657	4613	5189	2648	1017	963	4513
CDS	1953194	1953475	282	-	A11868;CDW43_RS09355helix-turn-helix transcriptional regulator;;	0	2604	1146	51	16	14	19	2	2196	2352	388	3083	4516	2259	1035	788	3862
CDS	1953942	1955456	1515	+	A11869;CDW43_RS09360IS21 family transposase;;	44	5795	4401	415	103	74	81	54	2513	3383	918	4175	5467	2625	2399	1816	4078
CDS	1955468	1956214	747	+	A11870;CDW43_RS09365IS21-like element helper ATPase IstB;;	5	1519	991	178	29	19	26	23	1894	2207	314	1184	1850	980	997	778	1700
CDS	1956891	1957097	207	-	A11871;CDW43_RS09370MbcA/ParS/Xre antitoxin family protein;;	0	1731	628	45	52	44	57	22	2085	2006	421	1290	1713	965	705	545	1980
CDS	1957351	1958358	1008	+	A11872;CDW43_RS09375PIN domain-containing protein;;	0	5395	2582	103	84	19	62	14	3370	4541	905	4792	5454	2621	1458	1293	4310
CDS	1958415	1959803	1389	+	A11873;CDW43_RS09380hypothetical protein;;	0	14144	6259	287	179	98	144	32	11063	12193	2330	16594	19367	10049	3678	3335	16483
CDS	1959874	1960284	411	+	A11874;CDW43_RS09385hypothetical protein;;	2	5456	2206	99	39	33	59	4	4218	4184	967	6373	8858	4670	1598	1347	7146
CDS	1960399	1962777	2379	+	A11875;CDW43_RS09390DUF4238 domain-containing protein;;	0	6730	2768	84	35	36	49	15	5974	5596	826	7215	11440	7270	3137	2737	14520
CDS	1962973	1963671	699	+	A11876;CDW43_RS09395TIGR02391 family protein;;	2	6979	2693	180	56	25	60	11	9782	9247	1308	5863	7231	4232	2257	2209	8193
CDS	1963765	1964268	504	+	A11877;CDW43_RS09400hypothetical protein;;	0	5249	2099	130	28	17	35	1	4696	4568	772	3779	5075	2799	1216	1204	5614
CDS	1964571	1964762	192	+	A11878;CDW43_RS09405hypothetical protein;;	0	1666	731	35	12	11	35	2	1557	1717	197	1682	2723	1500	931	793	3270
CDS	1964759	1966072	1314	+	A11879;CDW43_RS09410hypothetical protein;;	2	7532	3454	119	69	42	94	10	6907	7292	1230	5291	7338	4140	2749	2361	8148
CDS	1966374	1966904	531	+	A11880;CDW43_RS09420ribosome biogenesis factor YjgA;;	126	12009	7714	2190	133	64	138	61	9743	10265	1185	5310	6918	3581	1881	1821	5907
CDS	1966898	1968250	1353	-	A11881;CDW43_RS09425ATP-binding protein;;	164	18444	16948	7212	270	231	266	156	12136	10568	1313	12378	20984	12223	5711	4592	17974
CDS	1968243	1968920	678	-	A11882;CDW43_RS09430response regulator transcription factor;;	149	21932	18774	7186	295	272	329	232	8538	9078	1944	16434	26837	14157	7829	6040	20499
CDS	1968923	1969213	291	-	A11883;CDW43_RS09435hypothetical protein;;	131	18022	12768	5193	191	252	228	115	5492	6141	1439	13724	21646	11802	4258	3691	16126
CDS	1969281	1969676	396	-	A11884;CDW43_RS09440cytochrome c;;	62	46297	24617	13230	65	107	113	108	7044	7333	2060	24603	40264	21470	7774	7229	26260
CDS	1969945	1973832	3888	-	A11885;CDW43_RS09445ATP-dependent RNA helicase HrpA;;	568	15604	19424	6419	226	229	340	283	25913	20455	2044	8799	17614	12208	11578	9992	27012
CDS	1973968	1974933	966	-	A11886;CDW43_RS09450DUF481 domain-containing protein;;	316	10553	10757	6627	251	257	474	261	13156	10923	1234	12699	17081	8589	4132	3899	12222
CDS	1975123	1975587	465	-	A11887;CDW43_RS09455pentapeptide repeat-containing protein;;	716	8117	8895	3746	537	716	1090	442	3589	3666	776	15037	17519	8143	2915	2406	10267
CDS	1975619	1976212	594	-	A11888;CDW43_RS09460nitroreductase family protein;;	341	5145	4574	2454	198	202	336	186	5426	5089	702	4581	6551	3482	1857	1802	5762
CDS	1976231	1976524	294	-	A11889;CDW43_RS09465ribosome assembly RNA-binding protein YhbY;;	352	3795	3030	1803	105	125	203	97	5073	4700	642	3528	5144	2715	1433	1438	4343
CDS	1976574	1978808	2235	+	A11890;CDW43_RS09470bifunctional 23S rRNA (guanine(2069)-N(7))-methyltransferase RlmK/23S rRNA (guanine(2445)-N(2))-methyltransferase RlmL;;	697	19274	17979	7176	359	301	374	277	13560	14545	1748	12040	15895	7976	5639	4827	12782
CDS	1978800	1979552	753	-	A11891;CDW43_RS09475ParA family protein;;	55	11408	11683	3061	298	247	572	560	6385	7300	855	11041	16082	8653	4414	3564	12468
CDS	1979555	1981651	2097	-	A11892;CDW43_RS09480polyphosphate kinase 1;;	332	19004	17428	6073	986	1139	4072	3896	14026	13777	2354	28991	43537	22473	10489	9227	38517
CDS	1981774	1982253	480	-	A11893;CDW43_RS09485DUF6231 family protein;;	68	9451	8085	3018	170	169	246	174	5053	5446	1065	6821	8890	4385	2692	2159	6276
CDS	1982252	1982725	474	+	A11894;CDW43_RS09490YcgN family cysteine cluster protein;;	33	8732	6414	1972	171	186	278	195	5798	5641	953	7095	9228	4656	2446	2293	7421
CDS	1982715	1983140	426	+	A11895;CDW43_RS09495hypothetical protein;;	25	3747	3183	1115	117	96	106	68	2999	2967	386	3516	4963	2799	1474	1366	4360
CDS	1983539	1984831	1293	+	A11896;CDW43_RS09500M18 family aminopeptidase;;	35	4622	5864	1997	74	72	68	59	8719	7169	816	3093	5285	3261	2601	2488	6823
CDS	1984852	1985136	285	+	A11897;CDW43_RS09505hypothetical protein;;	11	1466	1675	595	13	17	51	27	2240	1716	297	1627	2709	1832	1362	1264	4209
CDS	1985153	1985875	723	+	A11898;CDW43_RS09510DUF445 domain-containing protein;;	19	2855	3352	882	18	8	71	43	3815	3294	558	2809	5232	3299	3030	2512	7408
CDS	1985872	1986516	645	+	A11899;CDW43_RS09515class I SAM-dependent methyltransferase;;	18	2780	3445	746	40	32	55	38	2156	2089	281	1441	2657	1758	1116	1112	3555
CDS	1986506	1987084	579	-	A11900;CDW43_RS09520YigZ family protein;;	10	1975	2454	683	18	39	29	26	1255	1446	251	1411	1945	1117	579	403	1680
CDS	1987196	1990054	2859	+	A11901;CDW43_RS09525RNA polymerase-associated protein RapA;;	25	7292	7523	3011	170	130	204	178	10397	9201	1090	4331	7645	4844	4887	4569	11676
CDS	1990095	1991327	1233	+	A11902;CDW43_RS09530efflux RND transporter periplasmic adaptor subunit;;	24	3754	3965	1581	116	93	155	94	3162	3103	584	2459	4426	2959	2988	2517	6190
CDS	1991320	1994457	3138	+	A11903;CDW43_RS09535efflux RND transporter permease subunit;;	119	7896	7955	2575	167	140	256	186	7664	6717	1282	8301	12704	7550	6794	5508	15384
CDS	1994468	1995688	1221	+	A11904;CDW43_RS09540TolC family protein;;	45	6880	6588	2570	62	44	88	145	4436	4050	825	6306	8829	5521	2900	2632	9035
CDS	1995704	1996372	669	-	A11905;CDW43_RS09545transglutaminase-like cysteine peptidase;;	16	3850	2889	1429	44	21	45	33	1433	1369	265	2604	3301	1988	778	705	2900
CDS	1996376	1998277	1902	-	A11906;CDW43_RS09550LapD/MoxY N-terminal periplasmic domain-containing protein;;	77	8783	5436	3909	138	125	175	218	4863	4844	1775	12375	15247	7770	3389	2881	10243
CDS	1998515	1999408	894	+	A11907;CDW43_RS09555AEC family transporter;;	31	4521	4948	2263	96	121	197	102	2826	3079	539	3338	4237	2284	1878	1543	3335
CDS	1999393	2000139	747	-	A11908;CDW43_RS09560competence/damage-inducible protein A;;	19	6599	6464	3981	141	107	193	129	3724	3997	717	6559	8471	4622	2362	2281	6019
CDS	2000142	2000537	396	-	A11909;CDW43_RS09565group II truncated hemoglobin;;	22	3561	3394	2276	84	100	124	112	1912	2155	395	4113	4774	2695	1261	1075	3605
CDS	2000670	2001221	552	+	A11910;CDW43_RS09570formaldehyde-activating enzyme;;	90	45884	47349	12573	399	313	852	728	28235	26125	11100	27993	38645	17795	16813	14521	31427
CDS	2001640	2002140	501	+	A11911;CDW43_RS09575hypothetical protein;;	33	7081	6411	2393	216	203	303	240	4341	4659	1127	7082	8040	3487	2076	1639	4310
CDS	2002180	2004102	1923	+	A11912;CDW43_RS09580ATP-dependent DNA helicase;;	77	15289	14471	4608	210	199	306	274	9006	8969	1531	14979	21401	11433	5786	4975	15616
CDS	2004135	2004506	372	-	A11913;CDW43_RS09585DUF2237 domain-containing protein;;	15	6552	6235	2136	126	157	201	135	2066	2145	609	7450	8297	3653	1419	1243	4957
CDS	2004521	2004907	387	-	A11914;CDW43_RS095904a-hydroxytetrahydrobiopterin dehydratase;;	23	9399	8570	3260	179	190	213	138	2032	2648	1331	6960	7513	2932	1173	1053	4098
CDS	2004960	2005244	285	-	A11915;CDW43_RS09595hypothetical protein;;	2	3758	4940	1029	89	57	63	66	745	920	515	1546	1370	483	276	221	638
CDS	2005833	2009282	3450	-	A11916;CDW43_RS09600DEAD/DEAH box helicase family protein;;	119	34920	14052	3257	610	534	676	392	15644	16150	3044	22949	30557	17119	10721	8845	25403
CDS	2009312	2010502	1191	-	A11917;CDW43_RS09605restriction endonuclease subunit S;;	13	3257	3012	1494	94	103	227	359	2334	1829	476	1685	2617	1699	1385	1329	4122
CDS	2010502	2012085	1584	-	A11918;CDW43_RS09610class I SAM-dependent DNA methyltransferase;;	34	4333	3598	1736	66	65	97	83	4990	4045	815	1333	2163	1473	1734	1793	3661
CDS	2012406	2014535	2130	+	A11919;CDW43_RS09615molybdopterin oxidoreductase family protein;;	54	7121	5905	2309	161	151	133	102	2231	2753	969	11524	12583	6410	2309	2106	8348
CDS	2014567	2014872	306	+	A11920;CDW43_RS096204Fe-4S binding protein;;	2	978	735	315	25	15	23	16	360	373	80	1860	2062	1019	265	319	1367
CDS	2014890	2016266	1377	+	A11921;CDW43_RS09625FAD-dependent oxidoreductase;;	15	4680	3851	1537	105	66	73	121	1764	2150	390	4216	4716	2589	886	855	3088
CDS	2016353	2016529	177	-	A11922;CDW43_RS16400hypothetical protein;;	3	848	695	171	26	16	33	36	327	383	81	1008	1123	718	203	233	935
CDS	2016687	2018465	1779	+	A11923;CDW43_RS09630methanol/ethanol family PQQ-dependent dehydrogenase;;	383	24809	24854	4261	14045	6873	1887	4701	12560	194545	9510	13276	16755	7597	6072	4335	10036
CDS	2018914	2020116	1203	+	A11924;CDW43_RS09635NO-inducible flavohemoprotein;;	225	34838	27614	11314	1411	1822	1453	754	26385	27308	7494	37820	52082	28741	10274	9800	42274
CDS	2020230	2020538	309	+	A11925;CDW43_RS09640hypothetical protein;;	28	3050	1448	192	34	15	21	21	2601	2283	361	3459	4598	2488	1109	953	3635
CDS	2020541	2021230	690	-	A11926;CDW43_RS09645hypothetical protein;;	10	2088	1489	476	13	21	33	25	2361	1927	308	4393	7165	3549	2509	2098	6679
CDS	2021223	2022005	783	-	A11927;CDW43_RS09650iron permease;;	24	1536	1302	509	30	27	27	38	1586	1258	240	3212	5486	2994	2504	1823	5178
CDS	2022008	2022346	339	-	A11928;CDW43_RS09655cupredoxin domain-containing protein;;	17	820	689	304	9	8	7	15	636	556	122	1258	2091	1128	792	650	1647
CDS	2022343	2023668	1326	-	A11929;CDW43_RS09660ATP-binding protein;;	48	3973	3438	1300	106	116	120	137	3113	3186	560	12805	19877	10584	6036	5596	15266
CDS	2023665	2024324	660	-	A11930;CDW43_RS09665response regulator transcription factor;;	23	2072	1807	809	102	109	113	119	1500	1385	364	11516	16511	8257	4297	4037	11430
CDS	2024305	2024973	669	-	A11931;CDW43_RS09670hypothetical protein;;	17	2608	1835	838	106	98	96	103	1814	1525	606	11427	16700	7712	3865	3543	12227
CDS	2024970	2025782	813	-	A11932;CDW43_RS09675SDR family oxidoreductase;;	4	1425	736	135	25	23	23	22	2009	1393	465	16442	25316	12579	5738	5592	18090
CDS	2025779	2026426	648	-	A11933;CDW43_RS09680iron-containing redox enzyme family protein;;	3	536	463	125	32	18	18	10	1477	1064	332	11482	17773	8549	4815	4617	13069
CDS	2026413	2027891	1479	-	A11934;CDW43_RS09685AMP-binding protein;;	21	2350	2001	668	94	84	114	96	3885	2910	882	20254	29380	13100	9480	8500	19161
CDS	2027888	2028583	696	-	A11935;CDW43_RS09690thermostable hemolysin;;	9	2054	2126	849	58	26	82	64	4039	3041	947	11722	18956	7926	5260	4425	11086
CDS	2028776	2028988	213	-	A11936;CDW43_RS09695hypothetical protein;;	5	2119	2232	946	80	57	104	82	795	1162	535	2517	2573	1221	812	612	1584
CDS	2029205	2030953	1749	+	A11937;CDW43_RS09700C4-dicarboxylic acid transporter DauA;;	90	3313	3302	2014	200	209	276	216	2591	3277	1103	3665	5011	3042	2574	2175	4781
CDS	2031110	2033086	1977	-	A11938;CDW43_RS09705LTA synthase family protein;;	12	2426	2657	1231	68	79	137	120	4009	3049	693	8570	15775	8473	7198	6080	15701
CDS	2033086	2033457	372	-	A11939;CDW43_RS09710diacylglycerol kinase;;	15	993	1284	330	32	25	24	21	1640	1049	308	3436	7030	3559	4051	2844	6148
CDS	2034105	2035076	972	-	A11940;CDW43_RS09720glutathione S-transferase family protein;;	87	6925	6226	2272	110	121	195	175	3073	2950	1103	12037	17586	9738	4210	3883	15863
CDS	2035155	2035556	402	+	A11941;CDW43_RS09725hypothetical protein;;	7	2850	2403	2000	130	95	129	91	3167	3624	350	3438	4888	2893	1391	1244	6229
CDS	2035612	2038131	2520	+	A11942;CDW43_RS09730protein translocase subunit SecD;;	43	5267	7190	2292	154	178	244	200	3518	4488	655	10073	16830	9860	6322	4948	22115
CDS	2038217	2039272	1056	+	A11943;CDW43_RS09735calcium/sodium antiporter;;	61	8814	10732	2355	221	282	248	223	3457	3947	1154	9358	12507	6658	3981	3187	11754
CDS	2039330	2040355	1026	-	A11944;CDW43_RS09740M48 family metalloprotease;;	57	5001	4559	1651	101	59	125	164	1948	1952	655	7147	9492	4167	2564	2067	6390
CDS	2040358	2040936	579	-	A11945;CDW43_RS09745LemA family protein;;	71	5408	4853	2044	151	129	221	188	2192	2443	1133	7868	9214	4531	2147	1792	6550
CDS	2041083	2041217	135	+	A11946;CDW43_RS16855hypothetical protein;;	0	544	423	191	17	30	58	30	291	329	85	643	736	403	174	124	604
CDS	2041260	2042918	1659	+	A11947;CDW43_RS09750energy-dependent translational throttle protein EttA;;	126	17795	17714	7123	327	296	710	630	17954	14683	4284	10471	16803	10289	10442	9482	24525
NCodE	2042968	2043286	319	.	Ncod82;NCod318Ncod;;	62	7052	37355	2996	186	305	263	452	49235	78429	1188	7193	12860	8157	9685	6383	10061
CDS	2043336	2045036	1701	-	A11948;CDW43_RS09755NADPH-dependent assimilatory sulfite reductase hemoprotein subunit;;	245	27237	58183	16363	299	269	513	479	82315	68825	2804	33384	66586	40837	11285	10526	37469
CDS	2045036	2046835	1800	-	A11949;CDW43_RS09760assimilatory sulfite reductase (NADPH) flavoprotein subunit;;	380	76926	126603	51612	2037	2836	1132	1426	97526	85512	7415	33149	65662	43598	14326	13406	38628
CDS	2047110	2049254	2145	-	A11950;CDW43_RS09765EAL domain-containing protein;;	92	29090	27387	12080	641	771	529	409	12862	12701	1947	21998	32697	18043	8069	6508	29046
CDS	2049312	2053208	3897	-	A11951;CDW43_RS09770PAS domain-containing protein;;	131	55871	51634	21348	1064	1006	1216	1011	22599	25438	5183	43974	52098	26176	10751	9473	39148
CDS	2053289	2055163	1875	-	A11952;CDW43_RS09775methyl-accepting chemotaxis protein;;	21	15902	12990	5936	259	315	364	240	9280	7337	1430	4713	6627	3845	3096	2363	7574
CDS	2055264	2055899	636	-	A11953;CDW43_RS09780GDSL-type esterase/lipase family protein;;	26	5511	4467	1872	125	129	119	115	3537	3317	500	4641	6603	3916	1962	1765	6720
CDS	2055899	2056678	780	-	A11954;CDW43_RS09785TatD family hydrolase;;	42	7903	8774	3391	189	200	206	166	6376	6064	983	5854	7981	5132	2534	2468	9019
CDS	2056716	2057069	354	-	A11955;CDW43_RS09790PilZ domain-containing protein;;	33	7603	7651	3229	150	211	181	145	4136	4088	989	5056	6869	3952	1890	1779	7343
CDS	2057103	2058065	963	-	A11956;CDW43_RS09795DNA polymerase III subunit delta';;	40	8595	7906	3088	250	277	312	286	6026	4764	931	6509	9625	6139	3456	3189	12213
CDS	2058065	2058697	633	-	A11957;CDW43_RS09800dTMP kinase;;	25	4975	4924	1925	42	33	77	51	4202	3046	525	2934	5483	3302	2619	2328	7613
CDS	2058694	2059719	1026	-	A11958;CDW43_RS09805endolytic transglycosylase MltG;;	29	6668	5548	2652	80	62	107	78	5165	4308	667	3634	5978	3992	2466	2424	9355
CDS	2059716	2060546	831	-	A11959;CDW43_RS09810aminodeoxychorismate lyase;;	24	6332	5663	2512	100	110	153	169	5329	3832	629	3051	5519	4120	4006	3370	9961
CDS	2060557	2061798	1242	-	A11960;CDW43_RS09815beta-ketoacyl-ACP synthase II;;	169	18492	14591	5984	537	429	717	558	20217	14836	3052	10698	20746	12897	19453	16817	34962
CDS	2061893	2062129	237	-	A11961;CDW43_RS09820acyl carrier protein;;	62	17507	13811	6198	415	382	760	929	22774	12843	2643	4619	8441	4785	11155	9028	17673
CDS	2062267	2063010	744	-	A11962;CDW43_RS098253-oxoacyl-ACP reductase FabG;;	87	8791	8607	2643	98	77	145	149	14731	8929	1514	5033	10446	7156	10557	9567	20252
CDS	2063007	2063948	942	-	A11963;CDW43_RS09830ACP S-malonyltransferase;;	103	10204	10731	3490	61	76	124	112	17800	9930	1600	4395	9337	6524	10162	8126	17541
CDS	2063967	2064926	960	-	A11964;CDW43_RS09835beta-ketoacyl-ACP synthase III;;	117	20081	20455	7881	73	71	167	117	33354	17982	2324	7126	17047	12402	16843	13606	32605
CDS	2064923	2065942	1020	-	A11965;CDW43_RS09840phosphate acyltransferase PlsX;;	131	48134	44823	23475	180	140	401	222	57100	35312	4529	11178	24798	14884	18457	15571	39906
CDS	2065956	2066135	180	-	A11966;CDW43_RS0984550S ribosomal protein L32;;	156	22720	22195	10381	170	118	325	143	22720	18144	2789	6436	12992	7679	9794	7593	17772
CDS	2066170	2066727	558	-	A11967;CDW43_RS09850YceD family protein;;	30	46157	44728	24727	328	183	429	242	36124	30147	4754	5806	9267	5069	5518	4674	10157
CDS	2066796	2068304	1509	-	A11968;CDW43_RS09855amidophosphoribosyltransferase;;	113	33773	28413	14560	546	530	1000	475	26335	29039	2782	19585	27546	15774	9251	7909	25053
CDS	2068325	2068816	492	-	A11969;CDW43_RS09860CvpA family protein;;	42	21778	17751	8456	376	383	578	301	11113	13004	1822	7114	9391	5285	3331	2950	8956
CDS	2068924	2069619	696	-	A11970;CDW43_RS09865SPOR domain-containing protein;;	111	14331	15915	4081	252	201	362	433	9648	10983	1458	8156	12011	7205	6271	5088	13856
CDS	2069647	2072082	2436	-	A11971;CDW43_RS09870endopeptidase La;;	466	77221	109820	20161	1226	979	1859	1437	38552	50838	14034	41780	58535	31567	28261	22087	58607
CDS	2072373	2073644	1272	-	A11972;CDW43_RS09875ATP-dependent Clp protease ATP-binding subunit ClpX;;	223	80197	75252	23807	1361	1401	1848	1256	59992	56191	10701	84369	102419	49618	22890	20950	73882
CDS	2073674	2074309	636	-	A11973;CDW43_RS09880ATP-dependent Clp endopeptidase proteolytic subunit ClpP;;	85	29154	25327	8856	437	561	521	358	32635	27258	4875	23085	26934	12749	6482	6008	20958
CDS	2074398	2075696	1299	-	A11974;CDW43_RS09885trigger factor;;	130	70696	58102	30622	997	912	1956	989	77477	65323	10963	39323	55063	29958	20034	19106	56911
CDS	2075912	2077354	1443	-	A11976;CDW43_RS09895HDOD domain-containing protein;;	102	28989	34129	9493	541	655	868	687	20076	20995	3083	20688	27199	15861	8109	7271	25177
CDS	2077351	2078274	924	-	A11977;CDW43_RS099005'-nucleotidase;;	38	8772	8612	3085	138	120	177	120	7670	8282	1186	6452	10000	5666	2895	2766	8910
CDS	2078280	2078849	570	-	A11978;CDW43_RS09905NERD domain-containing protein;;	31	15226	12307	4792	532	435	409	274	9078	10472	1165	11618	14457	7735	3727	3254	11399
CDS	2078905	2079813	909	-	A11979;CDW43_RS09910cation diffusion facilitator family transporter;;	21	12332	13097	4238	172	177	211	184	8106	9632	1303	7561	10274	6014	3102	2532	8826
CDS	2079901	2081535	1635	+	A11980;CDW43_RS09915alpha-D-glucose phosphate-specific phosphoglucomutase;;	78	16678	17610	5954	252	324	433	392	11571	13935	2722	15759	23291	12592	6883	6041	20279
CDS	2081550	2082155	606	+	A11981;CDW43_RS09920nucleoside triphosphate pyrophosphatase;;	27	7196	6452	2996	132	192	293	142	4837	5042	843	8194	11737	6640	2717	2492	11041
CDS	2082149	2082550	402	-	A11982;CDW43_RS09925hypothetical protein;;	38	7695	5455	3097	325	425	481	267	4060	4570	1486	7854	9787	5009	1966	1796	8020
CDS	2082719	2083708	990	+	A11983;CDW43_RS09930phosphotransferase;;	31	7747	6716	2529	163	197	245	155	8294	7537	965	4031	5945	3604	3431	2634	6703
CDS	2083705	2084400	696	+	A11984;CDW43_RS09935nucleotidyltransferase family protein;;	42	13985	16084	4306	730	678	634	324	8065	7895	1416	7766	9994	5209	5621	4682	9333
CDS	2084377	2085273	897	-	A11985;CDW43_RS09940ornithine carbamoyltransferase;;	84	18498	18137	8057	168	224	400	214	15352	12931	2035	10761	17623	10897	8313	7945	20355
CDS	2085275	2086474	1200	-	A11986;CDW43_RS09945aspartate aminotransferase family protein;;	122	31166	29455	16287	210	237	615	409	24484	23400	3810	15718	25875	14997	8695	8155	25528
CDS	2086640	2087221	582	-	A11987;CDW43_RS09950superoxide dismutase [Fe];;	722	84549	97534	38071	1154	1245	2306	3146	35586	38259	13538	44481	69689	38278	31450	25920	66078
CDS	2087283	2087762	480	-	A11988;CDW43_RS09955ribosomal protein S18-alanine N-acetyltransferase;;	141	20506	27511	10027	506	627	864	938	10640	11718	1783	11513	16024	8256	4777	3904	13718
CDS	2087755	2088249	495	-	A11989;CDW43_RS09960DNA polymerase III subunit psi;;	39	8313	7555	2134	127	100	195	108	6085	6368	1056	10263	13931	7900	3583	3227	11484
CDS	2088249	2089781	1533	-	A11990;CDW43_RS099652-isopropylmalate synthase;;	112	18354	17999	5996	649	582	919	592	15825	17608	3391	22663	31478	15343	11429	9480	24013
CDS	2089948	2090691	744	-	A11991;CDW43_RS09970CDP-diacylglycerol--serine O-phosphatidyltransferase;;	72	8517	7682	2634	248	327	401	313	6032	6206	1175	11560	14185	7149	3729	3339	10395
CDS	2090809	2091819	1011	-	A11992;CDW43_RS09975ketol-acid reductoisomerase;;	238	43512	42948	12989	715	612	834	960	52671	46817	9658	39074	62958	34905	28583	27671	71791
CDS	2091848	2092345	498	-	A11993;CDW43_RS09980acetolactate synthase small subunit;;	97	20047	16922	7806	213	181	430	348	22290	17375	3754	15585	24941	15817	9963	10110	29170
CDS	2092345	2094087	1743	-	A11994;CDW43_RS09985acetolactate synthase 3 large subunit;;	274	62114	55729	26932	821	584	1461	1010	60351	51552	10657	37699	60424	35715	34802	29104	68342
CDS	2094259	2095305	1047	+	A11995;CDW43_RS09990dihydroorotase;;	66	15854	12129	3812	316	368	423	387	16441	17132	2540	13688	18408	9020	5653	4844	13696
CDS	2095343	2096614	1272	-	A11996;CDW43_RS09995O-acetylhomoserine aminocarboxypropyltransferase/cysteine synthase;;	82	27378	17245	5878	434	433	630	340	13352	14559	5169	37484	48677	24526	15882	14463	39334
CDS	2096765	2097442	678	+	A11997;CDW43_RS10000type 1 glutamine amidotransferase domain-containing protein;;	464	47083	91818	9859	1212	780	740	800	18279	31807	10226	29364	37349	17844	15897	11451	33714
CDS	2097476	2097757	282	+	A11998;CDW43_RS10005peptidylprolyl isomerase;;	761	39024	66268	6786	965	692	749	886	14938	20393	4684	30103	42222	22220	23645	17402	43622
[truncated: 1,217 more rows]

## Sheet: Annotations-TPM
		CDS: Coding sequence, main genome					PlkAN: Methylophaga-1403 medium, planktonic cultures anoxic conditions with 21.4 mM nitrate and 0.3% methanol C/N: 3											GenBank: CP021973.1, CP021974.1, CP021975.1
		PG-CDS: Coding sequence plasmid 1					PlkON: Methylophaga-1403 medium, planktonic culture oxic conditions with 21.4 mM nitrate and 0.3% methanol C/N: 3
		PP-CDS: Coding sequence plasmid 2					PlkO: Methylophaga-1403 medium, planktonic culture oxic conditions without nitrate and 0.3% methanol
		N-Cod: intergenic region					300N23C: Biofilm static culture in artificial seawater in vial, 21.4 mM nitrate, 0.15% methanol, 23°C
		Pseudo: Pseudogene					900N30C: Biofilm culture in artificial seawater in vial, 64.2 mM nitrate, 0.15% methanol, 30°C
							0%NaCl: Biofilm culture in artificial seawater in vial with 0% NaCl, 21.4 mM nitrate, 0.15% methanol, 23°C
							OB: Original Biofilm, IO medium
							Cond1: Recirculating reactor, IO medium, 10.7 mM nitrate, 0.075% methanol, C/N: 1.5
							Cond4: Recirculating reactor, IO medium, 21.4 mM nitrate, 0.3% methanol, C/N: 3
							Cond6: Recirculating reactor, IO medium, 21.4 mM nitrate, 0.75% methanol, C/N: 7.5
							Cond8: Recirculating reactor, IO medium, 42.8 mM nitrate, 0.6% methanol, C/N: 3
						Transcript per million (TPM)
	Start	End	length	Strand	Gene number	OB	300N23C	900N30C	0%NaCl	Cond1	Cond4	Cond6	Cond8	PlkAN1	PlkAN2	PlkAN3	PlkON1	PlkON2	PlkON3	PlkO1	PlkO2	PlkO3	Gene bank tag locus	Function
CDS	308	976	669	-	A10002	160.219	76.6592	91.1802	67.0427	77.006	76.4331	53.1063	58.1944	130.457	98.1176	73.5771	79.9672	102.189	110.16	159.687	144.188	146.769	CDW43_RS00010	7-cyano-7-deazaguanine synthase QueC
CDS	973	1614	642	-	A10003	114.397	110.937	117.408	99.1316	59.774	44.0604	45.2239	73.3691	179.478	118.679	95.8114	132.166	164.861	184.31	202.494	187.611	210.16	CDW43_RS00015	7-carboxy-7-deazaguanine synthase QueE
CDS	1638	2468	831	-	A10004	437.116	218.589	220.242	192.928	136.64	144.013	165.038	289.774	331.694	252.033	222.926	358.722	409.485	454.075	331.166	390.148	473.383	CDW43_RS00020	tol-pal system protein YbgF
CDS	2470	3039	570	-	A10005	442.258	240.046	265.008	362.233	326.477	248.13	344.491	688.921	429.208	346.172	325.759	353.034	383.102	364.866	502.256	475.407	443.27	CDW43_RS00025	peptidoglycan-associated lipoprotein Pal
CDS	3061	4362	1302	-	A10006	269.842	164.828	184.367	200.682	215.199	190.517	222.7	410.133	201.977	170.429	178.819	160.201	167.472	169.116	256.391	237.847	193.688	CDW43_RS00030	Tol-Pal system beta propeller repeat protein TolB
CDS	4374	5507	1134	-	A10007	33.2573	123.398	136.434	161.441	45.4295	23.0254	46.8265	66.1201	193.221	146.373	115.645	89.5596	96.1923	101.166	81.2449	89.5752	108.088	CDW43_RS00035	cell envelope integrity protein TolA
CDS	5514	5960	447	-	A10008	257.553	200.611	258.35	249.976	132.891	70.583	133.323	179.569	279.772	244.121	240.815	376.258	402.836	459.684	460.211	462.098	420.903	CDW43_RS00040	protein TolR
CDS	5975	6643	669	-	A10009	258.131	158.603	199.515	216.894	116.295	84.5643	142.759	129.321	229.023	192.506	213.32	235.962	257.273	293.551	322.205	309.93	266.185	CDW43_RS00045	protein TolQ
CDS	6633	7037	405	-	A10010	269.559	192.669	211.161	278.304	133.692	99.3932	194.313	191.07	289.841	245.306	208.124	206.486	247.779	257.989	336.184	316.205	270.437	CDW43_RS00050	tol-pal system-associated acyl-CoA thioesterase
CDS	7037	8050	1014	-	A10011	393.464	172.042	197.333	255.696	251.955	209.758	258.073	285.352	297.28	231.107	159.095	249.594	300.485	303.891	444.863	397.578	318.957	CDW43_RS00055	Holliday junction branch migration DNA helicase RuvB
CDS	8053	8649	597	-	A10012	179.542	84.9409	95.7251	124.924	119.754	102.964	118.382	169.875	142.197	116.539	70.6549	160.358	186.069	198.499	219.802	212.953	225.904	CDW43_RS00060	Holliday junction branch migration protein RuvA
CDS	8646	9185	540	-	A10013	187.466	127.049	132.909	164.795	99.2958	87.6406	76.4046	76.5468	185.652	160.527	106.59	182.633	213.303	246.902	234.006	250.182	246.089	CDW43_RS00065	crossover junction endodeoxyribonuclease RuvC
CDS	9200	9949	750	-	A10014	203.787	170.818	199.928	250.07	121.959	73.9808	165.543	124.967	290.899	260.723	186.928	210.73	240.846	242.684	311.524	318.476	249.534	CDW43_RS00070	YebC/PmpR family DNA-binding transcriptional regulator
CDS	9997	10926	930	-	A10015	239.046	157.371	214.218	246.477	189.359	131.607	257.557	203.11	241.837	247.248	197.341	244.27	253.829	248.219	298.806	312.073	237.802	CDW43_RS00075	branched-chain amino acid transaminase
CDS	10969	13776	2808	-	A10016	68.568	45.5461	53.6667	47.56	75.4453	66.0598	73.3299	71.0351	44.9449	49.5277	49.4923	76.0194	74.8902	67.0376	62.6486	60.153	61.7596	CDW43_RS00080	bifunctional [glutamate--ammonia ligase]-adenylyl-L-tyrosine phosphorylase/[glutamate--ammonia-ligase] adenylyltransferase
CDS	14136	14504	369	+	A10017	225.928	192.106	204.635	256.115	296.32	319.899	248.47	246.183	310.891	251.183	197.465	183.909	151.72	145.549	123.152	125.822	117.344	CDW43_RS00085	DUF6164 family protein
CDS	14594	16222	1629	-	A10018	918.749	647.276	479.547	342.113	656.379	491.883	757.714	1383.51	336.045	660.63	1079.42	282.222	383.325	553.192	1698.55	1607.73	1225.39	CDW43_RS00090	chaperonin GroEL
CDS	16280	16570	291	-	A10019	436.55	823.603	567.761	517.035	832.784	760.819	1495.27	1534.42	280.154	571.715	1460.63	179.118	218.375	283.618	992.447	1063.38	709.459	CDW43_RS00095	co-chaperone GroES
CDS	16718	17173	456	-	A10020	222	88.2213	143.961	47.8271	366.595	205.184	336.783	389.995	32.4108	88.9503	199.344	62.9469	54.8226	57.9191	170.354	133.821	81.4873	CDW43_RS00100	FxsA family protein
CDS	17402	18754	1353	+	A10021	58.6825	42.1026	48.9162	55.1935	2223.18	2401.46	5101.83	10292.1	45.5765	53.4391	175.637	34.3112	67.7613	30.8806	40.1606	39.8803	33.3211	CDW43_RS00105	porin
CDS	18848	20638	1791	+	A10022	28.8154	43.037	46.3622	47.8023	156.149	191.956	405.913	775.308	43.7473	49.1866	51.2358	48.397	49.3209	46.4953	38.5046	37.4156	44.0353	CDW43_RS00110	bifunctional diguanylate cyclase/phosphodiesterase
CDS	20672	21112	441	-	A10023	76.5168	67.6456	71.7248	53.6486	1493.61	1847.79	5531.1	7561.67	40.5402	47.2191	76.5839	78.2429	80.9245	61.495	58.9799	57.6829	58.7233	CDW43_RS00115	arsenate reductase (thioredoxin)
CDS	21267	21944	678	+	A10024	199.079	186.659	213.266	202.479	134.91	142.011	138.047	111.299	147.073	165.211	223.101	141.498	122.736	110.098	88.1541	89.5321	87.6406	CDW43_RS00120	TIGR04211 family SH3 domain-containing protein
CDS	21986	22531	546	-	A10025	1432.35	339.814	534.898	142.774	161.749	156.418	131.539	95.9524	95.6671	108.718	497.351	126.462	110.175	112.632	85.6473	97.7593	100.158	CDW43_RS00125	pyridoxamine 5'-phosphate oxidase family protein
CDS	23468	25252	1785	+	A10026	53.3765	48.4966	59.3393	65.69	69.7967	64.6067	76.1906	51.4301	63.5587	78.1591	64.7733	45.8112	45.3293	42.7565	54.1686	53.8935	42.5791	CDW43_RS00130	ABC transporter ATP-binding protein
CDS	25586	27439	1854	-	A10027	167.017	231.055	248.827	307.964	293.464	216.828	366.157	157.622	227.93	273.377	206.855	143.067	149.402	138.896	230.971	216.505	137.206	CDW43_RS00135	dihydroxy-acid dehydratase
CDS	27562	28857	1296	+	A10028	176.133	130.967	147.397	129.641	105.461	114.168	101.991	110.889	154.526	158.264	149.317	121.172	111.855	119.604	134.604	138.766	105.922	CDW43_RS00140	amino-acid N-acetyltransferase
CDS	28854	29369	516	-	A10029	323.129	189.373	207.204	170.887	281.18	254.066	219.885	183.501	158.311	169.358	219.893	145.375	136.917	121.614	201.001	167.109	112.633	CDW43_RS00145	RNA pyrophosphohydrolase
CDS	29518	30174	657	+	A10030	184.294	101.543	111.831	142.067	196.031	137.443	158.159	164.604	190.37	175.406	107.405	76.8592	75.2111	75.7937	110.691	107.66	81.857	CDW43_RS00150	HAD family hydrolase
CDS	30221	31663	1443	+	A10031	132.054	167.366	179.263	256.057	99.0894	95.3749	160.699	205.847	219.379	197.109	207.11	135.187	145.407	139.642	178.645	182.552	135.715	CDW43_RS00155	Asp-tRNA(Asn)/Glu-tRNA(Gln) amidotransferase subunit GatB
CDS	31871	33013	1143	+	A10032	310.852	229.469	163.072	210.795	398.287	503.047	614.98	1175.74	270.363	236.043	295.167	338.856	448.516	495.847	495.358	508.7	651.208	CDW43_RS00160	FIST N-terminal domain-containing protein
CDS	33033	34307	1275	-	A10033	333.158	169	187.736	205.975	213.16	176.632	197.753	279.715	194.686	225.233	238.063	184.187	184.285	177.09	206.58	186.153	182.817	CDW43_RS00165	glutamate--cysteine ligase
CDS	34956	35363	408	+	A10034	189.737	331.693	260.433	271.644	225.477	369.317	231.274	193.199	192.111	228.36	368.98	616.635	597.161	539.246	332.613	333.76	606.585	CDW43_RS00170	twitching motility response regulator PilG
CDS	35371	35742	372	+	A10035	181.419	268.528	233.987	228.662	96.0927	100.899	77.0208	80.1071	176.379	202.608	305.978	231.143	221.935	203.734	130.798	139.031	227.119	CDW43_RS00175	twitching motility response regulator PilH
CDS	35739	36287	549	+	A10036	285.628	241.817	220.018	194.784	128.309	110.975	87.6774	107.685	169.501	175.938	183.639	340.465	341.171	344.787	204.258	243.222	350.113	CDW43_RS00180	chemotaxis protein CheW
CDS	36312	37574	1263	+	A10037	237.312	170.912	161.656	153.842	68.2598	49.9614	88.927	80.2974	125.629	119.142	146.391	300.959	335.331	333.219	243.853	245.1	307.443	CDW43_RS00185	methyl-accepting chemotaxis protein
CDS	37603	43308	5706	+	A10038	121.058	92.4492	83.5964	82.25	35.2851	30.2209	26.2448	37.0632	88.5817	78.8189	69.3273	204.651	249.728	279.956	167.416	179.039	286.368	CDW43_RS00190	Hpt domain-containing protein
CDS	43331	43816	486	+	A10039	69.432	96.2271	89.4353	94.8247	43.2661	43.6524	43.2331	74.1732	75.5962	64.346	55.5943	158.656	200.196	248.008	137.693	147.515	285.256	CDW43_RS00195	chemotaxis protein CheW
CDS	43826	45769	1944	+	A10040	73.5162	59.6872	61.4954	71.3523	60.5726	55.6848	72.9067	70.4646	86.4636	65.7123	54.3375	56.1355	73.8095	88.2467	120.481	112.057	125.319	CDW43_RS00200	transglycosylase SLT domain-containing protein
CDS	45779	47020	1242	+	A10041	68.7217	73.7248	75.6362	70.082	47.8279	47.3023	44.9077	53.0177	93.1098	89.5025	79.6693	87.9151	88.8759	93.7034	137.668	127.033	107.609	CDW43_RS00205	multifunctional CCA addition/repair protein
CDS	47083	48066	984	+	A10042	221.893	134.927	141.04	135.588	101.504	119.409	164.223	168.518	241.193	212.815	221.491	150.069	155.853	159.833	200.425	210.892	184.648	CDW43_RS00210	methenyltetrahydromethanopterin cyclohydrolase
CDS	48076	49002	927	+	A10043	190.571	86.0377	87.2061	94.3514	50.4702	64.5495	86.5424	74.6629	134.199	106.523	91.1604	103.504	112.915	117.315	174.935	177.256	127.596	CDW43_RS00215	RimK family alpha-L-glutamate ligase
CDS	48992	49870	879	+	A10044	363.566	410.912	408.354	303.902	602.832	785.95	505.887	544.619	279.97	241.86	263.236	445.808	465.463	449.86	331.505	341.259	405.314	CDW43_RS00220	triphosphoribosyl-dephospho-CoA synthase
CDS	49989	50507	519	+	A10045	17133.9	2832.32	3623.97	2405.42	1763.42	2038.6	1763.64	3458.03	3373.07	2480.22	2153.54	1842.69	2295.79	2572.99	2481.84	2611.74	3010.24	CDW43_RS00225	formaldehyde-activating enzyme
CDS	50549	51244	696	-	A10046	179.671	138.865	157.928	160.685	86.1034	82.0654	71.9038	80.7977	70.7894	67.8291	48.7317	91.506	97.576	101.793	80.0754	78.5284	87.6736	CDW43_RS00230	HisA/HisF-related TIM barrel protein
CDS	51267	52262	996	+	A10047	45.8369	50.5458	57.0851	56.4688	100.809	126.709	156.108	132.708	56.7221	57.4176	51.4409	46.5968	45.7534	41.5129	47.6766	49.1834	38.8853	CDW43_RS00235	ATP-grasp domain-containing protein
CDS	52255	53298	1044	+	A10048	140.695	66.7973	81.4334	99.3518	125.379	120.363	194.671	146.403	71.824	66.9787	62.1535	82.2648	81.8032	82.3072	92.9977	92.1177	79.7914	CDW43_RS00240	hydantoinase/oxoprolinase family protein
CDS	53308	54693	1386	+	A10049	48.6925	38.4135	38.1544	48.1192	43.9966	32.5758	62.8436	45.4287	43.3304	41.3035	25.9748	51.82	54.6856	57.376	65.8799	65.5907	60.9304	CDW43_RS00245	aminodeoxychorismate synthase component I
CDS	54694	55269	576	+	A10050	24.1225	38.4802	38.197	43.4412	29.2046	27.3877	25.8661	17.5234	49.6617	42.8017	31.6876	44.7972	50.75	52.2234	59.6896	59.9614	56.9114	CDW43_RS00250	delta 1-pyrroline-5-carboxylate synthetase
CDS	55266	56447	1182	+	A10051	28.5482	35.8133	43.6406	39.5929	22.6818	15.6474	24.8864	26.4313	49.7752	43.5901	31.1265	25.2337	35.8566	39.8142	59.1864	59.2266	51.568	CDW43_RS00255	aminotransferase class V-fold PLP-dependent enzyme
CDS	56422	58125	1704	-	A10052	108.333	47.7817	58.0073	62.1084	35.786	34.7966	32.5078	51.9004	59.664	46.8235	49.1708	56.3596	74.8976	86.0831	122.055	115.692	128.111	CDW43_RS00260	AAA family ATPase
CDS	58134	59219	1086	-	A10053	188.258	111.919	140.752	131.669	100.199	81.6465	141.764	129.676	147.49	125.412	184.807	159.757	181.269	184.494	202.546	207.012	248.441	CDW43_RS00265	3-dehydroquinate synthase
CDS	59225	59752	528	-	A10054	169.171	174.312	197.978	194.048	136.399	162.781	197.523	204.819	169.64	145.609	217.753	166.935	180.028	172.925	145.048	160.117	208.825	CDW43_RS00270	shikimate kinase AroK
CDS	59845	62022	2178	-	A10055	232.396	114.401	187.866	189.971	185.365	202.555	105.591	175.22	121.398	103.128	122.272	360.523	402.824	393.592	241.532	251.746	369.514	CDW43_RS00275	type IV pilus secretin PilQ
CDS	62033	62581	549	-	A10056	231.395	120.87	201.806	233.386	75.6448	35.6706	76.5438	110.311	134.141	106.734	102.749	422.107	450.76	481.663	218.235	239.515	458.733	CDW43_RS00280	pilus assembly protein PilP
CDS	62581	63168	588	-	A10057	249.805	117.834	204.473	228.945	67.0515	44.4062	86.41	106.264	140.624	120.618	141.029	421.113	451.54	449.278	217.785	234.456	437.178	CDW43_RS00285	type 4a pilus biogenesis protein PilO
CDS	63171	63731	561	-	A10058	258.289	149.422	259.121	303.252	142.431	81.451	100.102	136.225	179.181	161.764	204.176	425.33	414.346	410.023	196.114	235.998	348.828	CDW43_RS00290	PilN domain-containing protein
CDS	63731	64789	1059	-	A10059	389.865	141.629	250.186	260.184	174.235	126.363	116.519	151.591	194.286	189.207	299.309	395.292	380.778	352.423	274.806	274.333	317.221	CDW43_RS00295	pilus assembly protein PilM
CDS	64978	67377	2400	+	A10060	72.781	106.53	128.099	127.22	66.8056	66.1838	85.0001	85.1138	135.297	135.272	105.812	50.8822	61.4793	71.4396	86.2022	91.638	93.1526	CDW43_RS00300	penicillin-binding protein 1A
CDS	67525	68622	1098	-	A10061	294.667	648.906	1011.02	66.4452	668.356	622.749	463.438	523.104	290.196	785.533	1219.89	152.958	123.606	110.873	85.1112	85.8663	63.9515	CDW43_RS16765	methyl-accepting chemotaxis protein
CDS	68726	69868	1143	+	A10062	336.901	267.383	410.232	61.2454	225.819	229.869	184.494	204.788	116.477	243.695	339.238	114.806	99.2467	85.0631	87.4058	78.6959	54.5506	CDW43_RS00310	NnrS family protein
CDS	69878	70315	438	+	A10063	1463.78	1388.19	1669.43	218.435	968.554	921.531	788.468	720.964	486.413	924.282	1444.72	405.469	363.237	345.445	309.888	284.748	213.785	CDW43_RS00315	Rrf2 family transcriptional regulator
CDS	70337	71011	675	-	A10064	2137.85	2101.28	2489.41	260.258	1116.01	1190.3	915.723	1257.5	597.707	1383.2	3836.29	332.066	279.27	238.056	152.953	152.812	110.684	CDW43_RS00320	iron-sulfur cluster repair protein YtfE
CDS	71900	73375	1476	-	A10065	238.031	408.965	331.819	534.613	298.101	274.568	398.329	307.077	252.205	183.804	161.925	189.728	176.786	170.574	231.483	225.447	187.695	CDW43_RS00325	M48 family metalloprotease
CDS	73403	73603	201	-	A10066	1115.91	2325.23	1893.52	3160	5217.61	5837.6	6674.95	5466.41	2388.73	1808.44	1351.73	881.363	825.412	889.683	1220.66	1290.6	1011.78	CDW43_RS00330	50S ribosomal protein L31
CDS	73727	74305	579	-	A10067	44.5668	116.342	129.835	103.472	255.125	304.401	185.403	151.913	58.9765	63.4137	87.3721	99.2585	88.0503	73.7736	74.2254	81.4925	79.3631	CDW43_RS00335	methyltransferase domain-containing protein
CDS	74302	75753	1452	-	A10068	103.895	68.2417	67.6505	73.4911	30.7735	41.2103	41.3069	56.6046	53.253	49.1183	66.0683	39.2937	36.8369	31.6238	68.0672	58.3847	42.4968	CDW43_RS00340	TrkH family potassium uptake protein
CDS	75760	77271	1512	-	A10069	98.4592	55.3989	61.4707	63.792	57.0186	59.7223	63.4178	128.426	58.8255	45.3154	47.8582	44.8243	48.9747	52.9566	97.3818	88.1395	64.3784	CDW43_RS00345	apolipoprotein N-acyltransferase
CDS	77271	78140	870	-	A10070	127.766	80.7579	88.6984	86.4696	164.956	175.073	258.195	516.553	85.8463	64.6706	72.7671	97.3986	102.877	111.774	194.014	188.067	138.128	CDW43_RS00350	transporter associated domain-containing protein
CDS	78137	78601	465	-	A10071	123.792	102.822	116.807	119.208	75.7437	66.681	83.7986	63.052	98.106	73.6584	87.1575	81.8528	81.8706	96.1865	136.732	137.483	116.05	CDW43_RS00355	rRNA maturation RNase YbeY
CDS	78598	79467	870	-	A10072	303.444	169.066	185.131	216.062	155.892	130.054	113.729	85.6317	167.155	136.088	155.528	111.982	111.396	115.696	248.595	221.149	135.202	CDW43_RS00360	PhoH family protein
CDS	79594	80934	1341	-	A10073	260.514	139.427	129.676	242.764	200.316	204.853	284.594	205.017	241.254	172.761	123.944	45.9883	55.0349	63.1059	185.972	198.259	95.4224	CDW43_RS00365	tRNA (N6-isopentenyl adenosine(37)-C2)-methylthiotransferase MiaB
CDS	81523	81957	435	+	A10074	734.655	412.939	494.919	558.956	497.889	502.709	404.857	902.724	278.174	264.417	470.963	361.037	331.725	304.834	454.235	396.318	306.776	CDW43_RS00370	heme-binding protein
CDS	82091	82849	759	-	A10075	1694.65	707.32	1111.2	2570.97	4555.23	2851.75	1952.39	7416.71	495.754	518.222	643.887	692.819	606.27	541.743	898.05	992.936	573.114	CDW43_RS00375	thrombospondin
riboswitch	82867	82946	80	.	Ribo01	2332.3	957.476	1390.49	3186.59	7845.83	5324.17	4321.64	13452	726.489	758.691	988.055	1310.81	1140.59	982.169	1535.01	1697.45	1042.12	riboswitch1	c-di-GMP
CDS	83161	84903	1743	+	A10076	118.436	82.0891	98.3934	69.1349	191.816	249.674	149.478	113.887	99.238	117.677	98.5324	117.946	112.505	107.999	136.562	131.167	116.859	CDW43_RS00380	30s ribosomal protein S12 methylthiotransferase accessory protein YcaO
CDS	84987	86561	1575	-	A10077	103.343	54.3186	62.2394	64.3518	76.7665	81.5101	78.1025	124.814	39.2943	52.2332	57.9431	93.6535	82.8707	73.5546	68.4935	66.2477	67.9187	CDW43_RS00385	cation:proton antiporter
CDS	86717	87013	297	-	A10078	93.5661	59.8364	70.083	85.0144	138.058	163.01	118.337	296.153	48.7086	58.5018	77.4234	132.145	115.002	108.868	79.5232	74.002	91.4153	CDW43_RS00390	DUF1840 domain-containing protein
CDS	87261	87581	321	-	A10079	74.2033	99.0598	110.99	116.37	83.5198	127.097	176.135	324.92	83.7752	91.295	136.554	173.732	152.751	137.33	93.1362	87.126	107.828	CDW43_RS00395	hypothetical protein
CDS	87698	87973	276	-	A10080	115.069	161.523	170.344	155.921	262.842	340.971	380.639	445.813	116.975	129.362	208.025	284.17	243.687	232.846	164.197	156.737	187.24	CDW43_RS00400	DUF1971 domain-containing protein
CDS	88106	88717	612	-	A10081	71.3539	84.0725	109.332	67.0294	165.779	173.326	116.729	94.2436	36.0778	49.5397	72.4456	140.581	94.1549	75.9757	86.7916	73.9631	54.8713	CDW43_RS00405	uracil-DNA glycosylase family protein
CDS	88758	89012	255	-	A10082	93.4088	173.389	243.561	108.18	457.654	420.248	338.577	273.307	62.9828	88.1643	195.004	216.275	135.75	97.3246	112.552	102.494	64.5789	CDW43_RS00410	DUF1488 family protein
CDS	89199	90485	1287	+	A10083	55.5227	32.1925	34.7297	32.4289	55.9586	70.5859	56.9918	53.7782	35.6893	39.8513	37.5205	50.8086	46.156	43.6941	54.8803	55.5015	41.8396	CDW43_RS00415	MgtC/SapB family protein
CDS	90724	92187	1464	-	A10084	52.8774	48.5844	40.7104	34.1389	61.4016	41.2441	51.928	69.2729	46.9446	48.4451	66.3612	54.1416	52.9637	49.7787	61.9955	57.3302	41.7138	CDW43_RS00420	phospholipase D family protein
CDS	92499	94337	1839	+	A10085	41.0156	32.8871	31.6966	38.8602	100.334	120.686	217.913	527.426	22.8622	24.4741	41.263	52.1537	47.0512	47.881	34.1669	39.1898	42.781	CDW43_RS00425	fibronectin type III domain-containing protein
CDS	94553	95608	1056	+	A10086	39.4732	21.118	25.2244	24.4942	33.353	73.6634	105.273	106.961	20.9511	23.4159	33.8878	25.9038	23.8243	26.1993	25.2442	25.0527	27.6918	CDW43_RS00430	phosphate ABC transporter substrate-binding protein PstS
CDS	95670	96677	1008	-	A10087	21.661	23.898	31.8017	34.1283	25.0326	32.3795	33.7302	35.7621	19.3326	24.5455	23.5964	27.0747	25.1872	25.9939	26.1003	26.9668	23.1089	CDW43_RS00435	YihY/virulence factor BrkB family protein
CDS	96745	97143	399	-	A10088	54.7226	47.2663	53.4298	55.5542	55.3351	40.9005	41.1704	38.5478	47.384	53.0723	56.5503	29.2372	29.2076	28.6394	21.3548	22.6603	31.365	CDW43_RS00440	DUF1801 domain-containing protein
CDS	97314	98261	948	-	A10089	14.6567	35.0871	36.1648	36.9045	35.4892	36.7241	31.0293	28.8994	26.3867	28.0959	46.7687	52.5214	49.0976	47.4008	39.8413	38.2109	45.1257	CDW43_RS00445	malate dehydrogenase
CDS	98362	98700	339	-	A10090	117.105	43.6602	52.6476	54.2816	72.8824	62.5813	65.3609	66.6377	44.2561	43.4186	69.3149	64.5085	67.9967	62.574	61.2927	63.2042	79.8905	CDW43_RS00450	hypothetical protein
CDS	98876	99418	543	-	A10091	18.2775	40.5298	48.8695	54.4488	36.7882	45.0809	36.5842	33.6361	50.6769	53.8619	76.755	36.7197	40.9017	44.2822	46.7079	42.9926	51.0838	CDW43_RS00455	hypothetical protein
CDS	99568	100083	516	-	A10092	38.4678	51.5293	55.3325	54.782	61.126	43.2229	27.3931	77.3126	56.7357	58.5288	70.8837	40.8652	43.9515	43.605	50.9866	46.1437	49.0855	CDW43_RS00460	phosphate-starvation-inducible PsiE family protein
CDS	100284	101009	726	-	A10093	128.501	40.8312	51.8194	36.3879	21.7225	25.4755	31.0459	68.8524	60.5381	63.5304	58.8923	91.2685	97.9473	102.819	78.8255	86.8962	99.2168	CDW43_RS00465	MOSC domain-containing protein
CDS	101548	102711	1164	-	A10094	378.57	183.804	207.1	135.588	144.518	182.727	147.361	218.849	147.053	166.013	191.993	321.03	305.659	288.347	210.72	232.003	239.189	CDW43_RS00470	cytochrome P450
CDS	103206	103880	675	+	A10095	11.7626	35.1764	46.5616	21.8284	14.797	4.02945	13.0171	14.9533	23.7935	28.3931	59.0837	39.4227	44.3038	49.8811	44.9927	41.907	45.9219	CDW43_RS00475	DNA repair protein RadC
CDS	104007	105041	1035	+	A10096	138.083	493.709	488.349	175.911	23.8716	16.293	32.4812	23.6838	29.1349	30.1154	565.079	19.2767	20.158	18.4582	48.0466	43.6785	22.9253	CDW43_RS16565	TonB-dependent receptor
CDS	105060	106043	984	+	A10097	44.3787	178.361	175.813	61.0823	27.2458	45.3314	49.3058	26.3767	20.9851	27.2618	117.573	20.3015	18.755	15.8983	26.0786	24.7882	16.0397	CDW43_RS16570	TonB-dependent receptor
CDS	106115	107251	1137	+	A10098	41.8984	59.3925	87.7714	48.9523	19.4184	19.1372	19.4875	16.0637	29.0108	38.6941	52.0769	43.6356	44.2775	40.1302	47.7681	53.1328	33.7918	CDW43_RS00485	PepSY-associated TM helix domain-containing protein
CDS	107260	107994	735	-	A10099	172.838	193.16	227.727	212.122	90.8324	65.1291	64.4501	141.25	104.513	102.764	191.232	211.856	216.11	173.536	193.074	185.469	168.247	CDW43_RS00490	cytochrome b/b6 domain-containing protein
CDS	108092	108523	432	-	A10100	59.7319	240.07	268.306	208.998	155.758	141.031	73.3979	141.3	99.358	92.5332	123.091	99.0529	104.995	109.122	139.622	127.931	124.424	CDW43_RS00495	hemerythrin domain-containing protein
CDS	108525	109358	834	-	A10101	76.1607	227.999	260.008	234.961	153.167	176.76	128.257	174.046	89.7484	84.3541	129.587	74.8072	88.417	87.3042	103.031	110.537	104.472	CDW43_RS00500	thymidylate synthase
CDS	109486	110424	939	-	A10102	54.961	350.402	359.105	271.488	36.3892	60.2487	77.2996	59.8884	78.9035	80.9384	138.513	57.7927	62.6864	65.6465	86.5487	85.7924	79.5857	CDW43_RS00505	sigma-54 dependent transcriptional regulator
CDS	110467	111195	729	-	A10103	103.467	370.101	320.173	298.809	56.9671	70.8885	114.764	100.876	62.8027	63.7521	141.844	79.4577	78.7156	74.865	92.9573	90.2873	84.8422	CDW43_RS00510	sulfite exporter TauE/SafE family protein
CDS	111624	112028	405	+	A10104	382.284	5865.02	8462.73	7346.32	306.324	252.512	539.549	134.105	128.348	143.705	4403.95	111.199	90.7635	74.1143	203.556	180.535	86.797	CDW43_RS00515	cytochrome c
CDS	112077	112610	534	-	A10105	219.31	1374.19	2011.25	1169.02	358.331	426.828	467.871	558.949	78.845	80.1621	1003.33	119.526	101.158	100.546	128.395	125.381	98.9785	CDW43_RS00520	hypothetical protein
CDS	112666	114171	1506	-	A10106	159.48	108.697	217.019	126.218	99.831	113.78	100.199	166.597	73.721	62.071	118.428	47.8501	52.9272	60.7766	101.74	106.946	80.8065	CDW43_RS00525	exopolyphosphatase
CDS	114306	115022	717	-	A10107	71.9782	74.0802	80.7505	106.008	387.114	597.084	205.131	1442.6	82.8873	84.9177	75.1658	117.233	115.961	110.215	102.574	110.004	113.048	CDW43_RS00530	phosphate signaling complex protein PhoU
CDS	115046	115888	843	-	A10108	49.4468	38.8866	41.8382	51.2798	97.2795	111.635	51.2083	627.743	51.6412	54.9219	50.0367	85.2138	90.0572	90.5723	67.2055	75.836	90.8448	CDW43_RS00535	phosphate ABC transporter ATP-binding protein PstB
CDS	115888	117555	1668	-	A10109	46.4104	33.2611	35.8858	44.0309	91.0807	92.6195	65.7318	346.074	31.9139	34.1182	33.129	45.093	44.5801	43.7389	45.9444	45.8916	42.2825	CDW43_RS00540	phosphate ABC transporter permease PstA
CDS	117568	119844	2277	-	A10110	33.1259	38.2566	42.5986	51.6101	133.672	141.429	403.33	495.418	34.9661	42.5165	44.5921	50.9501	45.0087	43.5054	49.1276	47.1769	36.6901	CDW43_RS00545	ABC transporter permease subunit
CDS	120000	120956	957	-	A10111	43.5566	64.0275	62.7108	110.351	2620.18	3952.78	9232.82	16415.7	46.2835	47.3215	196.579	51.5135	115.371	50.6044	44.3608	47.4208	60.6092	CDW43_RS00550	PstS family phosphate ABC transporter substrate-binding protein
CDS	121098	122387	1290	-	A10112	121.558	57.7242	76.9968	62.342	264.879	209.578	808.467	226.163	45.7466	57.9031	77.3733	71.4164	68.2217	62.1573	80.4198	75.4525	59.0596	CDW43_RS00555	phosphate regulon sensor histidine kinase PhoR
CDS	122400	123092	693	-	A10113	80.1995	71.7252	86.1483	79.4259	738.081	1046.35	2284.42	996.657	52.6071	63.5276	95.5003	86.6427	76.4027	64.262	75.317	70.6039	61.633	CDW43_RS00560	phosphate regulon transcriptional regulator PhoB
CDS	123174	124397	1224	-	A10114	37.2987	32.8326	27.7996	31.2079	58.4093	43.5537	153.246	62.8291	32.7305	30.7525	25.8902	20.7513	25.626	26.2588	51.7615	39.523	33.3907	CDW43_RS00565	organoarsenical effux MFS transporter ArsJ
CDS	124456	126105	1650	-	A10115	133.532	73.0674	63.7736	75.7656	84.1094	76.4864	43.9905	13.9823	89.5898	93.9814	70.944	32.1555	37.1985	38.1294	107.054	84.8732	45.5603	CDW43_RS00570	inorganic phosphate transporter
CDS	126242	128080	1839	+	A10116	105.777	68.2313	67.9838	71.5614	82.8974	104.122	114.046	86.7718	53.4208	69.2328	62.4415	105.192	88.478	79.8951	77.5597	71.566	57.5866	CDW43_RS00575	protein-disulfide reductase DsbD
CDS	128216	128653	438	+	A10117	457.714	145.34	136.61	188.352	262.842	303.037	296.548	299.579	134.427	112.306	109.1	113.676	130.932	141.544	153.977	138.591	132.339	CDW43_RS00580	type II 3-dehydroquinate dehydratase
CDS	128663	129130	468	+	A10118	339.305	176.053	175.989	252.767	192.077	162.728	167.339	173.565	168.882	147.909	172.276	161.012	182.654	194.269	190.9	206.425	192.129	CDW43_RS00585	acetyl-CoA carboxylase biotin carboxyl carrier protein
CDS	129185	130525	1341	+	A10119	266.435	128.39	133.567	145.692	50.9611	38.1311	79.1964	82.0784	205.569	173.943	129.731	196.433	249.123	262.745	330.012	335.165	246.278	CDW43_RS00590	acetyl-CoA carboxylase biotin carboxylase subunit
CDS	130537	131406	870	+	A10120	271.503	82.2487	87.9004	82.5155	21.7524	24.3851	33.3721	42.5396	194.451	124.871	83.6698	153.426	208.023	232.076	325.227	324.172	238.953	CDW43_RS00595	50S ribosomal protein L11 methyltransferase
CDS	131399	132400	1002	+	A10121	261.489	125.885	127.108	106.788	160.013	227.471	107.515	63.7979	171.259	135.413	100.329	219.254	232.886	232.535	294.84	281.118	224.554	CDW43_RS00600	tRNA dihydrouridine synthase DusB
CDS	132397	132687	291	+	A10122	341.054	403.48	418.125	361.791	424.521	536.499	254.682	132.135	358.896	336.261	334.105	362.874	342.2	315.696	289.549	310.603	295.108	CDW43_RS00605	DNA-binding transcriptional regulator Fis
CDS	132717	134282	1566	+	A10123	275.052	107.986	133.681	125.713	111.783	91.7048	68.5495	38.0585	197.572	165.519	93.4712	203.959	233.596	258.273	280.274	285.858	268.736	CDW43_RS00610	bifunctional phosphoribosylaminoimidazolecarboxamide formyltransferase/IMP cyclohydrolase
CDS	134296	136929	2634	+	A10124	135.645	54.7538	65.6116	74.5434	54.4843	60.3041	59.6095	52.5532	84.1874	68.505	52.8709	81.3764	88.8913	98.9686	99.5422	98.9934	103.56	CDW43_RS00615	class I adenylate cyclase
CDS	136983	138011	1029	+	A10125	482.249	236.167	258.296	212.734	303.967	261.68	272.874	319.494	206.813	248.332	353.846	326.931	272.731	242.935	319.16	303.973	206.996	CDW43_RS00620	N-acetyl-gamma-glutamyl-phosphate reductase
CDS	138011	138715	705	+	A10126	36.6017	123.383	120.321	128.297	87.9868	66.3574	93.7446	124.763	108.495	113.423	106.208	125.936	111.667	106.544	80.5727	94.4743	97.3172	CDW43_RS00625	hypothetical protein
CDS	138724	139161	438	+	A10127	77.0409	166.977	164.576	146.71	192.031	196.229	172.695	242.516	132.42	136.764	135.022	195.047	183.843	184.058	134.126	137.462	174.185	CDW43_RS00630	polymer-forming cytoskeletal protein
CDS	139312	139656	345	+	A10128	3803.02	2653.94	3097.1	977.386	5457.97	7309.78	3450.39	6673.27	722.082	1548.94	2622.52	2895.17	2234.1	1948.37	769.082	760.596	693.459	CDW43_RS00635	iron-sulfur cluster insertion protein ErpA
CDS	139785	141074	1290	+	A10129	93.8614	68.1436	68.6557	63.2981	111.657	91.9278	70.1856	58.1242	65.8191	67.6523	66.2881	72.8731	70.2399	70.3294	56.6647	56.2288	58.9549	CDW43_RS00640	DUF2254 domain-containing protein
CDS	141153	141779	627	+	A10130	66.4811	82.6451	105.181	97.8799	97.2557	103.243	81.0352	59.0263	76.0609	68.5061	151.052	43.1648	47.3565	55.5993	65.1259	60.4628	44.363	CDW43_RS00645	TetR/AcrR family transcriptional regulator
CDS	141783	142955	1173	+	A10131	43.9969	34.5008	44.4049	50.853	53.7784	55.6497	70.3469	103.258	60.534	45.4383	74.8603	26.696	33.0666	36.5248	47.534	43.3233	33.7246	CDW43_RS00650	efflux RND transporter periplasmic adaptor subunit
CDS	142958	146104	3147	+	A10132	54.2436	27.0954	36.2122	28.824	33.0745	40.1025	47.1004	122.184	67.6186	44.5795	59.5054	34.8971	44.5055	50.6362	68.8438	68.2324	48.1154	CDW43_RS00655	efflux RND transporter permease subunit
CDS	146101	147543	1443	+	A10133	85.2849	26.9726	41.5589	35.0405	37.5228	62.578	35.4755	193.856	103.422	57.5808	77.6849	58.0147	72.458	88.927	112.173	112.642	96.6819	CDW43_RS00660	efflux transporter outer membrane subunit
CDS	147623	147802	180	+	A10134	1598.98	261.556	245.954	269.549	1022.16	1109.11	677.03	1121.5	270.325	218.411	309.79	448.409	468.309	488.559	998.772	788.987	544.903	CDW43_RS00665	PLDc N-terminal domain-containing protein
CDS	147993	150053	2061	+	A10135	110.756	71.7274	72.1401	62.6249	49.4821	47.7728	53.0124	57.8357	70.9288	64.1465	71.0566	51.4006	59.8746	68.6185	78.4529	76.6654	68.8094	CDW43_RS00670	BCCT family transporter
CDS	150538	151455	918	+	A10136	73.5162	36.4844	62.1428	32.242	12.5981	13.629	11.236	17.278	19.2318	19.9661	59.4125	11.9384	11.1321	10.5193	14.5467	12.6676	11.784	CDW43_RS00675	LysR family transcriptional regulator
CDS	151542	152948	1407	+	A10137	210.203	144.186	199.678	209.21	330.28	355.305	181.101	190.959	82.8472	99.8454	120.122	65.0923	54.4296	49.5419	99.8151	96.5974	42.3073	CDW43_RS00680	diguanylate cyclase
CDS	152902	153456	555	-	A10138	221.741	151.188	187.983	226.185	161.02	148.001	154.874	182.731	88.5053	101.349	113.549	146.703	125.876	119.68	105.895	116.394	98.812	CDW43_RS00685	lactoylglutathione lyase
CDS	153483	154436	954	-	A10139	174.774	63.1762	78.3768	69.6368	103.043	107.199	126.14	157.695	60.7341	68.2673	81.8012	79.5689	73.4153	58.8446	66.0454	66.3114	64.5089	CDW43_RS00690	magnesium/cobalt transporter CorA
CDS	154817	155440	624	-	A10140	47.7148	25.4793	28.7274	31.6219	35.3826	54.0489	37.3452	46.2156	61.5758	39.0154	39.384	16.4516	17.8955	27.1079	57.8929	58.7035	42.614	CDW43_RS00695	methyltransferase
CDS	155459	156817	1359	-	A10141	96.3987	39.6769	45.3882	46.0901	25.5299	15.6108	21.6452	29.0012	87.8235	49.5209	56.313	25.2973	38.7844	55.792	153.205	146.623	99.444	CDW43_RS00700	tRNA uridine-5-carboxymethylaminomethyl(34) synthesis GTPase MnmE
CDS	156875	158518	1644	-	A10142	245.099	105.446	94.3614	180.472	69.7074	57.5741	134.08	95.8946	256.329	154.193	148.438	54.0515	75.4172	103.655	240.91	235.602	178.596	CDW43_RS00705	membrane protein insertase YidC
CDS	158511	158747	237	-	A10143	745.398	340.235	264.847	651.273	286.132	438.394	728.584	421.83	600.153	453.249	335.643	180.233	282.068	383.688	858.111	834.384	610.463	CDW43_RS00710	membrane protein insertion efficiency factor YidD
CDS	158732	159085	354	-	A10144	1031.72	882.18	695.555	1705.03	638.542	623.882	1183.84	741.33	1397.43	1076.99	866.768	245.461	366.903	462.15	1208.47	1113.28	701.43	CDW43_RS00715	ribonuclease P protein component
CDS	159114	159248	135	-	A10145	3117.09	1439.75	1326.43	3161.99	2788.07	2433.79	3622.14	2616.83	2758.77	1975.02	1703.85	620.673	868.955	1003.35	2625.93	2443.57	1700.04	CDW43_RS00720	50S ribosomal protein L34
CDS	159514	160878	1365	+	A10146	132.329	113.205	114.067	163.84	160.979	177.739	126.222	161.271	169.614	150.157	108.867	69.6913	78.5318	86.2148	103.452	111.646	124.393	CDW43_RS00725	chromosomal replication initiator protein DnaA
CDS	160893	161996	1104	+	A10147	208.562	129.148	143.924	166.592	118.565	96.0828	151.563	178.499	143.101	108.918	121.457	98.4589	105.271	121.278	154.922	168.008	155.617	CDW43_RS00730	DNA polymerase III subunit beta
CDS	162062	163264	1203	-	A10148	163.349	91.6005	93.3709	71.0321	73.8492	51.0967	66.3697	80.3068	144.502	146.2	78.1902	111.323	116.299	111.551	121.608	114.065	101.736	CDW43_RS00735	heme biosynthesis HemY N-terminal domain-containing protein
CDS	163261	164295	1035	-	A10149	155.343	175.838	225.513	174.374	158.467	168.711	167.573	176.468	219.994	241.292	195.997	182.763	185.495	169.482	196.206	184.236	148.329	CDW43_RS00740	uroporphyrinogen-III C-methyltransferase
CDS	164285	165052	768	-	A10150	139.566	135.407	160.909	125.083	197.816	205.408	210.909	217.165	132.36	152.5	128.279	225.529	203.008	176.034	208.33	195.556	147.647	CDW43_RS00745	uroporphyrinogen-III synthase
CDS	165042	165971	930	-	A10151	275.33	94.0381	116.566	80.4024	233.449	238.648	238.662	251.691	85.9789	114.685	153.298	296.805	237.832	204.729	253.452	237.485	153.299	CDW43_RS00750	hydroxymethylbilane synthase
CDS	166091	167473	1383	+	A10152	94.7258	60.899	62.5169	103.393	81.3422	97.546	122.093	104.956	114.082	103.233	89.0048	89.2199	83.1124	83.3006	105.438	112.274	76.9295	CDW43_RS00755	argininosuccinate lyase
CDS	167565	168929	1365	+	A10153	20.3583	26.7973	29.3165	35.9729	9.24279	7.97035	10.0753	4.92967	27.9525	21.5876	14.6349	13.9235	16.9066	20.0327	22.1396	23.6624	24.2485	CDW43_RS00760	DUF5924 family protein
CDS	168926	169141	216	-	A10154	55.1371	67.7474	75.9405	38.3139	12.1686	15.1105	12.3804	13.3512	33.7286	28.8742	27.945	24.8727	31.3222	39.3422	30.335	37.417	43.1634	CDW43_RS00765	hypothetical protein
CDS	169168	169518	351	-	A10155	163.998	36.3267	42.0115	13.407	14.9767	9.29874	14.149	16.4322	11.4604	12.3336	12.8977	15.5219	17.8624	22.6516	32.9346	31.06	23.9251	CDW43_RS00770	DUF3325 domain-containing protein
CDS	169518	171161	1644	-	A10156	255.965	102.894	131.507	21.6361	10.8718	12.2428	10.2245	9.64793	21.3056	23.9136	98.6088	13.7699	15.4594	18.6301	34.4461	29.868	18.978	CDW43_RS00775	PepSY-associated TM helix domain-containing protein
CDS	171158	171439	282	-	A10157	549.025	244.992	343.961	45.6889	27.9619	52.0828	32.5126	37.4969	52.1448	56.774	524.924	41.8595	44.0891	47.0851	66.7022	57.2166	44.1729	CDW43_RS00780	DUF3649 domain-containing protein
CDS	171975	174056	2082	-	A10158	99.1515	41.3373	73.924	16.2738	15.1494	20.9021	24.404	17.3142	14.8627	19.3127	57.8803	15.301	16.8646	16.7362	24.6866	23.3192	17.7038	CDW43_RS00785	TonB-dependent siderophore receptor
CDS	174064	174306	243	-	A10159	506.445	199.643	290.146	57.8297	86.5323	96.2592	73.8892	53.4047	52.9725	61.5982	404.241	50.6018	45.4801	50.0056	75.9721	72.3814	47.7709	CDW43_RS00790	sigma factor
CDS	174543	175442	900	+	A10160	46.3152	81.0063	71.3229	52.1429	57.2411	47.1446	62.3971	72.6304	35.6406	39.7363	38.9633	39.5581	38.118	36.5346	43.018	39.6351	34.495	CDW43_RS00795	IS982 family transposase
CDS	175608	177152	1545	+	A10161	23.1255	20.3309	19.096	3.86508	24.1576	13.7314	24.9737	8.71067	25.043	43.0463	60.417	29.1575	31.5015	36.408	34.7021	32.7227	29.5859	CDW43_RS00800	Fic family protein
CDS	177218	177400	183	+	A10162	86.7732	40.8109	24.3513	5.32034	37.3436	35.6706	56.364	18.3852	43.5558	57.0956	62.4345	33.8375	35.7608	39.049	43.1569	46.0707	40.2518	CDW43_RS00805	HigA family addiction module antitoxin
CDS	177621	179969	2349	-	A10163	75.2062	48.5102	25.8444	5.87186	29.5403	27.0946	18.7027	16.7785	54.5835	60.6923	57.6337	43.1229	38.6453	38.9448	38.002	38.8001	41.5088	CDW43_RS00810	TonB-dependent siderophore receptor
CDS	180186	181184	999	-	A10164	298.039	40.7508	65.1403	13.7743	11.5766	6.53425	15.2962	12.9903	8.17256	10.6499	48.3373	6.93065	7.49926	7.92644	12.22	10.9421	7.05496	CDW43_RS00815	FecR domain-containing protein
CDS	181181	181690	510	-	A10165	521.532	71.7838	116.138	19.9815	39.1686	28.7987	29.9626	25.4458	18.813	24.6308	240.233	18.126	17.0512	18.9347	28.6266	29.8703	15.294	CDW43_RS00820	sigma-70 family RNA polymerase sigma factor
CDS	181898	183298	1401	-	A10166	97.7592	28.4755	33.654	33.5197	42.7751	45.0401	39.2657	57.2929	30.1054	34.0947	33.2365	28.5537	25.7195	26.4451	28.2749	26.2086	28.2224	CDW43_RS16475	TonB-dependent siderophore receptor
CDS	183305	184324	1020	-	A10167	167.357	29.0007	32.4924	27.2042	25.7688	34.6652	22.8465	26.8594	18.2142	22.4727	27.6867	15.8015	18.3014	19.5659	22.5691	22.4027	18.9804	CDW43_RS16480	TonB-dependent siderophore receptor
CDS	184400	185353	954	-	A10168	114.436	44.9207	63.2953	24.3576	21.4902	27.9401	15.6173	24.1833	15.0235	18.1359	43.6876	14.026	14.4064	16.4488	19.9781	20.9356	18.0297	CDW43_RS00830	FecR domain-containing protein
CDS	185359	185856	498	-	A10169	163.419	62.7386	83.6829	29.6518	63.3354	57.8931	62.1363	81.0722	23.694	29.5855	106.922	34.9476	29.8562	28.9896	44.675	46.8775	31.2476	CDW43_RS00835	sigma-70 family RNA polymerase sigma factor
CDS	186009	188456	2448	-	A10170	333.255	32.8026	45.4957	26.3822	29.6341	24.6656	35.1124	42.8023	21.1367	24.602	30.5281	19.4324	21.9109	25.7131	40.017	37.5278	30.7007	CDW43_RS00840	TonB-dependent receptor
CDS	188791	189732	942	-	A10171	223.358	128.75	182.356	78.8614	39.0635	56.592	61.2372	47.9622	51.1643	59.5718	163.551	53.7797	54.9756	53.153	72.1763	67.9894	53.6319	CDW43_RS00845	FecR domain-containing protein
CDS	189746	190237	492	-	A10172	112.964	210.644	249.354	108.642	55.5601	72.9724	71.4352	76.1994	61.8955	75.6412	361.776	63.237	60.4226	53.6157	45.7262	50.0491	52.401	CDW43_RS00850	sigma-70 family RNA polymerase sigma factor
CDS	190727	191182	456	-	A10173	82.7057	103.361	114.177	111.597	117.587	157.467	148.285	123.323	35.4493	43.4775	75.0102	120.086	96.7503	77.6491	45.2384	52.0877	71.1692	CDW43_RS00855	TerB family tellurite resistance protein
CDS	191235	192365	1131	-	A10174	82.4863	37.1878	33.2634	46.7155	24.6342	22.1246	51.6795	53.5464	23.1184	26.9623	37.9942	64.0946	62.2313	67.6227	69.0365	70.3542	72.6392	CDW43_RS00860	GNAT family N-acetyltransferase/peptidase C39 family protein
CDS	192349	193419	1071	-	A10175	88.9608	37.0639	33.6005	42.0903	89.3319	84.3138	69.556	75.3949	31.522	42.2159	59.1105	62.198	55.2663	48.4489	59.6678	60.696	54.6169	CDW43_RS00865	DUF2817 domain-containing protein
CDS	193587	195071	1485	+	A10176	34.7531	30.7529	32.3535	47.796	61.2413	53.1155	43.9905	43.0474	47.3241	42.1668	34.5018	39.4821	34.5216	37.5647	37.8994	38.9783	43.4872	CDW43_RS00870	RimK family alpha-L-glutamate ligase
CDS	195149	197206	2058	-	A10177	54.9764	67.7507	113.724	100.012	63.8586	74.539	64.7843	81.7419	165.513	113.399	151.189	163.19	184.133	204.466	196.091	200.256	190.313	CDW43_RS00875	TonB-dependent receptor
CDS	197359	198252	894	+	A10178	153.2	145	377.068	116.13	406.905	236.697	230.752	130.107	95.3739	191.857	324.81	84.3025	84.6028	86.8637	208.898	171.506	113.142	CDW43_RS00880	DnaJ C-terminal domain-containing protein
CDS	198274	199659	1386	+	A10179	105.978	111.444	180.916	111.178	132.748	93.0176	150.494	135.593	66.7854	132.773	158.597	73.0576	72.058	76.6987	135.607	122.162	85.1802	CDW43_RS00885	DegQ family serine endoprotease
CDS	199771	200247	477	-	A10180	33.2903	115.279	147.177	129.272	155.391	269.137	109.721	59.4505	79.084	120.506	683.635	67.4201	65.3674	62.2524	58.2892	57.9616	59.203	CDW43_RS00890	nuclear transport factor 2 family protein
CDS	200349	200924	576	+	A10181	13.7843	44.037	41.7932	26.5943	40.1564	21.7213	25.8661	26.7024	45.8337	54.8269	76.1002	25.6171	22.7384	21.9903	24.9572	22.107	23.0993	CDW43_RS00895	TetR/AcrR family transcriptional regulator
CDS	201078	201449	372	+	A10182	69.3661	103.643	63.8693	19.9785	425.352	413.831	207.443	55.5581	126.397	130.93	207.656	118.419	90.6261	79.9102	74.139	72.9931	75.1619	CDW43_RS00900	hypothetical protein
CDS	201727	202206	480	+	A10183	165.411	242.54	118.475	81.6761	212.464	179.059	148.83	132.177	276.802	286.099	531.154	186.309	180.8	171.876	284.901	242.026	211.731	CDW43_RS00905	bacterioferritin
NCodA	202501	202900	400	.	Ncod194	1637.57	1817.81	593.536	188.883	2182.9	2242.54	1526.18	1216.03	1451.75	1507.99	1018.95	616.577	552.982	603.867	568.723	492.992	516.397	NCod400Ncod
CDS	202914	203828	915	-	A10184	39.0479	213.405	89.9529	19.8981	452.145	613.534	244.244	185.428	161.979	151.352	170.026	121.071	96.0072	95.0897	68.806	71.2666	96.383	CDW43_RS00910	type II toxin-antitoxin system PemK/MazF family toxin
CDS	203862	205229	1368	-	A10185	44.9803	64.2429	69.0954	56.4863	34.9687	41.7526	61.995	57.6209	94.0851	64.6638	73.1192	52.9075	49.4044	50.4131	61.7567	64.1374	61.422	CDW43_RS00915	bifunctional UDP-N-acetylglucosamine diphosphorylase/glucosamine-1-phosphate N-acetyltransferase GlmU
CDS	205325	205747	423	-	A10186	248.704	666.122	845.257	404.64	104.391	83.5897	102.053	222.709	1394.12	832.443	660.317	253.005	366.446	398.444	705.247	779.108	577.941	CDW43_RS00920	F0F1 ATP synthase subunit epsilon
CDS	205766	207142	1377	-	A10187	2933.44	481.514	612.899	280.703	187.826	167.499	124.567	252.014	1193.42	679.115	647.666	448.501	648.954	778.989	1264.82	1418.46	1085.68	CDW43_RS00925	F0F1 ATP synthase subunit beta
CDS	207193	208059	867	-	A10188	425.834	319.722	360.438	199.179	92.7677	49.5665	78.8721	186.27	767.987	432.765	343.794	313.848	467.871	573.166	989.689	1093.91	850.739	CDW43_RS00930	F0F1 ATP synthase subunit gamma
CDS	208074	209615	1542	-	A10189	1037.52	415.976	469.963	314.354	102.273	68.0852	103.31	172.994	925.167	540.562	596.165	380.734	554.922	686.7	1164.18	1259.19	964.684	CDW43_RS00935	F0F1 ATP synthase subunit alpha
CDS	209640	210170	531	-	A10190	863.504	698.668	713.467	620.05	109.889	62.4907	188.493	207.283	1115.45	649.922	633.6	370.674	540.586	640.659	1206.33	1330.92	904.79	CDW43_RS00940	F0F1 ATP synthase subunit delta
CDS	210183	210653	471	-	A10191	1555.08	963.846	998.336	991.125	213.175	179.016	458.265	379.616	1449.65	858.807	857.726	656.227	976.362	1224.18	2074.04	2410.28	1563.35	CDW43_RS00945	F0F1 ATP synthase subunit B
CDS	210699	210932	234	-	A10192	1187.57	631.529	598.401	788.884	323.498	146.455	806.493	523.777	1047.42	558.899	545.081	518.42	756.162	891.183	1765.16	1968.59	1288.08	CDW43_RS00950	F0F1 ATP synthase subunit C
CDS	210990	211889	900	-	A10193	661.646	633.442	618.841	1103.29	393.679	264.735	657.504	424.033	946.139	650.798	540.776	178.509	240.23	294.745	571.47	542.843	376.51	CDW43_RS00955	F0F1 ATP synthase subunit A
CDS	211897	212271	375	-	A10194	423.453	1331.51	1222.65	2110.73	923.801	836.998	1347.78	939.496	1564.5	1275.07	914.999	334.895	422.608	456.484	899.359	916.123	564.578	CDW43_RS00960	ATP synthase subunit I
CDS	212559	213422	864	-	A10195	98.7874	165.725	178.901	215.91	153.324	107.032	106.117	129.618	230.168	180.718	186.882	124.422	147.284	153.848	161.479	174.871	185.554	CDW43_RS00965	ParB/RepB/Spo0J family partition protein
CDS	213439	214221	783	-	A10196	433.492	242.422	219.873	371.419	282.647	270.251	182.961	262.727	318.273	265.178	229.525	162.516	205.735	232.189	289.199	286.898	278.79	CDW43_RS00970	AAA family ATPase
CDS	214227	214853	627	-	A10197	107.636	191.031	170.45	272.573	101.448	83.2882	132.215	82.0235	235.002	227.238	152.656	66.839	77.9906	67.4071	145.59	108.638	87.3114	CDW43_RS00975	16S rRNA (guanine(527)-N(7))-methyltransferase RsmG
CDS	214853	216736	1884	-	A10198	252.858	139.255	137.944	230.71	168.81	145.811	248.599	116.334	144.928	145.97	102.753	132.923	123.366	128.286	146.945	138.695	111.44	CDW43_RS00980	tRNA uridine-5-carboxymethylaminomethyl(34) synthesis enzyme MnmG
CDS	216890	217042	153	+	A10199	0	47.8559	87.1585	102.877	288.611	284.432	931.337	1300.56	30.5761	35.2005	35.2248	11.7872	13.3701	11.7816	13.0269	14.0611	14.2416	CDW43_RS00985	hypothetical protein
CDS	217039	217938	900	-	A10200	50.7262	114.06	97.2743	69.8845	73.0116	88.8495	74.2822	75.8347	54.6941	56.7754	53.7342	56.5136	54.5893	55.6334	65.9112	60.7932	50.2749	CDW43_RS00990	IS982 family transposase
CDS	217984	218259	276	+	A10201	172.603	260.627	229.857	115.941	478.067	601.133	780.656	980.441	262.398	227.939	256.972	179.805	156.864	154.939	174.759	180.648	158.77	CDW43_RS00995	diacylglycerol kinase
CDS	218256	219032	777	-	A10202	74.0839	82.1986	81.4174	90.4705	131.928	138.619	230.099	308.057	89.0844	80.3435	77.9624	40.6425	35.1713	35.3583	53.5152	48.9027	37.3994	CDW43_RS01000	prolipoprotein diacylglyceryl transferase
CDS	219313	220032	720	+	A10203	5050.56	1192.65	1525.56	1812.7	16.7927	6.7997	72.1599	137.517	17.5265	13.3297	44.3128	9.38857	9.79025	9.47789	20.4156	15.8282	9.49416	CDW43_RS01005	TorF family putative porin
CDS	220088	220426	339	+	A10204	6470.07	766.599	1043.41	973.719	66.6796	64.186	105.93	147.454	45.8382	51.5568	78.4297	31.5846	31.8432	31.5719	36.3052	38.6772	24.8573	CDW43_RS01010	P-II family nitrogen regulator
CDS	220445	221728	1284	+	A10205	4347.07	423.008	627.983	359.978	58.5458	47.026	72.0012	134.385	37.0839	38.9958	47.8497	30.0457	32.8771	33.0289	71.2686	59.5935	35.1117	CDW43_RS01015	ammonium transporter
CDS	221800	222864	1065	-	A10206	149.103	71.7463	110.852	68.2907	48.3728	49.0345	40.1752	69.9527	164.08	144.324	79.8203	73.6797	86.4347	89.1622	137.225	128.819	121.89	CDW43_RS01020	uroporphyrinogen decarboxylase
CDS	222998	224404	1407	-	A10207	373.851	168.348	284.031	137.29	135.251	114.44	54.8462	252.107	323.606	327.394	181.102	203.944	211.343	192.322	325.723	318.554	251.555	CDW43_RS01025	FAD-dependent oxidoreductase
CDS	224428	228918	4491	-	A10208	578.111	299.367	424.235	336.587	393.414	313.11	395.293	416.214	425.499	507.948	326.844	311.463	316.669	301.374	484.404	468.651	332.936	CDW43_RS01030	glutamate synthase large subunit
CDS	229153	229647	495	+	A10209	328.818	138.726	143.815	198.724	314.348	341.771	377.392	275.763	226.698	198.481	165.347	139.058	148.808	149.728	230.164	252.958	175.708	CDW43_RS01035	5-(carboxyamino)imidazole ribonucleotide mutase
CDS	229662	230792	1131	+	A10210	100.037	83.0043	82.5149	126.143	75.7617	71.1835	117.883	120.267	147.062	113.312	86.154	76.182	89.9096	107.581	152.281	180.705	132.218	CDW43_RS01040	5-(carboxyamino)imidazole ribonucleotide synthase
CDS	230792	231067	276	+	A10211	201.37	130.256	152.332	189.08	118.088	114.314	200.7	334.36	155.571	117.293	91.6457	114.189	125.357	153.131	223.955	239.214	175.153	CDW43_RS01045	SelT/SelW/SelH family protein
CDS	231121	233403	2283	-	A10212	83.4665	104.526	109.088	96.9074	78.0582	57.1854	91.6989	62.7383	204.52	183.844	132.827	108.018	131.25	136.511	154.482	163.431	165.615	CDW43_RS01050	type I DNA topoisomerase
CDS	233488	233955	468	-	A10213	458.062	1390.77	1582.27	1072.65	939.042	1140.26	600.788	610.046	1215.22	1240.84	997.882	974.428	925.457	866.732	612.521	569.517	815.94	CDW43_RS01055	DUF494 domain-containing protein
CDS	233979	235100	1122	-	A10214	152.143	170.659	192.24	159.204	133.061	144.963	121.553	101.954	185.913	195.613	159.728	237.607	255.776	260.998	231.087	234.832	274.077	CDW43_RS01060	DNA-processing protein DprA
CDS	235111	236145	1035	-	A10215	354.796	237.91	263.517	246.118	231.606	253.33	198.578	230.337	291.003	312.738	405.74	446.301	408.243	398.46	342.416	349.091	373.753	CDW43_RS01065	LysM domain-containing protein
CDS	236329	236646	318	+	A10216	1523.03	456.684	636.38	877.995	1667.97	2114.32	1693.88	1652.02	406.758	464.289	545.492	1165.22	876.333	762.263	572.629	583.09	597.195	CDW43_RS01070	cytochrome c
CDS	236685	237188	504	+	A10217	598.632	404.285	502.207	729.702	559.06	730.698	634.431	637.996	396.673	413.837	364.711	595.794	457.095	383.874	255.714	268.687	311.109	CDW43_RS01075	peptide deformylase
CDS	237197	238129	933	+	A10218	182.963	186.193	225.962	301.792	133.534	148.675	160.098	172.063	193.473	194.721	163.049	229.738	205.974	206.227	147.881	157.576	168.648	CDW43_RS01080	methionyl-tRNA formyltransferase
CDS	238122	239429	1308	+	A10219	133.543	105.055	115.391	129.692	65.1076	64.462	76.5214	91.131	120.999	120.529	69.3314	143.307	145.459	147.152	114.627	114.377	129.651	CDW43_RS01085	16S rRNA (cytosine(967)-C(5))-methyltransferase RsmB
CDS	239407	239988	582	+	A10220	272.844	124.98	147.019	173.144	123.743	146.743	145.72	200.681	136.109	136.94	96.7991	147.048	166.672	171.26	170.288	153.953	165.793	CDW43_RS01090	DUF4390 domain-containing protein
CDS	239973	242132	2160	+	A10221	78.1109	63.2632	62.3645	79.167	35.289	49.8645	34.1345	59.6353	59.6493	57.9453	42.9488	66.6892	73.2137	78.6844	61.3851	60.0153	74.8776	CDW43_RS01095	ATP-binding protein
CDS	242135	243409	1275	+	A10222	158.795	139.08	141.974	159.292	200.378	223.99	271.161	252.196	147.244	151.122	148.057	228.194	213.893	212.763	210.625	212.695	206.327	CDW43_RS01100	sigma-54 dependent transcriptional regulator
CDS	243419	244792	1374	+	A10223	102.57	73.6687	74.7913	84.7255	68.4843	65.3247	63.6705	80.4569	90.1827	84.8237	54.966	152.55	161.352	173.854	167.96	168.17	166.48	CDW43_RS01105	Trk system potassium transporter TrkA
CDS	244832	245353	522	+	A10224	148.3	70.0334	78.6771	76.9075	42.2964	58.3576	62.9387	80.1071	88.8489	68.3984	50.2459	132.397	150.238	165.354	157.406	153.882	170.406	CDW43_RS01110	YqgE/AlgH family protein
CDS	245356	245769	414	+	A10225	134.247	174.231	148.965	177.165	156.181	240.453	173.479	229.872	233.518	201.584	187.804	226.916	249.836	264.666	251.847	258.139	295.369	CDW43_RS01115	Holliday junction resolvase RuvX
CDS	245766	246296	531	+	A10226	108.405	138.047	134.719	150.169	164.338	180.301	133.097	153.878	189.865	162.916	157.656	152.739	164.969	168.038	188.332	178.594	194.972	CDW43_RS01120	bifunctional pyr operon transcriptional regulator/uracil phosphoribosyltransferase PyrR
CDS	246286	247257	972	+	A10227	167.454	99.7245	93.3173	83.4391	106.543	83.3873	104.938	95.9307	129.473	103.509	92.8543	164.715	192.234	210.471	225.122	226.506	219.145	CDW43_RS01125	aspartate carbamoyltransferase catalytic subunit
CDS	247257	248540	1284	+	A10228	123.672	98.2696	80.74	51.9164	71.6469	54.2282	65.4557	57.2728	138.055	135.4	95.9233	177.17	207.097	209.467	272.928	255.876	223.225	CDW43_RS01130	dihydroorotase
CDS	248559	248735	177	+	A10229	145.786	102.117	69.9002	69.3087	26.7297	24.5865	23.7415	21.724	191.745	170.295	135.192	85.1455	107.367	109.752	120.206	133.207	136.07	CDW43_RS01135	DUF3012 domain-containing protein
CDS	248732	249496	765	+	A10230	28.5416	74.7099	50.0851	58.884	42.6044	46.2202	32.4595	40.2106	247.958	230.539	88.015	72.4214	81.5517	101.659	90.8625	89.5348	107.682	CDW43_RS01140	HAD family hydrolase
CDS	250185	251021	837	-	A10232	576.272	510.225	836.073	638.186	1046.34	1035.31	822.924	1502.22	387.166	354.09	525.246	294.917	270.532	236.092	281.137	258.003	256.484	CDW43_RS01150	plastocyanin/azurin family copper-binding protein
CDS	251167	253386	2220	-	A10233	87.6233	69.2853	83.0421	75.1999	69.3808	63.7089	67.9726	78.375	97.3639	94.6859	91.9272	81.5374	74.3663	68.67	72.4075	74.7103	71.3946	CDW43_RS01155	NADP-dependent isocitrate dehydrogenase
CDS	253874	254896	1023	-	A10234	376.42	91.0208	111.42	74.2034	89.9263	49.4524	60.4963	68.5961	101.231	90.1005	94.6173	83.7809	94.6665	102.845	160.126	148.146	126.621	CDW43_RS01160	ABC transporter ATP-binding protein
CDS	254893	256416	1524	-	A10235	457.161	82.6705	91.6527	46.722	34.8386	39.6203	39.6061	35.6382	50.1897	46.3356	50.4047	70.4639	78.2934	86.3339	122.428	107.991	96.4716	CDW43_RS01165	iron ABC transporter permease
CDS	256413	257450	1038	-	A10236	803.154	176.257	201.433	101.083	82.5496	73.3687	113.724	88.4419	81.0376	80.7118	172.447	146.478	142.345	141.951	162.205	173.817	130.364	CDW43_RS01170	extracellular solute-binding protein
CDS	257451	258263	813	-	A10237	625.023	250.498	281.652	121.114	91.1702	105.717	147.546	122.969	82.116	85.0709	581.763	116.529	111.102	103.278	123.957	122.046	101.716	CDW43_RS01175	hypothetical protein
CDS	259557	261725	2169	+	A10238	399.916	250.648	52.1635	350.097	90.6435	109.849	76.616	351.673	35.3952	37.9625	116.021	37.9683	38.6596	39.3422	47.2434	47.234	50.8788	CDW43_RS01185	TonB-dependent receptor
CDS	262548	262973	426	-	A10239	1094.98	1037.42	883.566	804.801	916.861	924.504	698.582	1307.66	1870.95	1637.49	2287.67	8304.06	8661.04	7952.17	5533.35	5843.51	6567.42	CDW43_RS01190	plastocyanin/azurin family copper-binding protein
CDS	263280	264356	1077	-	A10240	40.5465	62.8858	74.9773	49.6906	98.1081	75.7627	82.6475	69.6195	50.8514	54.094	102.75	73.4091	65.1953	56.0395	71.2719	63.2732	51.9493	CDW43_RS01200	AI-2E family transporter
CDS	264424	265599	1176	+	A10241	106.336	66.8155	65.2093	83.5086	154.218	158.197	180.941	98.499	34.3578	36.7246	48.7001	89.5889	98.3368	102.425	75.335	74.7324	94.2666	CDW43_RS01205	efflux RND transporter periplasmic adaptor subunit
CDS	265606	268770	3165	+	A10242	52.6808	47.8149	47.96	56.5716	34.5473	31.9683	66.507	40.3952	36.4155	33.7638	37.0531	68.8154	82.864	92.5652	78.2525	74.164	89.6793	CDW43_RS01210	efflux RND transporter permease subunit
CDS	268746	269276	531	-	A10243	44.8573	61.1246	72.4306	74.3816	82.169	95.2727	87.7718	72.4132	46.9963	48.0319	50.8829	72.8903	56.8187	59.5892	51.47	48.1799	55.7244	CDW43_RS01215	lipocalin family protein
CDS	269325	269582	258	+	A10244	100.016	50.4347	59.8459	68.4303	50.9383	52.7109	35.537	14.9036	41.9815	41.0669	45.399	51.1304	36.6577	27.448	31.8666	29.2976	26.3832	CDW43_RS01220	TIGR03643 family protein
CDS	269608	270003	396	-	A10245	55.1371	58.0579	62.2321	78.5946	37.1696	57.6944	40.5176	43.6948	52.9349	51.5473	60.9709	51.1467	47.1175	38.1229	41.9636	44.1956	46.6004	CDW43_RS01225	MAPEG family protein
CDS	270061	271071	1011	-	A10246	113.874	68.0154	77.5684	102.852	92.0336	116.758	85.3978	105.066	95.6099	90.72	99.2942	73.4362	68.4353	74.9168	66.6836	74.9091	90.1396	CDW43_RS01230	class 1 fructose-bisphosphatase
CDS	271231	272046	816	-	A10247	316.228	152.976	222.534	151.055	121.113	102.662	70.693	273.896	215.846	177.393	148.296	191.151	214.551	209.959	376.701	346.337	268.59	CDW43_RS01235	formylmethanofuran dehydrogenase subunit C
CDS	272043	272945	903	-	A10248	305.544	152.578	268.969	136.178	123.998	81.3254	112.534	312.976	260.303	229.386	199.024	269.213	301.381	315.403	424.64	414.223	392.086	CDW43_RS01240	formylmethanofuran--tetrahydromethanopterin N-formyltransferase
CDS	272942	274609	1668	-	A10249	258.232	137.791	185.235	144.487	90.4504	83.1618	147.038	259.051	203.711	170.617	194.983	215.106	245.517	250.141	316.562	320.718	299.492	CDW43_RS01245	formylmethanofuran dehydrogenase subunit A
CDS	274622	275896	1275	-	A10250	188.374	146.291	195.894	181.641	138.121	121.168	144.42	188.487	162.809	153.125	218.732	171.833	195.745	208.926	234.758	249.565	216.233	CDW43_RS01250	formylmethanofuran dehydrogenase subunit B
CDS	275990	276535	546	-	A10251	145.417	187.283	203.058	236.808	110.721	106.603	136.437	183.102	193.162	177.711	196.492	170.232	178.505	194.284	182.474	200.204	206.038	CDW43_RS01255	SPOR domain-containing protein
CDS	276598	278361	1764	-	A10252	111.4	134.586	139.489	185.82	134.997	130.135	213.751	202.175	206.578	171.831	153.372	83.3046	94.8905	103.428	150.981	153.717	131.575	CDW43_RS01260	arginine--tRNA ligase
CDS	278439	280613	2175	-	A10253	42.8929	72.5029	68.6679	52.419	77.8254	72.5302	53.2198	57.6771	59.8749	67.2817	70.0414	60.3497	56.8544	54.1072	55.349	49.8037	52.9061	CDW43_RS01265	primosomal protein N'
CDS	280859	282463	1605	-	A10254	22.261	24.9018	26.9	25.2556	26.5298	15.9295	24.2781	24.5562	27.7734	35.5123	35.6383	25.278	21.2642	19.6444	17.5096	18.0048	16.8801	CDW43_RS01270	Na/Pi symporter
CDS	282571	283056	486	+	A10255	232.801	245.507	206.977	251.553	400.212	510.397	242.891	193.839	224.98	252.22	294.383	277.869	234.47	210.487	192.135	187.833	176.006	CDW43_RS01275	type 3 dihydrofolate reductase
CDS	283053	283289	237	-	A10256	351.761	461.87	322.058	363.294	1046.93	1448.31	544.826	507.007	340.34	399.813	571.23	535.91	431.155	380.768	320.622	331.08	303.889	CDW43_RS01280	TIGR02647 family protein
CDS	283693	283941	249	+	A10257	534.1	1453.85	987.692	1031.1	1469.38	1562.02	955.825	841.607	548.553	682.823	1073.84	1841.13	1374.1	1115.89	563.915	542.564	855.96	CDW43_RS01285	hypothetical protein
CDS	283953	284297	345	+	A10258	471.782	871.267	664.434	673.258	926.422	983.887	534.832	679.865	407.183	501.923	594.656	1576.29	1192.85	1021.47	462.316	471.812	790.153	CDW43_RS01290	pentapeptide repeat-containing protein
CDS	284301	285044	744	-	A10259	165.411	415.178	377.723	327.115	315.834	316.588	179.715	116.93	303.157	314.267	209.394	361.734	306.479	293.163	188.495	187.602	268.652	CDW43_RS01295	twin-arginine translocase subunit TatC
CDS	285034	285345	312	-	A10260	139.964	318.961	272.704	248.711	828.963	725.302	426.103	212.592	425.467	408.544	267.397	262.417	274.322	269.583	418.266	388.934	304.602	CDW43_RS01300	Sec-independent protein translocase protein TatB
CDS	285360	285605	246	-	A10261	88.7573	340.883	192.483	121.901	888.961	933.162	487.623	197.337	438.295	426.704	408.367	278.684	278.768	261.111	438.931	405.238	323.93	CDW43_RS01305	twin-arginine translocase TatA/TatE family subunit
CDS	285615	285953	339	-	A10262	357.172	378.594	345.743	310.947	2262.46	3331.25	1214.81	527.431	382.791	391.286	468.67	397.765	371.983	389.07	460.136	455.636	436.312	CDW43_RS01310	histidine triad nucleotide-binding protein
CDS	285950	286270	321	-	A10263	321.547	247.552	263.419	242.142	912.168	1298.09	633.135	339.894	297.692	274.114	245.349	357.169	372.124	392.486	448.606	451.027	458.315	CDW43_RS01315	phosphoribosyl-ATP diphosphatase
CDS	286267	286650	384	-	A10264	263.624	129.769	145.44	144.438	138.266	123.245	174.099	106.392	245.748	198.569	176.278	226.712	300.741	370.971	566.402	564.637	484.91	CDW43_RS01320	phosphoribosyl-AMP cyclohydrolase
CDS	286647	287420	774	-	A10265	230.807	145.885	184.688	160.342	134.477	107.53	126.354	103.084	271.407	227.745	197.1	175.942	234.556	265.144	446.841	444.008	347.554	CDW43_RS01325	imidazole glycerol phosphate synthase subunit HisF
CDS	287426	288175	750	-	A10266	545.196	200.217	240.923	233.756	164.013	156.665	213.424	199.947	345.825	301.304	280.44	240.342	317.157	343.071	741.737	640.984	454.717	CDW43_RS01330	1-(5-phosphoribosyl)-5-[(5-phosphoribosylamino)methylideneamino]imidazole-4-carboxamide isomerase
CDS	288201	288836	636	-	A10267	215.347	238.177	261.802	320.51	124.809	138.56	144.16	129.229	436.391	380.923	277.04	155.958	185.896	201.612	299.633	279.569	251.193	CDW43_RS01335	imidazole glycerol phosphate synthase subunit HisH
CDS	288884	289477	594	-	A10268	421.047	304.078	294.356	426.165	562.853	600.755	467.56	449.085	637.401	578.694	456.435	291.551	330.919	375.322	526.338	544.051	458.213	CDW43_RS01340	imidazoleglycerol-phosphate dehydratase HisB
CDS	289575	290324	750	+	A10269	108.51	201.584	169.996	196.888	169.621	274.889	141.603	106.382	160.586	160.778	189.707	224.687	206.841	202.877	164.731	173.968	205.196	CDW43_RS01345	fumarate/nitrate reduction transcriptional regulator Fnr
Pseudo	290579	290641	63	+	A10270	0	173.17	220.202	224.088	158.54	267.671	157.66	122.068	153.005	163.52	100.374	127.516	114.84	113.173	176.77	190.584	170.792	CDW43_RS16770	hypothetical protein
Pseudo	290752	291044	293	+	A10271	27.0981	90.3552	112.311	132.364	61.0008	85.4024	83.4453	80.3805	96.815	106.43	47.3334	94.4357	113.52	111.398	166.49	158.161	130.9	CDW43_RS16775	OmpW family outer membrane protein
CDS	291149	292693	1545	-	A10272	69.3764	49.5036	59.9983	77.3017	68.7302	63.3759	53.409	40.7535	72.9787	75.4355	45.1616	39.1079	43.2401	46.5648	62.9863	56.6014	47.783	CDW43_RS01355	murein biosynthesis integral membrane protein MurJ
CDS	292746	293366	621	+	A10273	9.58907	69.076	67.4326	93.5472	62.6419	53.4341	44.9077	54.9527	110.959	116.855	76.3714	42.7492	42.3239	43.1779	48.4638	50.654	44.2483	CDW43_RS01360	hypothetical protein
CDS	293363	294274	912	-	A10274	15.2353	79.4932	78.5119	104.622	72.6273	45.9278	41.4696	43.7427	116.166	121.647	180.04	95.5405	93.3809	86.5081	74.4686	69.6521	74.4042	CDW43_RS01365	hydrogen peroxide-inducible genes activator
CDS	294415	294579	165	+	A10275	0	94.2028	99.6845	115.655	197.53	210.997	189.854	154.388	136.344	172.007	141.54	205.606	195.68	152.459	139.216	139.899	138.486	CDW43_RS01370	rubredoxin
CDS	294674	295750	1077	+	A10276	3.68605	56.5827	68.6772	70.8144	35.1432	45.4576	47.8859	23.2065	112.548	130.602	75.8618	83.1517	87.0339	84.5673	86.3081	82.0608	87.6952	CDW43_RS01375	DNA replication/repair protein RecF
CDS	295823	298237	2415	+	A10277	101.096	176.519	159.253	197.13	125.163	116.904	147.114	130.56	163.976	176.749	138.391	202.197	194.513	183.458	145.697	158.675	172.836	CDW43_RS01380	DNA topoisomerase (ATP-hydrolyzing) subunit B
CDS	298638	299954	1317	-	A10278	226.075	232.033	199.942	386.812	424.698	338.281	472.525	387.945	293.525	300.183	345.216	262.333	227.063	191.362	202.376	216.574	207.888	CDW43_RS01385	NAD(P)/FAD-dependent oxidoreductase
CDS	300092	300652	561	+	A10279	84.9171	238.695	243.293	183.849	175.228	190.052	159.346	154.217	195.673	232.417	221.34	179.843	149.596	129.846	132.03	141.941	139.93	CDW43_RS01390	flavoprotein
CDS	300645	302072	1428	+	A10280	109.811	192.329	182.181	227.52	120.377	113.9	104.869	102.658	253.703	274.722	157.404	143.734	141.186	138.133	145.017	139.864	151.617	CDW43_RS01395	DUF6513 domain-containing protein
CDS	302080	302670	591	+	A10281	137.703	80.5114	81.0292	75.4516	52.4794	49.7034	51.0657	56.9289	123.726	123.284	78.3027	124.152	140.534	150.706	112.26	120.47	170.708	CDW43_RS01400	DUF447 family protein
CDS	302660	303367	708	+	A10282	140.179	101.098	110.18	82.5104	57.9143	20.7449	37.2311	46.1634	128.3	147.681	94.9994	83.4533	86.6163	94.2485	105.743	113.702	105.443	CDW43_RS01405	(5-formylfuran-3-yl)methyl phosphate synthase
CDS	303427	305706	2280	-	A10283	23.5058	471.596	320.5	342.149	10.8365	12.4065	15.0799	12.4377	419.393	546.607	1348.51	20.1342	19.0355	19.7229	19.2427	19.917	20.0695	CDW43_RS01410	5-methyltetrahydropteroyltriglutamate--homocysteine S-methyltransferase
CDS	305807	306703	897	+	A10284	33.1929	29.5024	38.6579	42.2229	17.5814	19.4061	17.8874	21.9692	29.5977	32.1309	40.6157	36.288	36.8831	37.3386	34.1907	35.4247	31.9125	CDW43_RS01415	LysR family transcriptional regulator
CDS	306700	307503	804	-	A10285	71.596	76.472	88.5012	95.344	42.4993	45.3314	80.776	59.7814	95.1541	93.9812	67.926	139.354	142.867	149.915	119.364	121.46	126.047	CDW43_RS01420	response regulator
CDS	307516	308070	555	-	A10286	236.047	190.013	203.417	190.105	143.024	135.259	251.24	279.725	191.641	209.864	198.614	393.684	375.075	320.934	361.095	331.999	289.035	CDW43_RS01425	DJ-1/PfpI family protein
CDS	308080	309411	1332	-	A10287	409.803	260.666	266.274	290.186	292.046	312.419	415.292	381.411	254.729	278.029	290.078	561.44	507.51	441.887	334.093	326.364	351.834	CDW43_RS01430	S41 family peptidase
CDS	309436	310584	1149	-	A10288	193.484	166.913	162.961	182.042	342.221	383.009	349.772	324.611	156.298	164.259	148.533	245.008	196.008	170.905	139.965	130.964	138.354	CDW43_RS01435	peptidoglycan DD-metalloendopeptidase family protein
CDS	310593	312125	1533	-	A10289	103.584	96.8277	104.904	98.4208	138.879	116.389	162.727	160.214	120.733	158.868	124.967	135.963	123.394	105.68	118.345	113.463	86.6599	CDW43_RS01440	2,3-bisphosphoglycerate-independent phosphoglycerate mutase
CDS	312284	312574	291	+	A10290	109.137	316.098	326.743	412.647	307.1	308.44	370.208	234.54	408.865	423.705	377.072	222.327	219.623	187.991	195.459	182.226	194.883	CDW43_RS01445	metalloregulator ArsR/SmtB family transcription factor
CDS	312610	313029	420	+	A10291	146.507	223.992	231.185	303.909	151.447	174.85	349.278	219.722	377.429	381.721	320.455	295.53	288.605	258.432	235.14	229.324	266.885	CDW43_RS01450	rhodanese-like domain-containing protein
CDS	313046	313303	258	+	A10292	200.032	254.606	250.493	311.584	173.19	139.157	331.679	197.473	465.435	440.587	403.856	324.722	335.994	324.511	206.457	244.522	318.467	CDW43_RS01455	glutaredoxin 3
CDS	313325	313807	483	+	A10293	484.933	279.754	291.207	317.015	114.279	114.877	219.881	163.2	543.565	559.893	618.906	511.406	567.596	577.037	442.055	515.716	643.583	CDW43_RS01460	protein-export chaperone SecB
CDS	313841	314851	1011	+	A10294	261.124	192.355	235.928	203.328	91.5137	92.0078	102.78	142.148	313.753	333.879	265.543	236.338	265.21	251.877	289.849	290.233	295.271	CDW43_RS01465	NAD(P)H-dependent glycerol-3-phosphate dehydrogenase
CDS	314876	315751	876	+	A10295	362.546	249.343	238.62	252.149	204.032	200.576	214.125	261.72	435.255	412.22	358.801	303.108	336.024	320.843	293.762	314.318	351.11	CDW43_RS01470	hypothetical protein
CDS	315805	316968	1164	-	A10296	59.6845	47.1955	39.7078	34.0712	51.0329	45.3314	36.1018	52.8542	57.7254	64.461	49.9429	33.9774	37.1794	37.0423	45.012	45.9311	38.7067	CDW43_RS01475	SAM-dependent methyltransferase
CDS	316985	317704	720	+	A10297	99.2469	76.0669	61.644	51.5209	113.168	126.928	138.483	110.815	77.0378	81.3844	89.6236	88.7886	82.0979	84.0045	91.5241	88.2664	83.5861	CDW43_RS01480	SDR family oxidoreductase
CDS	317636	318163	528	-	A10298	37.5935	71.0007	55.7926	41.9813	45.7982	31.938	54.2646	33.6814	81.9701	78.0436	75.9414	69.1245	72.6218	81.7529	83.2352	83.7478	81.2951	CDW43_RS01485	2-amino-4-hydroxy-6-hydroxymethyldihydropteridine diphosphokinase
CDS	318160	318513	354	-	A10299	89.7147	86.0728	76.5423	69.6755	65.3392	102.956	147.845	97.7578	109.045	93.5626	107.788	71.964	86.3287	82.7914	87.621	85.492	86.065	CDW43_RS01490	dihydroneopterin aldolase
CDS	318590	319186	597	+	A10300	162.918	40.2453	48.519	60.668	132.962	85.6512	109.424	104.663	87.8689	83.4525	57.8961	49.3898	53.845	58.4202	162.337	153.64	70.6556	CDW43_RS01495	glycerol-3-phosphate 1-O-acyltransferase PlsY
CDS	319178	320194	1017	-	A10301	80.022	48.2473	48.1557	50.5799	47.0376	37.4418	56.3456	43.4799	99.0598	88.2945	78.2884	36.9541	40.0718	42.5548	101.591	96.7072	50.274	CDW43_RS01500	tRNA (adenosine(37)-N6)-threonylcarbamoyltransferase complex transferase subunit TsaD
CDS	320347	320562	216	+	A10302	3492.02	3479.28	3815.27	4565.06	3137.07	3132.9	3369.23	1464.18	4197.94	3954.54	1936.52	1517.64	1872.86	1701.55	2468.44	2524.97	2211.91	CDW43_RS01505	30S ribosomal protein S21
CDS	320586	321047	462	+	A10303	932.319	3066.57	3481.39	4033.44	1537.23	1299.89	1504.94	739.69	3555.75	3435.35	1448.53	909.722	1189.93	1135.57	1659.69	1740.12	1342.88	CDW43_RS01510	GatB/YqeY domain-containing protein
CDS	321116	322840	1725	+	A10304	80.5482	225.152	282.715	243.246	172.485	192.047	135.978	79.4105	319.278	366.055	175.585	71.8235	80.6698	87.9648	138.16	135.94	110.282	CDW43_RS01515	DNA primase
CDS	322936	324774	1839	+	A10305	673.519	1139.97	1146.48	1044.55	902.438	772.038	894.918	584.664	1086.48	1571.8	912.436	598.838	583.149	570.608	656.107	673.04	522.395	CDW43_RS01520	RNA polymerase sigma factor RpoD
CDS	324868	326013	1146	-	A10307	564.651	660.491	331.348	57.6867	1584.85	1015.8	812.382	521.325	315.352	475.934	1130.74	1208.67	969.129	803.35	842.378	769.399	607.404	CDW43_RS01530	site-specific integrase
CDS	326642	327340	699	+	A10308	17.0381	19.5731	14.6566	1.53217	21.0574	7.00399	12.0236	13.0647	22.529	41.3374	194.604	41.4971	30.8486	27.3768	22.7754	23.2079	20.0416	CDW43_RS01545	helix-turn-helix transcriptional regulator
CDS	327510	327875	366	+	A10309	86.7732	25.4639	14.8371	3.81291	48.834	52.0196	30.2696	47.2763	28.0467	39.6943	83.835	74.0496	63.3193	55.6713	47.1731	45.1969	43.8344	CDW43_RS01550	plasmid mobilization relaxosome protein MobC
CDS	327856	329661	1806	+	A10310	26.3779	14.7748	8.8284	1.07821	11.0609	6.92772	6.55743	4.52432	22.2323	29.4716	32.03	24.3432	23.6392	21.5663	21.1479	21.7961	21.2101	CDW43_RS01555	relaxase/mobilization nuclease domain-containing protein
CDS	329676	330023	348	-	A10311	22.8154	48.1217	40.3789	28.0709	25.6799	50.0208	35.1286	5.52463	51.1174	63.4224	63.8054	57.7303	49.7232	49.5323	34.4356	36.0896	54.4964	CDW43_RS01560	hypothetical protein
CDS	330083	331171	1089	-	A10312	14.5817	27.1343	41.3013	43.3019	27.5151	32.9683	27.7133	30.0126	33.2994	46.814	64.996	34.2561	30.1852	30.2826	27.8652	27.8175	31.2617	CDW43_RS01565	AAA family ATPase
CDS	331232	331741	510	-	A10313	0	12.1622	10.4942	2.41815	12.369	29.8654	5.99252	18.8487	22.9905	38.9316	186.128	22.5771	17.8499	18.0196	13.3363	15.6192	16.3527	CDW43_RS01570	LAGLIDADG family homing endonuclease
CDS	331820	332050	231	-	A10314	51.5568	32.1948	18.1764	7.16519	97.8545	11.7744	51.2672	22.8877	50.5647	59.4618	54.4383	42.6935	41.6324	38.0416	39.5819	44.9298	42.8649	CDW43_RS01575	helix-turn-helix transcriptional regulator
CDS	332272	332412	141	-	A10315	70.3878	36.4243	25.6492	5.06376	48.4673	23.1479	21.6751	40.9057	52.3033	54.2241	62.6851	61.9843	69.4623	61.6386	178.461	156.495	77.4052	CDW43_RS16575	hypothetical protein
CDS	332532	333662	1131	-	A10316	280.805	33.6087	60.2206	3.70166	193.82	69.7405	106.737	57.7961	24.9758	29.3627	52.1626	63.0799	47.292	30.3534	62.406	54.263	26.6909	CDW43_RS01585	ABC transporter permease
CDS	333664	336426	2763	-	A10317	44.5408	13.727	11.1562	0.72825	15.6012	11.8127	20.1865	9.91553	8.68137	10.5481	10.8971	8.67698	8.11514	8.21328	33.2276	28.6092	10.6046	CDW43_RS01590	ribosome-associated ATPase/putative transporter RbbA
CDS	336430	337509	1080	-	A10318	40.4339	19.932	17.4378	0.631052	36.0191	21.6583	65.4391	8.01071	7.0768	8.75057	12.3756	10.2994	10.4298	9.19475	40.2775	35.3712	11.6233	CDW43_RS01595	efflux RND transporter periplasmic adaptor subunit
CDS	337524	339011	1488	-	A10319	70.7	49.6987	46.3669	2.11562	104.218	51.5461	167.392	18.0887	13.3666	21.0359	145.649	13.2641	13.3904	13.1958	58.3502	57.402	13.8466	CDW43_RS01600	efflux transporter outer membrane subunit
CDS	339490	340128	639	+	A10320	80.7643	50.2371	41.7729	3.96153	55.1186	28.0927	63.9694	24.8219	26.9059	26.548	151.701	35.5057	33.371	36.6472	70.336	72.0208	43.7562	CDW43_RS01605	TetR/AcrR family transcriptional regulator
CDS	340161	341168	1008	+	A10321	47.2604	19.4256	10.819	1.03029	22.425	12.4122	26.9084	12.3975	11.573	12.7677	25.6638	33.3054	39.1206	43.6532	74.2227	71.9883	47.796	CDW43_RS01610	DUF4105 domain-containing protein
CDS	341201	343114	1914	+	A10322	48.7419	16.9086	11.4131	1.05128	26.3666	9.66311	10.3789	8.78918	13.5441	13.1951	19.9732	24.3664	29.7404	32.7945	49.8669	47.5727	39.1099	CDW43_RS01615	alpha/beta fold hydrolase
Pseudo	343139	343516	378	-	A10323	0	15.9943	9.00474	1.37372	5.56279	5.75636	3.03193	5.08616	18.9976	15.956	15.5884	15.2806	20.9908	27.5055	32.889	26.2265	40.0197	CDW43_RS16580	IS30 family transposase
CDS	344220	344969	750	+	A10324	0	17.6564	8.33034	2.68287	24.5319	17.4072	3.05618	0	30.2341	34.6914	35.9293	26.2992	21.1469	19.4422	13.4203	14.8074	17.6117	CDW43_RS01625	hypothetical protein
CDS	345146	345994	849	-	A10325	95.8568	19.3305	14.6783	47.5917	24.148	28.1919	13.0491	26.608	19.1277	23.784	63.8178	23.5148	22.2587	20.4547	25.3834	27.2916	20.8842	CDW43_RS01630	triose-phosphate isomerase
CDS	346039	347043	1005	-	A10326	82.9526	31.9106	11.9877	340.074	15.692	10.2841	11.7838	18.6518	13.4902	15.6386	116.261	15.2468	13.7635	12.9397	20.303	21.8692	12.9032	CDW43_RS01635	class 1 fructose-bisphosphatase
CDS	347124	348194	1071	-	A10327	520.791	172.916	60.4893	1798.52	133.507	78.7267	53.5046	56.995	68.344	43.9561	832.714	36.2566	36.9186	36.3517	86.3729	79.2089	38.989	CDW43_RS01640	fructose-bisphosphate aldolase class II
CDS	348701	349222	522	-	A10328	0	47.0296	50.4923	39.3553	18.127	66.6944	46.8381	38.6724	45.0952	45.5708	71.8585	51.7024	47.0427	45.1387	33.7913	35.6441	44.4579	CDW43_RS01645	ankyrin repeat domain-containing protein
CDS	349399	349572	174	+	A10329	365.046	114.699	118.016	124.221	274.927	190.704	72.4526	146.403	93.2442	93.5312	109.44	169.023	156.6	141.428	104.524	99.2465	134.87	CDW43_RS01650	YqaE/Pmp3 family membrane protein
CDS	349668	349796	129	-	A10330	76.9355	144.898	174.2	192.712	313.78	244.578	183.608	208.651	104.29	112.507	138.704	213.32	175.188	148.968	100.814	118.317	140.81	CDW43_RS01655	entericidin A/B family lipoprotein
CDS	350254	350613	360	+	A10331	88.2194	62.2366	88.6716	71.6695	112.438	139.016	106.117	49.3994	57.8559	73.1297	75.4515	56.0862	47.6475	45.6459	50.6583	45.5464	41.86	CDW43_RS01660	iron dicitrate transport regulator FecR
CDS	350712	351005	294	+	A10332	74.2664	30.3125	52.4797	35.1034	26.8206	37.0052	36.3831	53.9497	34.5605	41.2294	33.4851	37.5343	39.5787	34.8167	30.7611	29.7644	27.7766	CDW43_RS16585	hypothetical protein
Pseudo	351024	351281	258	+	A10333	0	55.3403	65.2706	54.9707	193.566	183.434	119.937	55.8887	59.8251	65.2975	93.3047	55.9697	48.6366	37.3044	37.9503	37.4107	39.5748	CDW43_RS16590	OmpA family protein
CDS	351297	352643	1347	+	A10334	139.992	49.4886	54.454	52.4277	236.109	264.921	158.538	127.386	48.3345	55.442	85.4621	86.3706	79.121	68.9305	66.6036	62.979	53.5828	CDW43_RS01670	TolC family outer membrane protein
CDS	352781	353056	276	-	A10335	43.1508	75.0765	92.4944	76.3142	41.9023	43.3604	76.1278	45.2779	74.9784	91.6116	104.143	57.4372	48.9299	55.9227	52.9872	46.663	37.0987	CDW43_RS16595	molybdopterin dinucleotide binding domain-containing protein
CDS	353075	353443	369	-	A10336	21.5169	60.0383	73.1274	73.2636	48.437	26.5354	33.1294	53.4047	56.6871	62.8752	63.0953	37.1168	36.67	38.6443	51.8534	35.06	35.7178	CDW43_RS16600	hypothetical protein
CDS	353469	353891	423	-	A10337	61.0028	28.9317	40.4457	41.0471	34.797	25.7199	55.9939	24.998	22.9994	26.6784	26.3311	18.1868	19.7417	17.5023	20.261	19.9313	16.2059	CDW43_RS16605	molybdopterin-dependent oxidoreductase
CDS	354007	354324	318	-	A10338	24.9678	22.3671	42.0404	45.9256	39.6742	75.2672	73.2811	93.7102	9.6981	14.2134	13.1063	18.4017	17.1541	12.9566	13.3971	13.8961	11.976	CDW43_RS16610	molybdopterin-dependent oxidoreductase
CDS	354391	354804	414	-	A10339	9.58907	27.0089	59.3641	55.7364	46.9814	26.279	36.9104	61.5315	18.4972	22.4377	26.5564	19.5875	16.3207	12.7512	18.9562	20.1539	12.2265	CDW43_RS16615	molybdopterin-dependent oxidoreductase
CDS	355174	355668	495	+	A10340	380.948	197.09	263.789	270.975	217.707	254.955	233.844	548.612	111.393	123.091	321.404	305.275	271.927	250.197	164.432	178.603	243.549	CDW43_RS01680	thiol peroxidase
CDS	355836	356483	648	+	A10341	165.411	212.847	345.819	190.067	361.813	537.26	344.292	235.129	131.305	156.781	214.689	264.336	237.568	214.196	198.773	194.353	194.079	CDW43_RS01685	hypothetical protein
CDS	356623	357087	465	+	A10342	102.448	62.7596	46.5445	39.0845	52.0031	43.2841	124.876	278.049	99.9963	108.184	151.444	144.422	145.84	143.051	109.193	111.162	137.448	CDW43_RS01690	(2Fe-2S)-binding protein
CDS	357084	359402	2319	+	A10343	93.298	50.3421	42.6961	37.7442	60.525	68.9646	67.3771	203.118	99.831	98.0982	106.099	106.189	111.33	104.507	99.4408	100.606	108.896	CDW43_RS01695	xanthine dehydrogenase family protein molybdopterin-binding subunit
CDS	359405	360400	996	+	A10344	119.575	45.2949	48.4403	45.2924	60.6964	62.8085	59.8349	158.284	77.4245	73.9784	63.4173	69.4266	72.8179	65.1538	80.2448	73.2935	70.2104	CDW43_RS01700	XdhC family protein
CDS	360413	361027	615	+	A10345	38.7305	30.9546	32.6616	46.2801	48.7219	48.6483	28.5741	89.0947	59.5941	53.259	31.6645	42.9817	45.6167	50.6127	50.0304	47.65	56.7357	CDW43_RS01705	nucleotidyltransferase family protein
[truncated: 2,860 more rows]

## Sheet: Cond1-4-6-8 RDA
			Relative transcript levels in TPM
[truncated: 15 more rows]
[truncated: 3,156 more columns]

## Sheet: PCoA-all genes
	Relative transcript levels in TPM
[truncated: 62 more rows]
[truncated: 3,155 more columns]

## Sheet: Nitrogen-PCoA
narXL	nitrate/nitrite transcription regulator
[truncated: 136 more rows]

[truncated: 3 more sheets: N-Permanova, Carbon-PCoA, C-Permanova]
