# Supplementary material for: Modulation of carbon-to-nitrogen ratio shapes the microbial ecology in a methanol-fed recirculating marine denitrifying reactor
Source: PeerJ. 2025 Oct 13;13:e20129. doi: 10.7717/peerj.20129 (PMC12530212; doi:10.7717/peerj.20129)
Supplement: Supplemental Information 8 [file peerj-13-20129-s008.xlsx]

## Sheet: Feuil1
					GenBank: CP021973.1
											PlkAN: Methylophaga-1403 medium, planktonic cultures anoxic conditions with 21.4 mM nitrate and 0.3% methanol C/N: 3
											PlkON: Methylophaga-1403 medium, planktonic culture oxic conditions with 21.4 mM nitrate and 0.3% methanol C/N: 3
											PlkO: Methylophaga-1403 medium, planktonic culture oxic conditions without nitrate and 0.3% methanol
											300N23C: Biofilm static culture in artificial seawater in vial, 21.4 mM nitrate, 0.15% methanol, 23°C
											900N30C: Biofilm culture in artificial seawater in vial, 64.2 mM nitrate, 0.15% methanol, 30°C
											0%NaCl: Biofilm culture in artificial seawater in vial with 0% NaCl, 21.4 mM nitrate, 0.15% methanol, 23°C
											OB: Original Biofilm, IO medium
											Cond1: Recirculating reactor, IO medium, 10.7 mM nitrate, 0.075% methanol, C/N: 1.5
											Cond4: Recirculating reactor, IO medium, 21.4 mM nitrate, 0.3% methanol, C/N: 3
											Cond6: Recirculating reactor, IO medium, 21.4 mM nitrate, 0.75% methanol, C/N: 7.5
											Cond8: Recirculating reactor, IO medium, 42.8 mM nitrate, 0.6% methanol, C/N: 3
						Transcript per million (TPM)
Gene bank tag locus	Start	End	length	Strand	Gene number	OB	300N23C	900N30C	0%NaCl	Cond1	Cond4	Cond6	Cond8	PlkAN1	PlkAN2	PlkAN3	PlkON1	PlkON2	PlkON3	PlkO1	PlkO2	PlkO3	Function
CDW43_RS00375	82091	82849	759	-	A10075	1694.65	707.32	1111.2	2570.97	4555.23	2851.75	1952.39	7416.71	495.754	518.222	643.887	692.819	606.27	541.743	898.05	992.936	573.114	thrombospondin
riboswitch1	82867	82946	80	.	Ribo01	2332.3	957.476	1390.49	3186.59	7845.83	5324.17	4321.64	13452	726.489	758.691	988.055	1310.81	1140.59	982.169	1535.01	1697.45	1042.12	c-di-GMP
CDW43_RS00380	83161	84903	1743	+	A10076	118.436	82.0891	98.3934	69.1349	191.816	249.674	149.478	113.887	99.238	117.677	98.5324	117.946	112.505	107.999	136.562	131.167	116.859	30s ribosomal protein S12 methylthiotransferase accessory protein YcaO
CDW43_RS16805	822475	822546	72	-	A10792	110.274	237.818	192.676	223.122	1577.05	2538.56	2414.17	1595.47	234.445	251.307	314.381	479.763	458.272	431.646	583.747	396.109	393.827	pyrroloquinoline quinone precursor peptide PqqA
riboswitch2	822774	822851	78	.	Ribo02	10713.6	3583.46	2307.38	18590.8	9435.35	6869.44	3080.67	13957.1	451.158	320.589	911.13	481.986	426.313	411.442	578.131	524.418	413.347	c-di-GMP
CDW43_RS03970	822870	823415	546	+	A10793	7158.13	2173.29	1394.15	11234.6	6882.03	4982.46	1658.93	11035.4	211.253	129.467	519.198	198.504	177.175	161.623	348.658	291.787	166.43	hypothetical protein
CDW43_RS04785	984514	986580	2067	-	A10957	27.8487	147.912	149.641	136.96	56.4595	56.5819	91.3011	66.9691	129.142	143.54	116.74	88.7748	102.693	112.553	94.509	110.058	114.088	TonB-dependent receptor
riboswitch3	986642	986747	106	.	Ribo03	243.436	185.614	197.526	159.209	223.168	246.329	425.271	272.062	129.027	135.812	145.751	80.5471	101.17	106.285	136.086	129.454	111.877	c-di-GMP
riboswitch4	1390371	1390447	77	.	Ribo04	20622.7	11951.6	7173.88	37397.7	26011.1	19802.1	12810.2	41666.1	3512.18	1726.11	2937.8	262.713	253.474	270.472	1604.52	1366.77	326.683	c-di-GMP
CDW43_RS16675	1390465	1391052	588	+	A11356	16699.8	6159	4450.07	19680.6	38264.9	34504.6	14289.5	32290.5	1901.72	914.583	1679.51	800.595	757.537	747	2013.24	1598.53	750.607	VPLPA-CTERM sorting domain-containing protein
riboswitch5	1405201	1405394	194	.	Ribo05-ext	5054.43	23888.3	15854.4	2132.27	12445.7	9816.81	4005.33	14052.6	43404.7	41430.8	29226.1	18082.9	17377.1	13962.8	20362.6	20483.2	11936.2	c-di-GMP
CDW43_RS06840	1405423	1405947	525	+	A11368	10340.6	22168.4	14167.8	2714.27	19632.5	15099.7	5291.56	24917.4	40158.4	37253.4	27045.1	21544.7	19494.3	16788.7	25503.2	23311.7	15162.8	PEP-CTERM domain protein
riboswitch6	1406231	1406316	86	.	Ribo06	1546.4	249.7	138.917	286.804	21852.5	34947.3	24031.9	118640	366.746	393.491	203.042	77.4288	126.551	80.0984	110.085	109.528	103.59	c-di-GMP
CDW43_RS06845	1406345	1406875	531	+	A11369	3562.42	475.228	194.814	582.34	17674.3	23981.1	17548.6	83448	287.14	308.227	233.709	84.1005	105.866	74.441	126.962	106.762	84.4854	PEP-CTERM domain protein
riboswitch7	1407172	1407256	85	.	Ribo07	27765.8	33131.9	20834.7	79169.3	88525.1	68137.8	37555.1	57049.4	2210.06	1075.41	2654.54	1831.34	1617.02	1279.8	4267.32	3542.02	1269.84	c-di-GMP
CDW43_RS06850	1407285	1407809	525	+	A11370	21407.1	20210.3	12445.7	43365.1	73378.4	54127.2	29995	43952.7	1794.63	805.832	2069.66	1350.85	1157.44	945.102	3578.54	2833.96	943.412	PEP-CTERM domain protein
CDW43_RS10270	2151545	2153356	1812	-	A12051	165.411	161.713	214.752	100.712	53.0906	78.9546	46.8041	55.9689	143.172	154.208	140.703	90.9254	101.521	113.31	82.084	104.448	93.1316	phosphomethylpyrimidine synthase ThiC
Riboswitch8	2153463	2153567	105	.	Ribo08	53082.9	1490.09	1226.62	572.737	15615.3	31731.9	20803.9	7356.12	1074.11	1372.03	815.766	4920.89	5602.08	5950.53	10497.1	8567.44	3878.99	Thiamine pyrophosphate
CDW43_RS10915	2294201	2296087	1887	-	A12178	27.3494	81.0742	57.8288	75.5714	57.6664	63.4207	58.508	56.8009	156.091	172.949	36.291	24.8287	22.188	23.5234	25.0195	26.3761	22.507	TonB-dependent receptor
riboswitch9	2296147	2296342	196	.	Ribo09	263.308	168.053	162.752	288.444	410.355	435.736	424.903	394.813	344.794	404.832	112.554	38.9284	48.6601	51.5682	476.415	412.796	89.7738	Cobalamin
riboswitch10	2296422	2296624	203	.	Ribo10	567.125	376.557	450.791	327.259	406.563	506.461	334.976	395.405	428.901	469.017	359.293	91.5733	102.994	90.6209	214.284	186.75	101.829	Cobalamin
CDW43_RS10920	2296679	2297254	576	+	A12179	796.042	239.126	351.005	207.346	219.035	226.657	201.623	289.554	321.948	363.814	208.09	61.2184	68.3996	73.3754	116.308	107.809	65.0631	hypothetical protein
riboswitch11	3207836	3207912	77	.	Ribo11	618.682	611.159	787.985	923.888	812.42	1144.47	788.853	836.443	887.333	773.384	1625.68	197.034	228.633	248.734	458.481	424.756	361.367	s-adenosylmethionine
CDW43_RS15590	3208004	3209167	1164	+	A13117	566.15	448.986	581.824	669.352	302.133	216.375	218.252	265.922	776.95	632.431	1308.33	188.848	208.683	237.533	419.577	427.716	312.262	methionine adenosyltransferase
